# Supplementary material for: Nasal oxytocin for the treatment of psychiatric disorders and pain: achieving meaningful brain concentrations
Source: PubMed Central journal article supplement (PMC8272715; doi:10.1038/s41398-021-01511-7), 2021-07-10

## **SUPPLEMENT**

### **Pre-Clinical Pharmacokinetic Distribution Study in Rats for Intranasal Administration of Oxytocin**

#### **PART 1**

## Executive Summary

- ◆ Intranasal oxytocin rapidly reached the central nervous system with very significant concentrations in the trigeminal nerve branches and trigeminal ganglion.
- ◆ High concentrations in olfactory and trigeminal structures confirmed delivery along these pathways. The trigeminal ganglion contained an average concentration of 311 nM while the three major branches, maxillary, mandibular, and ophthalmic, contained average concentrations of 264 nM, 291 nM, and 320 nM respectively. The average concentration of olfactory bulb samples was 33 nM.
- ◆ The highest delivery of oxytocin in the brain was observed in the caudate/putamen (41 nM), parietal cortex (28 nM), septal nucleus (28 nM), pons (26 nM), and medulla (25 nM).
- ◆ Concentrations achieved in the CNS after a single intranasal treatment with 0.4 mg (0.3 umol) oxytocin were high enough to activate high affinity oxytocin receptors in all CNS tissues and both high and low affinity receptors in the trigeminal system and meninges covering the brain.
- ◆ Addition of 1% Avicel mucoadhesive to the oxytocin solution did not markedly affect CNS concentrations achieved with intranasal administration at 30 min. Avicel did increase delivery to the meninges and cervical lymph nodes, but delivery to the trigeminal ganglion was reduced by 50% when Avicel was included in the formulation.
- ◆ The distribution of oxytocin in autoradiography experiments was similar to that identified by gamma counting, with the greatest intensity in the trigeminal ganglion, olfactory bulbs, septal nucleus, and frontal cortex.

## ♦ Table of Contents

|                                                                                                     |       |
|-----------------------------------------------------------------------------------------------------|-------|
| <b>Executive Summary</b>                                                                            | 2     |
| <b>Table of Contents</b>                                                                            | 3-5   |
| <b>Purpose of Study</b>                                                                             | 6     |
| <b>Compounds and Dosing Calculations</b>                                                            | 6-8   |
| <b>General Procedures</b>                                                                           | 8-15  |
| Formulation of Dose Solution                                                                        | 8-9   |
| Animals                                                                                             | 9     |
| Anesthesia                                                                                          | 9     |
| Intranasal Delivery of <sup>125</sup> I-Oxytocin and <sup>125</sup> I-Oxytocin with 1% Mucoadhesive | 10    |
| Transcardial Perfusion                                                                              | 10-11 |
| Brain Dissection                                                                                    | 11-13 |
| Body Dissection                                                                                     | 13-14 |
| Animal Details                                                                                      | 14    |
| Tissue Counting                                                                                     | 15    |
| Autoradiography                                                                                     | 15    |
| Data Analysis and Calculations                                                                      | 15    |
| <b>Results</b>                                                                                      | 16-25 |
| Table 01: Intranasal Delivery of Oxytocin Data Summary                                              | 19    |
| Table 02: Intranasal Delivery of Oxytocin with 1% Mucoadhesive Data Summary                         | 20    |
| Table 03: Intranasal Oxytocin vs. Intranasal Oxytocin with 1% Mucoadhesive                          | 21    |
| Table 04: Extended Time point: Intranasal Oxytocin vs. Intranasal Oxytocin with 1% Mucoadhesive     | 22    |
| Figure 01: Qualitative Distribution after Intranasal Delivery of Oxytocin                           | 23    |
| Figure 02: Qualitative Distribution after Intranasal Delivery of Oxytocin with 1% Mucoadhesive      | 24    |
| Figure 03: Qualitative Distribution of Oxytocin in Trigeminal Ganglion                              | 25    |
| <b>Appendices</b>                                                                                   |       |
| <b>Appendix A – Intranasal Oxytocin Data</b>                                                        | 26-47 |
| Table A01: Intranasal Oxytocin Rat 1 Data                                                           | 27    |
| Table A02: Intranasal Oxytocin Rat 2 Data                                                           | 28    |
| Table A03: Intranasal Oxytocin Rat 3 Data                                                           | 29    |
| Table A04: Intranasal Oxytocin Rat 4 Data                                                           | 30    |
| Table A05: Intranasal Oxytocin Rat 5 Data                                                           | 31    |
| Table A06: Intranasal Oxytocin Rat 6 Data                                                           | 32    |

|                                            |    |
|--------------------------------------------|----|
| Table A07: Intranasal Oxytocin Rat 7 Data  | 33 |
| Table A08: Intranasal Oxytocin Rat 8 Data  | 34 |
| Table A09: Intranasal Oxytocin Rat 9 Data  | 35 |
| Table A10: Intranasal Oxytocin Rat 10 Data | 36 |
| Table A11: Intranasal Oxytocin Rat 11 Data | 37 |
| Table A12: Intranasal Oxytocin Rat 12 Data | 38 |
| Table A13: Intranasal Oxytocin Rat 13 Data | 39 |
| Table A14: Intranasal Oxytocin Rat 14 Data | 40 |
| Table A15: Intranasal Oxytocin Rat 15 Data | 41 |
| Table A16: Intranasal Oxytocin Rat 16 Data | 42 |
| Table A17: Intranasal Oxytocin Rat 17 Data | 43 |
| Table A18: Intranasal Oxytocin Rat 18 Data | 44 |
| Table A19: Intranasal Oxytocin Rat 19 Data | 45 |
| Table A20: Intranasal Oxytocin Rat 40 Data | 46 |
| Table A21: Intranasal Oxytocin Rat 41 Data | 47 |

**Appendix B – Intranasal Oxytocin with 1% Avicel ® Mucoadhesive Data** 48-66

|                                                               |    |
|---------------------------------------------------------------|----|
| Table B01: Intranasal Oxytocin with Mucoadhesive, Rat 20 Data | 49 |
| Table B02: Intranasal Oxytocin with Mucoadhesive, Rat 21 Data | 50 |
| Table B03: Intranasal Oxytocin with Mucoadhesive, Rat 22 Data | 51 |
| Table B04: Intranasal Oxytocin with Mucoadhesive, Rat 23 Data | 52 |
| Table B05: Intranasal Oxytocin with Mucoadhesive, Rat 24 Data | 53 |
| Table B06: Intranasal Oxytocin with Mucoadhesive, Rat 25 Data | 54 |
| Table B07: Intranasal Oxytocin with Mucoadhesive, Rat 26 Data | 55 |
| Table B08: Intranasal Oxytocin with Mucoadhesive, Rat 27 Data | 56 |
| Table B09: Intranasal Oxytocin with Mucoadhesive, Rat 28 Data | 57 |
| Table B10: Intranasal Oxytocin with Mucoadhesive, Rat 29 Data | 58 |
| Table B11: Intranasal Oxytocin with Mucoadhesive, Rat 32 Data | 59 |
| Table B12: Intranasal Oxytocin with Mucoadhesive, Rat 33 Data | 60 |
| Table B13: Intranasal Oxytocin with Mucoadhesive, Rat 34 Data | 61 |
| Table B14: Intranasal Oxytocin with Mucoadhesive, Rat 35 Data | 62 |
| Table B15: Intranasal Oxytocin with Mucoadhesive, Rat 36 Data | 63 |
| Table B16: Intranasal Oxytocin with Mucoadhesive, Rat 37 Data | 64 |
| Table B17: Intranasal Oxytocin with Mucoadhesive, Rat 38 Data | 65 |
| Table B18: Intranasal Oxytocin with Mucoadhesive, Rat 39 Data | 66 |

**Appendix C – Intranasal Oxytocin Extended Time point (1 h)** 67-69

|                                                                         |    |
|-------------------------------------------------------------------------|----|
| Table C01: Intranasal Oxytocin Rat 30 (1 h sac) Data                    | 68 |
| Table C02: Intranasal Oxytocin with Mucoadhesive, Rat 31 (1 h sac) Data | 69 |

**Appendix D – Autoradiography Images** 70-86

|                                           |    |
|-------------------------------------------|----|
| Figure D01: Rat 10 Autoradiography Images | 71 |
| Figure D02: Rat 11 Autoradiography Images | 72 |

|                                           |    |
|-------------------------------------------|----|
| Figure D03: Rat 12 Autoradiography Images | 73 |
| Figure D04: Rat 13 Autoradiography Images | 74 |
| Figure D05: Rat 14 Autoradiography Images | 75 |
| Figure D06: Rat 15 Autoradiography Images | 76 |
| Figure D07: Rat 16 Autoradiography Images | 77 |
| Figure D08: Rat 17 Autoradiography Images | 78 |
| Figure D09: Rat 22 Autoradiography Images | 79 |
| Figure D10: Rat 23 Autoradiography Images | 80 |
| Figure D11: Rat 28 Autoradiography Images | 81 |
| Figure D12: Rat 29 Autoradiography Images | 82 |
| Figure D13: Rat 34 Autoradiography Images | 83 |
| Figure D14: Rat 35 Autoradiography Images | 84 |
| Figure D15: Rat 36 Autoradiography Images | 85 |
| Figure D16: Rat 37 Autoradiography Images | 86 |

**Appendix E – Coronal Rat Brain Slices** 87-94

|                                     |    |
|-------------------------------------|----|
| Figure E01: Brain Slice 01          | 88 |
| Figure E02: Brain Slice 02          | 88 |
| Figure E03: Brain Slice 03          | 89 |
| Figure E04: Brain Slice 04          | 89 |
| Figure E05: Brain Slice 05          | 90 |
| Figure E06: Brain Slice 06          | 90 |
| Figure E07: Lateral Brain Bisection | 91 |

## **Purpose of Study**

The purpose of this study was to quantify the concentration and distribution of oxytocin in the central nervous system (CNS) and peripheral tissues after intranasal delivery to anesthetized rats. We examined the distribution of oxytocin at 30 min after the onset of intranasal delivery. In addition, the effect of a mucoadhesive (Avicel®) on delivery to the CNS was examined. In all cases, a combination of <sup>125</sup>I-labeled oxytocin and unlabeled oxytocin was delivered. At 30 min after the onset of delivery, each animal was perfused with saline while under anesthesia followed by 4% paraformaldehyde and tissues dissected. The concentration of oxytocin in the tissues was quantified using gamma counting while the distribution was visualized using autoradiography. The delivery results of both oxytocin formulations were then compared.

## **Compounds and Dosing Calculations**

Oxytocin was custom <sup>125</sup>I-radiolabeled by GE Healthcare in three batches (10/3/07, IMQ.7836v, Batch 0740; 10/23/07, IMQ.7836v, Batch 0743; 11/13/07, IMQ.7836v, Batch 0746) with initial concentrations of 2.30 mCi/ml, 2.32 mCi/ml, and 2.32 mCi/ml respectively. All batches had a specific activity of 2000 Ci/mmol. Radiolabeled oxytocin was prepared in a buffer containing 10 mM sodium phosphate (pH 7.4), 2.7 mM potassium phosphate, 127 mM sodium chloride, and 3.7% acetonitrile, 0.015% TFA. Using the molecular weight of oxytocin (1007.19 g/mol) the hot solution was calculated to contain 1985.72 uCi/ug at synthesis.

Cold oxytocin was purchased from Sigma Aldrich (BioChemika, acetate salt, ≥ 97%), product number 75968, lot 1322440. The product was stored at -20°C until ready for use.

Avicel RC-591® mucoadhesive was obtained from FMC BioPolymer (Philadelphia, PA). The hygroscopic powder was stored at ambient temperature. At the advice of FMC staff, it was decided to use the mucoadhesive at a concentration of 1% by weight in the dosing solution. Dosing calculations for animals receiving mucoadhesive were adjusted accordingly to account for 1% mucoadhesive.

The desired volume for intranasal delivery to anesthetized rats was 48 ul. The total prepared solution contained ~48 ul for dosing, 9 ul for standards, and 5 ul for evaporation totaling 62 ul. Using information provided by GE Healthcare, the volume and concentration of hot and cold oxytocin in each dose solution was calculated with a desired dose of 45 uCi and 0.4 mg oxytocin.

*Sample Calculations: <sup>125</sup>I-Oxytocin: Batch I, Rat 1*

To reach the desired 0.4 mg oxytocin while maintaining a 48 ul dose solution, the cold oxytocin solution (for use with non-mucoadhesive animals) was prepared at 15 mg/ml.

Volume hot to deliver = desired uCi / (uCi/ul at synthesis) / (decay rate of <sup>125</sup>I \* (date of delivery - date of synthesis))

Delivery date 10/08/07:

Volume hot to deliver= $45 \text{ uCi} / 2.30 \text{ uCi/ul} / (e^{(-0.01155 * 5 \text{ days})}) = 20.73 \text{ ul}$

Volume cold to deliver= $\text{desired mg} - (\text{ul hot} * (\text{uCi/ul at synthesis}) / (\text{uCi/ug at synthesis} / 1000)) / (\text{cold ug/ul}) * 1000$

Delivery date 4/24/07:

Volume cold to deliver= $(0.4 \text{ mg} - (20.73 \text{ uL} * 2.3 \text{ uCi/ul} / 1,985.7 \text{ uCi/ug} / 1000)) / 15 \text{ ug/ul} * 1000 = 26.67 \text{ ul}$

Total volume to deliver=  $20.73 + 26.67 = 47.4 \text{ ul}$

Volume hot to make dose solution= $\text{total ul desired} / \text{total ul in dose solution} * \text{ul hot in dose solution}$

Delivery date 10/08/07:

Volume hot to make dose solution= $61.39 \text{ ul} / 47.4 \text{ ul} * 20.73 \text{ ul} = 26.85 \text{ ul}$

Volume cold to make dose solution= $\text{total ul desired} / \text{total ul in dose solution} * \text{ul cold in dose solution}$ .

Delivery date 10/08/07:

Volume cold to make dose solution:  $61.39 \text{ ul} / 47.4 \text{ ul} * 26.67 \text{ ul} = 34.54 \text{ ul}$

Total volume to make dose solution (dose, standards, evaporation) =  $26.85 + 34.54 = 61.39 \text{ ul}$

*Sample Calculations: <sup>125</sup>I-Oxytocin with 1% Avicel®: Batch III, Rat 31*

In an effort to minimize differences between dosing solutions with and without mucoadhesive, all solutions were aliquoted in the absence of mucoadhesive and frozen until ready for use. To account for the additional volume to be added on the day of delivery, dosing solutions that were to contain mucoadhesive were initially aliquoted at a higher concentration. Upon addition of mucoadhesive on the day of delivery, the dosing solution was diluted to the appropriate 0.4 mg oxytocin in ~48 ul. The cold oxytocin solution for use with mucoadhesive animals was prepared at 69.6 mg/ml.

Volume hot to deliver= $\text{desired uCi} / (\text{uCi/ul at synthesis}) / (\text{decay rate of } ^{125}\text{I} * (\text{date of delivery} - \text{date of synthesis}))$

Delivery date 11/15/07:

Volume hot to deliver= $45 \text{ uCi} / 2.32 \text{ uCi/ul} / (e^{(-0.01155 * 2 \text{ days})}) = 19.85 \text{ ul}$

Volume cold to deliver= $\text{desired mg} - (\text{ul hot} * (\text{uCi/ul at synthesis}) / (\text{uCi/ug at synthesis} / 1000)) / (\text{cold ug/ul}) * 1000$

Delivery date 11/15/07:

Volume cold to deliver= $(0.4 \text{ mg} - (19.85 \text{ uL} * 2.32 \text{ uCi/ul} / 1,985.7 \text{ uCi/ug} / 1000)) / 15 \text{ ug/ul} * 1000 = 26.67 \text{ ul}$

Of the 26.67 ul cold to deliver, 5.75 ul will be 69.6 mg/ml oxytocin while 20.92 ul will be 2.29% Avicel.

Total volume to deliver=  $19.85 + 26.67 = 46.52 \text{ ul}$

Volume hot to make dose solution= $\text{total ul desired}/\text{total ul in dose solution}*\text{ul hot in dose solution}$

Delivery date 11/15/07:

Volume hot to make dose solution= $60.51 \text{ ul}/46.51 \text{ ul} *19.85 \text{ ul}=25.82 \text{ ul}$

Volume cold to make dose solution= $\text{total ul desired}/\text{total ul in dose solution}*\text{ul cold in dose solution}$ .

Delivery date 11/15/07:

Volume cold to make dose solution:  $60.51 \text{ ul}/46.51 \text{ ul} *26.67 \text{ ul}=34.69 \text{ ul}$

Volume of cold that is 69.6 mg/ml oxytocin:  $(\text{vol } 69.6 \text{ mg/ml oxytocin to deliver})/(\text{total volume cold to deliver}) * (\text{total volume cold to make dose solution}) = 5.75 \text{ ul}/26.67 \text{ ul} *34.69 \text{ ul} = 7.47$

Volume of 2.29% Avicel to make dose solution:  $(\text{total volume cold to make dose solution} - \text{vol. } 69.6 \text{ mg/ml oxytocin}) = 34.69 \text{ ul} - 7.47 \text{ ul} = 27.22 \text{ ul}$  2.29% Avicel

Total volume to make dose solution (dose, standards, evaporation) =  $25.82+7.47+27.22=60.51 \text{ ul}$

## **General Procedures**

Throughout experimental procedures, strict precautions were followed to prevent radiation exposure and contamination of animal tissues, surgical tools, and equipment. Geiger counters were placed at each work station to continuously screen tools, workspace, and staff. Personal protective equipment including double layered gloves, lab coats, eye protection, masks, and bouffant caps was worn at all times. Lead impregnated shields were used to minimize exposure to radiation. Radioactive monitoring badges were also worn by staff throughout experimental procedures to quantify exposure.

### ***Formulation of Dose Solution***

To make the cold solution, a volume of 1X phosphate buffered saline (PBS) was prepared by diluting 10X PBS (Sigma Aldrich) into sterile water. Oxytocin was then weighed and added to the 1X PBS, making a solution of either 15.0 mg/ml or 69.6 mg/ml oxytocin in 1X PBS, pH 7. The solution was vortexed to ensure proper mixing.

According to dosing calculations, the corresponding volumes of hot and cold oxytocin were then added to pre-labeled 1.5 ml microcentrifuge tubes. The tubes were then sealed with parafilm, placed in lead-lined storage containers, and stored at  $-20^{\circ}\text{C}$  until ready for use.

A solution of 2.29% Avicel® was made in 1X PBS by combining 1.145 g Avicel and 48.855 ml 1X PBS. The Avicel® was first added to a 50 ml conical tube to which 5-10 ml 1X PBS was added. The mixture was vigorously stirred to combine. 1X PBS was added in 5-10 ml increments and vortexed until 48.855 ml 1X PBS had been added. To thoroughly incorporate the mucoadhesive, high speed mixing was necessary. A probe sonicator was used to homogenize the solution which reached a yogurt-like consistency when adequately mixed. However, when shear



was applied to the Avicel solution, the texture immediately loosened to a milk-like state. Again, as the solution set, the yogurt-like consistency returned. This mixture was stored in a sealed conical tube at ambient temperature.

On the day of delivery, the dosing solution was brought to room temperature on the bench top. If necessary, 2.29% mucoadhesive was added when the solution reached ambient temperature. The resulting solution contained 1% Avicel, 45 uCi, and 0.4 mg oxytocin. All dosing solutions were vortexed prior to delivery.

### ***Animals***

Adult male Sprague Dawley rats (N=41, 225-250 g) were used throughout the study. Animals were group-housed in the Regions Hospital Animal Care Facility with free access to food and water. Animals were kept on a 12 h light cycle. All experimental procedures were approved by the Animal Care and Use Committee at HealthPartners Research Foundation.

There were four experimental groups of animals: group I received  $^{125}\text{I}$ -Oxytocin and was analyzed with gamma counting, group II received  $^{125}\text{I}$ -Oxytocin with 1% Avicel and was analyzed with gamma counting. group III received  $^{125}\text{I}$ -Oxytocin and was analyzed with autoradiography, and group IV received  $^{125}\text{I}$ -Oxytocin with 1% Avicel and was analyzed with autoradiography.

### ***Anesthesia***

Prior to anesthesia, each rat was weighed.

- a. An anesthesia cocktail was made containing 3 parts ketamine, 3 parts xylazine, and 1 part acepromazine. A separate syringe containing pentobarbital was also drawn.
- b. A 1-cc syringe fitted with a 22G, 1 in needle was assembled.
- c. Full, half, and quarter doses of the ketamine cocktail were calculated according to the animal's weight at 0.5 ml/kg. A half dose of pentobarbital was also calculated at 50 mg/kg for use just prior to exsanguination.
- d. A full dose of the ketamine cocktail was drawn into the syringe for injection.
- e. The rat was placed ventral side down in the middle of a small hand towel.
- f. The towel was wrapped around the animal's head and shoulders to restrain it.
- g. With the animal restrained, a large flap of skin was gently pinched above the animal's right rear limb.
- h. The needle was inserted subcutaneously into the skin fold at a 45° angle.
- i. The plunger was pulled back to check for air or a blood flash.
- j. If no blood was present, the anesthesia was pushed into the skin fold.
- k. The rat was removed from the hand towel and placed in a holding cage.
- l. The time and volume of anesthesia was noted on the animal's data sheet.
- m. The animal's anesthesia level was assessed by pinching of the hind paw or tail. If the animal solicited a reflex, a ½ or ¼ dose booster was administered as necessary.
- n. If the animal required an additional booster during drug delivery, the booster was given subcutaneously above the animal's left hind limb as follows:
  - i. A skin flap above the hip joint was gently pinched and the needle inserted into the fold.
  - ii. The plunger was pulled back to check for a blood flash.

- iii. If none was present, the booster was injected.
- iv. The time and dose were noted on the data sheet.

### ***Intranasal Delivery of <sup>125</sup>I-Oxytocin***

Anesthesia was monitored throughout the procedure. The animal's reflex was assessed by pinching the hind paw or tail while stabilizing the head to prevent movement. Quarter and half dose boosters of the ketamine cocktail were delivered subcutaneously as needed. Intranasal delivery was performed as follows:

- a. The fully anesthetized rat was placed on its back on a heating pad in a metal surgical tray inside a fume hood. A properly lubricated rectal probe was inserted to monitor and maintain the rat's core temperature at 37°C.
- b. Two 2"x2" gauze pads were rolled into a pillow and taped to secure. The pillow was then placed under the rat's head to maintain the position of the head so that the underside of the neck and mouth were horizontal.
- c. A cotton swab to be used for occlusion of nostrils was covered with parafilm.
- d. A lead impregnated shield was placed in front of the surgical tray to protect the experimenter from radiation.
- e. The dose solution, pipette, 30 ul pipette tips, and waste receptacle were arranged behind the shield for easy access.
- f. A series of three 3 ul standards were aspirated from the microcentrifuge tube containing the dosing solution and expelled into pre-weighed and labeled gamma counting tubes.
- g. A 6 ul drop was loaded into the pipette behind the shield.
- h. The cotton swab was used to occlude one naris completely. The flat part of the swab was pushed gently against the naris at approximately a 45° angle to prevent airflow.
- i. Holding the pipette vertically, the 6 ul drop was slowly expelled, forming a drop at the end of the tip.
- j. The drop was lowered onto the open naris to be inhaled and the cotton swab was removed from the opposite naris.
- k. The drop was inhaled.
- l. The time and volume of the drop were recorded on the animal's data sheet.
- m. After two minutes, the alternate naris was occluded and a 6 ul drop was administered in the same fashion to the open naris. The cotton swab was removed and the time was noted.
- n. A drop was administered as described above every two minutes to alternating nares until a total of 8 drops were delivered (4 to each naris) for a total of ~48 ul.
- o. Each drop was noted on the data sheet as well as any details regarding the animal or success of delivery.

### ***Transcardial Perfusion***

- a. Eight minutes prior to exsanguination, a half dose of pentobarbital was administered as an intraperitoneal injection to the anesthetized rat to ensure surgical level of sedation.
- b. Two min before the desired sacrifice time, the rectal probe and heating pad were removed from the metal surgical tray. While still on its back, labeling tape was used

- to secure the animal's front limbs to the pan. The back of the pan was elevated slightly to allow blood to flow away from the animal.
- c. A toothed forceps was used to grasp the skin/fur covering the sternum. A cut was made through the animal's skin, exposing the sternum.
  - d. The sternum was clamped with a hemostat. The rib cage was cut open laterally, exposing the diaphragm.
  - e. The diaphragm was cut to expose the pleural cavity.
  - f. Surgical scissors were used to cut up the sides of the ribcage toward the armpits of the animal, creating a 'V' shaped incision exposing the heart.
  - g. The hemostat holding the sternum was taped above the animal's head to hold the cavity open.
  - h. The heart was stabilized using the blunt forceps while a 1 cc-syringe with 20 G, 1" sharp needle was inserted into the left ventricle. Approximately 0.2 cc of blood was removed and placed into a pre-weighed tube for gamma counting.
  - i. A small cut was made in the left ventricle using a spring scissors and an 18 G blunt needle attached to an extension set filled with 60 cc of saline was inserted through the left ventricle and into the aorta.
  - j. A large bulldog clamp was placed just above the heart on the aorta, securing the blunt needle in place.
  - k. The animal was perfused with 60 ml of saline followed by 360 ml of 4% paraformaldehyde at a rate of 15 ml/min.

### ***Brain Dissection- Gamma Counting***

Immediately after collection, each tissue sample was placed into a pre-labeled and pre-weighed gamma tube for quantification.

- a. The skin and muscle around the neck were cut with a scalpel just above the shoulder blades. A large curved scissors was used to decapitate the animal, cutting dorsal to ventral to avoid contamination from the trachea and esophagus.
- b. A midline incision was made on the dorsal side of the skull. The skin was peeled back up to the eyes.
- c. A straight hemostat was used to peel the bone away from the top half of the brain. The top of the brain was exposed all the way to the olfactory bulbs.
- d. Using a spring scissors and curved forceps, dorsal dura was collected off the surface of the brain.
- e. The head was inverted and the brain was removed using a small spatula to free it from the cavity. The posterior optic nerve and trigeminal nerves were trimmed close to the brain using a spring scissors. The brain was then placed into a clean Petri dish, covered with a kim-wipe moistened with 1X PBS, and placed aside for later dissection.
- f. The ventral dura was collected from the skull cavity by scraping a forceps on the walls. The collected dura was placed into a pre-weighed gamma tube.
- g. The ophthalmic branch of the trigeminal nerve was visualized on the inside of the skull. The scalpel was then used to carefully slice through the skull on the caudal side of the nerve, creating a vertical slice in the wall of the skull running parallel to the nerve.

- h. A small hemostat was used to chip away the wall of the skull just up to the ophthalmic nerve.
- i. A small spatula was run under the nerve and the skull, freeing the nerve from the skull wall. The nerve was then trimmed from the cavity and placed in the appropriate tube.
- j. Once both sides of the ophthalmic nerve had been collected, the small hemostat was again used to chip away the bottom portion of the skull walls on both sides.
- k. When the muscle layers were visible, the small spatula was used to tease out the mandibular nerve on both sides. Care was taken to retrieve a large portion by following the nerve into the lower jaw and chipping bone away with a hemostat if necessary.
- l. Finally, the maxillary nerve and trigeminal ganglion were collected. The ganglion were removed with a curved forceps, trimming them from the maxillary segment just in front of the branching using a spring scissors.
- m. The maxillary segment was collected by first removing any residual dura from the area using a forceps. Then, the curved forceps was used to gently pull the maxillary nerve while a spring scissors was inserted into the cavity as far as possible and used to snip the nerve from the remaining portion.
- n. Once all of the nerve segments had been collected, the head was set aside and covered with a moist kim-wipe for later dissection.
- o. The brain was retrieved and uncovered for dissection.
- p. The brain was placed dorsal side down in a coronal brain matrix.
- q. A razor blade was inserted at the optic chiasm. Additional blades were placed every 2 mm outward from the optic chiasm. Slices were generated from the midbrain to the tip of the forebrain, resulting in 6 slices. The blades were removed and inverted for dissection.
- r. The olfactory bulbs were retrieved from the brain matrix and trimmed of any excess tissue. The bulbs were rostral to the first slice.
- s. Tissues were dissected from corresponding slices (1-6) as diagrammed in Appendix E.
- t. The remaining brain tissue in the matrix was retrieved and the upper cervical spinal cord was dissected and placed in the appropriate tube.
- u. The brain segment was then bisected along the midline. Following figure 7 in Appendix E, the midbrain, pons, and medulla were collected by scoring each half straight down from the inferior colliculus. This marked the midbrain. Another score was made under the point in the fourth ventricle, marking the medulla. The cerebellum was peeled off and placed in the corresponding tube. If necessary, remaining cortex was also removed. Following the previously made scores, the midbrain, pons, and medulla were dissected and placed into pre-weighed tubes.
- v. Next, the head was retrieved and the ventral side of the neck was cut anteriorly. The skin was peeled back exposing the neck muscles. The superficial nodes were dissected, cleared of connective tissues, and placed in pre-weighed gamma tubes.
- w. The deep cervical nodes were located, dissected, cleared of connective tissue, and placed into pre-weighed tubes.
- x. The thyroid was collected by gently peeling it off of the trachea with a forceps.

- y. A single edge razor blade was then used to bisect the skull along the midline. The olfactory and respiratory epitheliums were collected from the cavity by scoring the edges and removing with a forceps. Care was taken to avoid the nasal septum.

### ***Brain Dissection- Autoradiography***

Prior to dissection, the autoradiography slides were prepared. A piece of corrugated cardboard was cut approximately 2 inches wider and ½ the length of the autoradiography screen to be used. Seven microscope slides were secured to the cardboard with white glue. The cardboard and slides were labeled for later identification.

- a. The brain was removed from the skull as described above.
- b. The ventral dura was collected as described above and placed into a pre-weighed gamma tube.
- c. Next, the trigeminal ganglion with a portion of each of the three major branches was collected. First, the ophthalmic branch of the trigeminal nerve was visualized on the inside of the skull. The scalpel was then used to carefully slice through the skull on the caudal side of the nerve, creating a vertical slice in the wall of the skull running parallel to the nerve.
- d. A small hemostat was used to chip away the wall of the skull just up to the ophthalmic nerve.
- e. A small spatula was run under the nerve and the skull, freeing the nerve from the skull wall. The ophthalmic nerve was trimmed, leaving a large portion attached to the trigeminal ganglion.
- f. The small hemostat was again used to chip away the bottom portion of the skull walls on both sides to visualize the mandibular portion of the nerve.
- g. When the muscle layers were visible, the small spatula was used to tease out the mandibular nerve. Care was taken to retrieve a large portion by following the nerve into the lower jaw and chipping bone away with a hemostat if necessary, while still leaving the nerve attached to the trigeminal ganglion.
- h. A forceps and spring scissors were used to remove any residual dura from the ganglion and maxillary nerve. A small spatula was used to tease the ganglion and maxillary portion from the cavity. Using a curved forceps, the ganglion with three branches attached was carefully removed from the skull. A spring scissors was used to trim the last branch, the maxillary nerve, freeing it from the skull.
- i. The ganglion and branches were then arranged on the microscope slide in the anatomical configuration, leaving all three branches easily visible, stemming from the ganglion.
- j. When both ganglion had been collected and arranged on the microscope slide in the proper orientation, the head was set aside and covered with a moist kim-wipe for later dissection.
- k. The brain was retrieved and placed dorsal side down in a coronal brain matrix.
- l. A razor blade was inserted at the optic chiasm and the blade was marked with a permanent marker for later identification.

- m. Additional blades were placed every 1 mm outward from the optic chiasm. Slices were generated along the entire brain, from the front of the olfactory bulbs to the back of the cerebellum.
- n. The blades were removed one by one starting at the olfactory bulbs, inverted, and arranged on the microscope slides.
- o. The slices were labeled in reference to the optic chiasm, positive in the rostral direction and negative in the caudal direction.
- p. Once all of the slices in the brain matrix were positioned on the slides, the remaining upper cervical spinal cord was retrieved.
- q. Using a forceps and single edged razor blade, the upper cervical spinal cord was stabilized while 1 mm slices were cut. The slices were then arranged on the slides and labeled for later identification.
- r. Next, the superficial nodes, deep cervical nodes, thyroid, and olfactory and respiratory epitheliums were collected as described above.

### ***Body Dissection***

- a. The rat was placed on its stomach and a superficial incision was made down the length of the animal from shoulders to hips, following the spine.
- b. The skin was peeled away from the underlying tissue on both sides to expose the shoulder blades.
- c. The axillary nodes in the connective tissue surrounding the shoulders were dissected, cleared of connective tissue, and placed in pre-weighed tubes.
- d. A piece of right deltoid muscle was dissected, approximately 3 mm square, and placed into a pre-weighed gamma tube.
- e. The rat was flipped onto its back and the sternum was cut vertically to further expose the abdominal and pleural cavities.
- f. 3 mm square samples of the following tissues were dissected and placed into pre-weighed gamma counting tubes.
  1. liver, right superficial lobe
  2. left kidney, tip
  3. right lung, top lobe
  4. spleen, tip
  5. heart, apex
- f. Urine was removed from the bladder using a 1cc syringe and transferred to a pre-weighed tube.
- g. A section of both the trachea and the esophagus were collected at the point of decapitation and placed in respective tubes.
- h. The body was flipped over onto its stomach. The muscles overlying the spine were scored with a scalpel. A small hemostat was inserted into the spinal column, above the cord, at the point of decapitation. The hemostat was clamped on the overlying vertebrae and tissues. The vertebrae and tissues were chipped away using an upward motion. The hemostat was inserted into the column repetitively, chipping away small pieces of the column each time, until the entire length of the cord was exposed.
- i. When the spinal cord was fully exposed, a small spatula was used to loosen the cord from the spinal cavity. The spinal cord was than removed using a forceps and placed into a petri dish.

- j. The intact spinal cord was cut into lower cervical, thoracic, and lumbar portions. The dura was peeled off of each section using a forceps and small spatula. All sections and the dura were then placed in respective pre-weighed tubes.

### ***Tissue Counting***

The pre-weighed gamma tubes containing samples were reweighed to determine tissue weight. Tissue samples were then counted using a COBRA II Auto-Gamma Counter. The samples were counted under a standard <sup>125</sup>I protocol with 5 min count time and an elevator position of 3. In analysis of gamma counting results, any value outside two standard deviations of the mean for each tissue was considered an outlier and removed from the data set.

### ***Autoradiography***

Samples were placed in a felt lined box and an autoradiography screen (Super Sensitive, Packard Instrument Co.) was placed on top of the tissue samples. The box was closed and allowed to rest for 4 weeks. After 4 weeks, the screen was developed using the Packard Cyclone Storage Phosphor System.

### ***Data Analysis and Calculations***

Sample calculations for rat 1 were completed by hand and imported to Microsoft EXCEL®. All values were then auto-calculated using identical spreadsheets and double checked for accuracy.

#### ***Sample Calculations***

Specific activity from Amersham Specs = (uCi delivered\*decay on day counted/decay on day delivered)/estimated nmol delivered \* (2.22\*10<sup>6</sup> CPM/fmol) \* counting efficiency \* (10<sup>-6</sup>) = specific activity (cpm/fmol)

Example: Rat 1 = (45.58 uCi \* 0.9439 / 0.9439) / 402.23 nmol \* (2.22 \* 10<sup>6</sup> CPM/fmol) \* 0.8 \* (10<sup>-6</sup>) = 0.201 CPM/fmol

Specific Activity from Standards = 1/ (average volume of standards (ul) \* concentration of dose solution (ug/ul)/oxytocin molecular weight (ug/umol)/ average of standards (cpm-background)\*10<sup>9</sup> fmol/umol) = specific activity (CPM/fmol)

Example: Rat 1 = 1/ (3 ul \* 8.44 ug/ul / 1007ug/umol / 4,129,668 cpm \* 10<sup>9</sup> fmol/umol) = 0.164 CPM/fmol

nM tissue concentration (from Amersham Specs) = (CPM-background)/ (specific activity from specs in cpm/fmol)/ (tissue weight) \* 10<sup>3</sup> ml/L \* 10<sup>-6</sup> fmol/nmol = nM tissue concentration

Example: Rat 1, Olfactory bulbs = (3282-25 CPM)/ (0.201 CPM/fmol)/ (0.06798 g)/10<sup>3</sup> = 238.08 nM

nM tissue concentration (from standards) = (CPM -background)/tissue weight/ (specific activity from standards in CPM /fmol) \* 10<sup>3</sup> ml/L \* 10<sup>-6</sup> fmol/nmol = nM tissue concentration

Example: Rat 1, Olfactory bulbs = (3282-25 CPM)/ (0.164 CPM/fmol)/ (0.06798 g)/10<sup>3</sup> = 291.66 nM

## **Results**

### ***Intranasal Delivery of <sup>125</sup>I-Oxytocin***

Intranasal oxytocin successfully reaches the central nervous system with very significant concentrations in the trigeminal nerve branches and trigeminal ganglion. The trigeminal ganglion contained an average concentration of 311 nM while the three major branches, maxillary, mandibular, and ophthalmic, contained average concentrations of 264 nM, 291 nM, and 320 nM respectively (Table 01). The average concentration of olfactory bulb samples was 33 nM (Table 01). The high concentrations in these tissues confirm delivery to the brain along the olfactory and trigeminal nerve pathways. The highest delivery of oxytocin in the brain was observed in the caudate/putamen (41 nM), parietal cortex (28 nM), septal nucleus (28 nM), pons (26 nM), and medulla (25nM, Table 01). Trigeminal nerve entry into the brainstem may account for the high concentrations in the pons and medulla. The lowest concentration of oxytocin in the brain was found in the cerebellum at 10 nM (Table 01). The dorsal and ventral dura/meninges also contained high concentrations of oxytocin at 152 and 271 nM, respectively (Table 01). As the Kd for high affinity oxytocin receptors is ~1 nM and the Kd for low affinity oxytocin receptors is ~ 50 nM, this data suggests that at the dose administered, high affinity oxytocin receptors would be activated in all CNS tissues and both high and low affinity receptors would be activated in the trigeminal system. The concentration of oxytocin in the respiratory epithelium averaged 680,567 nM (Table 01) leading to effective delivery along the trigeminal nerve pathway. The average concentration of oxytocin in the upper cervical spinal cord was higher than anticipated at 33 nM (Table 01). The remaining spinal cord segments, lower cervical, thoracic, and lumbar, contained average concentrations of 4 nM, 5 nM, and 5 nM respectively (Table 02). Again, these concentrations are high enough to activate high affinity oxytocin receptors. Although our measurements were made 30 minutes after initiating intranasal treatment and 16 minutes after ending intranasal treatment, intranasal oxytocin likely reaches the trigeminal nerves within a minute or two following administration to the nasal cavity and reaches the brain within 10 minutes. Thirty minutes after initiation of intranasal delivery, the concentration of radiolabel in the blood was 61 nM (Table 01). As the half-life of oxytocin in the blood is about 10 minutes, a significant portion of this radiolabel will represent degraded oxytocin. Irrespective of the amount of degradation in the blood, the oxytocin concentration is at least five-times higher in the trigeminal ganglion than in the blood at this time.

\*Note: Rats 1, 2, and 3 were omitted from the data due to a variance in the anesthesia used. Initially, pentobarbital was selected for anesthesia but due to severe breathing problems experienced by these three animals during experimentation, the anesthesia was changed to a ketamine cocktail for animals 4 through 41.

### ***Intranasal Delivery of <sup>125</sup>I-Oxytocin with 1% Avicel ® Mucoadhesive***

The addition of a mucoadhesive to the delivery solution was investigated in attempt to increase the efficiency of intranasal delivery. Oxytocin was again successfully delivered to the brain using intranasal delivery with the addition of a mucoadhesive. The average concentration of olfactory bulb samples was 60 nM (Table 02). The trigeminal ganglion contained an average concentration of 150 nM while the three major branches, maxillary, mandibular, and ophthalmic, contained average concentrations of 340 nM, 477 nM, and 278 nM respectively (Table 02). The highest delivery of oxytocin in the brain was observed in the septal nucleus (40 nM), caudate/putamen



(39 nM), anterior olfactory nucleus (39 nM), and frontal cortex (38 nM, Table 02). High concentrations in the pons (27 nM) and medulla (27 nM) may result from close proximity to the trigeminal nerve entry in the brainstem. The lowest concentration of oxytocin in the brain was found in the thalamus at 10 nM (Table 02). Concentration of oxytocin in the respiratory epithelium averaged 817,642 nM (Table 02) leading to effective delivery along the trigeminal nerve pathway. Again, high affinity oxytocin receptors would be activated in all CNS tissues while low affinity receptors would be activated in the trigeminal system. The average concentration of oxytocin in the upper cervical spinal cord was higher than anticipated at 50 nM (Table 02). The remaining spinal cord segments, lower cervical, thoracic, and lumbar, contained average concentrations of 4 nM, 5 nM, and 4 nM respectively (Table 02). At 30 min after the onset of delivery, blood samples average 74 nM oxytocin (Table 02).

### ***Comparison of Intranasal Oxytocin and Intranasal Oxytocin with Mucoadhesive***

The addition of 1% Avicel mucoadhesive to the dosing solution did not markedly affect the tissue concentrations achieved at the 30 min sacrifice time. Systemic tissue concentrations between drug formulations remained relatively unchanged with identical concentrations found in the liver (13 nM), esophagus (25 nM), and lung (21 nM, Table 03). Despite this, the concentration of oxytocin found in the thyroid was over three times higher with the addition of mucoadhesive to the dosing solution (Table 03). The superficial and cervical nodes also exhibited a 1.5 fold increase with the addition of mucoadhesive (Table 03). Within the brain, the addition of mucoadhesive to the dosing solution caused an increase in concentration of several rostral tissues including olfactory bulbs, anterior olfactory nucleus, frontal cortex, and septal nucleus (Table 03). However, of the tissues that increased in concentration with the addition of mucoadhesive to the dosing solution, only the olfactory bulbs increased enough to reach concentrations capable of activating low affinity oxytocin receptors. In addition, the concentration of oxytocin in the trigeminal ganglion of animals receiving mucoadhesive was only half that of animals that did not receive mucoadhesive (Table 03). Both groups contained concentrations high enough to activate high affinity receptors in all CNS tissues and high enough to activate low affinity receptors in the trigeminal system. Animals receiving mucoadhesive had higher concentrations in the respiratory epithelium but lower in the olfactory epithelium when compared to animals that did not receive mucoadhesive (Table 03). This may be a result of the increased viscosity of the dosing solution containing mucoadhesive, which makes it more difficult to move all the way up past the turbinate to the olfactory epithelium at the roof of the nasal cavity. Mucoadhesive also increased oxytocin concentrations in the dorsal and ventral dura at 30 minutes (Table 03). These findings encourage studies with extended time points to investigate the advantage of mucoadhesive as a function of time.

### ***Qualitative Distribution of Oxytocin after Intranasal Delivery***

Qualitative autoradiography studies confirmed that intranasal oxytocin successfully reached the central nervous system. The distribution of oxytocin in autoradiography experiments was similar to that identified by gamma counting, with the greatest intensity in the trigeminal ganglion, olfactory bulbs, septal nucleus, and frontal cortex (Figure 01). In some cases non-symmetrical image intensity results from unequal pressure distribution on the tissues caused by the cardboard/plastic wrap when placed in the autoradiography cassette. In future studies, a thinner cardboard would be used to prevent this adverse effect and the images would be allowed to develop for a longer period of time, producing more detailed and intense images.

### ***Qualitative Distribution of Oxytocin after Intranasal Delivery with Mucoadhesive***

Qualitative autoradiography studies completed on animals receiving  $^{125}\text{I}$ -oxytocin with 1% Avicel ® mucoadhesive resulted in a similar distribution to  $^{125}\text{I}$ -oxytocin animals. The highest intensity was achieved in the trigeminal nerves, olfactory bulbs, and frontal cortex (Figure 02). Again, some non-symmetrical image intensity results from unequal pressure distribution on the tissues caused by the cardboard/plastic wrap when placed in the autoradiography cassette. The quality of autoradiography images obtained from animals receiving mucoadhesive are better than the images from animals receiving only oxytocin as the mucoadhesive samples were allowed to develop for a longer period of time, producing more detailed and intense images.

### ***Extended Time point: Intranasal Delivery at 1 h***

Due to lower than expected mortality, two animals were available to test a longer time point after intranasal administration of oxytocin with and without mucoadhesive. One rat was treated with  $^{125}\text{I}$ -oxytocin while the second rat received  $^{125}\text{I}$ -oxytocin with 1% Avicel ® mucoadhesive; both were sacrificed at 1 hr after the onset of intranasal delivery. As with the 30 minute animals, both animals had high enough concentrations to activate high affinity oxytocin receptors in all CNS tissues and high and low receptors in the trigeminal system. The animal receiving the mucoadhesive contained higher concentrations of oxytocin in the trigeminal ganglion, maxillary nerve, mandibular nerve, and ophthalmic nerve. However, with the exception of frontal cortex, the animal receiving mucoadhesive had lower brain tissue concentrations than the animal receiving only  $^{125}\text{I}$ -oxytocin (Table 04). In addition, the blood and majority of the peripheral tissues also had lower concentrations of oxytocin in the animal receiving the mucoadhesive (Table 04). This data is inconsistent with the 30 min data suggesting that mucoadhesive might increase the concentration of oxytocin reaching the trigeminal system over time. A larger sample size with multiple time points is necessary to adequately evaluate the efficacy of a mucoadhesive additive.

### ***Future Studies***

It is recommended that further quantitative studies be conducted at additional time points including 1, 2, and 5 hours both with and without Avicel mucoadhesive to learn more about the pharmacokinetics and clearance of intranasal oxytocin from the nasal epithelium, trigeminal nerves, brain, and upper spinal cord. In this new study, it is encouraged to consider measuring the concentration of oxytocin in the blood vessel walls of the internal carotid and Circle of Willis as migraine is thought to also involve the cerebrovasculature. Each new time point would consist of a group of 20 animals (10 with and 10 without mucoadhesive). The cost of carrying out these additional time points using gamma counting is estimated at \$93,832.66, or \$31,277.55 per time point.

**Table 01: Intranasal Delivery of Oxytocin Data Summary**

| Anesthesia                   | Ketamine              |                             |                             |                             |                             |                             |                             |                             |                             |                             |                             |                             |                             |                             |                             |                             |         |         |
|------------------------------|-----------------------|-----------------------------|-----------------------------|-----------------------------|-----------------------------|-----------------------------|-----------------------------|-----------------------------|-----------------------------|-----------------------------|-----------------------------|-----------------------------|-----------------------------|-----------------------------|-----------------------------|-----------------------------|---------|---------|
|                              | Ketamine              | Ketamine                    | Ketamine                    | Ketamine                    | Ketamine                    | Ketamine                    | Ketamine                    | Ketamine                    | Ketamine                    | Ketamine                    | Ketamine                    | Ketamine                    | Ketamine                    | Ketamine                    | Ketamine                    | Ketamine                    |         |         |
| mg oxytocin delivered        | 0.39                  | 0.40                        | 0.40                        | 0.40                        | 0.40                        | 0.40                        | 0.40                        | 0.40                        | 0.40                        | 0.40                        | 0.40                        | 0.40                        | 0.40                        | 0.40                        | 0.40                        | 0.40                        |         |         |
| nmol oxytocin delivered      | 387.94                | 397.15                      | 397.15                      | 397.15                      | 397.14                      | 397.14                      | 396.90                      | 397.22                      | 397.22                      | 397.27                      | 397.27                      | 397.27                      | 397.10                      | 397.19                      | 397.17                      | 397.16                      |         |         |
| uCl delivered                | 44.0                  | 45.0                        | 45.0                        | 45.0                        | 45.0                        | 45.0                        | 45.0                        | 45.0                        | 45.0                        | 45.0                        | 45.0                        | 45.0                        | 45.0                        | 45.0                        | 45.0                        | 45.0                        |         |         |
| uL delivered                 | 48.0                  | 49.1                        | 49.4                        | 49.4                        | 49.9                        | 49.9                        | 51.0                        | 51.9                        | 51.9                        | 53.1                        | 53.1                        | 47.7                        | 47.7                        | 48.2                        | 48.2                        | 50.0                        |         |         |
| Delivery time                | 14:00                 | 14:02                       | 14:03                       | 14:02                       | 14:01                       | 14:12                       | 14:01                       | 14:09                       | 14:02                       | 14:00                       | 14:00                       | 14:00                       | 14:05                       | 14:00                       | 14:07                       | 14:00                       |         |         |
| Sac time                     | 32:02                 | 32:00                       | 30:57                       | 30:55                       | 31:06                       | 30:57                       | 30:56                       | 30:59                       | 31:04                       | 30:50                       | 31:19                       | 32:43                       | 31:14                       | 31:25                       | 30:50                       | 30:44                       |         |         |
| Notes                        | No breathing problems | Steady breathing throughout | Steady breathing throughout | Steady breathing throughout | Steady breathing throughout | Steady breathing throughout | Steady breathing throughout | Steady breathing throughout | Steady breathing throughout | Steady breathing throughout | Steady breathing throughout | Steady breathing throughout | Steady breathing throughout | Steady breathing throughout | Steady breathing throughout | Steady breathing throughout |         |         |
|                              | Mean                  | SE                          | Rat 4                       | Rat 5                       | Rat 6                       | Rat 7                       | Rat 8                       | Rat 9                       | Rat 10                      | Rat 12                      | Rat 13                      | Rat 14                      | Rat 15                      | Rat 17                      | Rat 18                      | Rat 19                      | Rat 40  |         |
| Tissue Description           | nM                    | nM                          | nM                          | nM                          | nM                          | nM                          | nM                          | nM                          | nM                          | nM                          | nM                          | nM                          | nM                          | nM                          | nM                          | nM                          | nM      |         |
| Blood Sample (30:00)         | 61 ±4.1               |                             | 55                          | 93                          | 84                          | 56                          | 63                          | 36                          | 55                          | 38                          | 41                          | 68                          | 74                          | 72                          | 62                          | 73                          | 66      | 45      |
| Respiratory Epithelium       | 680567 ±85020.5       |                             | 771077                      | 928050                      | 975234                      | 423808                      | 203670                      | 180350                      | 1104447                     | 506223                      | 536609                      | 1203130                     | 400752                      | 848976                      | 977456                      | 912785                      | 761200  | 155305  |
| Olfactory Epithelium         | 4112 ±693.7           |                             | 7488                        | X                           | X                           | X                           | 4059                        | 2399                        | 3710                        | X                           | X                           | 6935                        | 6785                        | 1627                        | 3681                        | 2515                        | 1923    | X       |
| Trigeminal Ganglion          | 311 ±79.0             |                             | 690                         | X                           | 354                         | 284                         | 90                          | X                           | -                           | -                           | -                           | -                           | -                           | -                           | -                           | 60                          | 369     | 328     |
| Maxillary Nerve              | 264 ±46.2             |                             | 499                         | X                           | X                           | 350                         | 134                         | X                           | 116                         | 475                         | 563                         | 229                         | 78                          | 85                          | 317                         | 120                         | 188     | 277     |
| Mandibular Nerve             | 291 ±37.5             |                             | 243                         | X                           | 330                         | X                           | X                           | X                           | 123                         | X                           | 485                         | 172                         | 187                         | 178                         | 349                         | 260                         | 432     | 444     |
| Ophthalmic Nerve             | 320 ±57.7             |                             | 194                         | 362                         | 130                         | 534                         | X                           | X                           | 46                          | 682                         | 306                         | 78                          | 146                         | 506                         | 201                         | 145                         | 612     | 534     |
| Olfactory Bulbs              | 33 ±12.7              |                             | 20                          | 7                           | 38                          | 93                          | X                           | X                           | -                           | -                           | -                           | -                           | -                           | -                           | -                           | 20                          | 19      | X       |
| Anterior Olfactory Nucleus   | 24 ±4.6               |                             | 19                          | 32                          | 18                          | 39                          | X                           | 46                          | -                           | -                           | -                           | -                           | -                           | -                           | -                           | 8                           | 19      | 15      |
| Frontal Cortex               | 21 ±3.8               |                             | 22                          | 26                          | 18                          | 40                          | X                           | X                           | -                           | -                           | -                           | -                           | -                           | -                           | -                           | 16                          | 10      | 14      |
| Caudate/Putamen              | 41 ±10.8              |                             | 44                          | 71                          | 27                          | 108                         | 15                          | 26                          | -                           | -                           | -                           | -                           | -                           | -                           | -                           | 10                          | 13      | 54      |
| Septal Nucleus               | 28 ±6.5               |                             | 19                          | 27                          | 29                          | 62                          | 27                          | 16                          | -                           | -                           | -                           | -                           | -                           | -                           | -                           | 9                           | 6       | 57      |
| Parietal Cortex              | 28 ±6.8               |                             | 12                          | 37                          | 12                          | 64                          | 54                          | 32                          | -                           | -                           | -                           | -                           | -                           | -                           | -                           | 10                          | 13      | 17      |
| Hippocampus                  | 16 ±3.0               |                             | 7                           | 11                          | 16                          | 31                          | 28                          | 9                           | -                           | -                           | -                           | -                           | -                           | -                           | -                           | 6                           | 14      | 17      |
| Thalamus                     | 15 ±5.6               |                             | 7                           | 12                          | 9                           | 8                           | 59                          | 7                           | -                           | -                           | -                           | -                           | -                           | -                           | -                           | 5                           | 13      | 12      |
| Hypothalamus                 | 21 ±3.9               |                             | 10                          | 37                          | 23                          | 29                          | X                           | 23                          | -                           | -                           | -                           | -                           | -                           | -                           | -                           | 8                           | 18      | X       |
| Midbrain                     | 14 ±2.7               |                             | 8                           | 19                          | 12                          | 13                          | X                           | 9                           | -                           | -                           | -                           | -                           | -                           | -                           | -                           | 6                           | 12      | 30      |
| Pons                         | 26 ±9.6               |                             | 12                          | 24                          | 13                          | 25                          | 100                         | 9                           | -                           | -                           | -                           | -                           | -                           | -                           | -                           | 6                           | 14      | 26      |
| Medulla                      | 25 ±8.8               |                             | 14                          | 22                          | 12                          | 43                          | 90                          | 9                           | -                           | -                           | -                           | -                           | -                           | -                           | -                           | 7                           | 15      | 17      |
| Cerebellum                   | 10 ±1.4               |                             | 11                          | X                           | 12                          | 17                          | X                           | 9                           | -                           | -                           | -                           | -                           | -                           | -                           | -                           | 5                           | 8       | 10      |
| Dorsal Dura                  | 152 ±11.6             |                             | 134                         | X                           | X                           | X                           | X                           | 58                          | 168                         | X                           | 190                         | 128                         | 155                         | 201                         | 142                         | 177                         | 172     | 154     |
| Ventral Dura                 | 271 ±43.4             |                             | 218                         | 388                         | 326                         | X                           | 235                         | 51                          | 136                         | 591                         | 495                         | 518                         | 208                         | 350                         | 188                         | 103                         | 64      | 193     |
| Spinal Dura                  | 31 ±7.9               |                             | 22                          | 20                          | 14                          | 28                          | 46                          | 127                         | 14                          | 16                          | 17                          | 43                          | 34                          | 29                          | 19                          | 10                          | X       | X       |
| Upper Cervical Spinal Cord   | 33 ±7.5               |                             | 14                          | 65                          | 35                          | X                           | 65                          | 19                          | -                           | -                           | -                           | -                           | -                           | -                           | -                           | 11                          | 26      | 26      |
| Lower Cervical Spinal Cord   | 4 ±0.3                |                             | 4                           | 4                           | 5                           | 5                           | 5                           | 4                           | 4                           | 4                           | 3                           | 4                           | X                           | X                           | 3                           | 5                           | 6       | 2       |
| Thoracic Spinal Cord         | 5 ±0.5                |                             | 5                           | 6                           | 5                           | X                           | 7                           | X                           | 3                           | 4                           | 3                           | 5                           | X                           | 4                           | 3                           | 4                           | X       | 8       |
| Lumbar Spinal Cord           | 5 ±0.6                |                             | 5                           | 5                           | 4                           | X                           | X                           | X                           | 3                           | 2                           | 2                           | 4                           | 7                           | 5                           | X                           | 3                           | 9       | 6       |
| Superficial Nodes (2)        | 232 ±25.3             |                             | 144                         | X                           | X                           | X                           | 99                          | 157                         | 333                         | 276                         | 401                         | 335                         | 240                         | 236                         | 110                         | 212                         | 267     | 207     |
| Cervical Nodes (2)           | 213 ±35.5             |                             | 214                         | 126                         | X                           | X                           | 159                         | 294                         | 110                         | 452                         | 306                         | 277                         | 123                         | 95                          | 494                         | 134                         | 116     | 88      |
| Axillary Nodes (2)           | 22 ±2.1               |                             | 18                          | 25                          | 18                          | 21                          | 42                          | 24                          | 12                          | 12                          | 21                          | 29                          | 20                          | X                           | 20                          | 14                          | 33      | 18      |
| Thyroid                      | 213 ±35.5             |                             | 214                         | 126                         | X                           | X                           | 159                         | 294                         | 110                         | 452                         | 306                         | 277                         | 123                         | 95                          | 494                         | 134                         | 116     | 88      |
| Muscle (R, deltoid)          | 14 ±1.2               |                             | 9                           | 15                          | 17                          | 11                          | 22                          | 19                          | 7                           | 10                          | 10                          | 14                          | X                           | X                           | 12                          | 10                          | 21      | 16      |
| Liver (R, superficial lobe)  | 13 ±1.3               |                             | 15                          | X                           | 23                          | 17                          | 18                          | 20                          | 7                           | 12                          | 9                           | 11                          | X                           | 14                          | 10                          | 13                          | 11      | 6       |
| Kidney (L, tip)              | 44 ±3.0               |                             | 38                          | 47                          | 64                          | 48                          | 59                          | 25                          | 37                          | 35                          | 52                          | X                           | X                           | 46                          | 38                          | 35                          | 54      | 33      |
| Lung (R, top lobe)           | 21 ±2.4               |                             | 33                          | 17                          | 19                          | 33                          | 20                          | 12                          | 26                          | 11                          | 14                          | 12                          | 41                          | 23                          | 8                           | 19                          | 31      | 12      |
| Trachea (near cut-off)       | 26 ±3.2               |                             | 16                          | 40                          | 31                          | 31                          | 52                          | 22                          | 16                          | 10                          | 13                          | 34                          | 40                          | 22                          | 14                          | 36                          | 26      | 9       |
| Esophagus (near cut-off)     | 25 ±2.0               |                             | 13                          | X                           | 30                          | 21                          | 31                          | 21                          | 13                          | 17                          | 34                          | 35                          | 19                          | 24                          | 18                          | 32                          | 25      | 35      |
| Spleen (tip)                 | 23 ±2.1               |                             | 15                          | 39                          | 37                          | 19                          | 28                          | 24                          | 13                          | 17                          | 15                          | 29                          | 30                          | 20                          | 11                          | 24                          | 15      | 27      |
| Heart                        | 16 ±1.2               |                             | 20                          | 22                          | 16                          | 18                          | X                           | 23                          | 13                          | 11                          | 12                          | 19                          | X                           | 16                          | 22                          | 13                          | 13      | 9       |
| Urine (fill to line of tube) | 73 ±11.2              |                             | 15                          | 34                          | 121                         | 24                          | 97                          | 46                          | 134                         | 67                          | 44                          | 99                          | 146                         | X                           | 50                          | 124                         | 57      | 36      |
| Drug Standard                |                       |                             | 8283744                     | 8283744                     | 7849263                     | 7849263                     | 8423547                     | 8423547                     | 8969882                     | 8113623                     | 8113623                     | 7961561                     | 7961561                     | 10061372                    | 10061372                    | 8464974                     | 8486112 | 7443003 |
| Drug Standard                | 8788619 ±122341       |                             | 8558332                     | 8558332                     | 8253577                     | 8253577                     | 9289377                     | 9289377                     | 9065938                     | 7847807                     | 7847807                     | 8669004                     | 8669004                     | 9990586                     | 9990586                     | 9782016                     | 9768403 | 7172863 |
| Drug Standard                |                       |                             | 9947728                     | 9947728                     | 9061085                     | 9061085                     | 7579119                     | 7579119                     | 10091400                    | 9793279                     | 9793279                     | 8105591                     | 8105591                     | 9709856                     | 9709856                     | 8909867                     | 8899521 | 9802843 |
| CPM/fmol                     | 0.17 ±0.0             |                             | 0.16                        | 0.16                        | 0.16                        | 0.16                        | 0.17                        | 0.17                        | 0.16                        | 0.16                        | 0.16                        | 0.16                        | 0.16                        | 0.17                        | 0.17                        | 0.18                        | 0.18    | 0.16    |

AUTORADIOGRAPHY

**Table 02: Intranasal Delivery of Oxytocin with 1% Mucoadhesive Data Summary**

| Anesthesia                          | Ketamine       |         |                                  |          |                                               |         |         |          |         |         |         |                 |         |         |         |         |         |  |  |  |
|-------------------------------------|----------------|---------|----------------------------------|----------|-----------------------------------------------|---------|---------|----------|---------|---------|---------|-----------------|---------|---------|---------|---------|---------|--|--|--|
|                                     | 0.4            | 0.4     | 0.4                              | 0.4      | 0.4                                           | 0.4     | 0.4     | 0.4      | 0.4     | 0.4     | 0.4     | 0.4             | 0.4     | 0.4     | 0.4     | 0.4     |         |  |  |  |
| mg oxytocin delivered               | 397.1          | 397.1   | 397.2                            | 397.2    | 397.2                                         | 397.1   | 397.2   | 397.2    | 397.2   | 397.1   | 397.1   | 397.1           | 397.1   | 397.1   | 397.2   | 397.2   |         |  |  |  |
| nmol oxytocin delivered             | 45.0           | 45.0    | 45.0                             | 45.0     | 45.0                                          | 45.0    | 45.0    | 45.0     | 45.0    | 45.0    | 45.0    | 45.0            | 45.0    | 45.0    | 45.0    | 45.0    |         |  |  |  |
| uCi delivered                       | 49.2           | 49.2    | 49.5                             | 49.5     | 50.0                                          | 51.1    | 51.4    | 51.4     | 51.4    | 47.5    | 47.7    | 47.7            | 49.2    | 49.2    | 49.5    | 49.5    |         |  |  |  |
| uL delivered                        | 14:00          | 14:09   | 14:01                            | 14:00    | 14:02                                         | 14:00   | 14:00   | 14:00    | 14:00   | 14:00   | 14:00   | 14:00           | 14:00   | 14:00   | 14:00   | 14:00   |         |  |  |  |
| Delivery time                       | 30:48          | 30:15   | 30:54                            | 31:00    | 30:43                                         | 30:44   | 30:45   | 30:40    | 30:39   | 31:07   | 30:20   | 30:49           | 30:43   | 30:45   | 30:02   | 31:49   |         |  |  |  |
| Sac time                            | Notes          |         | IN Oxytocin with 1% Mucoadhesive |          | 1% Avicel Mucoadhesive: No breathing problems |         |         |          |         |         |         |                 |         |         |         |         |         |  |  |  |
| Mean                                | SE             | Rat 20  | Rat 21                           | Rat 22   | Rat 23                                        | Rat 25  | Rat 27  | Rat 28   | Rat 29  | Rat 32  | Rat 33  | Rat 34          | Rat 35  | Rat 36  | Rat 37  | Rat 38  | Rat 39  |  |  |  |
| nM                                  | nM             | nM      | nM                               | nM       | nM                                            | nM      | nM      | nM       | nM      | nM      | nM      | nM              | nM      | nM      | nM      | nM      | nM      |  |  |  |
| <b>Tissue Description</b>           |                |         |                                  |          |                                               |         |         |          |         |         |         |                 |         |         |         |         |         |  |  |  |
| <b>Blood Sample (30:00)</b>         | 74 ±6          | 70      | 45                               | 104      | 119                                           | 123     | 90      | 85       | 78      | 58      | 63      | 57              | 73      | 72      | 48      | 44      | 61      |  |  |  |
| <b>Respiratory Epithelium</b>       | 817642 ±41406  | 936476  | 841821                           | 728714   | 967799                                        | 652956  | 1070178 | 803631   | X       | 680313  | 857355  | X               | 1026380 | 598624  | 594804  | 923860  | 764083  |  |  |  |
| <b>Olfactory Epithelium</b>         | 3153 ±432      | 2047    | 4886                             | 5341     | 3915                                          | X       | 1897    | 3148     | X       | 4506    | 1613    | X               | 3938    | X       | 2057    | 1335    | X       |  |  |  |
| <b>Trigeminal Ganglion</b>          | 150 ±38        | 216     | 317                              | -        | -                                             | X       | 134     | -        | -       | 50      | 79      | -               | -       | -       | -       | 52      | 199     |  |  |  |
| <b>Maxillary Nerve</b>              | 340 ±50        | 556     | 314                              | 632      | X                                             | 440     | 91      | 566      | 296     | 139     | 336     | X               | 310     | 227     | 109     | 159     | 583     |  |  |  |
| <b>Mandibular Nerve</b>             | 477 ±117       | 472     | 499                              | 375      | 117                                           | 518     | 1422    | 274      | X       | 117     | 119     | 1158            | 121     | 1112    | 215     | 160     | X       |  |  |  |
| <b>Ophthalmic Nerve</b>             | 278 ±51        | X       | 200                              | 342      | X                                             | 408     | 579     | 164      | 379     | 115     | X       | 554             | 47      | 258     | 181     | 105     | X       |  |  |  |
| <b>Olfactory Bulbs</b>              | 60 ±15         | 55      | 27                               | -        | -                                             | X       | 23      | -        | -       | 125     | 61      | -               | -       | -       | -       | 70      | X       |  |  |  |
| <b>Anterior Olfactory Nucleus</b>   | 39 ±9          | 21      | 12                               | -        | -                                             | 69      | 11      | -        | -       | 38      | 77      | -               | -       | -       | -       | 30      | 58      |  |  |  |
| <b>Frontal Cortex</b>               | 38 ±10         | 19      | 25                               | -        | -                                             | X       | 10      | -        | -       | 26      | 62      | -               | -       | -       | -       | 43      | 82      |  |  |  |
| <b>Caudate/Putamen</b>              | 39 ±12         | 15      | 16                               | -        | -                                             | 85      | 17      | -        | -       | X       | 34      | -               | -       | -       | -       | 22      | 84      |  |  |  |
| <b>Septal Nucleus</b>               | 40 ±13         | 21      | 10                               | -        | -                                             | 25      | 9       | -        | -       | 32      | 23      | -               | -       | -       | -       | 94      | 104     |  |  |  |
| <b>Parietal Cortex</b>              | 29 ±4          | 11      | 27                               | -        | -                                             | 45      | X       | -        | -       | 31      | 28      | -               | -       | -       | -       | 22      | 41      |  |  |  |
| <b>Hippocampus</b>                  | 21 ±5          | 9       | X                                | AUTORAD. | -                                             | X       | 8       | AUTORAD. | -       | 34      | 13      | AUTORADIOGRAPHY | -       | -       | -       | 26      | 36      |  |  |  |
| <b>Thalamus</b>                     | 10 ±1          | 11      | X                                | -        | -                                             | 11      | 10      | -        | -       | 12      | 4       | -               | -       | -       | -       | 10      | 11      |  |  |  |
| <b>Hypothalamus</b>                 | 30 ±4          | 38      | 24                               | -        | -                                             | 30      | 48      | -        | -       | X       | 14      | -               | -       | -       | -       | 20      | 38      |  |  |  |
| <b>Midbrain</b>                     | 17 ±4          | 20      | 14                               | -        | -                                             | 28      | 7       | -        | -       | 8       | 7       | -               | -       | -       | -       | X       | 36      |  |  |  |
| <b>Pons</b>                         | 27 ±6          | 14      | 8                                | -        | -                                             | X       | 45      | -        | -       | 49      | 12      | -               | -       | -       | -       | 25      | 36      |  |  |  |
| <b>Medulla</b>                      | 27 ±7          | 16      | 12                               | -        | -                                             | 48      | 18      | -        | -       | 9       | 12      | -               | -       | -       | -       | 52      | 50      |  |  |  |
| <b>Cerebellum</b>                   | 16 ±2          | 11      | 20                               | -        | -                                             | 23      | 9       | -        | -       | 13      | 8       | -               | -       | -       | -       | 19      | 24      |  |  |  |
| <b>Dorsal Dura</b>                  | 395 ±78        | X       | 144                              | X        | 513                                           | X       | X       | 662      | 179     | 548     | 784     | X               | 53      | 675     | 107     | 255     | 426     |  |  |  |
| <b>Ventral Dura</b>                 | 992 ±235       | 193     | 473                              | 230      | 1414                                          | 2135    | 55      | 524      | 2783    | 507     | 1718    | 2809            | 63      | 662     | 55      | 1266    | 984     |  |  |  |
| <b>Spinal Dura</b>                  | 15 ±2          | 10      | 8                                | 24       | 13                                            | 26      | 13      | 16       | 21      | 8       | 11      | 15              | 19      | X       | X       | X       | X       |  |  |  |
| <b>Upper Cervical Spinal Cord</b>   | 50 ±15         | 36      | 15                               | -        | -                                             | 116     | 36      | -        | -       | 8       | 95      | -               | -       | -       | -       | 40      | X       |  |  |  |
| <b>Lower Cervical Spinal Cord</b>   | 4 ±0           | 6       | 5                                | 4        | 5                                             | 5       | 3       | 7        | 1       | 4       | 5       | 4               | 5       | X       | X       | 3       | X       |  |  |  |
| <b>Thoracic Spinal Cord</b>         | 5 ±0           | 5       | 4                                | 6        | 5                                             | 5       | 5       | X        | 5       | 4       | 5       | 6               | 6       | 5       | X       | 5       | X       |  |  |  |
| <b>Lumbar Spinal Cord</b>           | 4 ±0.3         | 3       | 3                                | 4        | 5                                             | X       | 3       | 6        | 5       | 4       | 4       | X               | X       | 5       | 3       | 3       | X       |  |  |  |
| <b>Superficial Nodes (2)</b>        | 365 ±44        | 258     | 232                              | 486      | 629                                           | 580     | 183     | 554      | 487     | 219     | 418     | X               | 117     | 492     | 398     | 297     | 125     |  |  |  |
| <b>Cervical Nodes (2)</b>           | 398 ±80        | 415     | 243                              | 183      | X                                             | 812     | 193     | 586      | 505     | 209     | 130     | 222             | 858     | X       | 121     | 131     | 967     |  |  |  |
| <b>Axillary Nodes (2)</b>           | 19 ±1.8        | 19      | 18                               | 15       | X                                             | 17      | X       | 21       | 32      | 12      | 33      | 18              | X       | 19      | 13      | 14      | 17      |  |  |  |
| <b>Thyroid</b>                      | 739 ±110       | 412     | 378                              | 701      | 674                                           | X       | 1828    | 645      | X       | 641     | 716     | 1042            | 649     | 1109    | 376     | 442     | X       |  |  |  |
| <b>Muscle (R, deltoid)</b>          | 13 ±1          | 14      | 11                               | 9        | 18                                            | 15      | 15      | 16       | 19      | X       | 12      | 18              | X       | 11      | 6       | 10      | 10      |  |  |  |
| <b>Liver (R, superficial lobe)</b>  | 13 ±1.1        | 20      | 17                               | 9        | 17                                            | X       | 13      | 15       | 18      | 7       | 13      | 10              | 11      | 6       | 11      | 7       | 16      |  |  |  |
| <b>Kidney (L, tip)</b>              | 53 ±6          | 73      | 58                               | 76       | 72                                            | 90      | 14      | X        | 52      | 59      | 45      | 41              | 72      | 42      | 17      | 45      | 34      |  |  |  |
| <b>Lung (R, top lobe)</b>           | 21 ±2          | 34      | 17                               | 26       | X                                             | 10      | 18      | 36       | 12      | 36      | 23      | 15              | 21      | 13      | 15      | 18      | 14      |  |  |  |
| <b>Trachea (near cut-off)</b>       | 24 ±2          | 21      | 15                               | X        | 23                                            | 26      | 31      | 41       | 41      | 33      | 22      | 26              | 24      | 26      | 13      | 14      | 9       |  |  |  |
| <b>Esophagus (near cut-off)</b>     | 25 ±1.6        | 31      | 14                               | 21       | 23                                            | 36      | 23      | 28       | X       | 22      | 29      | 36              | 20      | 23      | 27      | 22      | 23      |  |  |  |
| <b>Spleen (tip)</b>                 | 22 ±1.6        | 28      | 16                               | X        | 28                                            | 25      | X       | 33       | 18      | 13      | 21      | 14              | 15      | 20      | 25      | 20      | 26      |  |  |  |
| <b>Heart</b>                        | 14 ±1          | 21      | 11                               | 16       | 15                                            | 11      | 12      | 13       | 15      | 13      | 16      | 11              | 22      | 14      | 9       | 10      | 22      |  |  |  |
| <b>Urine (fill to line of tube)</b> | 72 ±12         | 143     | 69                               | 145      | 101                                           | X       | 96      | 120      | X       | 23      | 82      | 89              | 8       | 33      | 23      | 36      | 42      |  |  |  |
| <b>Drug Standard</b>                |                | 9705188 | 9705188                          | 9213637  | 9213637                                       | 8216111 | 8790444 | 9294890  | 9294890 | 8272417 | 8312553 | 9292479         | 9292479 | 9858107 | 9858107 | 8848929 | 8848929 |  |  |  |
| <b>Drug Standard</b>                | 9160899 ±78596 | 9084920 | 9084920                          | 9665191  | 9665191                                       | 9339034 | 9475008 | 8517540  | 8517540 | 8561349 | 8534454 | 9263366         | 9263366 | 8025998 | 8025998 | 9714674 | 9714674 |  |  |  |
| <b>Drug Standard</b>                |                | 8294524 | 8294524                          | 10158390 | 10158390                                      | 9553041 | X       | 9421429  | 9421429 | 9957771 | 9941373 | 8171569         | 8171569 | 9454884 | 9454884 | 9818639 | 9818639 |  |  |  |
| <b>CPM/fmol</b>                     | 0.17 ±0.0      | 0.18    | 0.18                             | 0.17     | 0.17                                          | 0.16    | 0.17    | 0.17     | 0.17    | 0.16    | 0.16    | 0.16            | 0.16    | 0.15    | 0.15    | 0.17    | 0.17    |  |  |  |

**Table 03: Intranasal Oxytocin vs. Intranasal Oxytocin with 1% Mucoadhesive**

| Tissue Description           | IN Oxytocin |         | IN Oxytocin with 1% Avicel |        |
|------------------------------|-------------|---------|----------------------------|--------|
|                              | Mean        | SE      | Mean                       | SE     |
|                              | nM          |         | nM                         |        |
| Blood Sample (30:00)         | 61          | ±4      | 74                         | ±6     |
| Respiratory Epithelium       | 680,567     | 85,021  | 817,642                    | 41,406 |
| Olfactory Epithelium         | 4112        | ±694    | 3153                       | ±432   |
| Trigeminal Ganglion          | 311         | ±79     | 150                        | ±38    |
| Maxillary Nerve              | 264         | ±46     | 340                        | ±50    |
| Mandibular Nerve             | 291         | ±38     | 477                        | ±117   |
| Ophthalmic Nerve             | 320         | ±58     | 278                        | ±51    |
| Olfactory Bulbs              | 33          | ±13     | 60                         | ±15    |
| Anterior Olfactory Nucleus   | 24          | ±5      | 39                         | ±9     |
| Frontal Cortex               | 21          | ±4      | 38                         | ±10    |
| Caudate/Putamen              | 41          | ±10.8   | 39                         | ±12.0  |
| Septal Nucleus               | 28          | ±6      | 40                         | ±13    |
| Parietal Cortex              | 28          | ±7      | 29                         | ±4     |
| Hippocampus                  | 16          | ±3      | 21                         | ±5     |
| Thalamus                     | 15          | ±6      | 10                         | ±1     |
| Hypothalamus                 | 21          | ±4      | 30                         | ±4     |
| Midbrain                     | 14          | ±3      | 17                         | ±4     |
| Pons                         | 26          | ±10     | 27                         | ±6     |
| Medulla                      | 25          | ±9      | 27                         | ±7     |
| Cerebellum                   | 10          | ±1      | 16                         | ±2     |
| Dorsal Dura                  | 152         | ±12     | 395                        | ±78    |
| Ventral Dura                 | 271         | ±43     | 992                        | ±235   |
| Spinal Dura                  | 31          | ±8      | 15                         | ±2     |
| Upper Cervical Spinal Cord   | 33          | ±8      | 50                         | ±15    |
| Lower Cervical Spinal Cord   | 4           | ±0.3    | 4                          | ±0.4   |
| Thoracic Spinal Cord         | 5           | ±0.5    | 5                          | ±0.2   |
| Lumbar Spinal Cord           | 5           | ±0.6    | 4                          | ±0.3   |
| Superficial Nodes (2)        | 232         | ±25     | 365                        | ±44    |
| Cervical Nodes (2)           | 213         | ±36     | 398                        | ±80    |
| Axillary Nodes (2)           | 22          | ±2      | 19                         | ±2     |
| Thyroid                      | 213         | ±36     | 739                        | ±110   |
| Muscle (R, deltoid)          | 14          | ±1      | 13                         | ±1     |
| Liver (R, superficial lobe)  | 13          | ±1      | 13                         | ±1     |
| Kidney (L, tip)              | 44          | ±3      | 53                         | ±6     |
| Lung (R, top lobe)           | 21          | ±2      | 21                         | ±2     |
| Trachea (near cut-off)       | 26          | ±3      | 24                         | ±2     |
| Esophagus (near cut-off)     | 25          | ±2      | 25                         | ±2     |
| Spleen (tip)                 | 23          | ±2      | 22                         | ±2     |
| Heart                        | 16          | ±1      | 14                         | ±1     |
| Urine (fill to line of tube) | 73          | ±11     | 72                         | ±12    |
| Drug Standard                | 8,788,619   | 122,341 | 9,160,899                  | 78,596 |
| CPM/fmol                     | 0.17        | ±0.0    | 0.17                       | ±0.0   |

**Table 04: Extended Time Point, Intranasal Oxytoin vs. Intranasal Oxytocin with 1% Mucoadhesive at 60 min.**

| Tissue Description           | Rat 30: IN Oxytocin | Rat 31: IN Oxytocin with 1% Mucoadhesive |
|------------------------------|---------------------|------------------------------------------|
|                              | Mean nM             | Mean nM                                  |
| Blood Sample (60:00)         | 155                 | 103                                      |
| Respiratory Epithelium       | 1,075,273           | 1,078,689                                |
| Olfactory Epithelium         | 100,193             | 9,839                                    |
| Trigeminal Ganglion          | 301                 | 1106                                     |
| Maxillary Nerve              | 163                 | 538                                      |
| Mandibular Nerve             | 201                 | 346                                      |
| Ophthalmic Nerve             | 209                 | 462                                      |
| Olfactory Bulbs              | 80                  | 17                                       |
| Anterior Olfactory Nucleus   | 42                  | 12                                       |
| Frontal Cortex               | 25                  | 66                                       |
| Caudate/Putamen              | 31                  | 24                                       |
| Septal Nucleus               | 24                  | 15                                       |
| Parietal Cortex              | 14                  | 12                                       |
| Hippocampus                  | 16                  | 13                                       |
| Thalamus                     | 11                  | 7                                        |
| Hypothalamus                 | 26                  | 23                                       |
| Midbrain                     | 20                  | 12                                       |
| Pons                         | 42                  | 16                                       |
| Medulla                      | 37                  | 12                                       |
| Cerebellum                   | 27                  | 14                                       |
| Dorsal Dura                  | 364                 | 232                                      |
| Ventral Dura                 | 565                 | 7168                                     |
| Spinal Dura                  | 26                  | 10                                       |
| Upper Cervical Spinal Cord   | 18                  | 26                                       |
| Lower Cervical Spinal Cord   | 10                  | 5                                        |
| Thoracic Spinal Cord         | 11                  | 7                                        |
| Lumbar Spinal Cord           | 18                  | 6                                        |
| Superficial Nodes (2)        | 109                 | 192                                      |
| Cervical Nodes (2)           | 381                 | 446                                      |
| Axillary Nodes (2)           | 51                  | 30                                       |
| Thyroid                      | 2,882               | 3,925                                    |
| Muscle (R, deltoid)          | 36                  | 28                                       |
| Liver (R, superficial lobe)  | 22                  | 39                                       |
| Kidney (L, tip)              | 166                 | 56                                       |
| Lung (R, top lobe)           | 56                  | 22                                       |
| Trachea (near cut-off)       | 105                 | 79                                       |
| Esophagus (near cut-off)     | 59                  | 126                                      |
| Spleen (tip)                 | 68                  | 48                                       |
| Heart                        | 35                  | 30                                       |
| Urine (fill to line of tube) | 676                 | 103                                      |
| Drug Standard                | 3,995,562           | 4,029,771                                |
| CPM/fmol                     | 0.17                | 0.16                                     |

**Figure 01: Qualitative Distribution after Intranasal Delivery of  $^{125}\text{I}$ -Oxytocin**

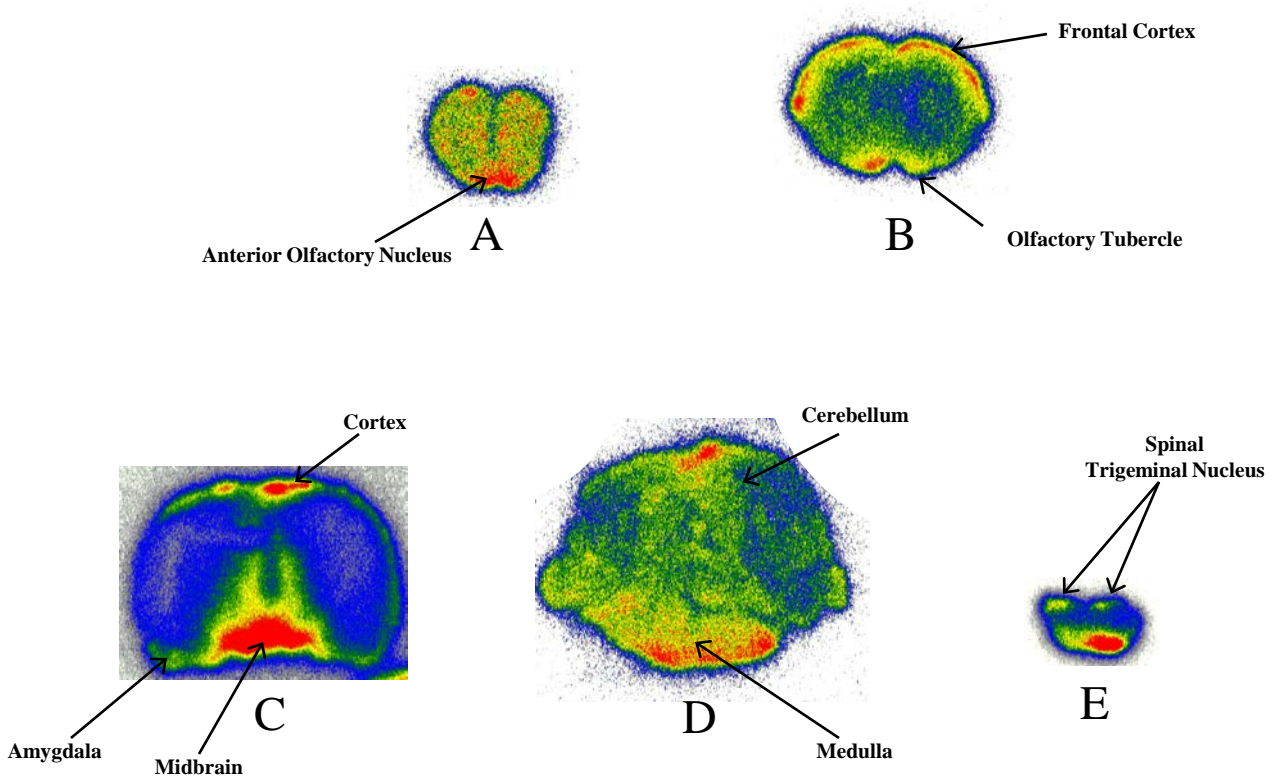

A) Rat 16, slice +6. Image intensity: 400-1167.

B) Rat 12, slice +3. Image intensity: 312-1411.

C) Rat 11, slice -7. Image intensity: 115-1824.

D) Rat 14, slice -12. Image intensity: 277-1040.

E) Rat 13, slice -19. Image intensity: 359-2151.

\*Slices were measured from Bregma.

\*\*All images were exported at 200% magnification and displayed at 20%.

**Figure 02: Qualitative Distribution after Intranasal  $^{125}\text{I}$ -Oxytocin with 1% Avicel Mucoadhesive**

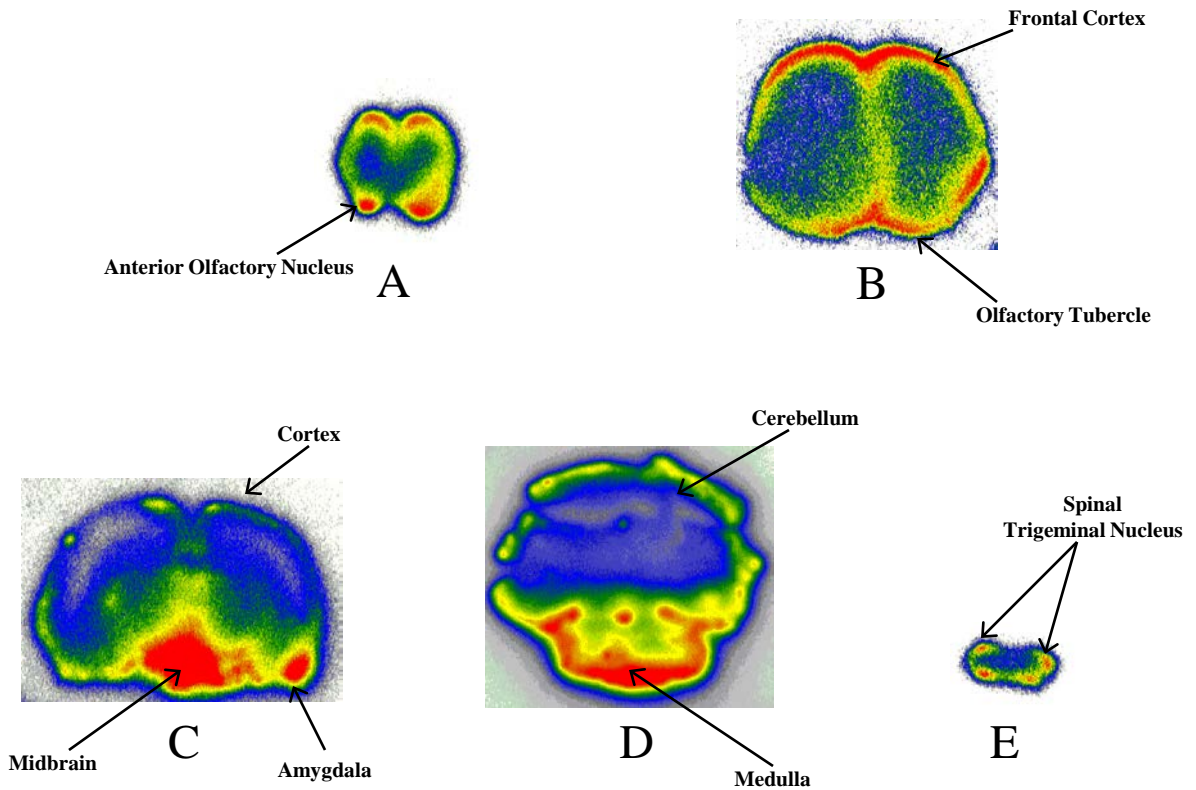

A) Rat 29, slice +7. Image intensity: 492-3,287.

B) Rat 29, slice +3. Image intensity: 331-1,140.

C) Rat 23, slice -7. Image intensity: 413-3,432.

D) Rat 28, slice -13. Image intensity: 0-25,757.

E) Rat 29, slice -18. Image intensity: 648-2,201.

\*Slices were measured from Bregma.

\*\*All images were exported at 200% magnification and displayed at 20%.



**Figure 03: Trigeminal Ganglion of Animals Receiving  $^{125}\text{I}$ -Oxytocin and  $^{125}\text{I}$ -Oxytocin with 1% Avicel Mucoadhesive**

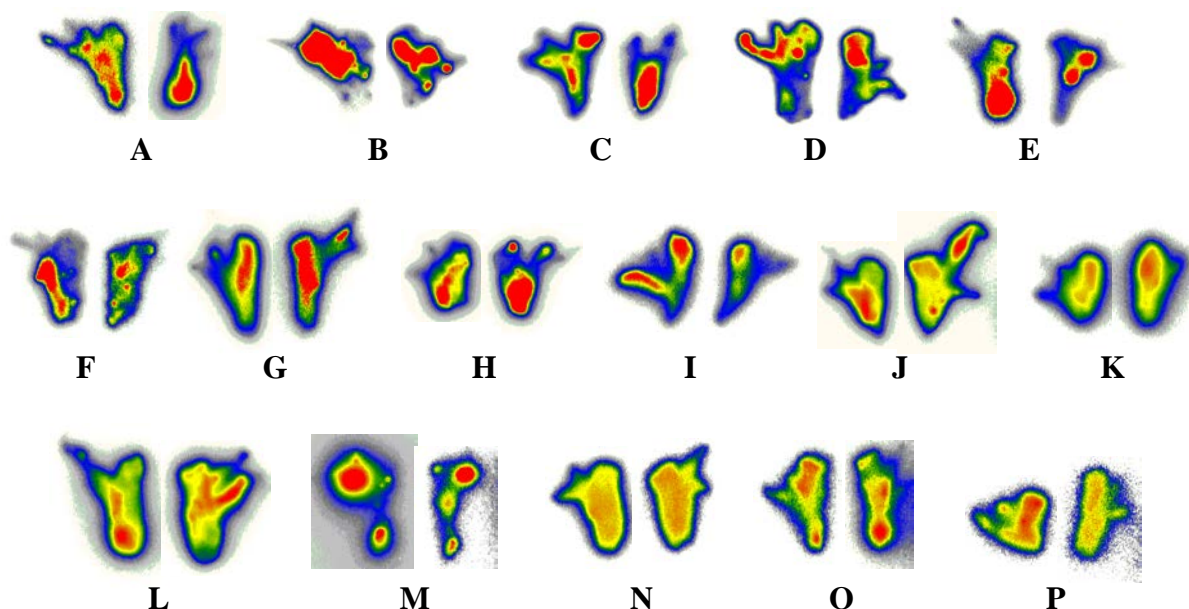

**Intranasal  $^{125}\text{I}$ -Oxytocin Animals:**

- A) Rat 10: Left (intensity: 420-2970) and Right (intensity: 329-19,546) Trigeminal Ganglion
- B) Rat 11: Left (intensity: 1,278-11,494) and Right (intensity: 6,786-53,983) Trigeminal Ganglion
- C) Rat 12: Left (intensity: 4,534-34,091) and Right (intensity: 1,485-18,309) Trigeminal Ganglion
- D) Rat 13: Left (intensity: 3,241-18,501) and Right (intensity: 2,654-17,523) Trigeminal Ganglion
- E) Rat 14: Left (intensity: 840-4,395) and Right (intensity: 979-7,371) Trigeminal Ganglion
- F) Rat 15: Left (intensity: 714-7,750) and Right (intensity: 486-3,152) Trigeminal Ganglion
- G) Rat 16: Left (intensity: 1,066-25,000) and Right (intensity: 677-6,222) Trigeminal Ganglion
- H) Rat 17: Left (intensity: 1,094-65,283) and Right (intensity: 1,091-27,062) Trigeminal Ganglion

**Intranasal  $^{125}\text{I}$ -Oxytocin with 1% Mucoadhesive Animals:**

- I) Rat 22: Left (intensity: 969-10,044) and Right (intensity: 969-10,044) Trigeminal Ganglion
- J) Rat 23: Left (intensity: 2,308-50,000) and Right (intensity: 2,112-27,822) Trigeminal Ganglion
- K) Rat 28: Left (intensity: 1,164-30,306) and Right (intensity: 1,164-35,753) Trigeminal Ganglion
- L) Rat 29: Left (intensity: 592-30,000) and Right (intensity: 986-50,000) Trigeminal Ganglion
- M) Rat 34: Left (intensity: 397-39,409) and Right (intensity: 1,338-6,385) Trigeminal Ganglion
- N) Rat 35: Left (intensity: 819-15,810) and Right (intensity: 667-6,669) Trigeminal Ganglion
- O) Rat 36: Left (intensity: 1,009-4,664) and Right (intensity: 1,186-9,982) Trigeminal Ganglion
- P) Rat 37: Left (intensity: 607-5,015) and Right (intensity: 489-2,623) Trigeminal Ganglion

\*\*All images were copied at 200% magnification and displayed at 15%.

## **Appendix A – Intranasal Oxytocin Data**

### **Tables**

Table A01: Intranasal Oxytocin Rat 1 Data  
Table A02: Intranasal Oxytocin Rat 2 Data  
Table A03: Intranasal Oxytocin Rat 3 Data  
Table A04: Intranasal Oxytocin Rat 4 Data  
Table A05: Intranasal Oxytocin Rat 5 Data  
Table A06: Intranasal Oxytocin Rat 6 Data  
Table A07: Intranasal Oxytocin Rat 7 Data  
Table A08: Intranasal Oxytocin Rat 8 Data  
Table A09: Intranasal Oxytocin Rat 9 Data  
Table A10: Intranasal Oxytocin Rat 10 Data  
Table A11: Intranasal Oxytocin Rat 11 Data  
Table A12: Intranasal Oxytocin Rat 12 Data  
Table A13: Intranasal Oxytocin Rat 13 Data  
Table A14: Intranasal Oxytocin Rat 14 Data  
Table A15: Intranasal Oxytocin Rat 15 Data  
Table A16: Intranasal Oxytocin Rat 16 Data  
Table A17: Intranasal Oxytocin Rat 17 Data  
Table A18: Intranasal Oxytocin Rat 18 Data  
Table A19: Intranasal Oxytocin Rat 19 Data  
Table A20: Intranasal Oxytocin Rat 40 Data  
Table A21: Intranasal Oxytocin Rat 41 Data

**Table A01: Intranasal Oxytocin Rat 1 Data**

| Oxytocin Rat 1    | Route | Com-pound | Volume (uL) | uCi   | mg    | Time (min) | Perfused @ (min) |
|-------------------|-------|-----------|-------------|-------|-------|------------|------------------|
| Amount Delivered: | IN    | Oxytocin  | 48          | 45.58 | 0.405 | 14:00:00   | 30:40:00         |

| Tissue Description           | Tube # | Tube (g) | Tissue + Tube (g) | Tissue Weight (g) | CPM     | CPM -25 bkgd | nM (Spec. Act.)   | nM (Stan.)        |
|------------------------------|--------|----------|-------------------|-------------------|---------|--------------|-------------------|-------------------|
| Dorsal Dura                  | 1      | 3.01010  | 3.02595           | 0.01585           | 782     | 757          | 237.33            | 290.74            |
| Ventral Dura                 | 2      | 2.97360  | 2.98360           | 0.01000           | 734     | 709          | 352.32            | 431.60            |
| Trigeminal Ganglion          | 3      | 2.98301  | 3.00588           | 0.02287           | 6081    | 6056         | 1,315.87          | 1,611.97          |
| Maxillary Nerve              | 4      | 2.97272  | 2.98487           | 0.01215           | 4525    | 4500         | 1,840.47          | 2,254.62          |
| Ophthalmic Nerve             | 5      | 2.98445  | 2.98740           | 0.00295           | 373     | 348          | 586.21            | 718.11            |
| Mandibular Nerve             | 6      | 2.97976  | 2.98412           | 0.00436           | 1520    | 1495         | 1,703.91          | 2,087.33          |
| Upper Cervical Spinal Cord   | 7      | 2.99311  | 3.05070           | 0.05759           | 562     | 537          | 46.34             | 56.76             |
| Olfactory Bulbs              | 8      | 2.97921  | 3.04719           | 0.06798           | 3282    | 3257         | 238.08            | 291.66            |
| Anterior Olfactory Nucleus   | 9      | 2.95899  | 2.99727           | 0.03828           | 698     | 673          | 87.36             | 107.02            |
| Frontal Cortex               | 10     | 2.98091  | 3.01846           | 0.03755           | 237     | 212          | 28.06             | 34.37             |
| Caudate/Putamen              | 11     | 2.96759  | 2.97879           | 0.01120           | 71      | 46           | 20.41             | 25.00             |
| Septal Nucleus               | 12     | 2.96712  | 2.97780           | 0.01068           | 89      | 64           | 29.78             | 36.48             |
| Parietal Cortex              | 13     | 2.96334  | 2.99864           | 0.03530           | 138     | 113          | 15.91             | 19.49             |
| Hippocampus                  | 14     | 3.00539  | 3.03489           | 0.02950           | 88      | 63           | 10.61             | 13.00             |
| Thalamus                     | 15     | 2.99637  | 3.05372           | 0.05735           | 183     | 158          | 13.69             | 16.77             |
| Hypothalamus                 | 16     | 2.99756  | 3.01876           | 0.02120           | 347     | 322          | 75.48             | 92.46             |
| Midbrain                     | 17     | 2.98102  | 3.10148           | 0.12046           | 737     | 712          | 29.37             | 35.98             |
| Pons                         | 18     | 2.95627  | 3.02326           | 0.06699           | 421     | 396          | 29.38             | 35.99             |
| Medulla                      | 19     | 2.95652  | 3.04044           | 0.08392           | 512     | 487          | 28.84             | 35.33             |
| Cerebellum                   | 20     | 2.99099  | 3.22203           | 0.23104           | 1128    | 1103         | 23.72             | 29.06             |
| Superficial Nodes (2)        | 21     | 3.06435  | 3.13725           | 0.07290           | 339     | 314          | 21.40             | 26.22             |
| Cervical Nodes (2)           | 22     | 2.96836  | 2.98147           | 0.01311           | 2014    | 1989         | 753.92            | 923.57            |
| Thyroid                      | 23     | 2.97883  | 2.99650           | 0.01767           | 3355    | 3330         | 936.48            | 1,147.21          |
| Olfactory Epithelium         | 24     | 2.95726  | 3.05675           | 0.09949           | 4009971 | 4009946      | 200,286.73        | 245,355.35        |
| Respiratory Epithelium       | 25     | 2.99576  | 3.06882           | 0.07306           | 4913993 | 4913968      | 334,230.23        | 409,438.90        |
| Axillary Nodes (2)           | 26     | 2.99975  | 3.02743           | 0.02768           | 156     | 131          | 23.52             | 28.81             |
| Muscle (R, deltoid)          | 27     | 3.01312  | 3.03442           | 0.02130           | 102     | 77           | 17.96             | 22.01             |
| Liver (R, superficial lobe)  | 28     | 3.07831  | 3.10490           | 0.02659           | 209     | 184          | 34.39             | 42.12             |
| Kidney (L, tip)              | 29     | 3.01389  | 3.04249           | 0.02860           | 380     | 355          | 61.68             | 75.56             |
| Lung (R, top lobe)           | 30     | 2.98465  | 3.00985           | 0.02520           | 227     | 202          | 39.83             | 48.80             |
| Trachea (near cut-off)       | 31     | 2.99365  | 3.00564           | 0.01199           | 25634   | 25609        | 10,613.69         | 13,001.99         |
| Esophagus (near cut-off)     | 32     | 2.99155  | 3.00575           | 0.01420           | 8154    | 8129         | 2,844.74          | 3,484.86          |
| Spleen (tip)                 | 33     | 3.00784  | 3.04004           | 0.03220           | 271     | 246          | 37.96             | 46.51             |
| Heart                        | 34     | 3.04134  | 3.07506           | 0.03372           | 179     | 154          | 22.69             | 27.80             |
| Urine (fill to line of tube) | 35     | 2.97516  | 3.25863           | 0.28347           | 8318    | 8293         | 145.38            | 178.09            |
| Spinal Dura                  | 36     | 2.98731  | 3.00219           | 0.01488           | 202     | 177          | 59.11             | 72.41             |
| Lower Cervical Spinal Cord   | 37     | 2.98871  | 3.08033           | 0.09162           | 789     | 764          | 41.44             | 50.76             |
| Thoracic Spinal Cord         | 38     | 3.04743  | 3.13014           | 0.08271           | 389     | 364          | 21.87             | 26.79             |
| Lumbar Spinal Cord           | 39     | 3.08444  | 3.20457           | 0.12013           | 270     | 245          | 10.13             | 12.42             |
| Blood Sample                 | 40     | 2.98091  | 3.22503           | 0.24412           | 4953    | 4928         | 100.31            | 122.89            |
| Drug Standard                | 41     | 2.98305  | 2.98602           | 0.00297           | 4202487 | 4202462      | 7,031,377.63      | 8,613,581.91      |
| Drug Standard                | 42     | 2.96106  | 2.96388           | 0.00282           | 4135202 | 4135177      | 7,286,820.52      | 8,926,504.69      |
| Drug Standard                | 43     | 2.98902  | 2.99184           | 0.00282           | 4051391 | 4051366      | 7,139,132.59      | 8,745,583.95      |
|                              |        |          |                   |                   |         |              | 0.201<br>cpm/fmol | 0.164<br>cpm/fmol |

| Auto Calculations                                        | Enter Values                        |
|----------------------------------------------------------|-------------------------------------|
| Total uL of Dose Sol = 61.4                              | Oxytocin Molecular Weight = 1,007   |
| Hot mg = 0.000031                                        | Date of Synthesis = 10/03/07        |
| Cold mg = 0.5181                                         | Hot uCi/uL at Synthesis = 2,300     |
| Total mg in Dose Sol = 0.5182                            | Hot uCi/ug at Synthesis = 1985.72   |
| Conc Of Dose Sol (ug/uL) = 8.4400                        | Cold ug/uL = 15.00                  |
| Days after Synthesis Delivered = 5                       | Desired uCi = 45.0                  |
| Decay on Day Delivered = 0.9439                          | Desired mg = 0.400                  |
| Total uCi in Dose Sol on Day Delivered = 58.29           | Estimated Desired nmol = 397.1      |
| uCi/uL in Dose Sol on Day Delivered = 0.9495             | <b>Date of Delivery = 10/08/07</b>  |
| mg delivered = 0.405                                     | <b>uL delivered (actual) = 48.0</b> |
| uCi delivered = 45.58                                    | <b>Date of Counting = 10/08/07</b>  |
| Estimated nmol delivered = 402.23                        | <b>Dose Calculator</b>              |
| Days after Synthesis Counted = 5                         | uL Hot to Deliver = 20.73           |
| Decay on Day Counted = 0.9439                            | uL Cold to Deliver = 26.67          |
| Specific Activity from Amersham Specs (cpm/fmol) = 0.201 | Total uL to Deliver = 47.39         |
| Avg. Volume of Standard (uL)* = 3.0                      | Hot to Cold Ratio = 0.78            |
| Avg. CPM-bkgd of Standard = 4,129,668                    | Total uL to Make = 61.39            |
| Specific Activity from Standards: (CPM/fmol) = 0.164     | Dose Solution uL Hot = 26.85        |
| Date of Disposal from Decay Storage = 05/25/09           | Dose Solution uL Cold = 34.54       |

**Table A02: Intranasal Oxytocin Rat 2 Data**

| Oxytocin Rat 2    | Route | Com-pound | Volume (uL) | uCi   | mg    | Time (min) | Perfused @ (min) |
|-------------------|-------|-----------|-------------|-------|-------|------------|------------------|
| Amount Delivered: | IN    | Oxytocin  | 48          | 44.88 | 0.399 | 14:30:00   | 19:41:00         |

| Tissue Description           | Tube # | Tube (g) | Tissue + Tube (g) | Tissue Weight (g) | CPM     | CPM -25 bkgd | nM (Spec. Act.) | nM (Stan.)    |
|------------------------------|--------|----------|-------------------|-------------------|---------|--------------|-----------------|---------------|
| Dorsal Dura                  | 1      | 2.98818  | 3.00330           | 0.01512           | 401     | 376          | 123.57          | 148.55        |
| Ventral Dura                 | 2      | 3.00873  | 3.01614           | 0.00741           | 796     | 771          | 517.05          | 621.54        |
| Trigeminal Ganglion          | 3      | 3.01057  | 3.03710           | 0.02653           | 9956    | 9931         | 1,860.15        | 2,236.08      |
| Maxillary Nerve              | 4      | 3.00654  | 3.02260           | 0.01606           | 5452    | 5427         | 1,679.22        | 2,018.58      |
| Ophthalmic Nerve             | 5      | 3.04874  | 3.05097           | 0.00223           | 254     | 229          | 510.30          | 613.43        |
| Mandibular Nerve             | 6      | 3.00407  | 3.00764           | 0.00357           | 590     | 565          | 786.45          | 945.39        |
| Upper Cervical Spinal Cord   | 7      | 2.98850  | 3.04562           | 0.05712           | 847     | 822          | 71.51           | 85.96         |
| Olfactory Bulbs              | 8      | 2.99192  | 3.05358           | 0.06166           | 3508    | 3483         | 280.70          | 337.43        |
| Anterior Olfactory Nucleus   | 9      | 3.01640  | 3.05402           | 0.03762           | 514     | 489          | 64.59           | 77.65         |
| Frontal Cortex               | 10     | 2.98514  | 3.02403           | 0.03889           | 173     | 148          | 18.91           | 22.73         |
| Caudate/Putamen              | 11     | 3.07400  | 3.08505           | 0.01105           | 67      | 42           | 18.89           | 22.70         |
| Septal Nucleus               | 12     | 3.00514  | 3.01517           | 0.01003           | 84      | 59           | 29.23           | 35.14         |
| Parietal Cortex              | 13     | 2.99673  | 3.03402           | 0.03729           | 120     | 95           | 12.66           | 15.22         |
| Hippocampus                  | 14     | 2.97512  | 3.01188           | 0.03676           | 79      | 54           | 7.30            | 8.78          |
| Thalamus                     | 15     | 3.08133  | 3.15359           | 0.07226           | 186     | 161          | 11.07           | 13.31         |
| Hypothalamus                 | 16     | 2.98907  | 3.01316           | 0.02409           | 304     | 279          | 57.55           | 69.18         |
| Midbrain                     | 17     | 3.00710  | 3.10757           | 0.10047           | 464     | 439          | 21.71           | 26.10         |
| Pons                         | 18     | 3.05209  | 3.11663           | 0.06454           | 377     | 352          | 27.10           | 32.58         |
| Medulla                      | 19     | 2.98394  | 3.07279           | 0.08885           | 936     | 911          | 50.95           | 61.25         |
| Cerebellum                   | 20     | 2.99045  | 3.21777           | 0.22732           | 1624    | 1599         | 34.95           | 42.02         |
| Superficial Nodes (2)        | 21     | 2.98393  | 3.04658           | 0.06265           | 1280    | 1255         | 99.54           | 119.66        |
| Cervical Nodes (2)           | 22     | 2.99324  | 3.00006           | 0.00682           | 975     | 950          | 692.20          | 832.09        |
| Thyroid                      | 23     | 3.02080  | 3.04792           | 0.02712           | 4629    | 4604         | 843.60          | 1,014.09      |
| Olfactory Epithelium         | 24     | 2.98865  | 3.11091           | 0.12226           | 5923985 | 5923960      | 240,780.22      | 289,440.22    |
| Respiratory Epithelium       | 25     | 2.99542  | 3.03626           | 0.04084           | 2967056 | 2967031      | 361,018.48      | 433,977.79    |
| Axillary Nodes (2)           | 26     | 2.99503  | 3.06740           | 0.07237           | 133     | 108          | 7.42            | 8.91          |
| Muscle (R, deltoid)          | 27     | 2.96846  | 2.98938           | 0.02092           | 72      | 47           | 11.16           | 13.42         |
| Liver (R, superficial lobe)  | 28     | 2.97778  | 3.01466           | 0.03688           | 160     | 135          | 18.19           | 21.87         |
| Kidney (L, tip)              | 29     | 2.97853  | 3.01178           | 0.03325           | 279     | 254          | 37.96           | 45.63         |
| Lung (R, top lobe)           | 30     | 3.06381  | 3.07934           | 0.01553           | 152     | 127          | 40.64           | 48.85         |
| Trachea (near cut-off)       | 31     | 2.98044  | 2.99153           | 0.01109           | 8149    | 8124         | 3,640.25        | 4,375.92      |
| Esophagus (near cut-off)     | 32     | 2.96610  | 2.97945           | 0.01335           | 1232    | 1207         | 449.28          | 540.08        |
| Spleen (tip)                 | 33     | 2.99118  | 3.03841           | 0.04723           | 205     | 180          | 18.94           | 22.77         |
| Heart                        | 34     | 3.00503  | 3.03324           | 0.02821           | 184     | 159          | 28.01           | 33.67         |
| Urine (fill to line of tube) | 35     | 2.99665  | 3.21820           | 0.22155           | 2044    | 2019         | 45.29           | 54.44         |
| Spinal Dura                  | 36     | 2.97461  | 2.98277           | 0.00816           | 138     | 113          | 68.81           | 82.72         |
| Lower Cervical Spinal Cord   | 37     | 3.00809  | 3.12053           | 0.11244           | 334     | 309          | 13.66           | 16.42         |
| Thoracic Spinal Cord         | 38     | 2.99645  | 3.06370           | 0.06725           | 207     | 182          | 13.45           | 16.17         |
| Lumbar Spinal Cord           | 39     | 2.97142  | 3.10496           | 0.13354           | 212     | 187          | 6.96            | 8.36          |
| Blood Sample                 | 40     | 3.00094  | 3.30003           | 0.29909           | 6047    | 6022         | 100.05          | 120.27        |
| Drug Standard                | 41     | 2.98465  | 2.98677           | 0.00212           | 4194193 | 4194168      | 9,831,120.94    | 11,817,921.94 |
| Drug Standard                | 42     | 2.98250  | 2.98426           | 0.00176           | 3990123 | 3990098      | 11,265,850.19   | 13,542,599.97 |
| Drug Standard                | 43     | 3.04367  | 3.04579           | 0.00212           | 4249343 | 4249318      | 9,960,392.42    | 11,973,318.29 |
|                              |        |          |                   |                   |         |              | 0.201           | 0.167         |
|                              |        |          |                   |                   |         |              | cpm/fmol        | cpm/fmol      |

| Auto Calculations                                        | Enter Values                      |
|----------------------------------------------------------|-----------------------------------|
| Total uL of Dose Sol = 62.1                              | Oxytocin Molecular Weight = 1,007 |
| Hot mg = 0.0000                                          | Date of Synthesis = 10/03/07      |
| Cold mg = 0.5163                                         | Hot uCi/uL at Synthesis = 2.300   |
| Total mg in Dose Sol = 0.5164                            | Hot uCi/ug at Synthesis = 1985.72 |
| Conc Of Dose Sol (ug/uL) = 8.3118                        | Cold ug/uL = 15.00                |
| Days after Synthesis Delivered = 8                       | Desired uCi = 45.0                |
| Decay on Day Delivered = 0.9117                          | Desired mg = 0.400                |
| Total uCi in Dose Sol on Day Delivered = 58.09           | Estimated Desired nmol = 397.1    |
| uCi/uL in Dose Sol on Day Delivered = 0.9351             | Date of Delivery = 10/11/07       |
| mg delivered = 0.399                                     | uL delivered (actual) = 48.0      |
| uCi delivered = 44.88                                    | Date of Counting = 10/11/07       |
| Estimated nmol delivered = 396.12                        | <b>Dose Calculator</b>            |
| Days after Synthesis Counted = 8                         | uL Hot to Deliver = 21.46         |
| Decay on Day Counted = 0.9117                            | uL Cold to Deliver = 26.67        |
| Specific Activity from Amersham Specs (cpm/fmol) = 0.201 | Total uL to Deliver = 48.12       |
| Avg. Volume of Standard (uL)* = 3.0                      | Hot to Cold Ratio = 0.80          |
| Avg. CPM-bkgd of Standard = 4,144,528                    | Total uL to Make = 62.12          |
| Specific Activity from Standards: (CPM/fmol) = 0.167     | Dose Solution uL Hot = 27.70      |
| Date of Disposal from Decay Storage = 05/25/09           | Dose Solution uL Cold = 34.42     |

**Table A03: Intranasal Oxytocin Rat 3 Data**

| Oxytocin Rat 3    | Route | Com-pound | Volume (uL) | uCi   | mg    | Time (min) | Perfused @ (min) |
|-------------------|-------|-----------|-------------|-------|-------|------------|------------------|
| Amount Delivered: | IN    | Oxytocin  | 48          | 44.88 | 0.399 | 14:01:00   | 30:30:00         |

| Tissue Description           | Tube # | Tube (g) | Tissue + Tube (g) | Tissue Weight (g) | CPM     | CPM -25 bkgd | nM (Spec. Act.)   | nM (Stan.)        |
|------------------------------|--------|----------|-------------------|-------------------|---------|--------------|-------------------|-------------------|
| Dorsal Dura                  | 1      | 2.98222  | 2.99067           | 0.00845           | 852     | 827          | 486.34            | 584.86            |
| Ventral Dura                 | 2      | 2.98906  | 3.00177           | 0.01271           | 507     | 482          | 188.45            | 226.62            |
| Trigeminal Ganglion          | 3      | 2.99660  | 3.01803           | 0.02143           | 833     | 808          | 187.36            | 225.32            |
| Maxillary Nerve              | 4      | 3.01705  | 3.02623           | 0.00918           | 849     | 824          | 446.04            | 536.40            |
| Ophthalmic Nerve             | 5      | 3.01276  | 3.01629           | 0.00353           | 353     | 328          | 461.73            | 555.27            |
| Mandibular Nerve             | 6      | 3.02464  | 3.02979           | 0.00515           | 164     | 139          | 134.12            | 161.29            |
| Upper Cervical Spinal Cord   | 7      | 2.99489  | 3.00858           | 0.01369           | 264     | 239          | 86.75             | 104.33            |
| Olfactory Bulbs              | 8      | 2.99530  | 3.07149           | 0.07619           | 548     | 523          | 34.11             | 41.02             |
| Anterior Olfactory Nucleus   | 9      | 2.99413  | 3.02707           | 0.03294           | 144     | 119          | 17.95             | 21.59             |
| Frontal Cortex               | 10     | 3.00851  | 3.05039           | 0.04188           | 147     | 122          | 14.48             | 17.41             |
| Caudate/Putamen              | 11     | 3.00739  | 3.02060           | 0.01321           | 71      | 46           | 17.30             | 20.81             |
| Septal Nucleus               | 12     | 3.01892  | 3.03334           | 0.01442           | 71      | 46           | 15.85             | 19.06             |
| Parietal Cortex              | 13     | 3.01357  | 3.04459           | 0.03102           | 90      | 65           | 10.41             | 12.52             |
| Hippocampus                  | 14     | 3.01269  | 3.05545           | 0.04276           | 89      | 64           | 7.44              | 8.94              |
| Thalamus                     | 15     | 2.99047  | 3.06192           | 0.07145           | 179     | 154          | 10.71             | 12.88             |
| Hypothalamus                 | 16     | 3.07538  | 3.09611           | 0.02073           | 99      | 74           | 17.74             | 21.33             |
| Midbrain                     | 17     | 3.00260  | 3.11708           | 0.11448           | 340     | 315          | 13.67             | 16.44             |
| Pons                         | 18     | 2.99275  | 3.04592           | 0.05317           | 218     | 193          | 18.04             | 21.69             |
| Medulla                      | 19     | 3.01266  | 3.09667           | 0.08401           | 287     | 262          | 15.50             | 18.64             |
| Cerebellum                   | 20     | 3.00469  | 3.23542           | 0.23073           | 1008    | 983          | 21.17             | 25.46             |
| Superficial Nodes (2)        | 21     | 3.01548  | 3.08673           | 0.07125           | 3218    | 3193         | 222.69            | 267.80            |
| Cervical Nodes (2)           | 22     | 2.99721  | 3.00427           | 0.00706           | 223     | 198          | 139.36            | 167.60            |
| Thyroid                      | 23     | 3.01899  | 3.04046           | 0.02147           | 27680   | 27655        | 6,400.81          | 7,697.38          |
| Olfactory Epithelium         | 24     | 2.96732  | 2.99275           | 0.02543           | 1704319 | 1704294      | 333,036.04        | 400,497.36        |
| Respiratory Epithelium       | 25     | 3.01976  | 3.08965           | 0.06989           | 875145  | 875120       | 62,222.24         | 74,826.27         |
| Axillary Nodes (2)           | 26     | 2.98992  | 3.00989           | 0.01997           | 182     | 157          | 39.07             | 46.98             |
| Muscle (R, deltoid)          | 27     | 2.97596  | 2.99729           | 0.02133           | 109     | 84           | 19.57             | 23.53             |
| Liver (R, superficial lobe)  | 28     | 3.00633  | 3.04573           | 0.03940           | 184     | 159          | 20.05             | 24.12             |
| Kidney (L, tip)              | 29     | 3.00506  | 3.04376           | 0.03870           | 310     | 285          | 36.60             | 44.01             |
| Lung (R, top lobe)           | 30     | 2.95733  | 2.96906           | 0.01173           | 198     | 173          | 73.29             | 88.14             |
| Trachea (near cut-off)       | 31     | 2.97508  | 2.98648           | 0.01140           | 26636   | 26611        | 11,599.77         | 13,949.47         |
| Esophagus (near cut-off)     | 32     | 2.95403  | 2.96635           | 0.01232           | 607963  | 607938       | 245,211.97        | 294,883.24        |
| Spleen (tip)                 | 33     | 2.98440  | 3.02191           | 0.03751           | 220     | 195          | 25.83             | 31.07             |
| Heart                        | 34     | 2.99520  | 3.04042           | 0.04522           | 251     | 226          | 24.84             | 29.87             |
| Urine (fill to line of tube) | 35     | 3.00929  | 3.16878           | 0.15949           | 10584   | 10559        | 328.99            | 395.63            |
| Spinal Dura                  | 36     | 2.97412  | 2.98534           | 0.01122           | 235     | 210          | 93.01             | 111.85            |
| Lower Cervical Spinal Cord   | 37     | 2.96956  | 3.11129           | 0.14173           | 529     | 504          | 17.67             | 21.25             |
| Thoracic Spinal Cord         | 38     | 2.95489  | 3.04533           | 0.09044           | 193     | 168          | 9.23              | 11.10             |
| Lumbar Spinal Cord           | 39     | 2.99487  | 3.13581           | 0.14094           | 573     | 548          | 19.32             | 23.24             |
| Blood Sample                 | 40     | 2.98184  | 3.26946           | 0.28762           | 5414    | 5389         | 93.11             | 111.97            |
| Drug Standard                | 41     | 2.98465  | 2.98677           | 0.00212           | 4194788 | 4194763      | 9,832,515.62      | 11,824,235.51     |
| Drug Standard                | 42     | 2.98250  | 2.98426           | 0.00176           | 3983203 | 3983178      | 11,246,311.90     | 13,524,416.91     |
| Drug Standard                | 43     | 3.04367  | 3.04579           | 0.00212           | 4250792 | 4250767      | 9,963,788.88      | 11,982,100.08     |
|                              |        |          |                   |                   |         |              | 0.201<br>cpm/fmol | 0.167<br>cpm/fmol |

| Auto Calculations                                        | Enter Values                        |
|----------------------------------------------------------|-------------------------------------|
| Total uL of Dose Sol = 62.1                              | Oxytocin Molecular Weight = 1,007   |
| Hot mg = 0.0000                                          | Date of Synthesis = 10/03/07        |
| Cold mg = 0.5163                                         | Hot uCi/uL at Synthesis = 2.300     |
| Total mg in Dose Sol = 0.5164                            | Hot uCi/ug at Synthesis = 1985.72   |
| Conc Of Dose Sol (ug/uL) = 8.3118                        | Cold ug/uL = 15.00                  |
| Days after Synthesis Delivered = 8                       | Desired uCi = 45.0                  |
| Decay on Day Delivered = 0.9117                          | Desired mg = 0.400                  |
| Total uCi in Dose Sol on Day Delivered = 58.09           | Estimated Desired nmol = 397.1      |
| uCi/uL in Dose Sol on Day Delivered = 0.9351             | <b>Date of Delivery = 10/11/07</b>  |
| mg delivered = 0.399                                     | <b>uL delivered (actual) = 48.0</b> |
| uCi delivered = 44.88                                    | <b>Date of Counting = 10/11/07</b>  |
| Estimated nmol delivered = 396.12                        | <b>Dose Calculator</b>              |
| Days after Synthesis Counted = 8                         | uL Hot to Deliver = 21.46           |
| Decay on Day Counted = 0.9117                            | uL Cold to Deliver = 26.67          |
| Specific Activity from Amersham Specs (cpm/fmol) = 0.201 | Total uL to Deliver = 48.12         |
| Avg. Volume of Standard (uL)* = 3.0                      | Hot to Cold Ratio = 0.80            |
| Avg. CPM-bkgd of Standard = 4,142,903                    | Total uL to Make = 62.12            |
| Specific Activity from Standards: (CPM/fmol) = 0.167     | Dose Solution uL Hot = 27.70        |
| Date of Disposal from Decay Storage = 05/25/09           | Dose Solution uL Cold = 34.42       |

**Table A04: Intranasal Oxytocin Rat 4 Data**

| Oxytocin Rat 4    | Route | Com-pound | Volume (uL) | uCi   | mg    | Time (min) | Perfused @ (min) |  |
|-------------------|-------|-----------|-------------|-------|-------|------------|------------------|--|
| Amount Delivered: | IN    | Oxytocin  | 48.0        | 43.96 | 0.391 | 14:00:00   | 32:00:00         |  |

  

| Tissue Description           | Tube # | Tube (g) | Tissue + Tube (g) | Tissue Weight (g) | CPM     | CPM -25 bkgd | nM (Spec. Act.)   | nM (Stan.)        |
|------------------------------|--------|----------|-------------------|-------------------|---------|--------------|-------------------|-------------------|
| Dorsal Dura                  | 1      | 3.01197  | 3.02478           | 0.01281           | 305     | 280          | 108.62            | 134.50            |
| Ventral Dura                 | 2      | 3.01926  | 3.02830           | 0.00904           | 345     | 320          | 175.90            | 217.82            |
| Trigeminal Ganglion          | 3      | 3.08378  | 3.10802           | 0.02424           | 2745    | 2720         | 557.61            | 690.47            |
| Maxillary Nerve              | 4      | 2.99555  | 3.01076           | 0.01521           | 1258    | 1233         | 402.83            | 498.82            |
| Ophthalmic Nerve             | 5      | 3.01186  | 3.01717           | 0.00531           | 192     | 167          | 156.28            | 193.52            |
| Mandibular Nerve             | 6      | 3.03741  | 3.04075           | 0.00334           | 157     | 132          | 196.39            | 243.19            |
| Upper Cervical Spinal Cord   | 7      | 3.01020  | 3.05645           | 0.04625           | 132     | 107          | 11.50             | 14.24             |
| Olfactory Bulbs              | 8      | 2.98239  | 3.05396           | 0.07157           | 261     | 236          | 16.39             | 20.29             |
| Anterior Olfactory Nucleus   | 9      | 3.03957  | 3.08534           | 0.04577           | 163     | 138          | 14.98             | 18.55             |
| Frontal Cortex               | 10     | 3.00554  | 3.03952           | 0.03398           | 145     | 120          | 17.55             | 21.73             |
| Caudate/Putamen              | 11     | 3.07779  | 3.09135           | 0.01356           | 123     | 98           | 35.91             | 44.47             |
| Septal Nucleus               | 12     | 3.00202  | 3.01791           | 0.01589           | 75      | 50           | 15.64             | 19.36             |
| Parietal Cortex              | 13     | 3.00620  | 3.03299           | 0.02679           | 76      | 51           | 9.46              | 11.71             |
| Hippocampus                  | 14     | 3.00746  | 3.04000           | 0.03254           | 63      | 38           | 5.80              | 7.19              |
| Thalamus                     | 15     | 3.01601  | 3.08542           | 0.06941           | 99      | 74           | 5.30              | 6.56              |
| Hypothalamus                 | 16     | 3.01466  | 3.04107           | 0.02641           | 69      | 44           | 8.28              | 10.25             |
| Midbrain                     | 17     | 3.07206  | 3.18799           | 0.11593           | 181     | 156          | 6.69              | 8.28              |
| Pons                         | 18     | 2.99457  | 3.06305           | 0.06848           | 159     | 134          | 9.72              | 12.04             |
| Medulla                      | 19     | 2.98287  | 3.06381           | 0.08094           | 209     | 184          | 11.30             | 13.99             |
| Cerebellum                   | 20     | 2.97841  | 3.24200           | 0.26359           | 484     | 459          | 8.65              | 10.72             |
| Superficial Nodes (2)        | 21     | 3.01550  | 3.09388           | 0.07838           | 1864    | 1839         | 116.59            | 144.37            |
| Cervical Nodes (2)           | 22     | 3.00593  | 3.01725           | 0.01132           | 418     | 393          | 172.52            | 213.63            |
| Thyroid                      | 23     | 3.00100  | 3.02549           | 0.02449           | 8750    | 8725         | 1,770.39          | 2,192.23          |
| Olfactory Epithelium         | 24     | 3.00325  | 3.08126           | 0.07801           | 94956   | 94931        | 6,047.15          | 7,488.04          |
| Respiratory Epithelium       | 25     | 3.01720  | 3.04889           | 0.03169           | 3971111 | 3971086      | 622,701.81        | 771,076.57        |
| Axillary Nodes (2)           | 26     | 2.96689  | 2.99796           | 0.03107           | 118     | 93           | 14.87             | 18.42             |
| Muscle (R, deltoid)          | 27     | 2.95544  | 2.98076           | 0.02532           | 63      | 38           | 7.46              | 9.23              |
| Liver (R, superficial lobe)  | 28     | 2.97190  | 3.00280           | 0.03090           | 101     | 76           | 12.22             | 15.13             |
| Kidney (L, tip)              | 29     | 2.98662  | 3.01919           | 0.03257           | 226     | 201          | 30.67             | 37.97             |
| Lung (R, top lobe)           | 30     | 2.97276  | 2.99119           | 0.01843           | 125     | 100          | 26.96             | 33.39             |
| Trachea (near cut-off)       | 31     | 3.06223  | 3.07554           | 0.01331           | 59      | 34           | 12.69             | 15.72             |
| Esophagus (near cut-off)     | 32     | 2.99967  | 3.01161           | 0.01194           | 50      | 25           | 10.40             | 12.88             |
| Spleen (tip)                 | 33     | 2.97510  | 3.01128           | 0.03618           | 111     | 86           | 11.81             | 14.63             |
| Heart                        | 34     | 2.99119  | 3.02202           | 0.03083           | 125     | 100          | 16.12             | 19.96             |
| Urine (fill to line of tube) | 35     | 2.97076  | 3.23913           | 0.26837           | 664     | 639          | 11.83             | 14.65             |
| Spinal Dura                  | 36     | 2.97020  | 2.98202           | 0.01182           | 67      | 42           | 17.66             | 21.86             |
| Lower Cervical Spinal Cord   | 37     | 3.00247  | 3.12990           | 0.12743           | 115     | 90           | 3.51              | 4.35              |
| Thoracic Spinal Cord         | 38     | 2.98200  | 3.07002           | 0.08802           | 90      | 65           | 3.67              | 4.54              |
| Lumbar Spinal Cord           | 39     | 2.97788  | 3.12039           | 0.14251           | 131     | 106          | 3.70              | 4.58              |
| Blood Sample                 | 40     | 2.99370  | 3.28305           | 0.28935           | 2609    | 2584         | 44.38             | 54.95             |
| Drug Standard                | 41     | 2.99100  | 2.99392           | 0.00292           | 3930989 | 3930964      | 6,689,740.82      | 8,283,744.02      |
| Drug Standard                | 42     | 3.02776  | 3.03062           | 0.00286           | 3977841 | 3977816      | 6,911,490.80      | 8,558,331.65      |
| Drug Standard                | 43     | 2.98891  | 2.99133           | 0.00242           | 3912295 | 3912270      | 8,033,532.05      | 9,947,728.15      |
|                              |        |          |                   |                   |         |              | 0.201<br>cpm/fmol | 0.163<br>cpm/fmol |

| Auto Calculations                                        | Enter Values                        |
|----------------------------------------------------------|-------------------------------------|
| Total uL of Dose Sol = 63.1                              | Oxytocin Molecular Weight = 1,007   |
| Hot mg = 0.0000                                          | Date of Synthesis = 10/03/07        |
| Cold mg = 0.5139                                         | Hot uCi/uL at Synthesis = 2,300     |
| Total mg in Dose Sol = 0.5140                            | Hot uCi/ug at Synthesis = 1985.72   |
| Conc Of Dose Sol (ug/uL) = 8.1402                        | Cold ug/uL = 15.00                  |
| Days after Synthesis Delivered = 12                      | Desired uCi = 45.0                  |
| Decay on Day Delivered = 0.8706                          | Desired mg = 0.400                  |
| Total uCi in Dose Sol on Day Delivered = 57.82           | Estimated Desired nmol = 397.1      |
| uCi/uL in Dose Sol on Day Delivered = 0.9158             | <b>Date of Delivery = 10/15/07</b>  |
| mg delivered = 0.391                                     | <b>uL delivered (actual) = 48.0</b> |
| uCi delivered = 43.96                                    | <b>Date of Counting = 10/15/07</b>  |
| Estimated nmol delivered = 387.94                        | <b>Dose Calculator</b>              |
| Days after Synthesis Counted = 12                        | uL Hot to Deliver = 22.47           |
| Decay on Day Counted = 0.8706                            | uL Cold to Deliver = 26.66          |
| Specific Activity from Amersham Specs (cpm/fmol) = 0.201 | Total uL to Deliver = 49.14         |
| Avg. Volume of Standard (uL)* = 3.0                      | Hot to Cold Ratio = 0.84            |
| Avg. CPM-bkgd of Standard = 3,940,350                    | Total uL to Make = 63.14            |
| Specific Activity from Standards: (CPM/fmol) = 0.163     | Dose Solution uL Hot = 28.88        |
| Date of Disposal from Decay Storage = 05/25/09           | Dose Solution uL Cold = 34.26       |

**Table A05: Intranasal Oxytocin Rat 5 Data**

| Oxytocin Rat 5    | Route | Com-pound | Volume (uL) | uCi   | mg    | Time (min) | Perfused @ (min) |
|-------------------|-------|-----------|-------------|-------|-------|------------|------------------|
| Amount Delivered: | IN    | Oxytocin  | 49          | 45.00 | 0.400 | 14:02:00   | 34:00:00         |

| Tissue Description           | Tube # | Tube (g) | Tissue + Tube (g) | Tissue Weight (g) | CPM     | CPM -25 bkgd | nM (Spec. Act.)   | nM (Stan.)        |
|------------------------------|--------|----------|-------------------|-------------------|---------|--------------|-------------------|-------------------|
| Dorsal Dura                  | 1      | 3.07509  | 3.08809           | 0.01300           | 1352    | 1327         | 507.25            | 628.11            |
| Ventral Dura                 | 2      | 3.03766  | 3.04844           | 0.01078           | 704     | 679          | 313.00            | 387.58            |
| Trigeminal Ganglion          | 3      | 2.98708  | 3.00927           | 0.02219           | 4236    | 4211         | 943.02            | 1,167.72          |
| Maxillary Nerve              | 4      | 3.00777  | 3.01839           | 0.01062           | 2935    | 2910         | 1,361.64          | 1,686.08          |
| Ophthalmic Nerve             | 5      | 2.99020  | 2.99642           | 0.00622           | 391     | 366          | 292.40            | 362.08            |
| Mandibular Nerve             | 6      | 2.99419  | 2.99910           | 0.00491           | 884     | 859          | 869.37            | 1,076.52          |
| Upper Cervical Spinal Cord   | 7      | 3.00853  | 3.05267           | 0.04414           | 494     | 469          | 52.80             | 65.38             |
| Olfactory Bulbs              | 8      | 2.98361  | 3.06209           | 0.07848           | 882     | 857          | 54.26             | 6.72              |
| Anterior Olfactory Nucleus   | 9      | 2.98357  | 3.01825           | 0.03468           | 207     | 182          | 26.08             | 32.29             |
| Frontal Cortex               | 10     | 3.03825  | 3.07622           | 0.03797           | 187     | 162          | 21.20             | 26.25             |
| Caudate/Putamen              | 11     | 3.01235  | 3.02010           | 0.00775           | 115     | 90           | 57.71             | 71.46             |
| Septal Nucleus               | 12     | 3.01369  | 3.02448           | 0.01079           | 72      | 47           | 21.65             | 26.80             |
| Parietal Cortex              | 13     | 2.98705  | 3.00070           | 0.01365           | 106     | 81           | 29.49             | 36.51             |
| Hippocampus                  | 14     | 2.96960  | 3.01084           | 0.04124           | 97      | 72           | 8.68              | 10.74             |
| Thalamus                     | 15     | 2.99412  | 3.07537           | 0.08125           | 180     | 155          | 9.48              | 11.74             |
| Hypothalamus                 | 16     | 3.03802  | 3.06832           | 0.03030           | 209     | 184          | 30.18             | 37.37             |
| Midbrain                     | 17     | 3.04764  | 3.17636           | 0.12872           | 422     | 397          | 15.33             | 18.98             |
| Pons                         | 18     | 3.03169  | 3.10153           | 0.06984           | 296     | 271          | 19.28             | 23.88             |
| Medulla                      | 19     | 3.00957  | 3.09885           | 0.08928           | 343     | 318          | 17.70             | 21.92             |
| Cerebellum                   | 20     | 3.00946  | 3.25237           | 0.24291           | 997     | 972          | 19.88             | 24.62             |
| Superficial Nodes (2)        | 21     | 3.00817  | 3.08889           | 0.08072           | 8810    | 8785         | 540.82            | 669.69            |
| Cervical Nodes (2)           | 22     | 2.99429  | 3.00869           | 0.01440           | 320     | 295          | 101.80            | 126.06            |
| Thyroid                      | 23     | 2.99876  | 3.01918           | 0.02042           | 1586    | 1561         | 379.87            | 470.39            |
| Olfactory Epithelium         | 24     | 2.99339  | 3.06521           | 0.07182           | 135533  | 135508       | 9,375.89          | 11,609.94         |
| Respiratory Epithelium       | 25     | 3.04354  | 3.09709           | 0.05355           | 8076472 | 8076447      | 749,469.48        | 928,049.90        |
| Axillary Nodes (2)           | 26     | 2.98645  | 3.01369           | 0.02724           | 135     | 110          | 20.07             | 24.85             |
| Muscle (R, deltoid)          | 27     | 2.96714  | 2.99128           | 0.02414           | 83      | 58           | 11.94             | 14.78             |
| Liver (R, superficial lobe)  | 28     | 2.97421  | 3.00503           | 0.03082           | 178     | 153          | 24.67             | 30.55             |
| Kidney (L, tip)              | 29     | 2.98985  | 3.02860           | 0.03875           | 318     | 293          | 37.57             | 46.53             |
| Lung (R, top lobe)           | 30     | 2.97733  | 3.01025           | 0.03292           | 114     | 89           | 13.43             | 16.64             |
| Trachea (near cut-off)       | 31     | 2.98949  | 3.00806           | 0.01857           | 147     | 122          | 32.65             | 40.43             |
| Esophagus (near cut-off)     | 32     | 3.05999  | 3.07597           | 0.01598           | 161     | 136          | 42.29             | 52.37             |
| Spleen (tip)                 | 33     | 3.01004  | 3.04714           | 0.03710           | 259     | 234          | 31.34             | 38.81             |
| Heart                        | 34     | 3.02561  | 3.04464           | 0.01903           | 93      | 68           | 17.76             | 21.99             |
| Urine (fill to line of tube) | 35     | 2.95460  | 3.19151           | 0.23691           | 1332    | 1307         | 27.41             | 33.95             |
| Spinal Dura                  | 36     | 2.97607  | 2.99215           | 0.01608           | 76      | 51           | 15.76             | 19.52             |
| Lower Cervical Spinal Cord   | 37     | 2.98224  | 3.10932           | 0.12708           | 116     | 91           | 3.56              | 4.41              |
| Thoracic Spinal Cord         | 38     | 2.99307  | 3.08509           | 0.09202           | 122     | 97           | 5.24              | 6.49              |
| Lumbar Spinal Cord           | 39     | 2.97664  | 3.10756           | 0.13092           | 123     | 98           | 3.72              | 4.61              |
| Blood Sample                 | 40     | 2.98491  | 3.23403           | 0.24912           | 3796    | 3771         | 75.22             | 93.14             |
| Drug Standard                | 41     | 2.99100  | 2.99392           | 0.00292           | 3930989 | 3930964      | 6,689,740.82      | 8,283,744.02      |
| Drug Standard                | 42     | 3.02776  | 3.03062           | 0.00286           | 3977841 | 3977816      | 6,911,490.80      | 8,558,331.65      |
| Drug Standard                | 43     | 2.98891  | 2.99133           | 0.00242           | 3912295 | 3912270      | 8,033,532.05      | 9,947,728.15      |
|                              |        |          |                   |                   |         |              | 0.201<br>cpm/fmol | 0.163<br>cpm/fmol |

| Auto Calculations                                        | Enter Values                        |
|----------------------------------------------------------|-------------------------------------|
| Total uL of Dose Sol = 63.1                              | Oxytocin Molecular Weight = 1,007   |
| Hot mg = 0.0000                                          | Date of Synthesis = 10/03/07        |
| Cold mg = 0.5139                                         | Hot uCi/uL at Synthesis = 2.300     |
| Total mg in Dose Sol = 0.5140                            | Hot uCi/ug at Synthesis = 1985.72   |
| Conc Of Dose Sol (ug/uL) = 8.1402                        | Cold ug/uL = 15.00                  |
| Days after Synthesis Delivered = 12                      | Desired uCi = 45.0                  |
| Decay on Day Delivered = 0.8706                          | Desired mg = 0.400                  |
| Total uCi in Dose Sol on Day Delivered = 57.82           | Estimated Desired nmol = 397.1      |
| uCi/uL in Dose Sol on Day Delivered = 0.9158             | <b>Date of Delivery = 10/15/07</b>  |
| mg delivered = 0.400                                     | <b>uL delivered (actual) = 49.1</b> |
| uCi delivered = 45.00                                    | <b>Date of Counting = 10/15/07</b>  |
| Estimated nmol delivered = 397.15                        | <b>Dose Calculator</b>              |
| Days after Synthesis Counted = 12                        | uL Hot to Deliver = 22.47           |
| Decay on Day Counted = 0.8706                            | uL Cold to Deliver = 26.66          |
| Specific Activity from Amersham Specs (cpm/fmol) = 0.201 | Total uL to Deliver = 49.14         |
| Avg. Volume of Standard (uL)* = 3.0                      | Hot to Cold Ratio = 0.84            |
| Avg. CPM-bkgd of Standard = 3,940,350                    | Total uL to Make = 63.14            |
| Specific Activity from Standards: (CPM/fmol) = 0.163     | Dose Solution uL Hot = 28.88        |
| Date of Disposal from Decay Storage = 05/25/09           | Dose Solution uL Cold = 34.26       |

**Table A06: Intranasal Oxytocin Rat 6 Data**

| Oxytocin Rat 6    | Route | Com-pound | Volume (uL) | uCi   | mg    | Time (min) | Perfused @ (min) |
|-------------------|-------|-----------|-------------|-------|-------|------------|------------------|
| Amount Delivered: | IN    | Oxytocin  | 49          | 45.00 | 0.400 | 14:03:00   | 30:57:00         |

| Tissue Description           | Tube # | Tube (g) | Tissue + Tube (g) | Tissue Weight (g) | CPM     | CPM -25 bkgd | nM (Spec. Act.)   | nM (Stan.)        |
|------------------------------|--------|----------|-------------------|-------------------|---------|--------------|-------------------|-------------------|
| Dorsal Dura                  | 1      | 2.98734  | 2.99610           | 0.00876           | 3080    | 3055         | 1,733.01          | 2,158.63          |
| Ventral Dura                 | 2      | 3.00782  | 3.01438           | 0.00656           | 370     | 345          | 261.34            | 325.53            |
| Trigeminal Ganglion          | 3      | 2.99584  | 3.02547           | 0.02963           | 1718    | 1693         | 283.93            | 353.67            |
| Maxillary Nerve              | 4      | 2.99307  | 3.00970           | 0.01663           | 2063    | 2038         | 608.98            | 758.55            |
| Ophthalmic Nerve             | 5      | 2.99163  | 2.99614           | 0.00451           | 120     | 95           | 104.67            | 130.38            |
| Mandibular Nerve             | 6      | 3.00305  | 3.00777           | 0.00472           | 277     | 252          | 265.31            | 330.47            |
| Upper Cervical Spinal Cord   | 7      | 3.01224  | 3.06331           | 0.05107           | 315     | 290          | 28.22             | 35.15             |
| Olfactory Bulbs              | 8      | 2.99614  | 3.07578           | 0.07964           | 512     | 487          | 30.39             | 37.85             |
| Anterior Olfactory Nucleus   | 9      | 3.01838  | 3.05841           | 0.04003           | 143     | 118          | 14.65             | 18.25             |
| Frontal Cortex               | 10     | 2.99642  | 3.03442           | 0.03800           | 135     | 110          | 14.38             | 17.92             |
| Caudate/Putamen              | 11     | 2.98825  | 3.00107           | 0.01282           | 81      | 56           | 21.71             | 27.04             |
| Septal Nucleus               | 12     | 2.99189  | 3.00573           | 0.01384           | 90      | 65           | 23.34             | 29.07             |
| Parietal Cortex              | 13     | 2.99225  | 3.02763           | 0.03538           | 96      | 71           | 9.97              | 12.42             |
| Hippocampus                  | 14     | 3.00071  | 3.04819           | 0.04748           | 147     | 122          | 12.77             | 15.90             |
| Thalamus                     | 15     | 3.02225  | 3.10617           | 0.08392           | 151     | 126          | 7.46              | 9.29              |
| Hypothalamus                 | 16     | 3.01289  | 3.03193           | 0.01904           | 97      | 72           | 18.79             | 23.41             |
| Midbrain                     | 17     | 3.07539  | 3.13991           | 0.06452           | 149     | 124          | 9.55              | 11.90             |
| Pons                         | 18     | 2.99996  | 3.06981           | 0.06985           | 175     | 150          | 10.67             | 13.29             |
| Medulla                      | 19     | 3.01481  | 3.12522           | 0.11041           | 247     | 222          | 9.99              | 12.45             |
| Cerebellum                   | 20     | 2.99336  | 3.25738           | 0.26402           | 540     | 515          | 9.69              | 12.07             |
| Superficial Nodes (2)        | 21     | 2.99211  | 3.05619           | 0.06408           | 6101    | 6076         | 471.18            | 586.90            |
| Cervical Nodes (2)           | 22     | 3.04851  | 3.05885           | 0.01034           | 1486    | 1461         | 702.14            | 874.58            |
| Thyroid                      | 23     | 2.99260  | 3.01216           | 0.01956           | 1575    | 1550         | 393.78            | 490.49            |
| Olfactory Epithelium         | 24     | 2.99359  | 3.08248           | 0.08889           | 650043  | 650018       | 36,338.38         | 45,262.93         |
| Respiratory Epithelium       | 25     | 2.99536  | 3.02581           | 0.03045           | 4797645 | 4797620      | 782,945.67        | 975,233.73        |
| Axillary Nodes (2)           | 26     | 2.98853  | 3.02302           | 0.03449           | 123     | 98           | 14.12             | 17.59             |
| Muscle (R, deltoid)          | 27     | 3.02203  | 3.04927           | 0.02724           | 98      | 73           | 13.32             | 16.59             |
| Liver (R, superficial lobe)  | 28     | 2.97675  | 3.00588           | 0.02913           | 131     | 106          | 18.08             | 22.52             |
| Kidney (L, tip)              | 29     | 2.97149  | 3.00577           | 0.03428           | 378     | 353          | 51.17             | 63.74             |
| Lung (R, top lobe)           | 30     | 2.98457  | 3.00713           | 0.02256           | 94      | 69           | 15.20             | 18.93             |
| Trachea (near cut-off)       | 31     | 2.98926  | 3.00428           | 0.01502           | 100     | 75           | 24.81             | 30.91             |
| Esophagus (near cut-off)     | 32     | 2.99267  | 3.00597           | 0.01330           | 89      | 64           | 23.91             | 29.79             |
| Spleen (tip)                 | 33     | 2.98918  | 3.03013           | 0.04095           | 268     | 243          | 29.49             | 36.73             |
| Heart                        | 34     | 2.98141  | 3.01849           | 0.03708           | 122     | 97           | 13.00             | 16.19             |
| Urine (fill to line of tube) | 35     | 2.99221  | 3.24676           | 0.25455           | 5016    | 4991         | 97.43             | 121.36            |
| Spinal Dura                  | 36     | 2.97308  | 2.98449           | 0.01141           | 50      | 25           | 10.89             | 13.56             |
| Lower Cervical Spinal Cord   | 37     | 2.99126  | 3.12149           | 0.13023           | 129     | 104          | 3.97              | 4.94              |
| Thoracic Spinal Cord         | 38     | 2.97687  | 3.05706           | 0.08019           | 93      | 68           | 4.21              | 5.25              |
| Lumbar Spinal Cord           | 39     | 2.95765  | 3.09079           | 0.13314           | 112     | 87           | 3.25              | 4.04              |
| Blood Sample                 | 40     | 3.02175  | 3.27900           | 0.25725           | 3516    | 3491         | 67.44             | 84.00             |
| Drug Standard                | 41     | 2.99942  | 3.00244           | 0.00302           | 3829733 | 3829708      | 6,301,613.98      | 7,849,263.04      |
| Drug Standard                | 42     | 3.03916  | 3.04220           | 0.00304           | 4053669 | 4053644      | 6,626,208.53      | 8,253,576.59      |
| Drug Standard                | 43     | 2.99521  | 2.99781           | 0.00260           | 3806153 | 3806128      | 7,274,499.51      | 9,061,085.02      |
|                              |        |          |                   |                   |         |              | 0.201<br>cpm/fmol | 0.162<br>cpm/fmol |

| Auto Calculations                                        | Enter Values                        |
|----------------------------------------------------------|-------------------------------------|
| Total uL of Dose Sol = 63.4                              | Oxytocin Molecular Weight = 1,007   |
| Hot mg = 0.0000                                          | Date of Synthesis = 10/03/07        |
| Cold mg = 0.5133                                         | Hot uCi/uL at Synthesis = 2.300     |
| Total mg in Dose Sol = 0.5134                            | Hot uCi/ug at Synthesis = 1985.72   |
| Conc Of Dose Sol (ug/uL) = 8.0972                        | Cold ug/uL = 15.00                  |
| Days after Synthesis Delivered = 13                      | Desired uCi = 45.0                  |
| Decay on Day Delivered = 0.8606                          | Desired mg = 0.400                  |
| Total uCi in Dose Sol on Day Delivered = 57.75           | Estimated Desired nmol = 397.1      |
| uCi/uL in Dose Sol on Day Delivered = 0.9109             | <b>Date of Delivery = 10/16/07</b>  |
| mg delivered = 0.400                                     | <b>uL delivered (actual) = 49.4</b> |
| uCi delivered = 45.00                                    | <b>Date of Counting = 10/16/07</b>  |
| Estimated nmol delivered = 397.15                        | <b>Dose Calculator</b>              |
| Days after Synthesis Counted = 13                        | uL Hot to Deliver = 22.73           |
| Decay on Day Counted = 0.8606                            | uL Cold to Deliver = 26.66          |
| Specific Activity from Amersham Specs (cpm/fmol) = 0.201 | Total uL to Deliver = 49.40         |
| Avg. Volume of Standard (uL)* = 3.0                      | Hot to Cold Ratio = 0.85            |
| Avg. CPM-bkgd of Standard = 3,896,493                    | Total uL to Make = 63.40            |
| Specific Activity from Standards: (CPM/fmol) = 0.162     | Dose Solution uL Hot = 29.18        |
| Date of Disposal from Decay Storage = 05/25/09           | Dose Solution uL Cold = 34.22       |



**Table A07: Intranasal Oxytocin Rat 7 Data**

| Oxytocin Rat 7    | Route | Compound | Volume (uL) | uCi   | mg    | Time (min) | Perfused @ (min) |
|-------------------|-------|----------|-------------|-------|-------|------------|------------------|
| Amount Delivered: | IN    | Oxytocin | 49          | 45.00 | 0.400 | 14:02:00   | 30:55:00         |

| Tissue Description           | Tube # | Tube (g) | Tissue + Tube (g) | Tissue Weight (g) | CPM     | CPM -25 bkgd | nM (Spec. Act.)   | nM (Stan.)        |
|------------------------------|--------|----------|-------------------|-------------------|---------|--------------|-------------------|-------------------|
| Dorsal Dura                  | 1      | 3.00143  | 3.01445           | 0.01302           | 743     | 718          | 274.04            | 341.34            |
| Ventral Dura                 | 2      | 3.03889  | 3.05308           | 0.01419           | 2457    | 2432         | 851.68            | 1,060.84          |
| Trigeminal Ganglion          | 3      | 3.01833  | 3.04813           | 0.02980           | 1394    | 1369         | 228.29            | 284.35            |
| Maxillary Nerve              | 4      | 3.00502  | 3.01543           | 0.01041           | 613     | 588          | 280.69            | 349.62            |
| Ophthalmic Nerve             | 5      | 3.00414  | 3.01066           | 0.00652           | 588     | 563          | 429.10            | 534.48            |
| Mandibular Nerve             | 6      | 3.04754  | 3.05020           | 0.00266           | 546     | 521          | 973.31            | 1,212.35          |
| Upper Cervical Spinal Cord   | 7      | 3.07199  | 3.13451           | 0.06252           | 2787    | 2762         | 219.53            | 273.45            |
| Olfactory Bulbs              | 8      | 3.01556  | 3.08649           | 0.07093           | 1092    | 1067         | 74.75             | 93.11             |
| Anterior Olfactory Nucleus   | 9      | 2.98920  | 3.03208           | 0.04288           | 294     | 269          | 31.17             | 38.83             |
| Frontal Cortex               | 10     | 2.99824  | 3.03626           | 0.03802           | 270     | 245          | 32.02             | 39.89             |
| Caudate/Putamen              | 11     | 2.96956  | 2.98203           | 0.01247           | 243     | 218          | 86.87             | 108.21            |
| Septal Nucleus               | 12     | 3.08244  | 3.09405           | 0.01161           | 141     | 116          | 49.65             | 61.84             |
| Parietal Cortex              | 13     | 3.00368  | 3.03517           | 0.03149           | 353     | 328          | 51.76             | 64.47             |
| Hippocampus                  | 14     | 3.00483  | 3.03660           | 0.03177           | 184     | 159          | 24.87             | 30.98             |
| Thalamus                     | 15     | 2.98935  | 3.07033           | 0.08098           | 136     | 111          | 6.81              | 8.48              |
| Hypothalamus                 | 16     | 3.00812  | 3.03310           | 0.02498           | 144     | 119          | 23.67             | 29.49             |
| Midbrain                     | 17     | 2.99067  | 3.10912           | 0.11845           | 278     | 253          | 10.61             | 13.22             |
| Pons                         | 18     | 3.00421  | 3.06275           | 0.05854           | 262     | 237          | 20.12             | 25.06             |
| Medulla                      | 19     | 3.03855  | 3.13103           | 0.09248           | 670     | 645          | 34.66             | 43.17             |
| Cerebellum                   | 20     | 2.99897  | 3.24394           | 0.24497           | 703     | 678          | 13.75             | 17.13             |
| Superficial Nodes (2)        | 21     | 2.99014  | 3.07046           | 0.08032           | 11714   | 11689        | 723.18            | 900.79            |
| Cervical Nodes (2)           | 22     | 3.01158  | 3.02908           | 0.01750           | 1800    | 1775         | 504.03            | 627.81            |
| Thyroid                      | 23     | 2.98746  | 3.01921           | 0.03175           | 1184    | 1159         | 181.40            | 225.95            |
| Olfactory Epithelium         | 24     | 3.00199  | 3.13221           | 0.13022           | 1846303 | 1846278      | 70,455.11         | 87,758.58         |
| Respiratory Epithelium       | 25     | 2.99435  | 3.06898           | 0.07463           | 5109929 | 5109904      | 340,245.49        | 423,808.31        |
| Axillary Nodes (2)           | 26     | 2.98232  | 3.00642           | 0.02410           | 108     | 83           | 17.11             | 21.32             |
| Muscle (R, deltoid)          | 27     | 2.98155  | 3.00821           | 0.02666           | 72      | 47           | 8.76              | 10.91             |
| Liver (R, superficial lobe)  | 28     | 2.99971  | 3.03170           | 0.03199           | 114     | 89           | 13.83             | 17.22             |
| Kidney (L, tip)              | 29     | 2.97996  | 3.01906           | 0.03910           | 326     | 301          | 38.25             | 47.65             |
| Lung (R, top lobe)           | 30     | 2.97656  | 3.00601           | 0.02945           | 183     | 158          | 26.66             | 33.21             |
| Trachea (near cut-off)       | 31     | 2.99017  | 3.00413           | 0.01396           | 94      | 69           | 24.56             | 30.59             |
| Esophagus (near cut-off)     | 32     | 2.98646  | 3.00280           | 0.01634           | 81      | 56           | 17.03             | 21.21             |
| Spleen (tip)                 | 33     | 3.02206  | 3.06818           | 0.04612           | 170     | 145          | 15.62             | 19.46             |
| Heart                        | 34     | 2.99751  | 3.03415           | 0.03664           | 130     | 105          | 14.24             | 17.74             |
| Urine (fill to line of tube) | 35     | 2.97282  | 3.14263           | 0.16981           | 672     | 647          | 18.93             | 23.58             |
| Spinal Dura                  | 36     | 2.98490  | 2.99785           | 0.01295           | 83      | 58           | 22.26             | 27.72             |
| Lower Cervical Spinal Cord   | 37     | 3.06180  | 3.17139           | 0.10959           | 109     | 84           | 3.81              | 4.74              |
| Thoracic Spinal Cord         | 38     | 3.03043  | 3.11497           | 0.08454           | 213     | 188          | 11.05             | 13.76             |
| Lumbar Spinal Cord           | 39     | 2.99156  | 3.13669           | 0.14513           | 904     | 879          | 30.10             | 37.49             |
| Blood Sample                 | 40     | 2.98187  | 3.23717           | 0.25530           | 2320    | 2295         | 44.67             | 55.64             |
| Drug Standard                | 41     | 2.99942  | 3.00244           | 0.00302           | 3829733 | 3829708      | 6,301,613.98      | 7,849,263.04      |
| Drug Standard                | 42     | 3.03916  | 3.04220           | 0.00304           | 4053669 | 4053644      | 6,626,208.53      | 8,253,576.59      |
| Drug Standard                | 43     | 2.99521  | 2.99781           | 0.00260           | 3806153 | 3806128      | 7,274,499.51      | 9,061,085.02      |
|                              |        |          |                   |                   |         |              | 0.201<br>cpm/fmol | 0.162<br>cpm/fmol |

| Auto Calculations                                        | Enter Values                      |
|----------------------------------------------------------|-----------------------------------|
| Total uL of Dose Sol = 63.4                              | Oxytocin Molecular Weight = 1,007 |
| Hot mg = 0.0000                                          | Date of Synthesis = 10/03/07      |
| Cold mg = 0.5133                                         | Hot uCi/uL at Synthesis = 2.300   |
| Total mg in Dose Sol = 0.5134                            | Hot uCi/ug at Synthesis = 1985.72 |
| Conc Of Dose Sol (ug/uL) = 8.0972                        | Cold ug/uL = 15.00                |
| Days after Synthesis Delivered = 13                      | Desired uCi = 45.0                |
| Decay on Day Delivered = 0.8606                          | Desired mg = 0.400                |
| Total uCi in Dose Sol on Day Delivered = 57.75           | Estimated Desired nmol = 397.1    |
| uCi/uL in Dose Sol on Day Delivered = 0.9109             | Date of Delivery = 10/16/07       |
| mg delivered = 0.400                                     | uL delivered (actual) = 49.4      |
| uCi delivered = 45.00                                    | Date of Counting = 10/16/07       |
| Estimated nmol delivered = 397.15                        | <b>Dose Calculator</b>            |
| Days after Synthesis Counted = 13                        | uL Hot to Deliver = 22.73         |
| Decay on Day Counted = 0.8606                            | uL Cold to Deliver = 26.66        |
| Specific Activity from Amersham Specs (cpm/fmol) = 0.201 | Total uL to Deliver = 49.40       |
| Avg. Volume of Standard (uL)* = 3.0                      | Hot to Cold Ratio = 0.85          |
| Avg. CPM-bkgd of Standard = 3,896,493                    | Total uL to Make = 63.40          |
| Specific Activity from Standards: (CPM/fmol) = 0.162     | Dose Solution uL Hot = 29.18      |
| Date of Disposal from Decay Storage = 05/25/09           | Dose Solution uL Cold = 34.22     |

**Table A08: Intranasal Oxytocin Rat 8 Data**

| Oxytocin Rat 8    | Route | Com-pound | Volume (uL) | uCi   | mg    | Time (min) | Perfused @ (min) |
|-------------------|-------|-----------|-------------|-------|-------|------------|------------------|
| Amount Delivered: | IN    | Oxytocin  | 50          | 45.00 | 0.400 | 14:01      | 31:06            |

| Tissue Description           | Tube # | Tube (g) | Tissue + Tube (g) | Tissue Weight (g) | CPM     | CPM -25 bkgd | nM (Spec. Act.)   | nM (Stan.)        |
|------------------------------|--------|----------|-------------------|-------------------|---------|--------------|-------------------|-------------------|
| Dorsal Dura                  | 1      | 2.99634  | 3.00552           | 0.00918           | 436     | 411          | 222.48            | 268.27            |
| Ventral Dura                 | 2      | 3.00873  | 3.01637           | 0.00764           | 325     | 300          | 195.13            | 235.29            |
| Trigeminal Ganglion          | 3      | 2.99056  | 3.01996           | 0.02940           | 466     | 441          | 74.54             | 89.88             |
| Maxillary Nerve              | 4      | 2.99543  | 3.01055           | 0.01512           | 362     | 337          | 110.76            | 133.55            |
| Ophthalmic Nerve             | 5      | 3.02109  | 3.02472           | 0.00363           | 12199   | 12174        | 16,665.55         | 20,095.53         |
| Mandibular Nerve             | 6      | 3.03825  | 3.04355           | 0.00530           | 1204    | 1179         | 1,105.43          | 1,332.94          |
| Upper Cervical Spinal Cord   | 7      | 3.00577  | 3.08156           | 0.07579           | 841     | 816          | 53.50             | 64.51             |
| Olfactory Bulbs              | 8      | 3.01048  | 3.08696           | 0.07648           | 11856   | 11831        | 768.72            | 926.93            |
| Anterior Olfactory Nucleus   | 9      | 2.99541  | 3.02679           | 0.03138           | 522     | 497          | 78.70             | 94.90             |
| Frontal Cortex               | 10     | 2.98194  | 3.02436           | 0.04242           | 2308    | 2283         | 267.44            | 322.48            |
| Caudate/Putamen              | 11     | 2.98004  | 2.99271           | 0.01267           | 57      | 32           | 12.55             | 15.13             |
| Septal Nucleus               | 12     | 2.98957  | 3.00425           | 0.01468           | 91      | 66           | 22.34             | 26.94             |
| Parietal Cortex              | 13     | 2.98908  | 3.02036           | 0.03128           | 308     | 283          | 44.96             | 54.21             |
| Hippocampus                  | 14     | 3.08156  | 3.12236           | 0.04080           | 219     | 194          | 23.63             | 28.49             |
| Thalamus                     | 15     | 3.00938  | 3.09301           | 0.08363           | 847     | 822          | 48.84             | 58.90             |
| Hypothalamus                 | 16     | 3.08230  | 3.10521           | 0.02291           | 2779    | 2754         | 597.35            | 720.30            |
| Midbrain                     | 17     | 2.99078  | 3.07745           | 0.08667           | 1536    | 1511         | 86.63             | 104.46            |
| Pons                         | 18     | 3.08441  | 3.13994           | 0.05553           | 951     | 926          | 82.87             | 99.92             |
| Medulla                      | 19     | 2.96886  | 3.06608           | 0.09722           | 1480    | 1455         | 74.37             | 89.68             |
| Cerebellum                   | 20     | 2.99633  | 3.25071           | 0.25438           | 3318    | 3293         | 64.33             | 77.57             |
| Superficial Nodes (2)        | 21     | 3.01327  | 3.07715           | 0.06388           | 1084    | 1059         | 82.38             | 99.34             |
| Cervical Nodes (2)           | 22     | 3.01064  | 3.02379           | 0.01315           | 374     | 349          | 131.88            | 159.03            |
| Thyroid                      | 23     | 3.01364  | 3.03599           | 0.02235           | 1667    | 1642         | 365.08            | 440.22            |
| Olfactory Epithelium         | 24     | 2.99497  | 3.12088           | 0.12591           | 85308   | 85283        | 3,365.85          | 4,058.59          |
| Respiratory Epithelium       | 25     | 3.04287  | 3.11032           | 0.06745           | 2292664 | 2292639      | 168,906.67        | 203,669.72        |
| Axillary Nodes (2)           | 26     | 2.97735  | 3.02017           | 0.04282           | 328     | 303          | 35.16             | 42.40             |
| Muscle (R, deltoid)          | 27     | 2.97159  | 3.02376           | 0.05217           | 217     | 192          | 18.29             | 22.05             |
| Liver (R, superficial lobe)  | 28     | 2.99487  | 3.03949           | 0.04462           | 157     | 132          | 14.70             | 17.73             |
| Kidney (L, tip)              | 29     | 3.00151  | 3.05144           | 0.04993           | 517     | 492          | 48.97             | 59.04             |
| Lung (R, top lobe)           | 30     | 2.98258  | 3.02426           | 0.04168           | 167     | 142          | 16.93             | 20.41             |
| Trachea (near cut-off)       | 31     | 2.98989  | 2.99930           | 0.00941           | 107     | 82           | 43.30             | 52.22             |
| Esophagus (near cut-off)     | 32     | 2.96658  | 2.98238           | 0.01580           | 106     | 81           | 25.48             | 30.72             |
| Spleen (tip)                 | 33     | 2.99562  | 3.03197           | 0.03635           | 197     | 172          | 23.51             | 28.35             |
| Heart                        | 34     | 2.97068  | 3.00420           | 0.03352           | 185     | 160          | 23.72             | 28.60             |
| Urine (fill to line of tube) | 35     | 2.98206  | 3.29450           | 0.31244           | 5066    | 5041         | 80.18             | 96.68             |
| Spinal Dura                  | 36     | 3.06313  | 3.07664           | 0.01351           | 129     | 104          | 38.25             | 46.13             |
| Lower Cervical Spinal Cord   | 37     | 2.97303  | 3.08969           | 0.11666           | 121     | 96           | 4.09              | 4.93              |
| Thoracic Spinal Cord         | 38     | 2.99690  | 3.07914           | 0.08224           | 118     | 93           | 5.62              | 6.78              |
| Lumbar Spinal Cord           | 39     | 2.98986  | 3.14437           | 0.15451           | 464     | 439          | 14.12             | 17.02             |
| Blood Sample                 | 40     | 3.00277  | 3.25763           | 0.25486           | 2688    | 2663         | 51.92             | 62.61             |
| Drug Standard                | 41     | 3.02032  | 3.02322           | 0.00290           | 4076833 | 4076808      | 6,985,786.97      | 8,423,546.94      |
| Drug Standard                | 42     | 2.99939  | 3.00188           | 0.00249           | 3860255 | 3860230      | 7,703,833.92      | 9,289,376.69      |
| Drug Standard                | 43     | 2.99850  | 3.00167           | 0.00317           | 4009664 | 4009639      | 6,285,489.26      | 7,579,119.43      |
|                              |        |          |                   |                   |         |              | 0.201<br>cpm/fmol | 0.167<br>cpm/fmol |

| Auto Calculations                                        | Enter Values                        |
|----------------------------------------------------------|-------------------------------------|
| Total uL of Dose Sol = 63.9                              | Oxytocin Molecular Weight = 1,007   |
| Hot mg = 0.0000                                          | Date of Synthesis = 10/03/07        |
| Cold mg = 0.5121                                         | Hot uCi/uL at Synthesis = 2,300     |
| Total mg in Dose Sol = 0.5122                            | Hot uCi/ug at Synthesis = 1985.72   |
| Conc Of Dose Sol (ug/uL) = 8.0110                        | Cold ug/uL = 15.00                  |
| Days after Synthesis Delivered = 15                      | Desired uCi = 45.0                  |
| Decay on Day Delivered = 0.8409                          | Desired mg = 0.400                  |
| Total uCi in Dose Sol on Day Delivered = 57.62           | Estimated Desired nmol = 397.1      |
| uCi/uL in Dose Sol on Day Delivered = 0.9012             | <b>Date of Delivery = 10/18/07</b>  |
| mg delivered = 0.400                                     | <b>uL delivered (actual) = 49.9</b> |
| uCi delivered = 45.00                                    | <b>Date of Counting = 10/18/07</b>  |
| Estimated nmol delivered = 397.14                        | <b>Dose Calculator</b>              |
| Days after Synthesis Counted = 15                        | uL Hot to Deliver = 23.27           |
| Decay on Day Counted = 0.8409                            | uL Cold to Deliver = 26.66          |
| Specific Activity from Amersham Specs (cpm/fmol) = 0.201 | Total uL to Deliver = 49.93         |
| Avg. Volume of Standard (uL)* = 3.0                      | Hot to Cold Ratio = 0.87            |
| Avg. CPM-bkgd of Standard = 3,982,226                    | Total uL to Make = 63.93            |
| Specific Activity from Standards: (CPM/fmol) = 0.167     | Dose Solution uL Hot = 29.79        |
| Date of Disposal from Decay Storage = 05/25/09           | Dose Solution uL Cold = 34.14       |

**Table A09: Intranasal Oxytocin Rat 9 Data**

| Oxytocin Rat 9    | Route | Compound | Volume (uL) | uCi   | mg    | Time (min) | Perfused @ (min) |
|-------------------|-------|----------|-------------|-------|-------|------------|------------------|
| Amount Delivered: | IN    | Oxytocin | 50          | 45.00 | 0.400 | 14:12      | 30:57            |

| Tissue Description           | Tube # | Tube (g) | Tissue + Tube (g) | Tissue Weight (g) | CPM     | CPM -25 bkgd | nM (Spec. Act.)   | nM (Stan.)        |
|------------------------------|--------|----------|-------------------|-------------------|---------|--------------|-------------------|-------------------|
| Dorsal Dura                  | 1      | 2.98629  | 3.00004           | 0.01375           | 158     | 133          | 48.07             | 57.96             |
| Ventral Dura                 | 2      | 3.02130  | 3.03352           | 0.01222           | 130     | 105          | 42.70             | 51.49             |
| Trigeminal Ganglion          | 3      | 3.00034  | 3.03392           | 0.03358           | 8863    | 8838         | 1,307.88          | 1,577.05          |
| Maxillary Nerve              | 4      | 2.99655  | 3.00813           | 0.01158           | 2743    | 2718         | 1,166.36          | 1,406.42          |
| Ophthalmic Nerve             | 5      | 2.99334  | 2.99913           | 0.00579           | 2227    | 2202         | 1,889.87          | 2,278.83          |
| Mandibular Nerve             | 6      | 2.99843  | 3.00153           | 0.00310           | 6557    | 6532         | 10,470.74         | 12,625.75         |
| Upper Cervical Spinal Cord   | 7      | 2.99071  | 3.04418           | 0.05347           | 199     | 174          | 16.17             | 19.50             |
| Olfactory Bulbs              | 8      | 2.97611  | 3.05088           | 0.07477           | 6795    | 6770         | 449.94            | 542.54            |
| Anterior Olfactory Nucleus   | 9      | 2.98277  | 3.02543           | 0.04266           | 350     | 325          | 37.86             | 45.65             |
| Frontal Cortex               | 10     | 2.99432  | 3.03468           | 0.04036           | 504     | 479          | 58.98             | 71.11             |
| Caudate/Putamen              | 11     | 2.98398  | 2.99660           | 0.01262           | 80      | 55           | 21.66             | 26.11             |
| Septal Nucleus               | 12     | 2.98162  | 2.99741           | 0.01579           | 66      | 41           | 12.90             | 15.56             |
| Parietal Cortex              | 13     | 2.98879  | 3.02155           | 0.03276           | 199     | 174          | 26.39             | 31.83             |
| Hippocampus                  | 14     | 3.00336  | 3.04384           | 0.04048           | 88      | 63           | 7.73              | 9.33              |
| Thalamus                     | 15     | 2.97111  | 3.05846           | 0.08735           | 122     | 97           | 5.52              | 6.65              |
| Hypothalamus                 | 16     | 2.99297  | 3.01736           | 0.02439           | 119     | 94           | 19.15             | 23.09             |
| Midbrain                     | 17     | 2.97027  | 3.04218           | 0.07191           | 131     | 106          | 7.33              | 8.83              |
| Pons                         | 18     | 3.01895  | 3.08126           | 0.06231           | 122     | 97           | 7.74              | 9.33              |
| Medulla                      | 19     | 3.00848  | 3.11369           | 0.10521           | 182     | 157          | 7.42              | 8.94              |
| Cerebellum                   | 20     | 3.01957  | 3.26432           | 0.24475           | 385     | 360          | 7.31              | 8.81              |
| Superficial Nodes (2)        | 21     | 3.07405  | 3.13568           | 0.06163           | 1639    | 1614         | 130.14            | 156.92            |
| Cervical Nodes (2)           | 22     | 2.99077  | 3.00268           | 0.01191           | 610     | 585          | 244.08            | 294.32            |
| Thyroid                      | 23     | 2.99649  | 3.01941           | 0.02292           | 1070    | 1045         | 226.57            | 273.20            |
| Olfactory Epithelium         | 24     | 2.99889  | 3.07728           | 0.07839           | 31411   | 31386        | 1,989.61          | 2,399.10          |
| Respiratory Epithelium       | 25     | 3.06697  | 3.11579           | 0.04882           | 1469425 | 1469400      | 149,566.85        | 180,349.52        |
| Axillary Nodes (2)           | 26     | 2.98323  | 3.01603           | 0.03280           | 156     | 131          | 19.85             | 23.93             |
| Muscle (R, deltoid)          | 27     | 2.97637  | 3.01619           | 0.03982           | 150     | 125          | 15.60             | 18.81             |
| Liver (R, superficial lobe)  | 28     | 2.99565  | 3.04254           | 0.04689           | 178     | 153          | 16.21             | 19.55             |
| Kidney (L, tip)              | 29     | 2.95465  | 3.00396           | 0.04931           | 234     | 209          | 21.06             | 25.40             |
| Lung (R, top lobe)           | 30     | 2.99799  | 3.04333           | 0.04534           | 114     | 89           | 9.75              | 11.76             |
| Trachea (near cut-off)       | 31     | 2.96052  | 2.97460           | 0.01408           | 76      | 51           | 18.00             | 21.70             |
| Esophagus (near cut-off)     | 32     | 2.96476  | 2.97988           | 0.01512           | 79      | 54           | 17.75             | 21.40             |
| Spleen (tip)                 | 33     | 2.97935  | 3.01854           | 0.03919           | 185     | 160          | 20.29             | 24.46             |
| Heart                        | 34     | 2.98520  | 3.01892           | 0.03372           | 153     | 128          | 18.86             | 22.75             |
| Urine (fill to line of tube) | 35     | 2.99084  | 3.19256           | 0.20172           | 1562    | 1537         | 37.86             | 45.66             |
| Spinal Dura                  | 36     | 2.97368  | 2.98449           | 0.01081           | 254     | 229          | 105.27            | 126.94            |
| Lower Cervical Spinal Cord   | 37     | 2.99842  | 3.13042           | 0.13200           | 121     | 96           | 3.61              | 4.36              |
| Thoracic Spinal Cord         | 38     | 2.97885  | 3.06057           | 0.08172           | 168     | 143          | 8.70              | 10.49             |
| Lumbar Spinal Cord           | 39     | 3.00880  | 3.13016           | 0.12136           | 220     | 195          | 7.98              | 9.63              |
| Blood Sample                 | 40     | 2.98111  | 3.25589           | 0.27478           | 1686    | 1661         | 30.04             | 36.22             |
| Drug Standard                | 41     | 3.02032  | 3.02322           | 0.00290           | 4076833 | 4076808      | 6,985,786.97      | 8,423,546.94      |
| Drug Standard                | 42     | 2.99939  | 3.00188           | 0.00249           | 3860255 | 3860230      | 7,703,833.92      | 9,289,376.69      |
| Drug Standard                | 43     | 2.99850  | 3.00167           | 0.00317           | 4009664 | 4009639      | 6,285,489.26      | 7,579,119.43      |
|                              |        |          |                   |                   |         |              | 0.201<br>cpm/fmol | 0.167<br>cpm/fmol |

| Auto Calculations                                        | Enter Values                        |
|----------------------------------------------------------|-------------------------------------|
| Total uL of Dose Sol = 63.9                              | Oxytocin Molecular Weight = 1,007   |
| Hot mg = 0.0000                                          | Date of Synthesis = 10/03/07        |
| Cold mg = 0.5121                                         | Hot uCi/uL at Synthesis = 2.300     |
| Total mg in Dose Sol = 0.5122                            | Hot uCi/ug at Synthesis = 1985.72   |
| Conc Of Dose Sol (ug/uL) = 8.0110                        | Cold ug/uL = 15.00                  |
| Days after Synthesis Delivered = 15                      | Desired uCi = 45.0                  |
| Decay on Day Delivered = 0.8409                          | Desired mg = 0.400                  |
| Total uCi in Dose Sol on Day Delivered = 57.62           | Estimated Desired nmol = 397.1      |
| uCi/uL in Dose Sol on Day Delivered = 0.9012             | <b>Date of Delivery = 10/18/07</b>  |
| mg delivered = 0.400                                     | <b>uL delivered (actual) = 49.9</b> |
| uCi delivered = 45.00                                    | <b>Date of Counting = 10/18/07</b>  |
| Estimated nmol delivered = 397.14                        | <b>Dose Calculator</b>              |
| Days after Synthesis Counted = 15                        | uL Hot to Deliver = 23.27           |
| Decay on Day Counted = 0.8409                            | uL Cold to Deliver = 26.66          |
| Specific Activity from Amersham Specs (cpm/fmol) = 0.201 | Total uL to Deliver = 49.93         |
| Avg. Volume of Standard (uL)* = 3.0                      | Hot to Cold Ratio = 0.87            |
| Avg. CPM-bkgd of Standard = 3,982,226                    | Total uL to Make = 63.93            |
| Specific Activity from Standards: (CPM/fmol) = 0.167     | Dose Solution uL Hot = 29.79        |
| Date of Disposal from Decay Storage = 05/25/09           | Dose Solution uL Cold = 34.14       |

**Table A10: Intranasal Oxytocin Rat 10 Data**

| Oxytocin Rat 10   | Route | Compound | Volume (uL) | uCi   | mg    | Time (min) | Perfused @ (min) |
|-------------------|-------|----------|-------------|-------|-------|------------|------------------|
| Amount Delivered: | IN    | Oxytocin | 51          | 44.97 | 0.400 | 14:01      | 30:56            |

| Tissue Description           | Tube # | Tube (g) | Tissue + Tube (g) | Tissue Weight (g) | CPM      | CPM -25 bkgd   | nM (Spec. Act.) | nM (Stan.)    |
|------------------------------|--------|----------|-------------------|-------------------|----------|----------------|-----------------|---------------|
| Dorsal Dura                  | 1      | 3.01729  | 3.03344           | 0.01615           | 469      | 444            | 136.62          | 167.95        |
| Ventral Dura                 | 2      | 2.98284  | 2.99166           | 0.00882           | 221      | 196            | 110.43          | 135.75        |
| Trigeminal Ganglion          | 3      | -        | -                 | -                 | -        | -              | -               | -             |
| Maxillary Nerve              | 4      | 2.99591  | 3.00541           | 0.00950           | 206      | 181            | 94.68           | 116.39        |
| Ophthalmic Nerve             | 5      | 3.04605  | 3.04763           | 0.00158           | 37       | 12             | 37.74           | 46.40         |
| Mandibular Nerve             | 6      | 3.00484  | 3.00802           | 0.00318           | 89       | 64             | 100.01          | 122.95        |
| Upper Cervical Spinal Cord   | 7      | -        | -                 | -                 | -        | -              | -               | -             |
| Olfactory Bulbs              | 8      | -        | -                 | -                 | -        | -              | -               | -             |
| Anterior Olfactory Nucleus   | 9      | -        | -                 | -                 | -        | -              | -               | -             |
| Frontal Cortex               | 10     | -        | -                 | -                 | -        | -              | -               | -             |
| Caudate/Putamen              | 11     | -        | -                 | -                 | -        | -              | -               | -             |
| Septal Nucleus               | 12     | -        | -                 | -                 | -        | -              | -               | -             |
| Parietal Cortex              | 13     | -        | -                 | -                 | -        | -              | -               | -             |
| Hippocampus                  | 14     | -        | -                 | -                 | -        | -              | -               | -             |
| Thalamus                     | 15     | -        | -                 | -                 | -        | -              | -               | -             |
| Hypothalamus                 | 16     | -        | -                 | -                 | -        | -              | -               | -             |
| Midbrain                     | 17     | -        | -                 | -                 | -        | -              | -               | -             |
| Pons                         | 18     | -        | -                 | -                 | -        | -              | -               | -             |
| Medulla                      | 19     | -        | -                 | -                 | -        | -              | -               | -             |
| Cerebellum                   | 20     | -        | -                 | -                 | -        | -              | -               | -             |
| Superficial Nodes (2)        | 21     | 2.98388  | 3.05466           | 0.07078           | 3880     | 3855           | 270.65          | 332.72        |
| Cervical Nodes (2)           | 22     | 2.98960  | 2.99183           | 0.00223           | 65       | 40             | 89.13           | 109.58        |
| Thyroid                      | 23     | 2.97968  | 2.99319           | 0.01351           | 820      | 795            | 292.42          | 359.48        |
| Olfactory Epithelium         | 24     | 2.98784  | 3.07676           | 0.08892           | 54021    | 53996          | 3,017.56        | 3,709.62      |
| Respiratory Epithelium       | 25     | 3.03051  | 3.08806           | 0.05755           | 10404574 | 10404549       | 898,402.62      | 1,104,447.13  |
| Axillary Nodes (2)           | 26     | 2.96778  | 3.00651           | 0.03873           | 101      | 76             | 9.75            | 11.99         |
| Muscle (R, deltoid)          | 27     | 2.96092  | 3.00135           | 0.04043           | 74       | 49             | 6.02            | 7.40          |
| Liver (R, superficial lobe)  | 28     | 2.96079  | 3.00101           | 0.04022           | 70       | 45             | 5.56            | 6.83          |
| Kidney (L, tip)              | 29     | 2.96566  | 2.99818           | 0.03252           | 223      | 198            | 30.26           | 37.19         |
| Lung (R, top lobe)           | 30     | 3.00739  | 3.04567           | 0.03828           | 191      | 166            | 21.55           | 26.49         |
| Trachea (near cut-off)       | 31     | 2.97595  | 2.99284           | 0.01689           | 68       | 43             | 12.65           | 15.55         |
| Esophagus (near cut-off)     | 32     | 2.99180  | 3.00462           | 0.01282           | 53       | 28             | 10.85           | 13.34         |
| Spleen (tip)                 | 33     | 2.96780  | 3.01686           | 0.04906           | 132      | 107            | 10.84           | 13.32         |
| Heart                        | 34     | 2.97433  | 3.01919           | 0.04486           | 122      | 97             | 10.74           | 13.21         |
| Urine (fill to line of tube) | 35     | 2.99751  | 3.28215           | 0.28464           | 6259     | 6234           | 108.83          | 133.79        |
| Spinal Dura                  | 36     | 2.99599  | 3.01124           | 0.01525           | 60       | 35             | 11.40           | 14.02         |
| Lower Cervical Spinal Cord   | 37     | 3.02594  | 3.19956           | 0.17362           | 127      | 102            | 2.92            | 3.59          |
| Thoracic Spinal Cord         | 38     | 2.95332  | 3.03702           | 0.08370           | 65       | 40             | 2.37            | 2.92          |
| Lumbar Spinal Cord           | 39     | 3.00661  | 3.16945           | 0.16284           | 108      | 83             | 2.53            | 3.11          |
| Blood Sample                 | 40     | 2.98983  | 3.25695           | 0.26712           | 2416     | 2391           | 44.48           | 54.68         |
| Drug Standard                | 41     | 3.00922  | 3.01175           | 0.00253           | 3714866  | 3714841        | 7,296,469.75    | 8,969,881.51  |
| Drug Standard                | 42     | 3.00332  | 3.00586           | 0.00254           | 3769488  | 3769463        | 7,374,606.39    | 9,065,938.43  |
| Drug Standard                | 43     | 3.00648  | 3.00889           | 0.00241           | 3981110  | 3981085        | 8,208,758.61    | 10,091,399.63 |
|                              |        |          |                   |                   |          | 0.201 cpm/fmol | 0.164 cpm/fmol  |               |

| Auto Calculations                                        | Enter Values                        |
|----------------------------------------------------------|-------------------------------------|
| Total uL of Dose Sol = 65.0                              | Oxytocin Molecular Weight = 1,007   |
| Hot mg = 0.0000                                          | Date of Synthesis = 10/03/07        |
| Cold mg = 0.5097                                         | Hot uCi/uL at Synthesis = 2.300     |
| Total mg in Dose Sol = 0.5097                            | Hot uCi/ug at Synthesis = 1985.72   |
| Conc Of Dose Sol (ug/uL) = 7.8384                        | Cold ug/uL = 15.00                  |
| Days after Synthesis Delivered = 19                      | Desired uCi = 45.0                  |
| Decay on Day Delivered = 0.8030                          | Desired mg = 0.400                  |
| Total uCi in Dose Sol on Day Delivered = 57.35           | Estimated Desired nmol = 397.1      |
| uCi/uL in Dose Sol on Day Delivered = 0.8818             | <b>Date of Delivery = 10/22/07</b>  |
| mg delivered = 0.400                                     | <b>uL delivered (actual) = 51.0</b> |
| uCi delivered = 44.97                                    | <b>Date of Counting = 10/22/07</b>  |
| Estimated nmol delivered = 396.90                        | <b>Dose Calculator</b>              |
| Days after Synthesis Counted = 19                        | uL Hot to Deliver = 24.37           |
| Decay on Day Counted = 0.8030                            | uL Cold to Deliver = 26.66          |
| Specific Activity from Amersham Specs (cpm/fmol) = 0.201 | Total uL to Deliver = 51.03         |
| Avg. Volume of Standard (uL)* = 3.0                      | Hot to Cold Ratio = 0.91            |
| Avg. CPM-bkgd of Standard = 3,821,796                    | Total uL to Make = 65.03            |
| Specific Activity from Standards: (CPM/fmol) = 0.164     | Dose Solution uL Hot = 31.05        |
| Date of Disposal from Decay Storage = 05/25/09           | Dose Solution uL Cold = 33.98       |

**Table A11: Intranasal Oxytocin Rat 11 Data**

| Oxytocin Rat 11   | Route | Compound | Volume (uL) | uCi   | mg    | Time (min) | Perfused @ (min) |
|-------------------|-------|----------|-------------|-------|-------|------------|------------------|
| Amount Delivered: | IN    | Oxytocin | 51          | 44.97 | 0.400 | 14:00      | 30:45            |

| Tissue Description           | Tube # | Tube (g) | Tissue + Tube (g) | Tissue Weight (g) | CPM     | CPM -25 bkgd | nM (Spec. Act.)   | nM (Stan.)        |
|------------------------------|--------|----------|-------------------|-------------------|---------|--------------|-------------------|-------------------|
| Dorsal Dura                  | 1      | 2.99129  | 3.00410           | 0.01281           | 176     | 151          | 58.58             | 72.01             |
| Ventral Dura                 | 2      | 3.01307  | 3.02205           | 0.00898           | 194     | 169          | 93.52             | 114.97            |
| Trigeminal Ganglion          | 3      | -        | -                 | -                 | -       | -            | -                 | -                 |
| Maxillary Nerve              | 4      | 3.00436  | 3.01528           | 0.01092           | 970     | 945          | 430.03            | 528.66            |
| Ophthalmic Nerve             | 5      | 2.97142  | 2.97477           | 0.00335           | 92      | 67           | 99.39             | 122.18            |
| Mandibular Nerve             | 6      | 2.98258  | 2.98539           | 0.00281           | 86      | 61           | 107.87            | 132.61            |
| Upper Cervical Spinal Cord   | 7      | -        | -                 | -                 | -       | -            | -                 | -                 |
| Olfactory Bulbs              | 8      | -        | -                 | -                 | -       | -            | -                 | -                 |
| Anterior Olfactory Nucleus   | 9      | -        | -                 | -                 | -       | -            | -                 | -                 |
| Frontal Cortex               | 10     | -        | -                 | -                 | -       | -            | -                 | -                 |
| Caudate/Putamen              | 11     | -        | -                 | -                 | -       | -            | -                 | -                 |
| Septal Nucleus               | 12     | -        | -                 | -                 | -       | -            | -                 | -                 |
| Parietal Cortex              | 13     | -        | -                 | -                 | -       | -            | -                 | -                 |
| Hippocampus                  | 14     | -        | -                 | -                 | -       | -            | -                 | -                 |
| Thalamus                     | 15     | -        | -                 | -                 | -       | -            | -                 | -                 |
| Hypothalamus                 | 16     | -        | -                 | -                 | -       | -            | -                 | -                 |
| Midbrain                     | 17     | -        | -                 | -                 | -       | -            | -                 | -                 |
| Pons                         | 18     | -        | -                 | -                 | -       | -            | -                 | -                 |
| Medulla                      | 19     | -        | -                 | -                 | -       | -            | -                 | -                 |
| Cerebellum                   | 20     | -        | -                 | -                 | -       | -            | -                 | -                 |
| Superficial Nodes (2)        | 21     | 2.97657  | 3.03353           | 0.05696           | 2832    | 2807         | 244.89            | 301.05            |
| Cervical Nodes (2)           | 22     | 3.01228  | 3.02392           | 0.01164           | 315     | 290          | 123.80            | 152.20            |
| Thyroid                      | 23     | 2.99657  | 3.02019           | 0.02362           | 2252    | 2227         | 468.53            | 575.98            |
| Olfactory Epithelium         | 24     | 3.07249  | 3.17166           | 0.09917           | 123894  | 123869       | 6,206.91          | 7,630.44          |
| Respiratory Epithelium       | 25     | 3.02790  | 3.06689           | 0.03899           | 2641024 | 2640999      | 336,595.32        | 413,791.91        |
| Axillary Nodes (2)           | 26     | 2.99948  | 3.03787           | 0.03839           | 128     | 103          | 13.33             | 16.39             |
| Muscle (R, deltoid)          | 27     | 3.05953  | 3.09309           | 0.03356           | 826     | 801          | 118.61            | 145.81            |
| Liver (R, superficial lobe)  | 28     | 2.97227  | 3.00417           | 0.03190           | 175     | 150          | 23.37             | 28.73             |
| Kidney (L, tip)              | 29     | 2.96046  | 3.00701           | 0.04655           | 286     | 261          | 27.86             | 34.25             |
| Lung (R, top lobe)           | 30     | 2.99319  | 3.03294           | 0.03975           | 499     | 474          | 59.26             | 72.85             |
| Trachea (near cut-off)       | 31     | 2.99721  | 3.01536           | 0.01815           | 158     | 133          | 36.41             | 44.77             |
| Esophagus (near cut-off)     | 32     | 2.98504  | 2.99961           | 0.01457           | 92      | 67           | 22.85             | 28.09             |
| Spleen (tip)                 | 33     | 2.98754  | 3.02674           | 0.03920           | 177     | 152          | 19.27             | 23.69             |
| Heart                        | 34     | 2.96149  | 2.99169           | 0.03020           | 219     | 194          | 31.92             | 39.24             |
| Urine (fill to line of tube) | 35     | 2.98820  | 3.27221           | 0.28401           | 852     | 827          | 14.47             | 17.79             |
| Spinal Dura                  | 36     | 2.96613  | 2.97756           | 0.01143           | 130     | 105          | 45.65             | 56.12             |
| Lower Cervical Spinal Cord   | 37     | 2.97917  | 3.13065           | 0.15148           | 168     | 143          | 4.69              | 5.77              |
| Thoracic Spinal Cord         | 38     | 2.98783  | 3.07176           | 0.08393           | 114     | 89           | 5.27              | 6.48              |
| Lumbar Spinal Cord           | 39     | 2.99057  | 3.13195           | 0.14138           | 174     | 149          | 5.24              | 6.44              |
| Blood Sample                 | 40     | 3.00849  | 3.26801           | 0.25952           | 2986    | 2961         | 56.70             | 69.70             |
| Drug Standard                | 41     | 3.00922  | 3.01175           | 0.00253           | 3714866 | 3714841      | 7,296,469.75      | 8,969,881.51      |
| Drug Standard                | 42     | 3.00332  | 3.00586           | 0.00254           | 3769488 | 3769463      | 7,374,606.39      | 9,065,938.43      |
| Drug Standard                | 43     | 3.00648  | 3.00889           | 0.00241           | 3981110 | 3981085      | 8,208,758.61      | 10,091,399.63     |
|                              |        |          |                   |                   |         |              | 0.201<br>cpm/fmol | 0.164<br>cpm/fmol |

| Auto Calculations                                        | Enter Values                        |
|----------------------------------------------------------|-------------------------------------|
| Total uL of Dose Sol = 65.0                              | Oxytocin Molecular Weight = 1,007   |
| Hot mg = 0.0000                                          | Date of Synthesis = 10/03/07        |
| Cold mg = 0.5097                                         | Hot uCi/uL at Synthesis = 2.300     |
| Total mg in Dose Sol = 0.5097                            | Hot uCi/ug at Synthesis = 1985.72   |
| Conc Of Dose Sol (ug/uL) = 7.8384                        | Cold ug/uL = 15.00                  |
| Days after Synthesis Delivered = 19                      | Desired uCi = 45.0                  |
| Decay on Day Delivered = 0.8030                          | Desired mg = 0.400                  |
| Total uCi in Dose Sol on Day Delivered = 57.35           | Estimated Desired nmol = 397.1      |
| uCi/uL in Dose Sol on Day Delivered = 0.8818             | <b>Date of Delivery = 10/22/07</b>  |
| mg delivered = 0.400                                     | <b>uL delivered (actual) = 51.0</b> |
| uCi delivered = 44.97                                    | <b>Date of Counting = 10/22/07</b>  |
| Estimated nmol delivered = 396.90                        | <b>Dose Calculator</b>              |
| Days after Synthesis Counted = 19                        | uL Hot to Deliver = 24.37           |
| Decay on Day Counted = 0.8030                            | uL Cold to Deliver = 26.66          |
| Specific Activity from Amersham Specs (cpm/fmol) = 0.201 | Total uL to Deliver = 51.03         |
| Avg. Volume of Standard (uL)* = 3.0                      | Hot to Cold Ratio = 0.91            |
| Avg. CPM-bkgd of Standard = 3,821,796                    | Total uL to Make = 65.03            |
| Specific Activity from Standards: (CPM/fmol) = 0.164     | Dose Solution uL Hot = 31.05        |
| Date of Disposal from Decay Storage = 05/25/09           | Dose Solution uL Cold = 33.98       |

**Table A12: Intranasal Oxytocin Rat 12 Data**

| Oxytocin Rat 12   | Route | Compound | Volume (uL) | uCi   | mg    | Time (min) | Perfused @ (min) |
|-------------------|-------|----------|-------------|-------|-------|------------|------------------|
| Amount Delivered: | IN    | Oxytocin | 52          | 45.01 | 0.400 | 14:09      | 30:59            |

| Tissue Description           | Tube # | Tube (g) | Tissue + Tube (g) | Tissue Weight (g) | CPM     | CPM -25 bkgd | nM (Spec. Act.)   | nM (Stan.)        |
|------------------------------|--------|----------|-------------------|-------------------|---------|--------------|-------------------|-------------------|
| Dorsal Dura                  | 1      | 3.00438  | 3.01466           | 0.01028           | 1803    | 1778         | 859.47            | 1,065.61          |
| Ventral Dura                 | 2      | 3.02096  | 3.02943           | 0.00847           | 838     | 813          | 476.98            | 591.38            |
| Trigeminal Ganglion          | 3      | -        | -                 | -                 | -       | -            | -                 | -                 |
| Maxillary Nerve              | 4      | 3.00542  | 3.01646           | 0.01104           | 876     | 851          | 383.05            | 474.92            |
| Ophthalmic Nerve             | 5      | 2.99631  | 2.99893           | 0.00262           | 315     | 290          | 550.03            | 681.96            |
| Mandibular Nerve             | 6      | 3.00839  | 3.01121           | 0.00282           | 1682    | 1657         | 2,919.89          | 3,620.21          |
| Upper Cervical Spinal Cord   | 7      | -        | -                 | -                 | -       | -            | -                 | -                 |
| Olfactory Bulbs              | 8      | -        | -                 | -                 | -       | -            | -                 | -                 |
| Anterior Olfactory Nucleus   | 9      | -        | -                 | -                 | -       | -            | -                 | -                 |
| Frontal Cortex               | 10     | -        | -                 | -                 | -       | -            | -                 | -                 |
| Caudate/Putamen              | 11     | -        | -                 | -                 | -       | -            | -                 | -                 |
| Septal Nucleus               | 12     | -        | -                 | -                 | -       | -            | -                 | -                 |
| Parietal Cortex              | 13     | -        | -                 | -                 | -       | -            | -                 | -                 |
| Hippocampus                  | 14     | -        | -                 | -                 | -       | -            | -                 | -                 |
| Thalamus                     | 15     | -        | -                 | -                 | -       | -            | -                 | -                 |
| Hypothalamus                 | 16     | -        | -                 | -                 | -       | -            | -                 | -                 |
| Midbrain                     | 17     | -        | -                 | -                 | -       | -            | -                 | -                 |
| Pons                         | 18     | -        | -                 | -                 | -       | -            | -                 | -                 |
| Medulla                      | 19     | -        | -                 | -                 | -       | -            | -                 | -                 |
| Cerebellum                   | 20     | -        | -                 | -                 | -       | -            | -                 | -                 |
| Superficial Nodes (2)        | 21     | 2.99668  | 3.05700           | 0.06032           | 2727    | 2702         | 222.60            | 275.98            |
| Cervical Nodes (2)           | 22     | 2.99192  | 3.00821           | 0.01629           | 1220    | 1195         | 364.54            | 451.97            |
| Thyroid                      | 23     | 3.07397  | 3.09194           | 0.01797           | 1501    | 1476         | 408.16            | 506.06            |
| Olfactory Epithelium         | 24     | 3.08222  | 3.17885           | 0.09663           | 1963983 | 1963958      | 100,998.12        | 125,221.95        |
| Respiratory Epithelium       | 25     | 2.98673  | 3.04655           | 0.05982           | 4915079 | 4915054      | 408,295.85        | 506,223.29        |
| Axillary Nodes (2)           | 26     | 2.99043  | 3.03448           | 0.04405           | 110     | 85           | 9.59              | 11.89             |
| Muscle (R, deltoid)          | 27     | 2.99723  | 3.03316           | 0.03593           | 81      | 56           | 7.75              | 9.60              |
| Liver (R, superficial lobe)  | 28     | 2.96681  | 3.01067           | 0.04386           | 107     | 82           | 9.29              | 11.52             |
| Kidney (L, tip)              | 29     | 2.98937  | 3.03171           | 0.04234           | 263     | 238          | 27.93             | 34.63             |
| Lung (R, top lobe)           | 30     | 3.03066  | 3.07502           | 0.04436           | 106     | 81           | 9.07              | 11.25             |
| Trachea (near cut-off)       | 31     | 2.97855  | 2.99068           | 0.01213           | 45      | 20           | 8.19              | 10.16             |
| Esophagus (near cut-off)     | 32     | 2.98189  | 2.99739           | 0.01550           | 68      | 43           | 13.79             | 17.09             |
| Spleen (tip)                 | 33     | 2.98121  | 3.02594           | 0.04473           | 148     | 123          | 13.66             | 16.94             |
| Heart                        | 34     | 2.96955  | 3.00770           | 0.03815           | 96      | 71           | 9.25              | 11.47             |
| Urine (fill to line of tube) | 35     | 3.00372  | 3.22396           | 0.22024           | 2422    | 2397         | 54.08             | 67.06             |
| Spinal Dura                  | 36     | 2.95911  | 2.97247           | 0.01336           | 60      | 35           | 13.02             | 16.14             |
| Lower Cervical Spinal Cord   | 37     | 2.98551  | 3.11427           | 0.12876           | 102     | 77           | 2.97              | 3.68              |
| Thoracic Spinal Cord         | 38     | 2.98687  | 3.07296           | 0.08609           | 80      | 55           | 3.17              | 3.94              |
| Lumbar Spinal Cord           | 39     | 3.01100  | 3.14531           | 0.13431           | 74      | 49           | 1.81              | 2.25              |
| Blood Sample                 | 40     | 2.97819  | 3.23945           | 0.26126           | 1647    | 1622         | 30.85             | 38.25             |
| Drug Standard                | 41     | 2.98312  | 2.98591           | 0.00279           | 3674191 | 3674166      | 6,544,065.66      | 8,113,622.71      |
| Drug Standard                | 42     | 2.99071  | 2.99377           | 0.00306           | 3897735 | 3897710      | 6,329,671.54      | 7,847,807.38      |
| Drug Standard                | 43     | 3.05284  | 3.05511           | 0.00227           | 3608251 | 3608226      | 7,898,796.98      | 9,793,278.67      |
|                              |        |          |                   |                   |         |              | 0.201<br>cpm/fmol | 0.162<br>cpm/fmol |

| Auto Calculations                                        | Enter Values                        |
|----------------------------------------------------------|-------------------------------------|
| Total uL of Dose Sol = 65.9                              | Oxytocin Molecular Weight = 1,007   |
| Hot mg = 0.0000                                          | Date of Synthesis = 10/03/07        |
| Cold mg = 0.5079                                         | Hot uCi/uL at Synthesis = 2.300     |
| Total mg in Dose Sol = 0.5079                            | Hot uCi/ug at Synthesis = 1985.72   |
| Conc Of Dose Sol (ug/uL) = 7.7086                        | Cold ug/uL = 15.00                  |
| Days after Synthesis Delivered = 22                      | Desired uCi = 45.0                  |
| Decay on Day Delivered = 0.7756                          | Desired mg = 0.400                  |
| Total uCi in Dose Sol on Day Delivered = 57.14           | Estimated Desired nmol = 397.1      |
| uCi/uL in Dose Sol on Day Delivered = 0.8672             | <b>Date of Delivery = 10/25/07</b>  |
| mg delivered = 0.400                                     | <b>uL delivered (actual) = 51.9</b> |
| uCi delivered = 45.01                                    | <b>Date of Counting = 10/25/07</b>  |
| Estimated nmol delivered = 397.22                        | <b>Dose Calculator</b>              |
| Days after Synthesis Counted = 22                        | uL Hot to Deliver = 25.23           |
| Decay on Day Counted = 0.7756                            | uL Cold to Deliver = 26.66          |
| Specific Activity from Amersham Specs (cpm/fmol) = 0.201 | Total uL to Deliver = 51.89         |
| Avg. Volume of Standard (uL)* = 3.0                      | Hot to Cold Ratio = 0.95            |
| Avg. CPM-bkgd of Standard = 3,726,701                    | Total uL to Make = 65.89            |
| Specific Activity from Standards: (CPM/fmol) = 0.162     | Dose Solution uL Hot = 32.03        |
| Date of Disposal from Decay Storage = 05/25/09           | Dose Solution uL Cold = 33.86       |

**Table A13: Intranasal Oxytocin Rat 13 Data**

| Oxytocin Rat 13   | Route | Com-pound | Volume (uL) | uCi   | mg    | Time (min) | Perfused @ (min) |
|-------------------|-------|-----------|-------------|-------|-------|------------|------------------|
| Amount Delivered: | IN    | Oxytocin  | 52          | 45.01 | 0.400 | 14:02      | 31:04            |

| Tissue Description           | Tube # | Tube (g) | Tissue + Tube (g) | Tissue Weight (g) | CPM     | CPM -25 bkgd | nM (Spec. Act.)   | nM (Stan.)        |
|------------------------------|--------|----------|-------------------|-------------------|---------|--------------|-------------------|-------------------|
| Dorsal Dura                  | 1      | 3.02928  | 3.04847           | 0.01919           | 616     | 591          | 153.04            | 189.75            |
| Ventral Dura                 | 2      | 2.98636  | 2.99250           | 0.00614           | 518     | 493          | 399.00            | 494.70            |
| Trigeminal Ganglion          | 3      | -        | -                 | -                 | -       | -            | -                 | -                 |
| Maxillary Nerve              | 4      | 3.00240  | 3.01411           | 0.01171           | 1096    | 1071         | 454.49            | 563.50            |
| Ophthalmic Nerve             | 5      | 3.01410  | 3.01809           | 0.00399           | 223     | 198          | 246.60            | 305.74            |
| Mandibular Nerve             | 6      | 2.97053  | 2.97391           | 0.00338           | 291     | 266          | 391.07            | 484.87            |
| Upper Cervical Spinal Cord   | 7      | -        | -                 | -                 | -       | -            | -                 | -                 |
| Olfactory Bulbs              | 8      | -        | -                 | -                 | -       | -            | -                 | -                 |
| Anterior Olfactory Nucleus   | 9      | -        | -                 | -                 | -       | -            | -                 | -                 |
| Frontal Cortex               | 10     | -        | -                 | -                 | -       | -            | -                 | -                 |
| Caudate/Putamen              | 11     | -        | -                 | -                 | -       | -            | -                 | -                 |
| Septal Nucleus               | 12     | -        | -                 | -                 | -       | -            | -                 | -                 |
| Parietal Cortex              | 13     | -        | -                 | -                 | -       | -            | -                 | -                 |
| Hippocampus                  | 14     | -        | -                 | -                 | -       | -            | -                 | -                 |
| Thalamus                     | 15     | -        | -                 | -                 | -       | -            | -                 | -                 |
| Hypothalamus                 | 16     | -        | -                 | -                 | -       | -            | -                 | -                 |
| Midbrain                     | 17     | -        | -                 | -                 | -       | -            | -                 | -                 |
| Pons                         | 18     | -        | -                 | -                 | -       | -            | -                 | -                 |
| Medulla                      | 19     | -        | -                 | -                 | -       | -            | -                 | -                 |
| Cerebellum                   | 20     | -        | -                 | -                 | -       | -            | -                 | -                 |
| Supercervical Nodes (2)      | 21     | 2.99348  | 3.05048           | 0.05700           | 3739    | 3714         | 323.79            | 401.45            |
| Cervical Nodes (2)           | 22     | 2.99224  | 3.00365           | 0.01141           | 591     | 566          | 246.50            | 305.63            |
| Thyroid                      | 23     | 2.97242  | 2.98801           | 0.01559           | 1415    | 1390         | 443.06            | 549.32            |
| Olfactory Epithelium         | 24     | 2.98674  | 3.10075           | 0.11401           | 1791923 | 1791898      | 78,102.23         | 96,834.60         |
| Respiratory Epithelium       | 25     | 2.99999  | 3.09003           | 0.09004           | 7842143 | 7842118      | 432,803.70        | 536,609.21        |
| Axillary Nodes (2)           | 26     | 2.99767  | 3.03194           | 0.03427           | 144     | 119          | 17.26             | 21.39             |
| Muscle (R, deltoid)          | 27     | 2.97402  | 3.00155           | 0.02753           | 68      | 43           | 7.76              | 9.62              |
| Liver (R, superficial lobe)  | 28     | 2.97886  | 3.02031           | 0.04145           | 84      | 59           | 7.07              | 8.77              |
| Kidney (L, tip)              | 29     | 2.97189  | 3.00957           | 0.03768           | 345     | 320          | 42.20             | 52.32             |
| Lung (R, top lobe)           | 30     | 2.98475  | 3.01041           | 0.02566           | 84      | 59           | 11.43             | 14.17             |
| Trachea (near cut-off)       | 31     | 2.97853  | 2.99176           | 0.01323           | 52      | 27           | 10.14             | 12.57             |
| Esophagus (near cut-off)     | 32     | 2.96806  | 2.97743           | 0.00937           | 77      | 52           | 27.58             | 34.19             |
| Spleen (tip)                 | 33     | 2.96927  | 3.01640           | 0.04713           | 139     | 114          | 12.02             | 14.90             |
| Heart                        | 34     | 2.99834  | 3.02743           | 0.02909           | 83      | 58           | 9.91              | 12.28             |
| Urine (fill to line of tube) | 35     | 2.98575  | 3.19964           | 0.21389           | 1544    | 1519         | 35.29             | 43.75             |
| Spinal Dura                  | 36     | 2.97052  | 2.98297           | 0.01245           | 59      | 34           | 13.57             | 16.83             |
| Lower Cervical Spinal Cord   | 37     | 2.98991  | 3.12224           | 0.13233           | 87      | 62           | 2.33              | 2.89              |
| Thoracic Spinal Cord         | 38     | 2.96825  | 3.07240           | 0.10415           | 79      | 54           | 2.58              | 3.19              |
| Lumbar Spinal Cord           | 39     | 2.98239  | 3.12546           | 0.14307           | 77      | 52           | 1.81              | 2.24              |
| Blood Sample                 | 40     | 3.00366  | 3.27272           | 0.26906           | 1836    | 1811         | 33.45             | 41.47             |
| Drug Standard                | 41     | 2.98312  | 2.98591           | 0.00279           | 3674191 | 3674166      | 6,544,065.66      | 8,113,622.71      |
| Drug Standard                | 42     | 2.99071  | 2.99377           | 0.00306           | 3897735 | 3897710      | 6,329,671.54      | 7,847,807.38      |
| Drug Standard                | 43     | 3.05284  | 3.05511           | 0.00227           | 3608251 | 3608226      | 7,898,796.98      | 9,793,278.67      |
|                              |        |          |                   |                   |         |              | 0.201<br>cpm/fmol | 0.162<br>cpm/fmol |

| Auto Calculations                                        | Enter Values                        |
|----------------------------------------------------------|-------------------------------------|
| Total uL of Dose Sol = 65.9                              | Oxytocin Molecular Weight = 1,007   |
| Hot mg = 0.0000                                          | Date of Synthesis = 10/03/07        |
| Cold mg = 0.5079                                         | Hot uCi/uL at Synthesis = 2,300     |
| Total mg in Dose Sol = 0.5079                            | Hot uCi/ug at Synthesis = 1985.72   |
| Conc Of Dose Sol (ug/uL) = 7.7086                        | Cold ug/uL = 15.00                  |
| Days after Synthesis Delivered = 22                      | Desired uCi = 45.0                  |
| Decay on Day Delivered = 0.7756                          | Desired mg = 0.400                  |
| Total uCi in Dose Sol on Day Delivered = 57.14           | Estimated Desired nmol = 397.1      |
| uCi/uL in Dose Sol on Day Delivered = 0.8672             | <b>Date of Delivery = 10/25/07</b>  |
| mg delivered = 0.400                                     | <b>uL delivered (actual) = 51.9</b> |
| uCi delivered = 45.01                                    | <b>Date of Counting = 10/25/07</b>  |
| Estimated nmol delivered = 397.22                        | <b>Dose Calculator</b>              |
| Days after Synthesis Counted = 22                        | uL Hot to Deliver = 25.23           |
| Decay on Day Counted = 0.7756                            | uL Cold to Deliver = 26.66          |
| Specific Activity from Amersham Specs (cpm/fmol) = 0.201 | Total uL to Deliver = 51.89         |
| Avg. Volume of Standard (uL)* = 3.0                      | Hot to Cold Ratio = 0.95            |
| Avg. CPM-bkgd of Standard = 3,726,701                    | Total uL to Make = 65.89            |
| Specific Activity from Standards: (CPM/fmol) = 0.162     | Dose Solution uL Hot = 32.03        |
| Date of Disposal from Decay Storage = 05/25/09           | Dose Solution uL Cold = 33.86       |

**Table A14: Intranasal Oxytocin Rat 14 Data**

| Oxytocin Rat 14   | Route | Com-<br>pound | Volume<br>(uL) | uCi   | mg    | Time (min) | Perfused @ (min) |
|-------------------|-------|---------------|----------------|-------|-------|------------|------------------|
| Amount Delivered: | IN    | Oxytocin      | 53             | 45.01 | 0.400 | 14:00      | 30:50            |

| Tissue Description           | Tube # | Tube (g) | Tissue +<br>Tube (g) | Tissue<br>Weight (g) | CPM     | CPM -25<br>bkgd | nM<br>(Spec. Act.) | nM (Stan.)        |
|------------------------------|--------|----------|----------------------|----------------------|---------|-----------------|--------------------|-------------------|
| Dorsal Dura                  | 1      | 2.95456  | 2.96428              | 0.00972              | 223     | 198             | 101.23             | 127.57            |
| Ventral Dura                 | 2      | 2.97210  | 2.98115              | 0.00905              | 774     | 749             | 411.27             | 518.29            |
| Trigeminal Ganglion          | 3      | -        | -                    | -                    | -       | -               | -                  | -                 |
| Maxillary Nerve              | 4      | 2.96692  | 2.98381              | 0.01689              | 643     | 618             | 181.82             | 229.14            |
| Ophthalmic Nerve             | 5      | 2.98275  | 2.98613              | 0.00338              | 67      | 42              | 61.75              | 77.82             |
| Mandibular Nerve             | 6      | 2.98574  | 2.98990              | 0.00416              | 139     | 114             | 136.18             | 171.61            |
| Upper Cervical Spinal Cord   | 7      | -        | -                    | -                    | -       | -               | -                  | -                 |
| Olfactory Bulbs              | 8      | -        | -                    | -                    | -       | -               | -                  | -                 |
| Anterior Olfactory Nucleus   | 9      | -        | -                    | -                    | -       | -               | -                  | -                 |
| Frontal Cortex               | 10     | -        | -                    | -                    | -       | -               | -                  | -                 |
| Caudate/Putamen              | 11     | -        | -                    | -                    | -       | -               | -                  | -                 |
| Septal Nucleus               | 12     | -        | -                    | -                    | -       | -               | -                  | -                 |
| Parietal Cortex              | 13     | -        | -                    | -                    | -       | -               | -                  | -                 |
| Hippocampus                  | 14     | -        | -                    | -                    | -       | -               | -                  | -                 |
| Thalamus                     | 15     | -        | -                    | -                    | -       | -               | -                  | -                 |
| Hypothalamus                 | 16     | -        | -                    | -                    | -       | -               | -                  | -                 |
| Midbrain                     | 17     | -        | -                    | -                    | -       | -               | -                  | -                 |
| Pons                         | 18     | -        | -                    | -                    | -       | -               | -                  | -                 |
| Medulla                      | 19     | -        | -                    | -                    | -       | -               | -                  | -                 |
| Cerebellum                   | 20     | -        | -                    | -                    | -       | -               | -                  | -                 |
| Superficial Nodes (2)        | 21     | 2.97355  | 3.03348              | 0.05993              | 3228    | 3203            | 265.59             | 334.70            |
| Cervical Nodes (2)           | 22     | 2.97067  | 2.98421              | 0.01354              | 624     | 599             | 219.84             | 277.04            |
| Thyroid                      | 23     | 2.95828  | 2.97610              | 0.01782              | 1334    | 1309            | 365.03             | 460.01            |
| Olfactory Epithelium         | 24     | 2.97073  | 3.06035              | 0.08962              | 99274   | 99249           | 5,503.19           | 6,935.19          |
| Respiratory Epithelium       | 25     | 2.98318  | 3.02616              | 0.04298              | 8257396 | 8257371         | 954,703.39         | 1,203,130.30      |
| Axillary Nodes (2)           | 26     | 3.02979  | 3.07869              | 0.04890              | 251     | 226             | 22.97              | 28.94             |
| Muscle (R, deltoid)          | 27     | 3.00764  | 3.03589              | 0.02825              | 86      | 61              | 10.73              | 13.52             |
| Liver (R, superficial lobe)  | 28     | 3.00043  | 3.05477              | 0.05434              | 124     | 99              | 9.05               | 11.41             |
| Kidney (L, tip)              | 29     | 3.04644  | 3.08580              | 0.03936              | 535     | 510             | 64.39              | 81.14             |
| Lung (R, top lobe)           | 30     | 3.05026  | 3.08541              | 0.03515              | 94      | 69              | 9.75               | 12.29             |
| Trachea (near cut-off)       | 31     | 2.98657  | 3.00148              | 0.01491              | 105     | 80              | 26.66              | 33.60             |
| Esophagus (near cut-off)     | 32     | 3.01023  | 3.02247              | 0.01224              | 93      | 68              | 27.61              | 34.79             |
| Spleen (tip)                 | 33     | 2.98652  | 3.02728              | 0.04076              | 212     | 187             | 22.80              | 28.73             |
| Heart                        | 34     | 2.99828  | 3.03437              | 0.03609              | 133     | 108             | 14.87              | 18.74             |
| Urine (fill to line of tube) | 35     | 3.00854  | 3.34471              | 0.33617              | 5352    | 5327            | 78.74              | 99.23             |
| Spinal Dura                  | 36     | 2.98561  | 2.99978              | 0.01417              | 123     | 98              | 34.37              | 43.31             |
| Lower Cervical Spinal Cord   | 37     | 2.98221  | 3.11310              | 0.13089              | 108     | 83              | 3.15               | 3.97              |
| Thoracic Spinal Cord         | 38     | 3.01037  | 3.08746              | 0.07709              | 85      | 60              | 3.87               | 4.87              |
| Lumbar Spinal Cord           | 39     | 2.97499  | 3.13390              | 0.15891              | 131     | 106             | 3.31               | 4.18              |
| Blood Sample                 | 40     | 2.98868  | 3.25761              | 0.26893              | 2937    | 2912            | 53.81              | 67.81             |
| Drug Standard                | 41     | 2.99211  | 2.99489              | 0.00278              | 3534344 | 3534319         | 6,317,627.66       | 7,961,560.99      |
| Drug Standard                | 42     | 2.98650  | 2.98904              | 0.00254              | 3516161 | 3516136         | 6,878,995.50       | 8,669,004.44      |
| Drug Standard                | 43     | 2.97921  | 2.98207              | 0.00286              | 3701829 | 3701804         | 6,431,917.49       | 8,105,590.60      |
|                              |        |          |                      |                      |         |                 | 0.201<br>cpm/fmol  | 0.160<br>cpm/fmol |

| Auto Calculations                                        | Enter Values                        |
|----------------------------------------------------------|-------------------------------------|
| Total uL of Dose Sol = 67.1                              | Oxytocin Molecular Weight = 1,007   |
| Hot mg = 0.0000                                          | Date of Synthesis = 10/03/07        |
| Cold mg = 0.5055                                         | Hot uCi/uL at Synthesis = 2,300     |
| Total mg in Dose Sol = 0.5055                            | Hot uCi/ug at Synthesis = 1985.72   |
| Conc Of Dose Sol (ug/uL) = 7.5354                        | Cold ug/uL = 15.00                  |
| Days after Synthesis Delivered = 26                      | Desired uCi = 45.0                  |
| Decay on Day Delivered = 0.7406                          | Desired mg = 0.400                  |
| Total uCi in Dose Sol on Day Delivered = 56.87           | Estimated Desired nmol = 397.1      |
| uCi/uL in Dose Sol on Day Delivered = 0.8477             | <b>Date of Delivery = 10/29/07</b>  |
| mg delivered = 0.400                                     | <b>uL delivered (actual) = 53.1</b> |
| uCi delivered = 45.01                                    | <b>Date of Counting = 10/29/07</b>  |
| Estimated nmol delivered = 397.27                        | <b>Dose Calculator</b>              |
| Days after Synthesis Counted = 26                        | uL Hot to Deliver = 26.42           |
| Decay on Day Counted = 0.7406                            | uL Cold to Deliver = 26.66          |
| Specific Activity from Amersham Specs (cpm/fmol) = 0.201 | Total uL to Deliver = 53.08         |
| Avg. Volume of Standard (uL)* = 3.0                      | Hot to Cold Ratio = 0.99            |
| Avg. CPM-bkgd of Standard = 3,584,086                    | Total uL to Make = 67.08            |
| Specific Activity from Standards: (CPM/fmol) = 0.160     | Dose Solution uL Hot = 33.39        |
| Date of Disposal from Decay Storage = 05/25/09           | Dose Solution uL Cold = 33.70       |



**Table A15: Intranasal Oxytocin Rat 15 Data**

| Oxytocin Rat 15   | Route | Com-pound | Volume (uL) | uCi   | mg    | Time (min) | Perfused @ (min) |
|-------------------|-------|-----------|-------------|-------|-------|------------|------------------|
| Amount Delivered: | IN    | Oxytocin  | 53          | 45.01 | 0.400 | 14:00      | 31:19            |

| Tissue Description           | Tube # | Tube (g) | Tissue + Tube (g) | Tissue Weight (g) | CPM     | CPM -25 bkgd | nM (Spec. Act.)   | nM (Stan.)        |
|------------------------------|--------|----------|-------------------|-------------------|---------|--------------|-------------------|-------------------|
| Dorsal Dura                  | 1      | 2.98611  | 2.99863           | 0.01252           | 334     | 309          | 122.64            | 154.56            |
| Ventral Dura                 | 2      | 2.97834  | 2.98686           | 0.00852           | 308     | 283          | 165.06            | 208.01            |
| Trigeminal Ganglion          | 3      | -        | -                 | -                 | -       | -            | -                 | -                 |
| Maxillary Nerve              | 4      | 2.98734  | 2.99985           | 0.01251           | 181     | 156          | 61.97             | 78.09             |
| Ophthalmic Nerve             | 5      | 2.99807  | 3.00009           | 0.00202           | 72      | 47           | 115.62            | 145.71            |
| Mandibular Nerve             | 6      | 2.97417  | 2.97685           | 0.00268           | 105     | 80           | 148.34            | 186.94            |
| Upper Cervical Spinal Cord   | 7      | -        | -                 | -                 | -       | -            | -                 | -                 |
| Olfactory Bulbs              | 8      | -        | -                 | -                 | -       | -            | -                 | -                 |
| Anterior Olfactory Nucleus   | 9      | -        | -                 | -                 | -       | -            | -                 | -                 |
| Frontal Cortex               | 10     | -        | -                 | -                 | -       | -            | -                 | -                 |
| Caudate/Putamen              | 11     | -        | -                 | -                 | -       | -            | -                 | -                 |
| Septal Nucleus               | 12     | -        | -                 | -                 | -       | -            | -                 | -                 |
| Parietal Cortex              | 13     | -        | -                 | -                 | -       | -            | -                 | -                 |
| Hippocampus                  | 14     | -        | -                 | -                 | -       | -            | -                 | -                 |
| Thalamus                     | 15     | -        | -                 | -                 | -       | -            | -                 | -                 |
| Hypothalamus                 | 16     | -        | -                 | -                 | -       | -            | -                 | -                 |
| Midbrain                     | 17     | -        | -                 | -                 | -       | -            | -                 | -                 |
| Pons                         | 18     | -        | -                 | -                 | -       | -            | -                 | -                 |
| Medulla                      | 19     | -        | -                 | -                 | -       | -            | -                 | -                 |
| Cerebellum                   | 20     | -        | -                 | -                 | -       | -            | -                 | -                 |
| Superficial Nodes (2)        | 21     | 2.96129  | 3.02535           | 0.06406           | 2479    | 2454         | 190.36            | 239.90            |
| Cervical Nodes (2)           | 22     | 2.99088  | 3.00370           | 0.01282           | 276     | 251          | 97.29             | 122.61            |
| Thyroid                      | 23     | 3.00123  | 3.01840           | 0.01717           | 1336    | 1311         | 379.42            | 478.16            |
| Olfactory Epithelium         | 24     | 2.97353  | 3.06173           | 0.08820           | 95592   | 95567        | 5,384.34          | 6,785.42          |
| Respiratory Epithelium       | 25     | 2.99725  | 3.04879           | 0.05154           | 3298267 | 3298242      | 318,002.97        | 400,751.71        |
| Axillary Nodes (2)           | 26     | 2.98928  | 3.03053           | 0.04125           | 160     | 135          | 16.26             | 20.49             |
| Muscle (R, deltoid)          | 27     | 3.01352  | 3.05206           | 0.03854           | 1656    | 1631         | 210.30            | 265.02            |
| Liver (R, superficial lobe)  | 28     | 3.00248  | 3.03729           | 0.03481           | 728     | 703          | 100.36            | 126.47            |
| Kidney (L, tip)              | 29     | 2.99237  | 3.03659           | 0.04422           | 732     | 707          | 79.45             | 100.12            |
| Lung (R, top lobe)           | 30     | 3.00334  | 3.04413           | 0.04079           | 291     | 266          | 32.41             | 40.84             |
| Trachea (near cut-off)       | 31     | 3.01701  | 3.03208           | 0.01507           | 121     | 96           | 31.66             | 39.89             |
| Esophagus (near cut-off)     | 32     | 2.98629  | 2.99911           | 0.01282           | 64      | 39           | 15.12             | 19.05             |
| Spleen (tip)                 | 33     | 2.98300  | 3.03323           | 0.05023           | 265     | 240          | 23.74             | 29.92             |
| Heart                        | 34     | 3.00444  | 3.03380           | 0.02936           | 397     | 372          | 62.96             | 79.35             |
| Urine (fill to line of tube) | 35     | 3.02017  | 3.29361           | 0.27344           | 6406    | 6381         | 115.96            | 146.14            |
| Spinal Dura                  | 36     | 3.00088  | 3.02491           | 0.02403           | 157     | 132          | 27.30             | 34.40             |
| Lower Cervical Spinal Cord   | 37     | 2.99504  | 3.07816           | 0.08312           | 159     | 134          | 8.01              | 10.10             |
| Thoracic Spinal Cord         | 38     | 3.01772  | 3.09746           | 0.07974           | 261     | 236          | 14.71             | 18.53             |
| Lumbar Spinal Cord           | 39     | 2.99791  | 3.12184           | 0.12393           | 156     | 131          | 5.25              | 6.62              |
| Blood Sample                 | 40     | 3.00207  | 3.29856           | 0.29649           | 3547    | 3522         | 59.03             | 74.39             |
| Drug Standard                | 41     | 2.99211  | 2.99489           | 0.00278           | 3534344 | 3534319      | 6,317,627.66      | 7,961,560.99      |
| Drug Standard                | 42     | 2.98650  | 2.98904           | 0.00254           | 3516161 | 3516136      | 6,878,995.50      | 8,669,004.44      |
| Drug Standard                | 43     | 2.97921  | 2.98207           | 0.00286           | 3701829 | 3701804      | 6,431,917.49      | 8,105,590.60      |
|                              |        |          |                   |                   |         |              | 0.201<br>cpm/fmol | 0.160<br>cpm/fmol |

| Auto Calculations                                        | Enter Values                        |
|----------------------------------------------------------|-------------------------------------|
| Total uL of Dose Sol = 67.1                              | Oxytocin Molecular Weight = 1,007   |
| Hot mg = 0.0000                                          | Date of Synthesis = 10/03/07        |
| Cold mg = 0.5055                                         | Hot uCi/uL at Synthesis = 2,300     |
| Total mg in Dose Sol = 0.5055                            | Hot uCi/ug at Synthesis = 1985.72   |
| Conc Of Dose Sol (ug/uL) = 7.5354                        | Cold ug/uL = 15.00                  |
| Days after Synthesis Delivered = 26                      | Desired uCi = 45.0                  |
| Decay on Day Delivered = 0.7406                          | Desired mg = 0.400                  |
| Total uCi in Dose Sol on Day Delivered = 56.87           | Estimated Desired nmol = 397.1      |
| uCi/uL in Dose Sol on Day Delivered = 0.8477             | <b>Date of Delivery = 10/29/07</b>  |
| mg delivered = 0.400                                     | <b>uL delivered (actual) = 53.1</b> |
| uCi delivered = 45.01                                    | <b>Date of Counting = 10/29/07</b>  |
| Estimated nmol delivered = 397.27                        | <b>Dose Calculator</b>              |
| Days after Synthesis Counted = 26                        | uL Hot to Deliver = 26.42           |
| Decay on Day Counted = 0.7406                            | uL Cold to Deliver = 26.66          |
| Specific Activity from Amersham Specs (cpm/fmol) = 0.201 | Total uL to Deliver = 53.08         |
| Avg. Volume of Standard (uL)* = 3.0                      | Hot to Cold Ratio = 0.99            |
| Avg. CPM-bkgd of Standard = 3,584,086                    | Total uL to Make = 67.08            |
| Specific Activity from Standards: (CPM/fmol) = 0.160     | Dose Solution uL Hot = 33.39        |
| Date of Disposal from Decay Storage = 05/25/09           | Dose Solution uL Cold = 33.70       |

**Table A16: Intranasal Oxytocin Rat 16 Data**

| Oxytocin Rat 16   | Route | Compound | Volume (uL) | uCi   | mg    | Time (min) | Perfused @ (min) |  |
|-------------------|-------|----------|-------------|-------|-------|------------|------------------|--|
| Amount Delivered: | IN    | Oxytocin | 48          | 45.00 | 0.400 | 14:00      | 32:43            |  |

  

| Tissue Description           | Tube # | Tube (g) | Tissue + Tube (g) | Tissue Weight (g) | CPM     | CPM -25 bkgd | nM (Spec. Act.)   | nM (Stan.)        |
|------------------------------|--------|----------|-------------------|-------------------|---------|--------------|-------------------|-------------------|
| Dorsal Dura                  | 1      | 2.99507  | 3.00814           | 0.01307           | 479     | 454          | 172.61            | 200.81            |
| Ventral Dura                 | 2      | 3.00441  | 3.03776           | 0.03335           | 2042    | 2017         | 300.54            | 349.63            |
| Trigeminal Ganglion          | 3      | -        | -                 | -                 | -       | -            | -                 | -                 |
| Maxillary Nerve              | 4      | 2.99888  | 3.00882           | 0.00994           | 171     | 146          | 72.99             | 84.91             |
| Ophthalmic Nerve             | 5      | 3.00301  | 3.00532           | 0.00231           | 227     | 202          | 434.54            | 505.52            |
| Mandibular Nerve             | 6      | 2.98387  | 2.98706           | 0.00319           | 123     | 98           | 152.66            | 177.60            |
| Upper Cervical Spinal Cord   | 7      | -        | -                 | -                 | -       | -            | -                 | -                 |
| Olfactory Bulbs              | 8      | -        | -                 | -                 | -       | -            | -                 | -                 |
| Anterior Olfactory Nucleus   | 9      | -        | -                 | -                 | -       | -            | -                 | -                 |
| Frontal Cortex               | 10     | -        | -                 | -                 | -       | -            | -                 | -                 |
| Caudate/Putamen              | 11     | -        | -                 | -                 | -       | -            | -                 | -                 |
| Septal Nucleus               | 12     | -        | -                 | -                 | -       | -            | -                 | -                 |
| Parietal Cortex              | 13     | -        | -                 | -                 | -       | -            | -                 | -                 |
| Hippocampus                  | 14     | -        | -                 | -                 | -       | -            | -                 | -                 |
| Thalamus                     | 15     | -        | -                 | -                 | -       | -            | -                 | -                 |
| Hypothalamus                 | 16     | -        | -                 | -                 | -       | -            | -                 | -                 |
| Midbrain                     | 17     | -        | -                 | -                 | -       | -            | -                 | -                 |
| Pons                         | 18     | -        | -                 | -                 | -       | -            | -                 | -                 |
| Medulla                      | 19     | -        | -                 | -                 | -       | -            | -                 | -                 |
| Cerebellum                   | 20     | -        | -                 | -                 | -       | -            | -                 | -                 |
| Superficial Nodes (2)        | 21     | 3.00187  | 3.07912           | 0.07725           | 3183    | 3158         | 203.15            | 236.33            |
| Cervical Nodes (2)           | 22     | 3.01372  | 3.02020           | 0.00648           | 132     | 107          | 82.05             | 95.46             |
| Thyroid                      | 23     | 2.97467  | 2.99674           | 0.02207           | 2766    | 2741         | 617.16            | 717.97            |
| Olfactory Epithelium         | 24     | 2.99842  | 3.07036           | 0.07194           | 20277   | 20252        | 1,398.91          | 1,627.41          |
| Respiratory Epithelium       | 25     | 3.00536  | 3.06338           | 0.05802           | 8520706 | 8520681      | 729,776.14        | 848,976.47        |
| Axillary Nodes (2)           | 26     | 2.97058  | 3.01387           | 0.04329           | 3274    | 3249         | 372.95            | 433.87            |
| Muscle (R, deltoid)          | 27     | 2.98451  | 3.03852           | 0.05401           | 537     | 512          | 47.11             | 54.80             |
| Liver (R, superficial lobe)  | 28     | 2.97389  | 3.01398           | 0.04009           | 125     | 100          | 12.40             | 14.42             |
| Kidney (L, tip)              | 29     | 2.99197  | 3.02899           | 0.03702           | 320     | 295          | 39.60             | 46.07             |
| Lung (R, top lobe)           | 30     | 2.97576  | 3.00658           | 0.03082           | 145     | 120          | 19.35             | 22.51             |
| Trachea (near cut-off)       | 31     | 2.97354  | 2.98879           | 0.01525           | 82      | 57           | 18.57             | 21.61             |
| Esophagus (near cut-off)     | 32     | 2.99947  | 3.01608           | 0.01661           | 95      | 70           | 20.94             | 24.36             |
| Spleen (tip)                 | 33     | 3.00858  | 3.05307           | 0.04449           | 181     | 156          | 17.42             | 20.27             |
| Heart                        | 34     | 2.95714  | 2.98993           | 0.03279           | 114     | 89           | 13.49             | 15.69             |
| Urine (fill to line of tube) | 35     | 2.95944  | 3.26274           | 0.30330           | 10900   | 10875        | 178.18            | 207.28            |
| Spinal Dura                  | 36     | 2.95813  | 2.98058           | 0.02245           | 139     | 114          | 25.23             | 29.36             |
| Lower Cervical Spinal Cord   | 37     | 3.02500  | 3.17297           | 0.14797           | 390     | 365          | 12.26             | 14.26             |
| Thoracic Spinal Cord         | 38     | 2.98137  | 3.06330           | 0.08193           | 81      | 56           | 3.40              | 3.95              |
| Lumbar Spinal Cord           | 39     | 2.97909  | 3.12494           | 0.14585           | 151     | 126          | 4.29              | 4.99              |
| Blood Sample                 | 40     | 2.97981  | 3.26040           | 0.28059           | 3531    | 3506         | 62.09             | 72.23             |
| Drug Standard                | 41     | 2.99813  | 3.00077           | 0.00264           | 4594777 | 4594752      | 8,648,707.83      | 10,061,372.30     |
| Drug Standard                | 42     | 3.06522  | 3.06738           | 0.00216           | 3732919 | 3732894      | 8,587,860.55      | 9,990,586.35      |
| Drug Standard                | 43     | 2.98506  | 2.98782           | 0.00276           | 4635805 | 4635780      | 8,346,546.41      | 9,709,856.38      |
|                              |        |          |                   |                   |         |              | 0.201<br>cpm/fmol | 0.173<br>cpm/fmol |

| Auto Calculations                                        | Enter Values                        |
|----------------------------------------------------------|-------------------------------------|
| Total uL of Dose Sol = 61.7                              | Oxytocin Molecular Weight = 1,007   |
| Hot mg = 0.0000                                          | Date of Synthesis = 10/23/07        |
| Cold mg = 0.5174                                         | Hot uCi/uL at Synthesis = 2.320     |
| Total mg in Dose Sol = 0.5174                            | Hot uCi/ug at Synthesis = 1985.72   |
| Conc Of Dose Sol (ug/uL) = 8.3866                        | Cold ug/uL = 15.00                  |
| Days after Synthesis Delivered = 7                       | Desired uCi = 45.0                  |
| Decay on Day Delivered = 0.9223                          | Desired mg = 0.400                  |
| Total uCi in Dose Sol on Day Delivered = 58.21           | Estimated Desired nmol = 397.1      |
| uCi/uL in Dose Sol on Day Delivered = 0.9435             | <b>Date of Delivery = 10/30/07</b>  |
| mg delivered = 0.400                                     | <b>uL delivered (actual) = 47.7</b> |
| uCi delivered = 45.00                                    | <b>Date of Counting = 10/30/07</b>  |
| Estimated nmol delivered = 397.10                        | <b>Dose Calculator</b>              |
| Days after Synthesis Counted = 7                         | uL Hot to Deliver = 21.03           |
| Decay on Day Counted = 0.9223                            | uL Cold to Deliver = 26.67          |
| Specific Activity from Amersham Specs (cpm/fmol) = 0.201 | Total uL to Deliver = 47.69         |
| Avg. Volume of Standard (uL)* = 3.0                      | Hot to Cold Ratio = 0.79            |
| Avg. CPM-bkgd of Standard = 4,321,142                    | Total uL to Make = 61.69            |
| Specific Activity from Standards: (CPM/fmol) = 0.173     | Dose Solution uL Hot = 27.20        |
| Date of Disposal from Decay Storage = 06/14/09           | Dose Solution uL Cold = 34.49       |

**Table A17: Intranasal Oxytocin Rat 17 Data**

| Oxytocin Rat 17   | Route | Com-pound | Volume (uL) | uCi   | mg    | Time (min) | Perfused @ (min) |
|-------------------|-------|-----------|-------------|-------|-------|------------|------------------|
| Amount Delivered: | IN    | Oxytocin  | 48          | 45.00 | 0.400 | 14:05      | 31:14            |

| Tissue Description           | Tube # | Tube (g) | Tissue + Tube (g) | Tissue Weight (g) | CPM     | CPM -25 bkgd | nM (Spec. Act.)   | nM (Stan.)        |
|------------------------------|--------|----------|-------------------|-------------------|---------|--------------|-------------------|-------------------|
| Dorsal Dura                  | 1      | 2.97876  | 2.98855           | 0.00979           | 265     | 240          | 121.82            | 141.72            |
| Ventral Dura                 | 2      | 3.04210  | 3.04886           | 0.00676           | 245     | 220          | 161.72            | 188.14            |
| Trigeminal Ganglion          | 3      | -        | -                 | -                 | -       | -            | -                 | -                 |
| Maxillary Nerve              | 4      | 2.99183  | 3.00212           | 0.01029           | 589     | 564          | 272.37            | 316.86            |
| Ophthalmic Nerve             | 5      | 3.05208  | 3.05455           | 0.00247           | 111     | 86           | 173.02            | 201.28            |
| Mandibular Nerve             | 6      | 2.98876  | 2.99123           | 0.00247           | 174     | 149          | 299.77            | 348.73            |
| Upper Cervical Spinal Cord   | 7      | -        | -                 | -                 | -       | -            | -                 | -                 |
| Olfactory Bulbs              | 8      | -        | -                 | -                 | -       | -            | -                 | -                 |
| Anterior Olfactory Nucleus   | 9      | -        | -                 | -                 | -       | -            | -                 | -                 |
| Frontal Cortex               | 10     | -        | -                 | -                 | -       | -            | -                 | -                 |
| Caudate/Putamen              | 11     | -        | -                 | -                 | -       | -            | -                 | -                 |
| Septal Nucleus               | 12     | -        | -                 | -                 | -       | -            | -                 | -                 |
| Parietal Cortex              | 13     | -        | -                 | -                 | -       | -            | -                 | -                 |
| Hippocampus                  | 14     | -        | -                 | -                 | -       | -            | -                 | -                 |
| Thalamus                     | 15     | -        | -                 | -                 | -       | -            | -                 | -                 |
| Hypothalamus                 | 16     | -        | -                 | -                 | -       | -            | -                 | -                 |
| Midbrain                     | 17     | -        | -                 | -                 | -       | -            | -                 | -                 |
| Pons                         | 18     | -        | -                 | -                 | -       | -            | -                 | -                 |
| Medulla                      | 19     | -        | -                 | -                 | -       | -            | -                 | -                 |
| Cerebellum                   | 20     | -        | -                 | -                 | -       | -            | -                 | -                 |
| Superficial Nodes (2)        | 21     | 2.98719  | 3.05684           | 0.06965           | 1348    | 1323         | 94.39             | 109.81            |
| Cervical Nodes (2)           | 22     | 2.99393  | 3.00489           | 0.01096           | 961     | 936          | 424.38            | 493.70            |
| Thyroid                      | 23     | 2.98787  | 3.01230           | 0.02443           | 1962    | 1937         | 394.00            | 458.36            |
| Olfactory Epithelium         | 24     | 3.00087  | 3.10957           | 0.10870           | 69242   | 69217        | 3,164.29          | 3,681.14          |
| Respiratory Epithelium       | 25     | 2.99850  | 3.04087           | 0.04237           | 7164045 | 7164020      | 840,216.88        | 977,456.40        |
| Axillary Nodes (2)           | 26     | 2.95543  | 2.99138           | 0.03595           | 149     | 124          | 17.14             | 19.94             |
| Muscle (R, deltoid)          | 27     | 2.99774  | 3.03445           | 0.03671           | 99      | 74           | 10.02             | 11.65             |
| Liver (R, superficial lobe)  | 28     | 2.97897  | 3.02017           | 0.04120           | 93      | 68           | 8.20              | 9.54              |
| Kidney (L, tip)              | 29     | 2.96839  | 3.01352           | 0.04513           | 320     | 295          | 32.48             | 37.79             |
| Lung (R, top lobe)           | 30     | 3.02547  | 3.06470           | 0.03923           | 82      | 57           | 7.22              | 8.40              |
| Trachea (near cut-off)       | 31     | 3.02943  | 3.05200           | 0.02257           | 81      | 56           | 12.33             | 14.34             |
| Esophagus (near cut-off)     | 32     | 2.99041  | 3.00414           | 0.01373           | 67      | 42           | 15.20             | 17.68             |
| Spleen (tip)                 | 33     | 2.99787  | 3.04901           | 0.05114           | 121     | 96           | 9.33              | 10.85             |
| Heart                        | 34     | 2.97998  | 3.02009           | 0.04011           | 181     | 156          | 19.33             | 22.48             |
| Urine (fill to line of tube) | 35     | 2.97299  | 3.33491           | 0.36192           | 3131    | 3106         | 42.65             | 49.61             |
| Spinal Dura                  | 36     | 3.00385  | 3.02154           | 0.01769           | 82      | 57           | 16.01             | 18.63             |
| Lower Cervical Spinal Cord   | 37     | 2.99317  | 3.12905           | 0.13588           | 106     | 81           | 2.96              | 3.45              |
| Thoracic Spinal Cord         | 38     | 2.96548  | 3.05292           | 0.08744           | 70      | 45           | 2.56              | 2.98              |
| Lumbar Spinal Cord           | 39     | 2.96517  | 3.11356           | 0.14839           | 1153    | 1128         | 37.77             | 43.94             |
| Blood Sample                 | 40     | 3.01792  | 3.22225           | 0.20433           | 2215    | 2190         | 53.26             | 61.96             |
| Drug Standard                | 41     | 2.99813  | 3.00077           | 0.00264           | 4594777 | 4594752      | 8,648,707.83      | 10,061,372.30     |
| Drug Standard                | 42     | 3.06522  | 3.06738           | 0.00216           | 3732919 | 3732894      | 8,587,860.55      | 9,990,586.35      |
| Drug Standard                | 43     | 2.98506  | 2.98782           | 0.00276           | 4635805 | 4635780      | 8,346,546.41      | 9,709,856.38      |
|                              |        |          |                   |                   |         |              | 0.201<br>cpm/fmol | 0.173<br>cpm/fmol |

| Auto Calculations                                        | Enter Values                        |
|----------------------------------------------------------|-------------------------------------|
| Total uL of Dose Sol = 61.7                              | Oxytocin Molecular Weight = 1,007   |
| Hot mg = 0.0000                                          | Date of Synthesis = 10/23/07        |
| Cold mg = 0.5174                                         | Hot uCi/uL at Synthesis = 2.320     |
| Total mg in Dose Sol = 0.5174                            | Hot uCi/ug at Synthesis = 1985.72   |
| Conc Of Dose Sol (ug/uL) = 8.3866                        | Cold ug/uL = 15.00                  |
| Days after Synthesis Delivered = 7                       | Desired uCi = 45.0                  |
| Decay on Day Delivered = 0.9223                          | Desired mg = 0.400                  |
| Total uCi in Dose Sol on Day Delivered = 58.21           | Estimated Desired nmol = 397.1      |
| uCi/uL in Dose Sol on Day Delivered = 0.9435             | <b>Date of Delivery = 10/30/07</b>  |
| mg delivered = 0.400                                     | <b>uL delivered (actual) = 47.7</b> |
| uCi delivered = 45.00                                    | <b>Date of Counting = 10/30/07</b>  |
| Estimated nmol delivered = 397.19                        | <b>Dose Calculator</b>              |
| Days after Synthesis Counted = 7                         | uL Hot to Deliver = 21.03           |
| Decay on Day Counted = 0.9223                            | uL Cold to Deliver = 26.67          |
| Specific Activity from Amersham Specs (cpm/fmol) = 0.201 | Total uL to Deliver = 47.69         |
| Avg. Volume of Standard (uL)* = 3.0                      | Hot to Cold Ratio = 0.79            |
| Avg. CPM-bkgd of Standard = 4,321,142                    | Total uL to Make = 61.69            |
| Specific Activity from Standards: (CPM/fmol) = 0.173     | Dose Solution uL Hot = 27.20        |
| Date of Disposal from Decay Storage = 06/14/09           | Dose Solution uL Cold = 34.49       |

**Table A18: Intranasal Oxytocin Rat 18 Data**

| Oxytocin Rat 18   |  | Route | Com-pound | Volume (uL) | uCi   | mg    | Time (min) | Perfused @ (min) |  |
|-------------------|--|-------|-----------|-------------|-------|-------|------------|------------------|--|
| Amount Delivered: |  | IN    | Oxytocin  | 48          | 45.00 | 0.400 | 14:00      | 31:25            |  |

  

| Tissue Description           | Tube # | Tube (g) | Tissue + Tube (g) | Tissue Weight (g) | CPM     | CPM -25 bkgd | nM (Spec. Act.)   | nM (Stan.)        |
|------------------------------|--------|----------|-------------------|-------------------|---------|--------------|-------------------|-------------------|
| Dorsal Dura                  | 1      | 2.99980  | 3.01309           | 0.01329           | 439     | 414          | 154.80            | 176.51            |
| Ventral Dura                 | 2      | 2.99775  | 3.00405           | 0.00630           | 140     | 115          | 90.71             | 103.43            |
| Trigeminal Ganglion          | 3      | 2.96762  | 2.99835           | 0.03073           | 349     | 324          | 52.39             | 59.74             |
| Maxillary Nerve              | 4      | 2.98018  | 2.99048           | 0.01030           | 243     | 218          | 105.17            | 119.93            |
| Ophthalmic Nerve             | 5      | 2.97212  | 2.97545           | 0.00333           | 110     | 85           | 126.84            | 144.64            |
| Mandibular Nerve             | 6      | 2.98863  | 2.99168           | 0.00305           | 165     | 140          | 228.10            | 260.10            |
| Upper Cervical Spinal Cord   | 7      | 2.98482  | 3.03964           | 0.05482           | 129     | 104          | 9.43              | 10.75             |
| Olfactory Bulbs              | 8      | 3.07646  | 3.16515           | 0.08869           | 334     | 309          | 17.31             | 19.74             |
| Anterior Olfactory Nucleus   | 9      | 2.97896  | 3.02255           | 0.04359           | 86      | 61           | 6.95              | 7.93              |
| Frontal Cortex               | 10     | 2.98105  | 3.01403           | 0.03298           | 121     | 96           | 14.46             | 16.49             |
| Caudate/Putamen              | 11     | 2.97835  | 2.98967           | 0.01132           | 45      | 20           | 8.78              | 10.01             |
| Septal Nucleus               | 12     | 2.99692  | 3.00959           | 0.01267           | 46      | 21           | 8.24              | 9.39              |
| Parietal Cortex              | 13     | 2.99975  | 3.03391           | 0.03416           | 86      | 61           | 8.87              | 10.12             |
| Hippocampus                  | 14     | 3.01623  | 3.05827           | 0.04204           | 72      | 47           | 5.56              | 6.33              |
| Thalamus                     | 15     | 2.99915  | 3.07795           | 0.07880           | 99      | 74           | 4.67              | 5.32              |
| Hypothalamus                 | 16     | 3.07121  | 3.09728           | 0.02607           | 63      | 38           | 7.24              | 8.26              |
| Midbrain                     | 17     | 2.99421  | 3.10618           | 0.11197           | 149     | 124          | 5.50              | 6.28              |
| Pons                         | 18     | 3.00996  | 3.07623           | 0.06627           | 100     | 75           | 5.62              | 6.41              |
| Medulla                      | 19     | 2.97997  | 3.07386           | 0.09389           | 134     | 109          | 5.77              | 6.58              |
| Cerebellum                   | 20     | 3.00134  | 3.25988           | 0.25854           | 248     | 223          | 4.29              | 4.89              |
| Superficial Nodes (2)        | 21     | 3.01231  | 3.06706           | 0.05475           | 2075    | 2050         | 186.06            | 212.17            |
| Cervical Nodes (2)           | 22     | 2.99163  | 3.00298           | 0.01135           | 293     | 268          | 117.34            | 133.80            |
| Thyroid                      | 23     | 2.99353  | 3.01369           | 0.02016           | 1676    | 1651         | 406.96            | 464.05            |
| Olfactory Epithelium         | 24     | 2.97788  | 3.07688           | 0.09900           | 43968   | 43943        | 2,205.71          | 2,515.13          |
| Respiratory Epithelium       | 25     | 3.00157  | 3.05946           | 0.05789           | 9325395 | 9325370      | 800,489.43        | 912,784.62        |
| Axillary Nodes (2)           | 26     | 2.98852  | 3.02046           | 0.03194           | 102     | 77           | 11.98             | 13.66             |
| Muscle (R, deltoid)          | 27     | 2.99654  | 3.05106           | 0.05452           | 121     | 96           | 8.75              | 9.98              |
| Liver (R, superficial lobe)  | 28     | 2.99119  | 3.02283           | 0.03164           | 100     | 75           | 11.78             | 13.43             |
| Kidney (L, tip)              | 29     | 3.03154  | 3.07394           | 0.04240           | 284     | 259          | 30.35             | 34.61             |
| Lung (R, top lobe)           | 30     | 2.95729  | 2.98817           | 0.03088           | 129     | 104          | 16.74             | 19.08             |
| Trachea (near cut-off)       | 31     | 2.97605  | 2.99156           | 0.01551           | 123     | 98           | 31.40             | 35.80             |
| Esophagus (near cut-off)     | 32     | 3.00235  | 3.01762           | 0.01527           | 111     | 86           | 27.99             | 31.91             |
| Spleen (tip)                 | 33     | 2.97355  | 3.01624           | 0.04269           | 209     | 184          | 21.42             | 24.42             |
| Heart                        | 34     | 2.96965  | 3.03421           | 0.06456           | 178     | 153          | 11.78             | 13.43             |
| Urine (fill to line of tube) | 35     | 2.96195  | 3.14306           | 0.18111           | 3985    | 3960         | 108.65            | 123.90            |
| Spinal Dura                  | 36     | 2.97878  | 2.99926           | 0.02048           | 61      | 36           | 8.74              | 9.96              |
| Lower Cervical Spinal Cord   | 37     | 2.96198  | 3.09963           | 0.13765           | 142     | 117          | 4.22              | 4.82              |
| Thoracic Spinal Cord         | 38     | 2.97727  | 3.05259           | 0.07532           | 77      | 52           | 3.43              | 3.91              |
| Lumbar Spinal Cord           | 39     | 2.95405  | 3.06849           | 0.11444           | 93      | 68           | 2.95              | 3.37              |
| Blood Sample                 | 40     | 2.96856  | 3.24460           | 0.27604           | 3575    | 3550         | 63.91             | 72.87             |
| Drug Standard                | 41     | 2.97326  | 2.97623           | 0.00297           | 4436891 | 4436866      | 7,423,572.26      | 8,464,974.49      |
| Drug Standard                | 42     | 2.98708  | 2.98967           | 0.00259           | 4471207 | 4471182      | 8,578,585.05      | 9,782,016.13      |
| Drug Standard                | 43     | 3.00737  | 3.01003           | 0.00266           | 4182632 | 4182607      | 7,813,731.80      | 8,909,866.85      |
|                              |        |          |                   |                   |         |              | 0.201<br>cpm/fmol | 0.176<br>cpm/fmol |

| Auto Calculations                                        | Enter Values                        |
|----------------------------------------------------------|-------------------------------------|
| Total uL of Dose Sol = 62.2                              | Oxytocin Molecular Weight = 1,007   |
| Hot mg = 0.0000                                          | Date of Synthesis = 10/23/07        |
| Cold mg = 0.5162                                         | Hot uCi/uL at Synthesis = 2.320     |
| Total mg in Dose Sol = 0.5162                            | Hot uCi/ug at Synthesis = 1985.72   |
| Conc Of Dose Sol (ug/uL) = 8.3011                        | Cold ug/uL = 15.00                  |
| Days after Synthesis Delivered = 9                       | Desired uCi = 45.0                  |
| Decay on Day Delivered = 0.9013                          | Desired mg = 0.400                  |
| Total uCi in Dose Sol on Day Delivered = 58.07           | Estimated Desired nmol = 397.1      |
| uCi/uL in Dose Sol on Day Delivered = 0.9339             | <b>Date of Delivery = 11/01/07</b>  |
| mg delivered = 0.400                                     | <b>uL delivered (actual) = 48.2</b> |
| uCi delivered = 45.00                                    | <b>Date of Counting = 11/01/07</b>  |
| Estimated nmol delivered = 397.17                        | <b>Dose Calculator</b>              |
| Days after Synthesis Counted = 9                         | uL Hot to Deliver = 21.52           |
| Decay on Day Counted = 0.9013                            | uL Cold to Deliver = 26.66          |
| Specific Activity from Amersham Specs (cpm/fmol) = 0.201 | Total uL to Deliver = 48.19         |
| Avg. Volume of Standard (uL)* = 3.0                      | Hot to Cold Ratio = 0.81            |
| Avg. CPM-bkgd of Standard = 4,363,552                    | Total uL to Make = 62.19            |
| Specific Activity from Standards: (CPM/fmol) = 0.176     | Dose Solution uL Hot = 27.77        |
| Date of Disposal from Decay Storage = 06/14/09           | Dose Solution uL Cold = 34.41       |

**Table A19: Intranasal Oxytocin Rat 19 Data**

| Oxytocin Rat 19   | Route | Com-pound | Volume (uL) | uCi   | mg    | Time (min) | Perfused @ (min) |  |
|-------------------|-------|-----------|-------------|-------|-------|------------|------------------|--|
| Amount Delivered: | IN    | Oxytocin  | 48          | 45.00 | 0.400 | 14:07      | 30:50            |  |

  

| Tissue Description           | Tube # | Tube (g) | Tissue + Tube (g) | Tissue Weight (g) | CPM      | CPM -25 bkgd | nM (Spec. Act.)   | nM (Stan.)        |
|------------------------------|--------|----------|-------------------|-------------------|----------|--------------|-------------------|-------------------|
| Dorsal Dura                  | 1      | 2.99361  | 3.01062           | 0.01701           | 540      | 515          | 150.45            | 172.03            |
| Ventral Dura                 | 2      | 2.99865  | 3.00646           | 0.00781           | 113      | 88           | 55.99             | 64.02             |
| Trigeminal Ganglion          | 3      | 2.98639  | 3.01947           | 0.03308           | 2174     | 2149         | 322.82            | 369.12            |
| Maxillary Nerve              | 4      | 2.99531  | 3.00791           | 0.01260           | 443      | 418          | 164.85            | 188.50            |
| Ophthalmic Nerve             | 5      | 2.99885  | 3.00221           | 0.00336           | 387      | 362          | 535.38            | 612.16            |
| Mandibular Nerve             | 6      | 2.99532  | 2.99899           | 0.00367           | 304      | 279          | 377.77            | 431.95            |
| Upper Cervical Spinal Co     | 7      | 2.99588  | 3.05298           | 0.05710           | 286      | 261          | 22.71             | 25.97             |
| Olfactory Bulbs              | 8      | 3.00439  | 3.08256           | 0.07817           | 284      | 259          | 16.46             | 18.83             |
| Anterior Olfactory Nucleu    | 9      | 3.02215  | 3.06696           | 0.04481           | 175      | 150          | 16.63             | 19.02             |
| Frontal Cortex               | 10     | 3.02792  | 3.07082           | 0.04290           | 99       | 74           | 8.57              | 9.80              |
| Caudate/Putamen              | 11     | 3.05204  | 3.06257           | 0.01053           | 50       | 25           | 11.80             | 13.49             |
| Septal Nucleus               | 12     | 3.07949  | 3.09121           | 0.01172           | 38       | 13           | 5.51              | 6.30              |
| Parietal Cortex              | 13     | 3.01679  | 3.05465           | 0.03786           | 111      | 86           | 11.29             | 12.91             |
| Hippocampus                  | 14     | 3.01884  | 3.05890           | 0.04006           | 122      | 97           | 12.03             | 13.76             |
| Thalamus                     | 15     | 2.97848  | 3.06799           | 0.08951           | 235      | 210          | 11.66             | 13.33             |
| Hypothalamus                 | 16     | 3.00731  | 3.03391           | 0.02660           | 111      | 86           | 16.07             | 18.37             |
| Midbrain                     | 17     | 3.00089  | 3.11360           | 0.11271           | 260      | 235          | 10.36             | 11.85             |
| Pons                         | 18     | 3.03093  | 3.10186           | 0.07093           | 206      | 181          | 12.68             | 14.50             |
| Medulla                      | 19     | 2.97522  | 3.08010           | 0.10488           | 297      | 272          | 12.89             | 14.74             |
| Cerebellum                   | 20     | 2.99537  | 3.24967           | 0.25430           | 386      | 361          | 7.05              | 8.07              |
| Superficial Nodes (2)        | 21     | 3.00760  | 3.07827           | 0.07067           | 3345     | 3320         | 233.45            | 266.93            |
| Cervical Nodes (2)           | 22     | 3.00706  | 3.02246           | 0.01540           | 339      | 314          | 101.32            | 115.85            |
| Thyroid                      | 23     | 3.01469  | 3.04404           | 0.02935           | 1850     | 1825         | 308.99            | 353.31            |
| Olfactory Epithelium         | 24     | 2.97543  | 3.07835           | 0.10292           | 34856    | 34831        | 1,681.74          | 1,922.93          |
| Respiratory Epithelium       | 25     | 3.00291  | 3.07923           | 0.07632           | 10224488 | 10224463     | 665,725.55        | 761,200.43        |
| Axillary Nodes (2)           | 26     | 2.99475  | 3.01970           | 0.02495           | 169      | 144          | 28.68             | 32.79             |
| Muscle (R, deltoid)          | 27     | 2.98186  | 3.02188           | 0.04002           | 172      | 147          | 18.25             | 20.87             |
| Liver (R, superficial lobe)  | 28     | 3.06172  | 3.10324           | 0.04152           | 107      | 82           | 9.81              | 11.22             |
| Kidney (L, tip)              | 29     | 3.00057  | 3.04849           | 0.04792           | 483      | 458          | 47.49             | 54.31             |
| Lung (R, top lobe)           | 30     | 2.98637  | 3.02226           | 0.03589           | 218      | 193          | 26.72             | 30.55             |
| Trachea (near cut-off)       | 31     | 2.97688  | 2.98920           | 0.01232           | 82       | 57           | 22.99             | 26.29             |
| Esophagus (near cut-off)     | 32     | 2.98304  | 2.99251           | 0.00947           | 66       | 41           | 21.51             | 24.60             |
| Spleen (tip)                 | 33     | 2.97059  | 3.01607           | 0.04548           | 144      | 119          | 13.00             | 14.87             |
| Heart                        | 34     | 2.95880  | 3.02087           | 0.06207           | 167      | 142          | 11.37             | 13.00             |
| Urine (fill to line of tube) | 35     | 2.98236  | 3.30984           | 0.32748           | 3312     | 3287         | 49.88             | 57.03             |
| Spinal Dura                  | 36     | 2.95454  | 2.96986           | 0.01532           | 21972    | 21947        | 7,118.84          | 8,139.79          |
| Lower Cervical Spinal Co     | 37     | 2.98492  | 3.07584           | 0.09092           | 129      | 104          | 5.68              | 6.50              |
| Thoracic Spinal Cord         | 38     | 2.97064  | 3.11342           | 0.14278           | 4505     | 4480         | 155.92            | 178.28            |
| Lumbar Spinal Cord           | 39     | 3.03170  | 3.18001           | 0.14831           | 262      | 237          | 7.94              | 9.08              |
| Blood Sample                 | 40     | 2.99711  | 3.21934           | 0.22223           | 2614     | 2589         | 57.89             | 66.20             |
| Drug Standard                | 41     | 2.97326  | 2.97623           | 0.00297           | 4435788  | 4435763      | 7,421,726.77      | 8,486,112.07      |
| Drug Standard                | 42     | 2.98708  | 2.98967           | 0.00259           | 4452756  | 4452731      | 8,543,184.24      | 9,768,403.12      |
| Drug Standard                | 43     | 3.00737  | 3.01003           | 0.00266           | 4166333  | 4166308      | 7,783,282.85      | 8,899,520.64      |
|                              |        |          |                   |                   |          |              | 0.201<br>cpm/fmol | 0.176<br>cpm/fmol |

| Auto Calculations                                        | Enter Values                        |
|----------------------------------------------------------|-------------------------------------|
| Total uL of Dose Sol = 62.2                              | Oxytocin Molecular Weight = 1,007   |
| Hot mg = 0.0000                                          | Date of Synthesis = 10/23/07        |
| Cold mg = 0.5162                                         | Hot uCi/uL at Synthesis = 2.320     |
| Total mg in Dose Sol = 0.5162                            | Hot uCi/ug at Synthesis = 1985.72   |
| Conc Of Dose Sol (ug/uL) = 8.3011                        | Cold ug/uL = 15.00                  |
| Days after Synthesis Delivered = 9                       | Desired uCi = 45.0                  |
| Decay on Day Delivered = 0.9013                          | Desired mg = 0.400                  |
| Total uCi in Dose Sol on Day Delivered = 58.07           | Estimated Desired nmol = 397.1      |
| uCi/uL in Dose Sol on Day Delivered = 0.9339             | <b>Date of Delivery = 11/01/07</b>  |
| mg delivered = 0.400                                     | <b>uL delivered (actual) = 48.2</b> |
| uCi delivered = 45.00                                    | <b>Date of Counting = 11/01/07</b>  |
| Estimated nmol delivered = 397.17                        | <b>Dose Calculator</b>              |
| Days after Synthesis Counted = 9                         | uL Hot to Deliver = 21.52           |
| Decay on Day Counted = 0.9013                            | uL Cold to Deliver = 26.66          |
| Specific Activity from Amersham Specs (cpm/fmol) = 0.201 | Total uL to Deliver = 48.19         |
| Avg. Volume of Standard (uL)* = 3.0                      | Hot to Cold Ratio = 0.81            |
| Avg. CPM-bkgd of Standard = 4,351,601                    | Total uL to Make = 62.19            |
| Specific Activity from Standards: (CPM/fmol) = 0.176     | Dose Solution uL Hot = 27.77        |
| Date of Disposal from Decay Storage = 06/14/09           | Dose Solution uL Cold = 34.41       |

**Table A20: Intranasal Oxytocin Rat 40 Data**

| Oxytocin Rat 40   | Route | Com-pound | Volume (uL) | uCi   | mg    | Time (min) | Perfused @ (min) |
|-------------------|-------|-----------|-------------|-------|-------|------------|------------------|
| Amount Delivered: | IN    | Oxytocin  | 50          | 45.00 | 0.400 | 14:00      | 30:44            |

| Tissue Description           | Tube # | Tube (g) | Tissue + Tube (g) | Tissue Weight (g) | CPM     | CPM -25 bkgd | nM (Spec. Act.)   | nM (Stan.)        |
|------------------------------|--------|----------|-------------------|-------------------|---------|--------------|-------------------|-------------------|
| Dorsal Dura                  | 1      | 3.01569  | 3.02459           | 0.00890           | 239     | 214          | 119.49            | 154.10            |
| Ventral Dura                 | 2      | 2.99976  | 3.01121           | 0.01145           | 370     | 345          | 149.73            | 193.10            |
| Trigeminal Ganglion          | 3      | 3.02003  | 3.04599           | 0.02596           | 1355    | 1330         | 254.59            | 328.34            |
| Maxillary Nerve              | 4      | 3.00325  | 3.01354           | 0.01029           | 469     | 444          | 214.42            | 276.53            |
| Ophthalmic Nerve             | 5      | 2.98240  | 2.98697           | 0.00457           | 406     | 381          | 414.29            | 534.30            |
| Mandibular Nerve             | 6      | 2.99682  | 3.00218           | 0.00536           | 396     | 371          | 343.96            | 443.59            |
| Upper Cervical Spinal Cord   | 7      | 2.99992  | 3.05661           | 0.05669           | 256     | 231          | 20.25             | 26.11             |
| Olfactory Bulbs              | 8      | 2.98390  | 3.03931           | 0.05541           | 2445    | 2420         | 217.03            | 279.90            |
| Anterior Olfactory Nucleus   | 9      | 3.00632  | 3.03645           | 0.03013           | 95      | 70           | 11.54             | 14.89             |
| Frontal Cortex               | 10     | 3.01982  | 3.05150           | 0.03168           | 92      | 67           | 10.51             | 13.55             |
| Caudate/Putamen              | 11     | 3.00384  | 3.01660           | 0.01276           | 132     | 107          | 41.67             | 53.74             |
| Septal Nucleus               | 12     | 3.00270  | 3.01414           | 0.01144           | 126     | 101          | 43.87             | 56.58             |
| Parietal Cortex              | 13     | 3.01860  | 3.04934           | 0.03074           | 106     | 81           | 13.09             | 16.89             |
| Hippocampus                  | 14     | 2.99712  | 3.03032           | 0.03320           | 113     | 88           | 13.17             | 16.99             |
| Thalamus                     | 15     | 2.98416  | 3.06157           | 0.07741           | 167     | 142          | 9.12              | 11.76             |
| Hypothalamus                 | 16     | 2.99061  | 3.01591           | 0.02530           | 335     | 310          | 60.89             | 78.53             |
| Midbrain                     | 17     | 2.98396  | 3.09304           | 0.10908           | 529     | 504          | 22.96             | 29.61             |
| Pons                         | 18     | 3.01817  | 3.08965           | 0.07148           | 319     | 294          | 20.44             | 26.36             |
| Medulla                      | 19     | 2.99390  | 3.08689           | 0.09299           | 270     | 245          | 13.09             | 16.89             |
| Cerebellum                   | 20     | 3.01456  | 3.25957           | 0.24501           | 419     | 394          | 7.99              | 10.31             |
| Superficial Nodes (2)        | 21     | 3.02781  | 3.10161           | 0.07380           | 2409    | 2384         | 160.53            | 207.03            |
| Cervical Nodes (2)           | 22     | 2.97610  | 2.98942           | 0.01332           | 208     | 183          | 68.27             | 88.05             |
| Thyroid                      | 23     | 2.98509  | 3.01299           | 0.02790           | 1235    | 1210         | 215.51            | 277.94            |
| Olfactory Epithelium         | 24     | 3.00488  | 3.11420           | 0.10932           | 1131165 | 1131140      | 51,417.36         | 66,311.65         |
| Respiratory Epithelium       | 25     | 2.98318  | 3.03416           | 0.05098           | 1235438 | 1235413      | 120,421.88        | 155,304.99        |
| Axillary Nodes (2)           | 26     | 2.97497  | 3.02501           | 0.05004           | 164     | 139          | 13.80             | 17.80             |
| Muscle (R, deltoid)          | 27     | 2.98503  | 3.03066           | 0.04563           | 136     | 111          | 12.09             | 15.59             |
| Liver (R, superficial lobe)  | 28     | 2.97755  | 3.03410           | 0.05655           | 82      | 57           | 5.01              | 6.46              |
| Kidney (L, tip)              | 29     | 2.98206  | 3.04910           | 0.06704           | 366     | 341          | 25.28             | 32.60             |
| Lung (R, top lobe)           | 30     | 2.96318  | 3.00143           | 0.03825           | 94      | 69           | 8.96              | 11.56             |
| Trachea (near cut-off)       | 31     | 3.05858  | 3.07972           | 0.02114           | 55      | 30           | 7.05              | 9.09              |
| Esophagus (near cut-off)     | 32     | 2.96189  | 2.97910           | 0.01721           | 120     | 95           | 27.43             | 35.38             |
| Spleen (tip)                 | 33     | 2.97236  | 3.02197           | 0.04961           | 233     | 208          | 20.83             | 26.87             |
| Heart                        | 34     | 2.98193  | 3.02053           | 0.03860           | 80      | 55           | 7.08              | 9.13              |
| Urine (fill to line of tube) | 35     | 2.98238  | 3.15426           | 0.17188           | 980     | 955          | 27.61             | 35.61             |
| Spinal Dura                  | 36     | 2.97274  | 2.99373           | 0.02099           | 586     | 561          | 132.81            | 171.29            |
| Lower Cervical Spinal Cord   | 37     | 2.97158  | 3.09628           | 0.12470           | 73      | 48           | 1.91              | 2.47              |
| Thoracic Spinal Cord         | 38     | 2.98810  | 3.06622           | 0.07812           | 121     | 96           | 6.11              | 7.88              |
| Lumbar Spinal Cord           | 39     | 2.97419  | 3.09363           | 0.11944           | 134     | 109          | 4.53              | 5.85              |
| Blood Sample                 | 40     | 3.03828  | 3.28933           | 0.25105           | 1801    | 1776         | 35.15             | 45.34             |
| Drug Standard                | 41     | 2.96002  | 2.96314           | 0.00312           | 3623537 | 3623512      | 5,771,227.40      | 7,443,002.87      |
| Drug Standard                | 42     | 3.01139  | 3.01488           | 0.00349           | 3906139 | 3906114      | 5,561,764.10      | 7,172,863.46      |
| Drug Standard                | 43     | 2.96107  | 2.96344           | 0.00237           | 3625186 | 3625161      | 7,601,022.71      | 9,802,842.61      |
|                              |        |          |                   |                   |         |              | 0.201<br>cpm/fmol | 0.156<br>cpm/fmol |

| Auto Calculations                                        | Enter Values                        |
|----------------------------------------------------------|-------------------------------------|
| Total uL of Dose Sol = 64.0                              | Oxytocin Molecular Weight = 1,007   |
| Hot mg = 0.0000                                          | Date of Synthesis = 11/13/07        |
| Cold mg = 0.5120                                         | Hot uCi/uL at Synthesis = 2.320     |
| Total mg in Dose Sol = 0.5120                            | Hot uCi/ug at Synthesis = 1985.72   |
| Conc Of Dose Sol (ug/uL) = 8.0002                        | Cold ug/uL = 15.00                  |
| Days after Synthesis Delivered = 16                      | Desired uCi = 45.0                  |
| Decay on Day Delivered = 0.8313                          | Desired mg = 0.400                  |
| Total uCi in Dose Sol on Day Delivered = 57.60           | Estimated Desired nmol = 397.1      |
| uCi/uL in Dose Sol on Day Delivered = 0.9000             | <b>Date of Delivery = 11/29/07</b>  |
| mg delivered = 0.400                                     | <b>uL delivered (actual) = 50.0</b> |
| uCi delivered = 45.00                                    | <b>Date of Counting = 11/29/07</b>  |
| Estimated nmol delivered = 397.16                        | <b>Dose Calculator</b>              |
| Days after Synthesis Counted = 16                        | uL Hot to Deliver = 23.33           |
| Decay on Day Counted = 0.8313                            | uL Cold to Deliver = 26.66          |
| Specific Activity from Amersham Specs (cpm/fmol) = 0.201 | Total uL to Deliver = 50.00         |
| Avg. Volume of Standard (uL)* = 3.0                      | Hot to Cold Ratio = 0.88            |
| Avg. CPM-bkgd of Standard = 3,718,262                    | Total uL to Make = 64.00            |
| Specific Activity from Standards: (CPM/fmol) = 0.156     | Dose Solution uL Hot = 29.87        |
| Date of Disposal from Decay Storage = 07/05/09           | Dose Solution uL Cold = 34.13       |

**Table A21: Intranasal Oxytocin Rat 41 Data**

| Oxytocin Rat 41   | Route | Com-pound | Volume (uL) | uCi   | mg    | Time (min) | Perfused @ (min) |
|-------------------|-------|-----------|-------------|-------|-------|------------|------------------|
| Amount Delivered: | IN    | Oxytocin  | 50          | 45.00 | 0.400 | 14:00      | 30:50            |

| Tissue Description           | Tube # | Tube (g) | Tissue + Tube (g) | Tissue Weight (g) | CPM     | CPM -25 bkgd | nM (Spec. Act.)   | nM (Stan.)        |
|------------------------------|--------|----------|-------------------|-------------------|---------|--------------|-------------------|-------------------|
| Dorsal Dura                  | 1      | 2.99793  | 3.00791           | 0.00998           | 2823    | 2798         | 1,393.19          | 2,221.55          |
| Ventral Dura                 | 2      | 3.00028  | 3.01886           | 0.01858           | 26934   | 26909        | 7,196.89          | 11,475.98         |
| Trigeminal Ganglion          | 3      | 2.97027  | 2.99758           | 0.02731           | 1322    | 1297         | 236.00            | 376.32            |
| Maxillary Nerve              | 4      | 3.01236  | 3.02424           | 0.01188           | 796     | 771          | 322.50            | 514.25            |
| Ophthalmic Nerve             | 5      | 2.99639  | 3.00033           | 0.00394           | 277     | 252          | 317.83            | 506.81            |
| Mandibular Nerve             | 6      | 2.97725  | 2.98120           | 0.00395           | 384     | 359          | 451.64            | 720.17            |
| Upper Cervical Spinal Cord   | 7      | 3.08289  | 3.13502           | 0.05213           | 729     | 704          | 67.11             | 107.01            |
| Olfactory Bulbs              | 8      | 2.98481  | 3.04740           | 0.06259           | 1384    | 1359         | 107.90            | 172.05            |
| Anterior Olfactory Nucleus   | 9      | 2.96897  | 2.99499           | 0.02602           | 280     | 255          | 48.70             | 77.66             |
| Frontal Cortex               | 10     | 2.99417  | 3.03297           | 0.03880           | 728     | 703          | 90.04             | 143.57            |
| Caudate/Putamen              | 11     | 2.97864  | 2.99151           | 0.01287           | 162     | 137          | 52.90             | 84.35             |
| Septal Nucleus               | 12     | 2.98499  | 2.99587           | 0.01088           | 242     | 217          | 99.11             | 158.04            |
| Parietal Cortex              | 13     | 2.99564  | 3.03453           | 0.03889           | 408     | 383          | 48.94             | 78.04             |
| Hippocampus                  | 14     | 3.02072  | 3.05762           | 0.03690           | 319     | 294          | 39.59             | 63.13             |
| Thalamus                     | 15     | 3.00605  | 3.07811           | 0.07206           | 540     | 515          | 35.51             | 56.63             |
| Hypothalamus                 | 16     | 2.98890  | 3.01430           | 0.02540           | 425     | 400          | 78.26             | 124.79            |
| Midbrain                     | 17     | 3.00777  | 3.11253           | 0.10476           | 1256    | 1231         | 58.39             | 93.11             |
| Pons                         | 18     | 2.97528  | 3.06478           | 0.08950           | 1098    | 1073         | 59.58             | 95.00             |
| Medulla                      | 19     | 3.00766  | 3.12520           | 0.11754           | 1469    | 1444         | 61.05             | 97.35             |
| Cerebellum                   | 20     | 3.00652  | 3.25067           | 0.24415           | 2924    | 2899         | 59.00             | 94.09             |
| Superficial Nodes (2)        | 21     | 2.98374  | 3.04937           | 0.06563           | 7673    | 7648         | 579.08            | 923.39            |
| Cervical Nodes (2)           | 22     | 2.99884  | 3.01278           | 0.01394           | 805     | 780          | 278.05            | 443.37            |
| Thyroid                      | 23     | 3.00782  | 3.02979           | 0.02197           | 67540   | 67515        | 15,270.85         | 24,350.52         |
| Olfactory Epithelium         | 24     | 3.01216  | 3.10629           | 0.09413           | 44327   | 44302        | 2,338.77          | 3,729.35          |
| Respiratory Epithelium       | 25     | 3.00669  | 3.05216           | 0.04547           | 3256358 | 3256333      | 355,874.55        | 567,468.74        |
| Axillary Nodes (2)           | 26     | 2.97564  | 3.02346           | 0.04782           | 1556    | 1531         | 159.10            | 253.69            |
| Muscle (R, deltoid)          | 27     | 2.98940  | 3.04580           | 0.05640           | 785     | 760          | 66.96             | 106.78            |
| Liver (R, superficial lobe)  | 28     | 2.98693  | 3.04058           | 0.05365           | 1704    | 1679         | 155.52            | 247.98            |
| Kidney (L, tip)              | 29     | 2.99113  | 3.04624           | 0.05511           | 3857    | 3832         | 345.53            | 550.98            |
| Lung (R, top lobe)           | 30     | 2.97340  | 3.02115           | 0.04775           | 4523    | 4498         | 468.10            | 746.42            |
| Trachea (near cut-off)       | 31     | 2.96315  | 2.98596           | 0.02281           | 1418    | 1393         | 303.47            | 483.91            |
| Esophagus (near cut-off)     | 32     | 2.97331  | 2.99214           | 0.01883           | 754     | 729          | 192.38            | 306.77            |
| Spleen (tip)                 | 33     | 2.98950  | 3.07521           | 0.08571           | 7705    | 7680         | 445.27            | 710.02            |
| Heart                        | 34     | 2.99757  | 3.04373           | 0.04616           | 776     | 751          | 80.85             | 128.92            |
| Urine (fill to line of tube) | 35     | 2.96069  | 3.18749           | 0.22680           | 27013   | 26988        | 591.32            | 942.90            |
| Spinal Dura                  | 36     | 2.98208  | 2.99997           | 0.01789           | 278     | 253          | 70.28             | 112.06            |
| Lower Cervical Spinal Cord   | 37     | 2.97371  | 3.07232           | 0.09861           | 781     | 756          | 38.10             | 60.75             |
| Thoracic Spinal Cord         | 38     | 2.98704  | 3.07119           | 0.08415           | 748     | 723          | 42.70             | 68.08             |
| Lumbar Spinal Cord           | 39     | 2.98552  | 3.10660           | 0.12108           | 1560    | 1535         | 63.00             | 100.46            |
| Blood Sample                 | 40     | 2.99286  | 3.23351           | 0.24065           | 44598   | 44573        | 920.41            | 1,467.66          |
| Drug Standard                | 41     | 3.06179  | 3.06449           | 0.00270           | 2940894 | 2940869      | 5,412,588.28      | 8,630,779.03      |
| Drug Standard                | 42     | 2.97336  | 2.97594           | 0.00258           | 3081681 | 3081656      | 5,935,503.00      | 9,464,605.88      |
| Drug Standard                | 43     | 2.96895  | 2.97199           | 0.00304           | 2999364 | 2999339      | 4,902,809.83      | 7,817,898.97      |
|                              |        |          |                   |                   |         |              | 0.201<br>cpm/fmol | 0.126<br>cpm/fmol |

| Auto Calculations                                        | Enter Values                        |
|----------------------------------------------------------|-------------------------------------|
| Total uL of Dose Sol = 64.0                              | Oxytocin Molecular Weight = 1,007   |
| Hot mg = 0.0000                                          | Date of Synthesis = 11/13/07        |
| Cold mg = 0.5120                                         | Hot uCi/uL at Synthesis = 2.320     |
| Total mg in Dose Sol = 0.5120                            | Hot uCi/ug at Synthesis = 1985.72   |
| Conc Of Dose Sol (ug/uL) = 8.0002                        | Cold ug/uL = 15.00                  |
| Days after Synthesis Delivered = 16                      | Desired uCi = 45.0                  |
| Decay on Day Delivered = 0.8313                          | Desired mg = 0.400                  |
| Total uCi in Dose Sol on Day Delivered = 57.60           | Estimated Desired nMol = 397.1      |
| uCi/uL in Dose Sol on Day Delivered = 0.9000             | <b>Date of Delivery = 11/29/07</b>  |
| mg delivered = 0.400                                     | <b>uL delivered (actual) = 50.0</b> |
| uCi delivered = 45.00                                    | <b>Date of Counting = 11/29/07</b>  |
| Estimated nMol delivered = 397.16                        | <b>Dose Calculator</b>              |
| Days after Synthesis Counted = 16                        | uL Hot to Deliver = 23.33           |
| Decay on Day Counted = 0.8313                            | uL Cold to Deliver = 26.66          |
| Specific Activity from Amersham Specs (cpm/fmol) = 0.201 | Total uL to Deliver = 50.00         |
| Avg. Volume of Standard (uL)* = 3.0                      | Hot to Cold Ratio = 0.88            |
| Avg. CPM-bkgd of Standard = 3,007,288                    | Total uL to Make = 64.00            |
| Specific Activity from Standards: (CPM/fmol) = 0.126     | Dose Solution uL Hot = 29.87        |
| Date of Disposal from Decay Storage = 07/05/09           | Dose Solution uL Cold = 34.13       |

## **Appendix B – Intranasal Oxytocin with 1% Avicel ® Mucoadhesive Data**

### **Tables**

Table B01: Intranasal Oxytocin with Mucoadhesive, Rat 20 Data

Table B02: Intranasal Oxytocin with Mucoadhesive, Rat 21 Data

Table B03: Intranasal Oxytocin with Mucoadhesive, Rat 22 Data

Table B04: Intranasal Oxytocin with Mucoadhesive, Rat 23 Data

Table B05: Intranasal Oxytocin with Mucoadhesive, Rat 24 Data

Table B06: Intranasal Oxytocin with Mucoadhesive, Rat 25 Data

Table B07: Intranasal Oxytocin with Mucoadhesive, Rat 26 Data

Table B08: Intranasal Oxytocin with Mucoadhesive, Rat 27 Data

Table B09: Intranasal Oxytocin with Mucoadhesive, Rat 28 Data

Table B10: Intranasal Oxytocin with Mucoadhesive, Rat 29 Data

Table B11: Intranasal Oxytocin with Mucoadhesive, Rat 32 Data

Table B12: Intranasal Oxytocin with Mucoadhesive, Rat 33 Data

Table B13: Intranasal Oxytocin with Mucoadhesive, Rat 34 Data

Table B14: Intranasal Oxytocin with Mucoadhesive, Rat 35 Data

Table B15: Intranasal Oxytocin with Mucoadhesive, Rat 36 Data

Table B16: Intranasal Oxytocin with Mucoadhesive, Rat 37 Data

Table B17: Intranasal Oxytocin with Mucoadhesive, Rat 38 Data

Table B18: Intranasal Oxytocin with Mucoadhesive, Rat 39 Data



**Table B01: Intranasal Oxytocin with 1% Mucoadhesive Rat 20 Data**

| Oxytocin Rat 20<br>1% Mucoadhesive | Route | Com-pound | Volume<br>(uL) | uCi   | mg    | Time (min) | Perfused @ (min) |
|------------------------------------|-------|-----------|----------------|-------|-------|------------|------------------|
| Amount Delivered:                  | IN    | Oxytocin  | 49             | 45.00 | 0.400 | 14:00      | 30:48            |

| Tissue Description           | Tube # | Tube (g) | Tissue +<br>Tube (g) | Tissue<br>Weight (g) | CPM     | CPM -25<br>bkgd | nM<br>(Spec. Act.) | nM (Stan.)        |
|------------------------------|--------|----------|----------------------|----------------------|---------|-----------------|--------------------|-------------------|
| Dorsal Dura                  | 1      | 3.05599  | 3.06355              | 0.00756              | 5616    | 5591            | 3,675.03           | 4,137.14          |
| Ventral Dura                 | 2      | 2.97742  | 2.98622              | 0.00880              | 328     | 303             | 171.10             | 192.62            |
| Trigeminal Ganglion          | 3      | 3.00585  | 3.03293              | 0.02708              | 1070    | 1045            | 191.76             | 215.87            |
| Maxillary Nerve              | 4      | 3.00276  | 3.01157              | 0.00881              | 900     | 875             | 493.54             | 555.60            |
| Ophthalmic Nerve             | 5      | 3.00798  | 3.01276              | 0.00478              | 3963    | 3938            | 4,093.93           | 4,608.72          |
| Mandibular Nerve             | 6      | 2.99959  | 3.00252              | 0.00293              | 272     | 247             | 418.91             | 471.59            |
| Upper Cervical Spinal Cord   | 7      | 2.99860  | 3.06902              | 0.07042              | 479     | 454             | 32.04              | 36.07             |
| Olfactory Bulbs              | 8      | 3.00029  | 3.07876              | 0.07847              | 799     | 774             | 49.02              | 55.18             |
| Anterior Olfactory Nucleus   | 9      | 3.00893  | 3.05280              | 0.04387              | 189     | 164             | 18.58              | 20.91             |
| Frontal Cortex               | 10     | 2.99241  | 3.02838              | 0.03597              | 145     | 120             | 16.58              | 18.66             |
| Caudate/Putamen              | 11     | 2.98903  | 3.00128              | 0.01225              | 58      | 33              | 13.39              | 15.07             |
| Septal Nucleus               | 12     | 2.98866  | 3.00743              | 0.01877              | 96      | 71              | 18.80              | 21.16             |
| Parietal Cortex              | 13     | 3.00482  | 3.03872              | 0.03390              | 90      | 65              | 9.53               | 10.73             |
| Hippocampus                  | 14     | 3.01160  | 3.04908              | 0.03748              | 85      | 60              | 7.96               | 8.96              |
| Thalamus                     | 15     | 2.99986  | 3.07715              | 0.07729              | 174     | 149             | 9.58               | 10.78             |
| Hypothalamus                 | 16     | 2.99892  | 3.03155              | 0.03263              | 245     | 220             | 33.50              | 37.72             |
| Midbrain                     | 17     | 3.00713  | 3.11560              | 0.10847              | 412     | 387             | 17.73              | 19.96             |
| Pons                         | 18     | 3.01357  | 3.10230              | 0.08873              | 249     | 224             | 12.54              | 14.12             |
| Medulla                      | 19     | 3.02283  | 3.13237              | 0.10954              | 333     | 308             | 13.97              | 15.73             |
| Cerebellum                   | 20     | 2.99515  | 3.24980              | 0.25465              | 509     | 484             | 9.44               | 10.63             |
| Superficial Nodes (2)        | 21     | 3.00818  | 3.06520              | 0.05702              | 2653    | 2628            | 229.03             | 257.83            |
| Cervical Nodes (2)           | 22     | 3.01536  | 3.02760              | 0.01224              | 934     | 909             | 369.04             | 415.45            |
| Thyroid                      | 23     | 3.01850  | 3.03765              | 0.01915              | 1436    | 1411            | 366.14             | 412.18            |
| Olfactory Epithelium         | 24     | 3.00826  | 3.09204              | 0.08378              | 30677   | 30652           | 1,818.07           | 2,046.68          |
| Respiratory Epithelium       | 25     | 3.00807  | 3.05351              | 0.04544              | 7606834 | 7606809         | 831,873.45         | 936,475.67        |
| Axillary Nodes (2)           | 26     | 2.98510  | 3.03222              | 0.04712              | 185     | 160             | 16.87              | 19.00             |
| Muscle (R, deltoid)          | 27     | 2.97873  | 3.03162              | 0.05289              | 155     | 130             | 12.21              | 13.75             |
| Liver (R, superficial lobe)  | 28     | 2.95973  | 2.99403              | 0.03430              | 147     | 122             | 17.67              | 19.90             |
| Kidney (L, tip)              | 29     | 2.98407  | 3.04523              | 0.06116              | 824     | 799             | 64.92              | 73.08             |
| Lung (R, top lobe)           | 30     | 2.98606  | 3.01080              | 0.02474              | 177     | 152             | 30.53              | 34.37             |
| Trachea (near cut-off)       | 31     | 2.97477  | 2.99130              | 0.01653              | 87      | 62              | 18.64              | 20.98             |
| Esophagus (near cut-off)     | 32     | 2.97534  | 2.98817              | 0.01283              | 95      | 70              | 27.11              | 30.52             |
| Spleen (tip)                 | 33     | 2.96855  | 3.02257              | 0.05402              | 299     | 274             | 25.21              | 28.37             |
| Heart                        | 34     | 2.98157  | 3.03719              | 0.05562              | 230     | 205             | 18.32              | 20.62             |
| Urine (fill to line of tube) | 35     | 2.98117  | 3.20921              | 0.22804              | 5871    | 5846            | 127.39             | 143.41            |
| Spinal Dura                  | 36     | 3.01163  | 3.02460              | 0.01297              | 48      | 23              | 8.81               | 9.92              |
| Lower Cervical Spinal Cord   | 37     | 2.96450  | 3.09272              | 0.12822              | 173     | 148             | 5.74               | 6.46              |
| Thoracic Spinal Cord         | 38     | 2.99392  | 3.08834              | 0.09442              | 105     | 80              | 4.21               | 4.74              |
| Lumbar Spinal Cord           | 39     | 2.96464  | 3.12538              | 0.16074              | 97      | 72              | 2.23               | 2.51              |
| Blood Sample                 | 40     | 3.01196  | 3.17154              | 0.15958              | 2036    | 2011            | 62.62              | 70.50             |
| Drug Standard                | 41     | 2.98671  | 2.98913              | 0.00242              | 4198456 | 4198431         | 8,621,140.67       | 9,705,188.21      |
| Drug Standard                | 42     | 2.98968  | 2.99237              | 0.00269              | 4368613 | 4368588         | 8,070,155.18       | 9,084,920.19      |
| Drug Standard                | 43     | 3.03508  | 3.03806              | 0.00298              | 4418531 | 4418506         | 7,368,044.87       | 8,294,524.47      |
|                              |        |          |                      |                      |         |                 | 0.201<br>cpm/fmol  | 0.179<br>cpm/fmol |

| Auto Calculations                                        | Enter Values                        |
|----------------------------------------------------------|-------------------------------------|
| Total uL of Dose Sol = 63.2                              | Oxytocin Molecular Weight = 1,007   |
| Hot mg = 0.0000                                          | Date of Synthesis = 10/23/07        |
| Cold mg = 0.5138                                         | Hot uCi/uL at Synthesis = 2.320     |
| Total mg in Dose Sol = 0.5138                            | Hot uCi/ug at Synthesis = 1985.72   |
| Conc Of Dose Sol (ug/uL) = 8.1294                        | Cold ug/uL = 15.00                  |
| Days after Synthesis Delivered = 13                      | Desired uCi = 45.0                  |
| Decay on Day Delivered = 0.8606                          | Desired mg = 0.400                  |
| Total uCi in Dose Sol on Day Delivered = 57.80           | Estimated Desired nmol = 397.1      |
| uCi/uL in Dose Sol on Day Delivered = 0.9146             | <b>Date of Delivery = 11/05/07</b>  |
| mg delivered = 0.400                                     | <b>uL delivered (actual) = 49.2</b> |
| uCi delivered = 45.00                                    | <b>Date of Counting = 11/05/07</b>  |
| Estimated nmol delivered = 397.11                        | <b>Dose Calculator</b>              |
| Days after Synthesis Counted = 13                        | uL Hot to Deliver = 22.54           |
| Decay on Day Counted = 0.8606                            | uL Cold to Deliver = 26.66          |
| Specific Activity from Amersham Specs (cpm/fmol) = 0.201 | Total uL to Deliver = 49.20         |
| Avg. Volume of Standard (uL)* = 3.0                      | Hot to Cold Ratio = 0.85            |
| Avg. CPM-bkgd of Standard = 4,328,508                    | Total uL to Make = 63.20            |
| Specific Activity from Standards: (CPM/fmol) = 0.179     | Dose Solution uL Hot = 28.95        |
| Date of Disposal from Decay Storage = 06/14/09           | Dose Solution uL Cold = 34.25       |

**Table B02: Intranasal Oxytocin with 1% Mucoadhesive Rat 21 Data**

| Oxytocin Rat 21<br>1% Mucoadhesive | Route | Com-pound | Volume<br>(uL) | uCi   | mg    | Time (min) | Perfused @ (min) |
|------------------------------------|-------|-----------|----------------|-------|-------|------------|------------------|
| Amount Delivered:                  | IN    | Oxytocin  | 49             | 45.00 | 0.400 | 14:09      | 30:15            |

| Tissue Description           | Tube # | Tube (g) | Tissue +<br>Tube (g) | Tissue<br>Weight (g) | CPM     | CPM -25<br>bkgd | nM<br>(Spec. Act.) | nM (Stan.)        |
|------------------------------|--------|----------|----------------------|----------------------|---------|-----------------|--------------------|-------------------|
| Dorsal Dura                  | 1      | 3.03168  | 3.03976              | 0.00808              | 233     | 208             | 127.92             | 144.01            |
| Ventral Dura                 | 2      | 2.98387  | 2.98632              | 0.00245              | 232     | 207             | 419.85             | 472.65            |
| Trigeminal Ganglion          | 3      | 3.04312  | 3.06940              | 0.02628              | 1514    | 1489            | 281.55             | 316.96            |
| Maxillary Nerve              | 4      | 3.01412  | 3.02912              | 0.01500              | 867     | 842             | 278.94             | 314.02            |
| Ophthalmic Nerve             | 5      | 2.98637  | 2.98808              | 0.00171              | 86      | 61              | 177.27             | 199.56            |
| Mandibular Nerve             | 6      | 3.00495  | 3.00950              | 0.00455              | 431     | 406             | 443.41             | 499.17            |
| Upper Cervical Spinal Cord   | 7      | 2.99007  | 3.08064              | 0.09057              | 270     | 245             | 13.44              | 15.13             |
| Olfactory Bulbs              | 8      | 3.01541  | 3.09803              | 0.08262              | 423     | 398             | 23.94              | 26.95             |
| Anterior Olfactory Nucleus   | 9      | 3.01102  | 3.05191              | 0.04089              | 112     | 87              | 10.57              | 11.90             |
| Frontal Cortex               | 10     | 2.99878  | 3.04156              | 0.04278              | 218     | 193             | 22.42              | 25.24             |
| Caudate/Putamen              | 11     | 3.02605  | 3.03898              | 0.01293              | 61      | 36              | 13.84              | 15.58             |
| Septal Nucleus               | 12     | 3.00033  | 3.01282              | 0.01249              | 47      | 22              | 8.75               | 9.85              |
| Parietal Cortex              | 13     | 2.98356  | 3.04015              | 0.05659              | 297     | 272             | 23.88              | 26.89             |
| Hippocampus                  | 14     | 2.99936  | 3.02596              | 0.02660              | 569     | 544             | 101.63             | 114.41            |
| Thalamus                     | 15     | 2.98311  | 3.06430              | 0.08119              | 366     | 341             | 20.87              | 23.50             |
| Hypothalamus                 | 16     | 2.99281  | 3.03425              | 0.04144              | 202     | 177             | 21.22              | 23.89             |
| Midbrain                     | 17     | 2.98923  | 3.10434              | 0.11511              | 315     | 290             | 12.52              | 14.09             |
| Pons                         | 18     | 3.01015  | 3.08552              | 0.07537              | 135     | 110             | 7.25               | 8.16              |
| Medulla                      | 19     | 2.99494  | 3.09868              | 0.10374              | 250     | 225             | 10.78              | 12.13             |
| Cerebellum                   | 20     | 2.99353  | 3.24292              | 0.24939              | 936     | 911             | 18.15              | 20.43             |
| Superficial Nodes (2)        | 21     | 3.00190  | 3.08798              | 0.08608              | 3588    | 3563            | 205.69             | 231.55            |
| Cervical Nodes (2)           | 22     | 3.01696  | 3.02806              | 0.01110              | 508     | 483             | 216.23             | 243.42            |
| Thyroid                      | 23     | 3.00139  | 3.02739              | 0.02600              | 1780    | 1755            | 335.43             | 377.60            |
| Olfactory Epithelium         | 24     | 2.99459  | 3.07700              | 0.08241              | 72007   | 71982           | 4,340.47           | 4,886.26          |
| Respiratory Epithelium       | 25     | 3.00721  | 3.05975              | 0.05254              | 7906400 | 7906375         | 747,791.32         | 841,820.79        |
| Axillary Nodes (2)           | 26     | 2.98505  | 3.03747              | 0.05242              | 190     | 165             | 15.64              | 17.61             |
| Muscle (R, deltoid)          | 27     | 3.00960  | 3.06575              | 0.05615              | 137     | 112             | 9.91               | 11.16             |
| Liver (R, superficial lobe)  | 28     | 2.98985  | 3.02105              | 0.03120              | 121     | 96              | 15.29              | 17.21             |
| Kidney (L, tip)              | 29     | 3.00411  | 3.06033              | 0.05622              | 611     | 586             | 51.80              | 58.31             |
| Lung (R, top lobe)           | 30     | 2.98670  | 3.02036              | 0.03366              | 127     | 102             | 15.06              | 16.95             |
| Trachea (near cut-off)       | 31     | 2.98586  | 3.00009              | 0.01423              | 62      | 37              | 12.92              | 14.55             |
| Esophagus (near cut-off)     | 32     | 2.96667  | 2.98691              | 0.02024              | 75      | 50              | 12.28              | 13.82             |
| Spleen (tip)                 | 33     | 2.99023  | 3.04292              | 0.05269              | 172     | 147             | 13.86              | 15.61             |
| Heart                        | 34     | 2.96089  | 3.00579              | 0.04490              | 116     | 91              | 10.07              | 11.34             |
| Urine (fill to line of tube) | 35     | 3.00335  | 3.34015              | 0.33680              | 4201    | 4176            | 61.61              | 69.36             |
| Spinal Dura                  | 36     | 2.97996  | 2.99782              | 0.01786              | 50      | 25              | 6.96               | 7.83              |
| Lower Cervical Spinal Cord   | 37     | 2.99794  | 3.13591              | 0.13797              | 156     | 131             | 4.72               | 5.31              |
| Thoracic Spinal Cord         | 38     | 2.96608  | 3.03225              | 0.06617              | 77      | 52              | 3.91               | 4.40              |
| Lumbar Spinal Cord           | 39     | 2.96142  | 3.07964              | 0.11822              | 94      | 69              | 2.90               | 3.27              |
| Blood Sample                 | 40     | 2.98097  | 3.24396              | 0.26299              | 2141    | 2116            | 39.98              | 45.01             |
| Drug Standard                | 41     | 2.98671  | 2.98913              | 0.00242              | 4198456 | 4198431         | 8,621,140.67       | 9,705,188.21      |
| Drug Standard                | 42     | 2.98968  | 2.99237              | 0.00269              | 4368613 | 4368588         | 8,070,155.18       | 9,084,920.19      |
| Drug Standard                | 43     | 3.03508  | 3.03806              | 0.00298              | 4418531 | 4418506         | 7,368,044.87       | 8,294,524.47      |
|                              |        |          |                      |                      |         |                 | 0.201<br>cpm/fmol  | 0.179<br>cpm/fmol |

| Auto Calculations                                        | Enter Values                        |
|----------------------------------------------------------|-------------------------------------|
| Total uL of Dose Sol = 63.2                              | Oxytocin Molecular Weight = 1,007   |
| Hot mg = 0.0000                                          | Date of Synthesis = 10/23/07        |
| Cold mg = 0.5138                                         | Hot uCi/uL at Synthesis = 2.320     |
| Total mg in Dose Sol = 0.5138                            | Hot uCi/ug at Synthesis = 1985.72   |
| Conc Of Dose Sol (ug/uL) = 8.1294                        | Cold ug/uL = 15.00                  |
| Days after Synthesis Delivered = 13                      | Desired uCi = 45.0                  |
| Decay on Day Delivered = 0.8606                          | Desired mg = 0.400                  |
| Total uCi in Dose Sol on Day Delivered = 57.80           | Estimated Desired nmol = 397.1      |
| uCi/uL in Dose Sol on Day Delivered = 0.9146             | <b>Date of Delivery = 11/05/07</b>  |
| mg delivered = 0.400                                     | <b>uL delivered (actual) = 49.2</b> |
| uCi delivered = 45.00                                    | <b>Date of Counting = 11/05/07</b>  |
| Estimated nmol delivered = 397.11                        | <b>Dose Calculator</b>              |
| Days after Synthesis Counted = 13                        | uL Hot to Deliver = 22.54           |
| Decay on Day Counted = 0.8606                            | uL Cold to Deliver = 26.66          |
| Specific Activity from Amersham Specs (cpm/fmol) = 0.201 | Total uL to Deliver = 49.20         |
| Avg. Volume of Standard (uL)* = 3.0                      | Hot to Cold Ratio = 0.85            |
| Avg. CPM-bkgd of Standard = 4,328,508                    | Total uL to Make = 63.20            |
| Specific Activity from Standards: (CPM/fmol) = 0.179     | Dose Solution uL Hot = 28.95        |
| Date of Disposal from Decay Storage = 06/14/09           | Dose Solution uL Cold = 34.25       |

**Table B03: Intranasal Oxytocin with 1% Mucoadhesive Rat 22 Data**

| Oxytocin Rat 22<br>1% Mucoadhesive | Route | Compound | Volume (uL) | uCi   | mg    | Time (min) | Perfused @ (min) |
|------------------------------------|-------|----------|-------------|-------|-------|------------|------------------|
| Amount Delivered:                  | IN    | Oxytocin | 49          | 45.00 | 0.400 | 14:01      | 30:54            |

| Tissue Description           | Tube # | Tube (g) | Tissue + Tube (g) | Tissue Weight (g) | CPM      | CPM -25 bkgd | nM (Spec. Act.)   | nM (Stan.)        |
|------------------------------|--------|----------|-------------------|-------------------|----------|--------------|-------------------|-------------------|
| Dorsal Dura                  | 1      | 2.99965  | 3.01136           | 0.01171           | 3183     | 3158         | 1,340.13          | 1,624.60          |
| Ventral Dura                 | 2      | 3.00631  | 3.01105           | 0.00474           | 206      | 181          | 189.76            | 230.03            |
| Trigeminal Ganglion          | 3      | -        | -                 | -                 | -        | -            | -                 | -                 |
| Maxillary Nerve              | 4      | 3.06881  | 3.08023           | 0.01142           | 1223     | 1198         | 521.30            | 631.95            |
| Ophthalmic Nerve             | 5      | 3.00388  | 3.00754           | 0.00366           | 233      | 208          | 282.41            | 342.35            |
| Mandibular Nerve             | 6      | 3.00305  | 3.00649           | 0.00344           | 239      | 214          | 309.14            | 374.76            |
| Upper Cervical Spinal Cord   | 7      | -        | -                 | -                 | -        | -            | -                 | -                 |
| Olfactory Bulbs              | 8      | -        | -                 | -                 | -        | -            | -                 | -                 |
| Anterior Olfactory Nucleus   | 9      | -        | -                 | -                 | -        | -            | -                 | -                 |
| Frontal Cortex               | 10     | -        | -                 | -                 | -        | -            | -                 | -                 |
| Caudate/Putamen              | 11     | -        | -                 | -                 | -        | -            | -                 | -                 |
| Septal Nucleus               | 12     | -        | -                 | -                 | -        | -            | -                 | -                 |
| Parietal Cortex              | 13     | -        | -                 | -                 | -        | -            | -                 | -                 |
| Hippocampus                  | 14     | -        | -                 | -                 | -        | -            | -                 | -                 |
| Thalamus                     | 15     | -        | -                 | -                 | -        | -            | -                 | -                 |
| Hypothalamus                 | 16     | -        | -                 | -                 | -        | -            | -                 | -                 |
| Midbrain                     | 17     | -        | -                 | -                 | -        | -            | -                 | -                 |
| Pons                         | 18     | -        | -                 | -                 | -        | -            | -                 | -                 |
| Medulla                      | 19     | -        | -                 | -                 | -        | -            | -                 | -                 |
| Cerebellum                   | 20     | -        | -                 | -                 | -        | -            | -                 | -                 |
| Superficial Nodes (2)        | 21     | 3.00359  | 3.06589           | 0.06230           | 5050     | 5025         | 400.81            | 485.89            |
| Cervical Nodes (2)           | 22     | 3.00276  | 3.01465           | 0.01189           | 387      | 362          | 151.29            | 183.41            |
| Thyroid                      | 23     | 2.99326  | 3.00732           | 0.01406           | 1662     | 1637         | 578.57            | 701.38            |
| Olfactory Epithelium         | 24     | 3.06889  | 3.15659           | 0.08770           | 77780    | 77755        | 4,405.77          | 5,340.98          |
| Respiratory Epithelium       | 25     | 2.99815  | 3.09872           | 0.10057           | 12165611 | 12165586     | 601,115.13        | 728,713.76        |
| Axillary Nodes (2)           | 26     | 2.96352  | 2.99690           | 0.03338           | 110      | 85           | 12.65             | 15.34             |
| Muscle (R, deltoid)          | 27     | 3.04280  | 3.08534           | 0.04254           | 90       | 65           | 7.59              | 9.20              |
| Liver (R, superficial lobe)  | 28     | 2.97986  | 3.02637           | 0.04651           | 95       | 70           | 7.48              | 9.07              |
| Kidney (L, tip)              | 29     | 3.03778  | 3.08085           | 0.04307           | 566      | 541          | 62.42             | 75.67             |
| Lung (R, top lobe)           | 30     | 2.98589  | 3.02190           | 0.03601           | 181      | 156          | 21.53             | 26.10             |
| Trachea (near cut-off)       | 31     | 3.00535  | 3.01869           | 0.01334           | 196      | 171          | 63.70             | 77.22             |
| Esophagus (near cut-off)     | 32     | 3.01151  | 3.02436           | 0.01285           | 69       | 44           | 17.02             | 20.63             |
| Spleen (tip)                 | 33     | 2.98255  | 3.02679           | 0.04424           | 355      | 330          | 37.07             | 44.94             |
| Heart                        | 34     | 2.96741  | 3.00037           | 0.03296           | 114      | 89           | 13.42             | 16.27             |
| Urine (fill to line of tube) | 35     | 2.98388  | 3.40482           | 0.42094           | 10148    | 10123        | 119.50            | 144.87            |
| Spinal Dura                  | 36     | 2.97636  | 2.99114           | 0.01478           | 84       | 59           | 19.84             | 24.05             |
| Lower Cervical Spinal Cord   | 37     | 2.97951  | 3.05705           | 0.07754           | 77       | 52           | 3.33              | 4.04              |
| Thoracic Spinal Cord         | 38     | 2.97464  | 3.08862           | 0.11398           | 130      | 105          | 4.58              | 5.55              |
| Lumbar Spinal Cord           | 39     | 2.97697  | 3.10175           | 0.12478           | 101      | 76           | 3.03              | 3.67              |
| Blood Sample                 | 40     | 3.01261  | 3.21175           | 0.19914           | 3459     | 3434         | 85.69             | 103.88            |
| Drug Standard                | 41     | 2.98686  | 2.98968           | 0.00282           | 4313108  | 4313083      | 7,600,318.37      | 9,213,636.98      |
| Drug Standard                | 42     | 2.98104  | 2.98340           | 0.00236           | 3786456  | 3786431      | 7,972,804.62      | 9,665,190.84      |
| Drug Standard                | 43     | 3.00139  | 3.00370           | 0.00231           | 3895357  | 3895332      | 8,379,644.14      | 10,158,390.14     |
|                              |        |          |                   |                   |          |              | 0.201<br>cpm/fmol | 0.166<br>cpm/fmol |

| Auto Calculations                                        | Enter Values                        |
|----------------------------------------------------------|-------------------------------------|
| Total uL of Dose Sol = 63.5                              | Oxytocin Molecular Weight = 1,007   |
| Hot mg = 0.0000                                          | Date of Synthesis = 10/23/07        |
| Cold mg = 0.5132                                         | Hot uCi/uL at Synthesis = 2.320     |
| Total mg in Dose Sol = 0.5132                            | Hot uCi/ug at Synthesis = 1985.72   |
| Conc Of Dose Sol (ug/uL) = 8.0864                        | Cold ug/uL = 15.00                  |
| Days after Synthesis Delivered = 14                      | Desired uCi = 45.0                  |
| Decay on Day Delivered = 0.8507                          | Desired mg = 0.400                  |
| Total uCi in Dose Sol on Day Delivered = 57.74           | Estimated Desired nmol = 397.1      |
| uCi/uL in Dose Sol on Day Delivered = 0.9097             | <b>Date of Delivery = 11/06/07</b>  |
| mg delivered = 0.400                                     | <b>uL delivered (actual) = 49.5</b> |
| uCi delivered = 45.00                                    | <b>Date of Counting = 11/06/07</b>  |
| Estimated nmol delivered = 397.18                        | <b>Dose Calculator</b>              |
| Days after Synthesis Counted = 14                        | uL Hot to Deliver = 22.80           |
| Decay on Day Counted = 0.8507                            | uL Cold to Deliver = 26.66          |
| Specific Activity from Amersham Specs (cpm/fmol) = 0.201 | Total uL to Deliver = 49.47         |
| Avg. Volume of Standard (uL)* = 3.0                      | Hot to Cold Ratio = 0.86            |
| Avg. CPM-bkgd of Standard = 3,998,282                    | Total uL to Make = 63.47            |
| Specific Activity from Standards: (CPM/fmol) = 0.166     | Dose Solution uL Hot = 29.25        |
| Date of Disposal from Decay Storage = 06/14/09           | Dose Solution uL Cold = 34.21       |

**Table B04: Intranasal Oxytocin with 1% Mucoadhesive Rat 23 Data**

| Trigemina Rat 23 Mucoadhesive | Route | Com-pound | Volume (uL) | uCi   | mg    | Time (min) | Perfused @ (min) |
|-------------------------------|-------|-----------|-------------|-------|-------|------------|------------------|
| Amount Delivered:             | IN    | Oxytocin  | 49          | 45.00 | 0.400 | 14:00      | 31:00            |

| Tissue Description           | Tube # | Tube (g) | Tissue + Tube (g) | Tissue Weight (g) | CPM     | CPM -25 bkgd | nM (Spec. Act.)   | nM (Stan.)        |
|------------------------------|--------|----------|-------------------|-------------------|---------|--------------|-------------------|-------------------|
| Dorsal Dura                  | 1      | 2.98582  | 2.99724           | 0.01142           | 997     | 972          | 422.95            | 512.73            |
| Ventral Dura                 | 2      | 3.06049  | 3.06807           | 0.00758           | 1804    | 1779         | 1,166.27          | 1,413.84          |
| Trigeminal Ganglion          | 3      | -        | -                 | -                 | -       | -            | -                 | -                 |
| Maxillary Nerve              | 4      | 3.02559  | 3.03795           | 0.01236           | 2136    | 2111         | 848.72            | 1,028.87          |
| Ophthalmic Nerve             | 5      | 2.99823  | 3.00119           | 0.00296           | 8545    | 8520         | 14,303.46         | 17,339.65         |
| Mandibular Nerve             | 6      | 3.00763  | 3.01046           | 0.00283           | 80      | 55           | 96.58             | 117.08            |
| Upper Cervical Spinal Cord   | 7      | -        | -                 | -                 | -       | -            | -                 | -                 |
| Olfactory Bulbs              | 8      | -        | -                 | -                 | -       | -            | -                 | -                 |
| Anterior Olfactory Nucleus   | 9      | -        | -                 | -                 | -       | -            | -                 | -                 |
| Frontal Cortex               | 10     | -        | -                 | -                 | -       | -            | -                 | -                 |
| Caudate/Putamen              | 11     | -        | -                 | -                 | -       | -            | -                 | -                 |
| Septal Nucleus               | 12     | -        | -                 | -                 | -       | -            | -                 | -                 |
| Parietal Cortex              | 13     | -        | -                 | -                 | -       | -            | -                 | -                 |
| Hippocampus                  | 14     | -        | -                 | -                 | -       | -            | -                 | -                 |
| Thalamus                     | 15     | -        | -                 | -                 | -       | -            | -                 | -                 |
| Hypothalamus                 | 16     | -        | -                 | -                 | -       | -            | -                 | -                 |
| Midbrain                     | 17     | -        | -                 | -                 | -       | -            | -                 | -                 |
| Pons                         | 18     | -        | -                 | -                 | -       | -            | -                 | -                 |
| Medulla                      | 19     | -        | -                 | -                 | -       | -            | -                 | -                 |
| Cerebellum                   | 20     | -        | -                 | -                 | -       | -            | -                 | -                 |
| Superficial Nodes (2)        | 21     | 3.02616  | 3.09234           | 0.06618           | 6938    | 6913         | 519.08            | 629.26            |
| Cervical Nodes (2)           | 22     | 2.98011  | 2.99293           | 0.01282           | 4026    | 4001         | 1,550.86          | 1,880.07          |
| Thyroid                      | 23     | 3.00222  | 3.03193           | 0.02971           | 3348    | 3323         | 555.80            | 673.78            |
| Olfactory Epithelium         | 24     | 3.05125  | 3.16680           | 0.11555           | 75128   | 75103        | 3,229.84          | 3,915.43          |
| Respiratory Epithelium       | 25     | 2.98944  | 3.04809           | 0.05865           | 9422413 | 9422388      | 798,336.61        | 967,799.42        |
| Axillary Nodes (2)           | 26     | 2.98499  | 3.02167           | 0.03668           | 828     | 803          | 108.79            | 131.88            |
| Muscle (R, deltoid)          | 27     | 2.96440  | 3.02878           | 0.06438           | 219     | 194          | 14.97             | 18.15             |
| Liver (R, superficial lobe)  | 28     | 2.98408  | 3.02615           | 0.04207           | 143     | 118          | 13.94             | 16.90             |
| Kidney (L, tip)              | 29     | 3.00856  | 3.05706           | 0.04850           | 605     | 580          | 59.43             | 72.04             |
| Lung (R, top lobe)           | 30     | 3.01013  | 3.05282           | 0.04269           | 679     | 654          | 76.13             | 92.29             |
| Trachea (near cut-off)       | 31     | 2.95869  | 2.97296           | 0.01427           | 79      | 54           | 18.80             | 22.80             |
| Esophagus (near cut-off)     | 32     | 3.00569  | 3.02089           | 0.01520           | 82      | 57           | 18.63             | 22.59             |
| Spleen (tip)                 | 33     | 2.97859  | 3.03186           | 0.05327           | 275     | 250          | 23.32             | 28.27             |
| Heart                        | 34     | 2.98641  | 3.05754           | 0.07113           | 204     | 179          | 12.51             | 15.16             |
| Urine (fill to line of tube) | 35     | 2.99160  | 3.33452           | 0.34292           | 5785    | 5760         | 83.47             | 101.19            |
| Spinal Dura                  | 36     | 2.99243  | 3.01023           | 0.01780           | 64      | 39           | 10.89             | 13.20             |
| Lower Cervical Spinal Cord   | 37     | 2.96120  | 3.06573           | 0.10453           | 112     | 87           | 4.14              | 5.01              |
| Thoracic Spinal Cord         | 38     | 2.96865  | 3.04466           | 0.07601           | 83      | 58           | 3.79              | 4.60              |
| Lumbar Spinal Cord           | 39     | 2.99066  | 3.13569           | 0.14503           | 139     | 114          | 3.91              | 4.74              |
| Blood Sample                 | 40     | 3.00522  | 3.29062           | 0.28540           | 5666    | 5641         | 98.22             | 119.07            |
| Drug Standard                | 41     | 2.98686  | 2.98968           | 0.00282           | 4313108 | 4313083      | 7,600,318.37      | 9,213,636.98      |
| Drug Standard                | 42     | 2.98104  | 2.98340           | 0.00236           | 3786456 | 3786431      | 7,972,804.62      | 9,665,190.84      |
| Drug Standard                | 43     | 3.00139  | 3.00370           | 0.00231           | 3895357 | 3895332      | 8,379,644.14      | 10,158,390.14     |
|                              |        |          |                   |                   |         |              | 0.201<br>cpm/fmol | 0.166<br>cpm/fmol |

| Auto Calculations                                        | Enter Values                         |
|----------------------------------------------------------|--------------------------------------|
| Total uL of Dose Sol = 63.5                              | Oxytocin Molecular Weight = 1,007    |
| Hot mg = 0.0000                                          | Date of Synthesis = 10/23/07         |
| Cold mg = 0.5132                                         | Hot uCi/uL at Synthesis = 2.320      |
| Total mg in Dose Sol = 0.5132                            | Hot uCi/ug at Synthesis = 1985.72    |
| Conc Of Dose Sol (ug/uL) = 8.0864                        | Cold ug/uL = 15.00                   |
| Days after Synthesis Delivered = 14                      | Desired uCi = 45.0                   |
| Decay on Day Delivered = 0.8507                          | Desired mg = 0.400                   |
| Total uCi in Dose Sol on Day Delivered = 57.74           | Estimated Desired nmol = 397.1       |
| uCi/uL in Dose Sol on Day Delivered = 0.9097             | <b>Date of Delivery = 11/06/07</b>   |
| mg delivered = 0.400                                     | <b>uL delivered (actual) = 49.47</b> |
| uCi delivered = 45.00                                    | <b>Date of Counting = 11/06/07</b>   |
| Estimated nmol delivered = 397.18                        | <b>Dose Calculator</b>               |
| Days after Synthesis Counted = 14                        | uL Hot to Deliver = 22.80            |
| Decay on Day Counted = 0.8507                            | uL Cold to Deliver = 26.66           |
| Specific Activity from Amersham Specs (cpm/fmol) = 0.201 | Total uL to Deliver = 49.47          |
| Avg. Volume of Standard (uL)* = 3.0                      | Hot to Cold Ratio = 0.86             |
| Avg. CPM-bkgd of Standard = 3,998,282                    | Total uL to Make = 63.47             |
| Specific Activity from Standards: (CPM/fmol) = 0.166     | Dose Solution uL Hot = 29.25         |
| Date of Disposal from Decay Storage = 06/14/09           | Dose Solution uL Cold = 34.21        |

**Table B05: Intranasal Oxytocin with 1% Mucoadhesive Rat 24 Data**

| Oxytocin Rat 24<br>1% Mucoadhesive | Route | Compound | Volume (uL) | uCi   | mg    | Time (min) | Perfused @ (min) |
|------------------------------------|-------|----------|-------------|-------|-------|------------|------------------|
| Amount Delivered:                  | IN    | Oxytocin | 50          | 45.00 | 0.400 | 14:01      | 30:49            |

| Tissue Description           | Tube # | Tube (g) | Tissue + Tube (g) | Tissue Weight (g) | CPM     | CPM -25 bkgd | nM (Spec. Act.) | nM (Stan.)   |
|------------------------------|--------|----------|-------------------|-------------------|---------|--------------|-----------------|--------------|
| Dorsal Dura                  | 1      | 2.99937  | 3.01807           | 0.01870           | 92529   | 92504        | 24,581.70       | 30,678.79    |
| Ventral Dura                 | 2      | 3.00429  | 3.01351           | 0.00922           | 2851    | 2826         | 1,523.12        | 1,900.91     |
| Trigeminal Ganglion          | 3      | 3.00626  | 3.03313           | 0.02687           | 3801    | 3776         | 698.32          | 871.53       |
| Maxillary Nerve              | 4      | 2.99649  | 3.00988           | 0.01339           | 5089    | 5064         | 1,879.34        | 2,345.48     |
| Ophthalmic Nerve             | 5      | 2.97717  | 2.97992           | 0.00275           | 149     | 124          | 224.07          | 279.65       |
| Mandibular Nerve             | 6      | 3.00318  | 3.00751           | 0.00433           | 1069    | 1044         | 1,198.13        | 1,495.31     |
| Upper Cervical Spinal Cord   | 7      | 2.99515  | 3.01624           | 0.02109           | 4207    | 4182         | 985.37          | 1,229.78     |
| Olfactory Bulbs              | 8      | 2.99619  | 3.05790           | 0.06171           | 40944   | 40919        | 3,295.05        | 4,112.34     |
| Anterior Olfactory Nucleus   | 9      | 3.00165  | 3.03138           | 0.02973           | 1437    | 1412         | 236.01          | 294.55       |
| Frontal Cortex               | 10     | 2.99054  | 3.02533           | 0.03479           | 12062   | 12037        | 1,719.32        | 2,145.77     |
| Caudate/Putamen              | 11     | 2.99063  | 3.00210           | 0.01147           | 366     | 341          | 147.74          | 184.38       |
| Septal Nucleus               | 12     | 3.00755  | 3.02014           | 0.01259           | 219     | 194          | 76.57           | 95.56        |
| Parietal Cortex              | 13     | 3.00010  | 3.04152           | 0.04142           | 2482    | 2457         | 294.77          | 367.89       |
| Hippocampus                  | 14     | 2.98032  | 3.01289           | 0.03257           | 315     | 290          | 44.25           | 55.22        |
| Thalamus                     | 15     | 2.99894  | 3.06547           | 0.06653           | 688     | 663          | 49.52           | 61.80        |
| Hypothalamus                 | 16     | 3.00174  | 3.03521           | 0.03347           | 472     | 447          | 66.37           | 82.83        |
| Midbrain                     | 17     | 2.98951  | 3.08513           | 0.09562           | 937     | 912          | 47.40           | 59.15        |
| Pons                         | 18     | 2.99955  | 3.08111           | 0.08156           | 1119    | 1094         | 66.66           | 83.19        |
| Medulla                      | 19     | 3.06294  | 3.15041           | 0.08747           | 928     | 903          | 51.30           | 64.02        |
| Cerebellum                   | 20     | 2.98832  | 3.21646           | 0.22814           | 2958    | 2933         | 63.89           | 79.73        |
| Superficial Nodes (2)        | 21     | 2.99955  | 3.05503           | 0.05548           | 3159    | 3134         | 280.71          | 350.33       |
| Cervical Nodes (2)           | 22     | 3.00281  | 3.01324           | 0.01043           | 670     | 645          | 307.30          | 383.53       |
| Thyroid                      | 23     | 3.02371  | 3.04179           | 0.01808           | 4015    | 3990         | 1,096.65        | 1,368.65     |
| Olfactory Epithelium         | 24     | 2.98884  | 3.09191           | 0.10307           | 524964  | 524939       | 25,308.69       | 31,586.09    |
| Respiratory Epithelium       | 25     | 3.00320  | 3.06993           | 0.06673           | 7607904 | 7607879      | 566,546.48      | 707,068.91   |
| Axillary Nodes (2)           | 26     | 3.00937  | 3.04714           | 0.03777           | 239     | 214          | 28.16           | 35.14        |
| Muscle (R, deltoid)          | 27     | 2.96065  | 2.99832           | 0.03767           | 410     | 385          | 50.79           | 63.38        |
| Liver (R, superficial lobe)  | 28     | 3.00536  | 3.04689           | 0.04153           | 280     | 255          | 30.51           | 38.08        |
| Kidney (L, tip)              | 29     | 2.98661  | 3.05080           | 0.06419           | 850     | 825          | 63.87           | 79.71        |
| Lung (R, top lobe)           | 30     | 2.99072  | 3.03469           | 0.04397           | 368     | 343          | 38.76           | 48.38        |
| Trachea (near cut-off)       | 31     | 2.98443  | 3.00388           | 0.01945           | 159     | 134          | 34.24           | 42.73        |
| Esophagus (near cut-off)     | 32     | 2.98392  | 2.99629           | 0.01237           | 174     | 149          | 59.86           | 74.70        |
| Spleen (tip)                 | 33     | 2.98241  | 3.03706           | 0.05465           | 317     | 292          | 26.55           | 33.14        |
| Heart                        | 34     | 2.98244  | 3.03869           | 0.05625           | 622     | 597          | 52.74           | 65.82        |
| Urine (fill to line of tube) | 35     | 2.98080  | 3.19902           | 0.21822           | 5262    | 5237         | 119.26          | 148.84       |
| Spinal Dura                  | 36     | 3.01043  | 3.02924           | 0.01881           | 206     | 181          | 47.82           | 59.68        |
| Lower Cervical Spinal Cord   | 37     | 2.98939  | 3.13236           | 0.14297           | 553     | 528          | 18.35           | 22.90        |
| Thoracic Spinal Cord         | 38     | 2.99668  | 3.07345           | 0.07677           | 106     | 81           | 5.24            | 6.54         |
| Lumbar Spinal Cord           | 39     | 2.98741  | 3.13594           | 0.14853           | 178     | 153          | 5.12            | 6.39         |
| Blood Sample                 | 40     | 3.01451  | 3.26334           | 0.24883           | 4275    | 4250         | 84.87           | 105.93       |
| Drug Standard                | 41     | 2.97243  | 2.97553           | 0.00310           | 4106874 | 4106849      | 6,583,246.52    | 8,216,111.27 |
| Drug Standard                | 42     | 2.97523  | 2.97759           | 0.00236           | 3553839 | 3553814      | 7,483,000.40    | 9,339,034.12 |
| Drug Standard                | 43     | 2.98994  | 2.99245           | 0.00251           | 3866330 | 3866305      | 7,654,476.02    | 9,553,041.42 |
|                              |        |          |                   |                   |         |              | 0.201           | 0.161        |
|                              |        |          |                   |                   |         |              | cpm/fmol        | cpm/fmol     |

| Auto Calculations                                        | Enter Values                        |
|----------------------------------------------------------|-------------------------------------|
| Total uL of Dose Sol = 64.0                              | Oxytocin Molecular Weight = 1,007   |
| Hot mg = 0.0000                                          | Date of Synthesis = 10/23/07        |
| Cold mg = 0.5120                                         | Hot uCi/uL at Synthesis = 2.320     |
| Total mg in Dose Sol = 0.5120                            | Hot uCi/ug at Synthesis = 1985.72   |
| Conc Of Dose Sol (ug/uL) = 8.0002                        | Cold ug/uL = 15.00                  |
| Days after Synthesis Delivered = 16                      | Desired uCi = 45.0                  |
| Decay on Day Delivered = 0.8313                          | Desired mg = 0.400                  |
| Total uCi in Dose Sol on Day Delivered = 57.60           | Estimated Desired nmol = 397.1      |
| uCi/uL in Dose Sol on Day Delivered = 0.9000             | <b>Date of Delivery = 11/08/07</b>  |
| mg delivered = 0.400                                     | <b>uL delivered (actual) = 50.0</b> |
| uCi delivered = 45.00                                    | <b>Date of Counting = 11/08/07</b>  |
| Estimated nmol delivered = 397.16                        | <b>Dose Calculator</b>              |
| Days after Synthesis Counted = 16                        | uL Hot to Deliver = 23.33           |
| Decay on Day Counted = 0.8313                            | uL Cold to Deliver = 26.66          |
| Specific Activity from Amersham Specs (cpm/fmol) = 0.201 | Total uL to Deliver = 50.00         |
| Avg. Volume of Standard (uL)* = 3.0                      | Hot to Cold Ratio = 0.88            |
| Avg. CPM-bkgd of Standard = 3,842,323                    | Total uL to Make = 64.00            |
| Specific Activity from Standards: (CPM/fmol) = 0.161     | Dose Solution uL Hot = 29.87        |
| Date of Disposal from Decay Storage = 06/14/09           | Dose Solution uL Cold = 34.13       |

**Table B06: Intranasal Oxytocin with 1% Mucoadhesive Rat 25 Data**

| Oxytocin Rat 25<br>Mucoadhesive | 1% | Route | Com-pound | Volume<br>(uL) | uCi   | mg    | Time (min) | Perfused @ (min) |
|---------------------------------|----|-------|-----------|----------------|-------|-------|------------|------------------|
| Amount Delivered:               |    | IN    | Oxytocin  | 50             | 45.00 | 0.400 | 14:02      | 30:43            |

| Tissue Description           | Tube # | Tube (g) | Tissue +<br>Tube (g) | Tissue<br>Weight (g) | CPM     | CPM -25<br>bkqd | nM<br>(Spec. Act.) | nM (Stan.)        |
|------------------------------|--------|----------|----------------------|----------------------|---------|-----------------|--------------------|-------------------|
| Dorsal Dura                  | 1      | 3.06509  | 3.07431              | 0.00922              | 1622    | 1597            | 860.73             | 1,074.22          |
| Ventral Dura                 | 2      | 2.97885  | 2.98575              | 0.00690              | 2400    | 2375            | 1,710.44           | 2,134.68          |
| Trigeminal Ganglion          | 3      | 2.99956  | 3.02011              | 0.02055              | 1742    | 1717            | 415.19             | 518.18            |
| Maxillary Nerve              | 4      | 3.06364  | 3.07840              | 0.01476              | 1072    | 1047            | 352.50             | 439.93            |
| Ophthalmic Nerve             | 5      | 2.99799  | 3.00141              | 0.00342              | 250     | 225             | 326.93             | 408.01            |
| Mandibular Nerve             | 6      | 3.00477  | 3.00775              | 0.00298              | 274     | 249             | 415.22             | 518.21            |
| Upper Cervical Spinal Cord   | 7      | 2.99026  | 3.01463              | 0.02437              | 481     | 456             | 92.98              | 116.05            |
| Olfactory Bulbs              | 8      | 2.98140  | 3.04304              | 0.06164              | 3360    | 3335            | 268.86             | 335.55            |
| Anterior Olfactory Nucleus   | 9      | 3.01568  | 3.05813              | 0.04245              | 494     | 469             | 54.90              | 68.52             |
| Frontal Cortex               | 10     | 3.00780  | 3.04782              | 0.04002              | 1068    | 1043            | 129.51             | 161.63            |
| Caudate/Putamen              | 11     | 3.00351  | 3.01514              | 0.01163              | 185     | 160             | 68.36              | 85.32             |
| Septal Nucleus               | 12     | 2.99364  | 3.00563              | 0.01199              | 74      | 49              | 20.31              | 25.35             |
| Parietal Cortex              | 13     | 3.00208  | 3.05372              | 0.05164              | 400     | 375             | 36.09              | 45.04             |
| Hippocampus                  | 14     | 2.99440  | 3.02473              | 0.03033              | 1005    | 980             | 160.56             | 200.39            |
| Thalamus                     | 15     | 3.03251  | 3.10840              | 0.07589              | 164     | 139             | 9.10               | 11.36             |
| Hypothalamus                 | 16     | 2.99208  | 3.01043              | 0.01835              | 113     | 88              | 23.83              | 29.74             |
| Midbrain                     | 17     | 3.01488  | 3.12801              | 0.11313              | 531     | 506             | 22.23              | 27.74             |
| Pons                         | 18     | 3.01302  | 3.08639              | 0.07337              | 1911    | 1886            | 127.74             | 159.42            |
| Medulla                      | 19     | 3.01183  | 3.08777              | 0.07594              | 607     | 582             | 38.08              | 47.53             |
| Cerebellum                   | 20     | 3.01252  | 3.23150              | 0.21898              | 828     | 803             | 18.22              | 22.74             |
| Superficial Nodes (2)        | 21     | 3.01659  | 3.07100              | 0.05441              | 5113    | 5088            | 464.69             | 579.95            |
| Cervical Nodes (2)           | 22     | 2.99075  | 3.00205              | 0.01130              | 1504    | 1479            | 650.40             | 811.73            |
| Thyroid                      | 23     | 3.01133  | 3.02734              | 0.01601              | 6190    | 6165            | 1,913.53           | 2,388.15          |
| Olfactory Epithelium         | 24     | 3.00401  | 3.13038              | 0.12637              | 684765  | 684740          | 26,926.18          | 33,604.77         |
| Respiratory Epithelium       | 25     | 3.00664  | 3.09055              | 0.08391              | 8834457 | 8834432         | 523,188.26         | 652,956.40        |
| Axillary Nodes (2)           | 26     | 2.98789  | 3.04656              | 0.05867              | 185     | 160             | 13.55              | 16.91             |
| Muscle (R, deltoid)          | 27     | 2.98618  | 3.04030              | 0.05412              | 153     | 128             | 11.75              | 14.67             |
| Liver (R, superficial lobe)  | 28     | 2.98136  | 3.04484              | 0.06348              | 480     | 455             | 35.62              | 44.45             |
| Kidney (L, tip)              | 29     | 2.98182  | 3.04078              | 0.05896              | 884     | 859             | 72.40              | 90.36             |
| Lung (R, top lobe)           | 30     | 2.97562  | 3.02903              | 0.05341              | 107     | 82              | 7.63               | 9.52              |
| Trachea (near cut-off)       | 31     | 2.98022  | 2.99267              | 0.01245              | 78      | 53              | 21.15              | 26.40             |
| Esophagus (near cut-off)     | 32     | 2.96436  | 2.97566              | 0.01130              | 91      | 66              | 29.02              | 36.22             |
| Spleen (tip)                 | 33     | 2.99041  | 3.06405              | 0.07364              | 321     | 296             | 19.97              | 24.93             |
| Heart                        | 34     | 2.98204  | 3.06180              | 0.07976              | 167     | 142             | 8.85               | 11.04             |
| Urine (fill to line of tube) | 35     | 2.96215  | 3.19034              | 0.22819              | 7146    | 7121            | 155.07             | 193.54            |
| Spinal Dura                  | 36     | 2.99410  | 3.00548              | 0.01138              | 72      | 47              | 20.52              | 25.61             |
| Lower Cervical Spinal Cord   | 37     | 2.97737  | 3.10890              | 0.13153              | 136     | 111             | 4.19               | 5.23              |
| Thoracic Spinal Cord         | 38     | 2.99052  | 3.07162              | 0.08110              | 86      | 61              | 3.74               | 4.66              |
| Lumbar Spinal Cord           | 39     | 2.98144  | 3.10157              | 0.12013              | 168     | 143             | 5.92               | 7.38              |
| Blood Sample                 | 40     | 3.06922  | 3.37518              | 0.30596              | 6088    | 6063            | 98.47              | 122.90            |
| Drug Standard                | 41     | 2.97243  | 2.97553              | 0.00310              | 4106874 | 4106849         | 6,583,246.52       | 8,216,111.27      |
| Drug Standard                | 42     | 2.97523  | 2.97759              | 0.00236              | 3553839 | 3553814         | 7,483,000.40       | 9,339,034.12      |
| Drug Standard                | 43     | 2.98994  | 2.99245              | 0.00251              | 3866330 | 3866305         | 7,654,476.02       | 9,553,041.42      |
|                              |        |          |                      |                      |         |                 | 0.201<br>cpm/fmol  | 0.161<br>cpm/fmol |

| Auto Calculations                                        | Enter Values                        |
|----------------------------------------------------------|-------------------------------------|
| Total uL of Dose Sol = 64.0                              | Oxytocin Molecular Weight = 1,007   |
| Hot mg = 0.0000                                          | Date of Synthesis = 10/23/07        |
| Cold mg = 0.5120                                         | Hot uCi/uL at Synthesis = 2.320     |
| Total mg in Dose Sol = 0.5120                            | Hot uCi/ug at Synthesis = 1985.72   |
| Conc Of Dose Sol (ug/uL) = 8.0002                        | Cold ug/uL = 15.00                  |
| Days after Synthesis Delivered = 16                      | Desired uCi = 45.0                  |
| Decay on Day Delivered = 0.8313                          | Desired mg = 0.400                  |
| Total uCi in Dose Sol on Day Delivered = 57.60           | Estimated Desired nmol = 397.1      |
| uCi/uL in Dose Sol on Day Delivered = 0.9000             | <b>Date of Delivery = 11/08/07</b>  |
| mg delivered = 0.400                                     | <b>uL delivered (actual) = 50.0</b> |
| uCi delivered = 45.00                                    | <b>Date of Counting = 11/08/07</b>  |
| Estimated nmol delivered = 397.16                        | <b>Dose Calculator</b>              |
| Days after Synthesis Counted = 16                        | uL Hot to Deliver = 23.33           |
| Decay on Day Counted = 0.8313                            | uL Cold to Deliver = 26.66          |
| Specific Activity from Amersham Specs (cpm/fmol) = 0.201 | Total uL to Deliver = 50.00         |
| Avg. Volume of Standard (uL)* = 3.0                      | Hot to Cold Ratio = 0.88            |
| Avg. CPM-bkqd of Standard = 3,842,323                    | Total uL to Make = 64.00            |
| Specific Activity from Standards: (CPM/fmol) = 0.161     | Dose Solution uL Hot = 29.87        |
| Date of Disposal from Decay Storage = 06/14/09           | Dose Solution uL Cold = 34.13       |

**Table B07: Intranasal Oxytocin with 1% Mucoadhesive Rat 26 Data**

| Oxytocin Rat 26<br>1% Mucoadhesive | Route | Compound | Volume (uL) | uCi   | mg    | Time (min) | Perfused @ (min) |
|------------------------------------|-------|----------|-------------|-------|-------|------------|------------------|
| Amount Delivered:                  | IN    | Oxytocin | 51          | 45.00 | 0.400 | 14:00      | 31:09            |

| Tissue Description           | Tube # | Tube (g) | Tissue + Tube (g) | Tissue Weight (g) | CPM     | CPM -25 bkgd | nM (Spec. Act.)   | nM (Stan.)        |
|------------------------------|--------|----------|-------------------|-------------------|---------|--------------|-------------------|-------------------|
| Dorsal Dura                  | 1      | 3.05301  | 3.06175           | 0.00874           | 850     | 825          | 469.07            | 563.77            |
| Ventral Dura                 | 2      | 3.00241  | 3.01101           | 0.00860           | 221     | 196          | 113.25            | 136.12            |
| Trigeminal Ganglion          | 3      | 3.02941  | 3.04959           | 0.02018           | 909     | 884          | 217.68            | 261.63            |
| Maxillary Nerve              | 4      | 2.98391  | 2.99632           | 0.01241           | 518     | 493          | 197.41            | 237.26            |
| Ophthalmic Nerve             | 5      | 2.99237  | 2.99481           | 0.00244           | 105     | 80           | 162.93            | 195.82            |
| Mandibular Nerve             | 6      | 2.98942  | 2.99220           | 0.00278           | 121     | 96           | 171.60            | 206.24            |
| Upper Cervical Spinal Cord   | 7      | 2.97847  | 3.03742           | 0.05895           | 1119    | 1094         | 92.22             | 110.84            |
| Olfactory Bulbs              | 8      | 3.00059  | 3.06612           | 0.06553           | 518     | 493          | 37.39             | 44.93             |
| Anterior Olfactory Nucleus   | 9      | 2.99945  | 3.03377           | 0.03432           | 265     | 240          | 34.75             | 41.77             |
| Frontal Cortex               | 10     | 2.97630  | 3.01668           | 0.04038           | 2159    | 2134         | 262.62            | 315.63            |
| Caudate/Putamen              | 11     | 3.00367  | 3.01615           | 0.01248           | 55      | 30           | 11.95             | 14.36             |
| Septal Nucleus               | 12     | 3.02260  | 3.03416           | 0.01156           | 50      | 25           | 10.75             | 12.92             |
| Parietal Cortex              | 13     | 2.99867  | 3.04162           | 0.04295           | 90      | 65           | 7.52              | 9.04              |
| Hippocampus                  | 14     | 2.99596  | 3.02775           | 0.03179           | 92      | 67           | 10.47             | 12.59             |
| Thalamus                     | 15     | 2.99565  | 3.06520           | 0.06955           | 104     | 79           | 5.64              | 6.78              |
| Hypothalamus                 | 16     | 3.00210  | 3.02663           | 0.02453           | 122     | 97           | 19.65             | 23.62             |
| Midbrain                     | 17     | 3.00654  | 3.09816           | 0.09162           | 7311    | 7286         | 395.18            | 474.96            |
| Pons                         | 18     | 3.00289  | 3.07210           | 0.06921           | 8648    | 8623         | 619.13            | 744.12            |
| Medulla                      | 19     | 2.98931  | 3.07256           | 0.08325           | 39674   | 39649        | 2,366.69          | 2,844.49          |
| Cerebellum                   | 20     | 2.99906  | 3.22635           | 0.22729           | 11767   | 11742        | 256.72            | 308.54            |
| Superficial Nodes (2)        | 21     | 2.99069  | 3.03977           | 0.04908           | 2479    | 2454         | 248.46            | 298.62            |
| Cervical Nodes (2)           | 22     | 3.01167  | 3.02323           | 0.01156           | 175     | 150          | 64.48             | 77.50             |
| Thyroid                      | 23     | 2.99738  | 3.01631           | 0.01893           | 2955    | 2930         | 769.15            | 924.43            |
| Olfactory Epithelium         | 24     | 3.03211  | 3.11273           | 0.08062           | 66379   | 66354        | 4,089.94          | 4,915.64          |
| Respiratory Epithelium       | 25     | 3.02664  | 3.08248           | 0.05584           | 9520238 | 9520213      | 847,216.36        | 1,018,256.72      |
| Axillary Nodes (2)           | 26     | 2.98223  | 3.03660           | 0.05437           | 251     | 226          | 20.66             | 24.83             |
| Muscle (R, deltoid)          | 27     | 2.98712  | 3.01919           | 0.03207           | 127     | 102          | 15.80             | 19.00             |
| Liver (R, superficial lobe)  | 28     | 2.98993  | 3.05224           | 0.06231           | 147     | 122          | 9.73              | 11.69             |
| Kidney (L, tip)              | 29     | 2.97460  | 3.02989           | 0.05529           | 921     | 896          | 80.53             | 96.79             |
| Lung (R, top lobe)           | 30     | 2.97617  | 3.00797           | 0.03180           | 124     | 99           | 15.47             | 18.59             |
| Trachea (near cut-off)       | 31     | 2.96170  | 2.97370           | 0.01200           | 118     | 93           | 38.51             | 46.29             |
| Esophagus (near cut-off)     | 32     | 2.99086  | 3.00206           | 0.01120           | 101     | 76           | 33.72             | 40.53             |
| Spleen (tip)                 | 33     | 3.03713  | 3.09907           | 0.06194           | 316     | 291          | 23.35             | 28.06             |
| Heart                        | 34     | 2.97533  | 3.02561           | 0.05028           | 127     | 102          | 10.08             | 12.12             |
| Urine (fill to line of tube) | 35     | 3.00560  | 3.13318           | 0.12758           | 1140    | 1115         | 43.43             | 52.20             |
| Spinal Dura                  | 36     | 2.99496  | 3.00567           | 0.01071           | 46      | 21           | 9.74              | 11.71             |
| Lower Cervical Spinal Cord   | 37     | 2.97313  | 3.09295           | 0.11982           | 96      | 71           | 2.94              | 3.54              |
| Thoracic Spinal Cord         | 38     | 2.97827  | 3.06142           | 0.08315           | 109     | 84           | 5.02              | 6.03              |
| Lumbar Spinal Cord           | 39     | 2.98438  | 3.10733           | 0.12295           | 118     | 93           | 3.76              | 4.52              |
| Blood Sample                 | 40     | 3.00403  | 3.26335           | 0.25932           | 4471    | 4446         | 85.20             | 102.40            |
| Drug Standard                | 41     | 2.98173  | 2.98445           | 0.00272           | 4006261 | 4006236      | 7,319,150.92      | 8,796,778.44      |
| Drug Standard                | 42     | 2.98482  | 2.98733           | 0.00251           | 3976173 | 3976148      | 7,871,942.21      | 9,461,170.05      |
| Drug Standard                | 43     | 2.97320  | 2.97620           | 0.00300           | 3728798 | 3728773      | 6,176,433.47      | 7,423,363.36      |
|                              |        |          |                   |                   |         |              | 0.201<br>cpm/fmol | 0.167<br>cpm/fmol |

| Auto Calculations                                        | Enter Values                        |
|----------------------------------------------------------|-------------------------------------|
| Total uL of Dose Sol = 65.1                              | Oxytocin Molecular Weight = 1,007   |
| Hot mg = 0.0000                                          | Date of Synthesis = 10/23/07        |
| Cold mg = 0.5095                                         | Hot uCi/uL at Synthesis = 2.320     |
| Total mg in Dose Sol = 0.5096                            | Hot uCi/ug at Synthesis = 1985.72   |
| Conc Of Dose Sol (ug/uL) = 7.8275                        | Cold ug/uL = 15.00                  |
| Days after Synthesis Delivered = 20                      | Desired uCi = 45.0                  |
| Decay on Day Delivered = 0.7937                          | Desired mg = 0.400                  |
| Total uCi in Dose Sol on Day Delivered = 57.33           | Estimated Desired nmol = 397.1      |
| uCi/uL in Dose Sol on Day Delivered = 0.8806             | <b>Date of Delivery = 11/12/07</b>  |
| mg delivered = 0.400                                     | <b>uL delivered (actual) = 51.1</b> |
| uCi delivered = 45.00                                    | <b>Date of Counting = 11/12/07</b>  |
| Estimated nmol delivered = 397.13                        | <b>Dose Calculator</b>              |
| Days after Synthesis Counted = 20                        | uL Hot to Deliver = 24.44           |
| Decay on Day Counted = 0.7937                            | uL Cold to Deliver = 26.66          |
| Specific Activity from Amersham Specs (cpm/fmol) = 0.201 | Total uL to Deliver = 51.10         |
| Avg. Volume of Standard (uL)* = 3.0                      | Hot to Cold Ratio = 0.92            |
| Avg. CPM-bkgd of Standard = 3,903,719                    | Total uL to Make = 65.10            |
| Specific Activity from Standards: (CPM/fmol) = 0.167     | Dose Solution uL Hot = 31.13        |
| Date of Disposal from Decay Storage = 06/14/09           | Dose Solution uL Cold = 33.97       |

**Table B08: Intranasal Oxytocin with 1% Mucoadhesive Rat 27 Data**

| Oxytocin Rat 27<br>1% Mucoadhesive | Route | Com-pound | Volume<br>(uL) | uCi   | mg    | Time (min) | Perfused @ (min) |
|------------------------------------|-------|-----------|----------------|-------|-------|------------|------------------|
| Amount Delivered:                  | IN    | Oxytocin  | 51             | 45.00 | 0.400 | 14:00      | 30:44            |

| Tissue Description           | Tube # | Tube (g) | Tissue +<br>Tube (g) | Tissue<br>Weight (g) | CPM     | CPM -25<br>bkgd | nM<br>(Spec. Act.) | nM (Stan.)        |
|------------------------------|--------|----------|----------------------|----------------------|---------|-----------------|--------------------|-------------------|
| Dorsal Dura                  | 1      | 3.00560  | 3.01523              | 0.00963              | 2014    | 1989            | 1,026.36           | 1,233.88          |
| Ventral Dura                 | 2      | 3.00574  | 3.01220              | 0.00646              | 85      | 60              | 46.15              | 55.49             |
| Trigeminal Ganglion          | 3      | 3.00739  | 3.02555              | 0.01816              | 433     | 408             | 111.64             | 134.22            |
| Maxillary Nerve              | 4      | 3.02403  | 3.03877              | 0.01474              | 250     | 225             | 75.85              | 91.19             |
| Ophthalmic Nerve             | 5      | 3.01997  | 3.02282              | 0.00285              | 301     | 276             | 481.24             | 578.53            |
| Mandibular Nerve             | 6      | 2.99055  | 2.99475              | 0.00420              | 1025    | 1000            | 1,183.16           | 1,422.38          |
| Upper Cervical Spinal Cord   | 7      | 3.00200  | 3.04222              | 0.04022              | 266     | 241             | 29.78              | 35.80             |
| Olfactory Bulbs              | 8      | 3.00942  | 3.08607              | 0.07665              | 317     | 292             | 18.93              | 22.76             |
| Anterior Olfactory Nucleus   | 9      | 3.01308  | 3.05551              | 0.04243              | 100     | 75              | 8.78               | 10.56             |
| Frontal Cortex               | 10     | 2.98853  | 3.02790              | 0.03937              | 91      | 66              | 8.33               | 10.01             |
| Caudate/Putamen              | 11     | 2.99918  | 3.01130              | 0.01212              | 59      | 34              | 13.94              | 16.76             |
| Septal Nucleus               | 12     | 3.00726  | 3.01766              | 0.01040              | 40      | 15              | 7.17               | 8.62              |
| Parietal Cortex              | 13     | 3.00402  | 3.03103              | 0.02701              | 622     | 597             | 109.84             | 132.04            |
| Hippocampus                  | 14     | 2.99569  | 3.03246              | 0.03677              | 76      | 51              | 6.89               | 8.29              |
| Thalamus                     | 15     | 2.97721  | 3.05270              | 0.07549              | 149     | 124             | 8.16               | 9.81              |
| Hypothalamus                 | 16     | 2.99146  | 3.01107              | 0.01961              | 184     | 159             | 40.29              | 48.44             |
| Midbrain                     | 17     | 3.00193  | 3.11524              | 0.11331              | 153     | 128             | 5.61               | 6.75              |
| Pons                         | 18     | 3.01505  | 3.08219              | 0.06714              | 527     | 502             | 37.15              | 44.67             |
| Medulla                      | 19     | 2.98697  | 3.07230              | 0.08533              | 284     | 259             | 15.08              | 18.13             |
| Cerebellum                   | 20     | 3.00270  | 3.24745              | 0.24475              | 414     | 389             | 7.90               | 9.49              |
| Superficial Nodes (2)        | 21     | 2.99193  | 3.05344              | 0.06151              | 1907    | 1882            | 152.04             | 182.78            |
| Cervical Nodes (2)           | 22     | 2.99716  | 3.00390              | 0.00674              | 243     | 218             | 160.73             | 193.22            |
| Thyroid                      | 23     | 3.00783  | 3.02959              | 0.02176              | 6683    | 6658            | 1,520.47           | 1,827.88          |
| Olfactory Epithelium         | 24     | 3.00253  | 3.07620              | 0.07367              | 23422   | 23397           | 1,578.20           | 1,897.29          |
| Respiratory Epithelium       | 25     | 2.99401  | 3.03552              | 0.04151              | 7436123 | 7436098         | 890,195.61         | 1,070,177.75      |
| Axillary Nodes (2)           | 26     | 3.04293  | 3.08290              | 0.03997              | 837     | 812             | 100.95             | 121.36            |
| Muscle (R, deltoid)          | 27     | 2.97848  | 3.01767              | 0.03919              | 121     | 96              | 12.17              | 14.63             |
| Liver (R, superficial lobe)  | 28     | 2.97309  | 3.02767              | 0.05458              | 142     | 117             | 10.65              | 12.81             |
| Kidney (L, tip)              | 29     | 3.00222  | 3.04575              | 0.04353              | 130     | 105             | 11.99              | 14.41             |
| Lung (R, top lobe)           | 30     | 2.98715  | 3.03178              | 0.04463              | 159     | 134             | 14.92              | 17.94             |
| Trachea (near cut-off)       | 31     | 2.99587  | 3.01248              | 0.01661              | 111     | 86              | 25.73              | 30.93             |
| Esophagus (near cut-off)     | 32     | 2.97622  | 2.99691              | 0.02069              | 103     | 78              | 18.73              | 22.52             |
| Spleen (tip)                 | 33     | 2.97912  | 3.02506              | 0.04594              | 309     | 284             | 30.72              | 36.93             |
| Heart                        | 34     | 2.96953  | 3.01544              | 0.04591              | 116     | 91              | 9.85               | 11.84             |
| Urine (fill to line of tube) | 35     | 2.97152  | 3.26962              | 0.29810              | 4819    | 4794            | 79.92              | 96.07             |
| Spinal Dura                  | 36     | 2.96045  | 2.97384              | 0.01339              | 55      | 30              | 11.13              | 13.38             |
| Lower Cervical Spinal Cord   | 37     | 3.04703  | 3.18277              | 0.13574              | 98      | 73              | 2.67               | 3.21              |
| Thoracic Spinal Cord         | 38     | 2.99367  | 3.06419              | 0.07052              | 80      | 55              | 3.88               | 4.66              |
| Lumbar Spinal Cord           | 39     | 3.00774  | 3.13202              | 0.12428              | 92      | 67              | 2.68               | 3.22              |
| Blood Sample                 | 40     | 3.05948  | 3.31928              | 0.25980              | 3925    | 3900            | 74.60              | 89.68             |
| Drug Standard                | 41     | 2.98173  | 2.98445              | 0.00272              | 4002385 | 4002360         | 7,312,069.70       | 8,790,443.63      |
| Drug Standard                | 42     | 2.98482  | 2.98733              | 0.00251              | 3981003 | 3980978         | 7,881,504.60       | 9,475,008.41      |
| Drug Standard                | 43     | 2.97320  | 2.97620              | 0.00300              | 3724945 | 3724920         | 6,170,051.26       | 7,417,528.83      |
|                              |        |          |                      |                      |         |                 | 0.201<br>cpm/fmol  | 0.167<br>cpm/fmol |

| Auto Calculations                                        | Enter Values                        |
|----------------------------------------------------------|-------------------------------------|
| Total uL of Dose Sol = 65.1                              | Oxytocin Molecular Weight = 1,007   |
| Hot mg = 0.0000                                          | Date of Synthesis = 10/23/07        |
| Cold mg = 0.5095                                         | Hot uCi/uL at Synthesis = 2.320     |
| Total mg in Dose Sol = 0.5096                            | Hot uCi/ug at Synthesis = 1985.72   |
| Conc Of Dose Sol (ug/uL) = 7.8275                        | Cold ug/uL = 15.00                  |
| Days after Synthesis Delivered = 20                      | Desired uCi = 45.0                  |
| Decay on Day Delivered = 0.7937                          | Desired mg = 0.400                  |
| Total uCi in Dose Sol on Day Delivered = 57.33           | Estimated Desired nmol = 397.1      |
| uCi/uL in Dose Sol on Day Delivered = 0.8806             | <b>Date of Delivery = 11/12/07</b>  |
| mg delivered = 0.400                                     | <b>uL delivered (actual) = 51.1</b> |
| uCi delivered = 45.00                                    | <b>Date of Counting = 11/12/07</b>  |
| Estimated nmol delivered = 397.13                        | <b>Dose Calculator</b>              |
| Days after Synthesis Counted = 20                        | uL Hot to Deliver = 24.44           |
| Decay on Day Counted = 0.7937                            | uL Cold to Deliver = 26.66          |
| Specific Activity from Amersham Specs (cpm/fmol) = 0.201 | Total uL to Deliver = 51.10         |
| Avg. Volume of Standard (uL)* = 3.0                      | Hot to Cold Ratio = 0.92            |
| Avg. CPM-bkgd of Standard = 3,902,753                    | Total uL to Make = 65.10            |
| Specific Activity from Standards: (CPM/fmol) = 0.167     | Dose Solution uL Hot = 31.13        |
| Date of Disposal from Decay Storage = 06/14/09           | Dose Solution uL Cold = 33.97       |



**Table B09: Intranasal Oxytocin with 1% Mucoadhesive Rat 28 Data**

| Oxytocin Rat 28<br>1% Mucoadhesive | Route | Compound | Volume (uL) | uCi   | mg    | Time (min) | Perfused @ (min) |
|------------------------------------|-------|----------|-------------|-------|-------|------------|------------------|
| Amount Delivered:                  | IN    | Oxytocin | 51          | 45.00 | 0.400 | 14:00      | 30:45            |

  

| Tissue Description           | Tube # | Tube (g) | Tissue + Tube (g) | Tissue Weight (g) | CPM     | CPM -25 bkgd | nM (Spec. Act.)   | nM (Stan.)        |
|------------------------------|--------|----------|-------------------|-------------------|---------|--------------|-------------------|-------------------|
| Dorsal Dura                  | 1      | 3.02854  | 3.04022           | 0.01168           | 1330    | 1305         | 555.21            | 661.99            |
| Ventral Dura                 | 2      | 2.99814  | 3.00656           | 0.00842           | 769     | 744          | 439.09            | 523.53            |
| Trigeminal Ganglion          | 3      | -        | -                 | -                 | -       | -            | -                 | -                 |
| Maxillary Nerve              | 4      | 3.01082  | 3.01964           | 0.00882           | 868     | 843          | 474.95            | 566.29            |
| Ophthalmic Nerve             | 5      | 3.00718  | 3.01107           | 0.00389           | 133     | 108          | 137.96            | 164.50            |
| Mandibular Nerve             | 6      | 3.01185  | 3.01576           | 0.00391           | 206     | 181          | 230.04            | 274.27            |
| Upper Cervical Spinal Cord   | 7      | -        | -                 | -                 | -       | -            | -                 | -                 |
| Olfactory Bulbs              | 8      | -        | -                 | -                 | -       | -            | -                 | -                 |
| Anterior Olfactory Nucleus   | 9      | -        | -                 | -                 | -       | -            | -                 | -                 |
| Frontal Cortex               | 10     | -        | -                 | -                 | -       | -            | -                 | -                 |
| Caudate/Putamen              | 11     | -        | -                 | -                 | -       | -            | -                 | -                 |
| Septal Nucleus               | 12     | -        | -                 | -                 | -       | -            | -                 | -                 |
| Parietal Cortex              | 13     | -        | -                 | -                 | -       | -            | -                 | -                 |
| Hippocampus                  | 14     | -        | -                 | -                 | -       | -            | -                 | -                 |
| Thalamus                     | 15     | -        | -                 | -                 | -       | -            | -                 | -                 |
| Hypothalamus                 | 16     | -        | -                 | -                 | -       | -            | -                 | -                 |
| Midbrain                     | 17     | -        | -                 | -                 | -       | -            | -                 | -                 |
| Pons                         | 18     | -        | -                 | -                 | -       | -            | -                 | -                 |
| Medulla                      | 19     | -        | -                 | -                 | -       | -            | -                 | -                 |
| Cerebellum                   | 20     | -        | -                 | -                 | -       | -            | -                 | -                 |
| Superficial Nodes (2)        | 21     | 3.04997  | 3.14435           | 0.09438           | 8853    | 8828         | 464.81            | 554.20            |
| Cervical Nodes (2)           | 22     | 3.00824  | 3.01559           | 0.00735           | 752     | 727          | 491.52            | 586.04            |
| Thyroid                      | 23     | 3.01634  | 3.03239           | 0.01605           | 1771    | 1746         | 540.58            | 644.54            |
| Olfactory Epithelium         | 24     | 2.99949  | 3.09256           | 0.09307           | 49468   | 49443        | 2,639.90          | 3,147.58          |
| Respiratory Epithelium       | 25     | 3.01904  | 3.09068           | 0.07164           | 9716987 | 9716962      | 674,012.58        | 803,630.94        |
| Axillary Nodes (2)           | 26     | 2.97481  | 3.01752           | 0.04271           | 174     | 149          | 17.34             | 20.67             |
| Muscle (R, deltoid)          | 27     | 2.99074  | 3.02378           | 0.03304           | 113     | 88           | 13.24             | 15.78             |
| Liver (R, superficial lobe)  | 28     | 2.99162  | 3.04690           | 0.05528           | 162     | 137          | 12.32             | 14.68             |
| Kidney (L, tip)              | 29     | 2.98106  | 3.02397           | 0.04291           | 1021    | 996          | 115.34            | 137.53            |
| Lung (R, top lobe)           | 30     | 2.98104  | 3.00742           | 0.02638           | 186     | 161          | 30.33             | 36.16             |
| Trachea (near cut-off)       | 31     | 2.99739  | 3.01026           | 0.01287           | 115     | 90           | 34.75             | 41.43             |
| Esophagus (near cut-off)     | 32     | 2.96868  | 2.98310           | 0.01442           | 93      | 68           | 23.43             | 27.94             |
| Spleen (tip)                 | 33     | 2.96639  | 3.02766           | 0.06127           | 367     | 342          | 27.74             | 33.07             |
| Heart                        | 34     | 2.97750  | 3.02805           | 0.05055           | 133     | 108          | 10.62             | 12.66             |
| Urine (fill to line of tube) | 35     | 2.97818  | 3.30223           | 0.32405           | 6590    | 6565         | 100.67            | 120.03            |
| Spinal Dura                  | 36     | 2.96444  | 2.97801           | 0.01357           | 61      | 36           | 13.18             | 15.72             |
| Lower Cervical Spinal Cord   | 37     | 2.98888  | 3.09116           | 0.10228           | 140     | 115          | 5.59              | 6.66              |
| Thoracic Spinal Cord         | 38     | 3.01242  | 3.09384           | 0.08142           | 331     | 306          | 18.68             | 22.27             |
| Lumbar Spinal Cord           | 39     | 3.04109  | 3.16201           | 0.12092           | 140     | 115          | 4.73              | 5.63              |
| Blood Sample                 | 40     | 3.01237  | 3.26762           | 0.25525           | 3706    | 3681         | 71.66             | 85.44             |
| Drug Standard                | 41     | 2.96774  | 2.97025           | 0.00251           | 3937667 | 3937642      | 7,795,708.37      | 9,294,889.50      |
| Drug Standard                | 42     | 3.03959  | 3.04223           | 0.00264           | 3795240 | 3795215      | 7,143,738.26      | 8,517,539.99      |
| Drug Standard                | 43     | 2.97394  | 2.97646           | 0.00252           | 4007175 | 4007150      | 7,901,838.26      | 9,421,429.07      |
|                              |        |          |                   |                   |         |              | 0.201<br>cpm/fmol | 0.169<br>cpm/fmol |

| Auto Calculations                                        | Enter Values                        |
|----------------------------------------------------------|-------------------------------------|
| Total uL of Dose Sol = 65.4                              | Oxytocin Molecular Weight = 1,007   |
| Hot mg = 0.0000                                          | Date of Synthesis = 10/23/07        |
| Cold mg = 0.5089                                         | Hot uCi/uL at Synthesis = 2.320     |
| Total mg in Dose Sol = 0.5090                            | Hot uCi/ug at Synthesis = 1985.72   |
| Conc Of Dose Sol (ug/uL) = 7.7843                        | Cold ug/uL = 15.00                  |
| Days after Synthesis Delivered = 21                      | Desired uCi = 45.0                  |
| Decay on Day Delivered = 0.7846                          | Desired mg = 0.400                  |
| Total uCi in Dose Sol on Day Delivered = 57.26           | Estimated Desired nmol = 397.1      |
| uCi/uL in Dose Sol on Day Delivered = 0.8757             | <b>Date of Delivery = 11/13/07</b>  |
| mg delivered = 0.400                                     | <b>uL delivered (actual) = 51.4</b> |
| uCi delivered = 45.00                                    | <b>Date of Counting = 11/13/07</b>  |
| Estimated nmol delivered = 397.18                        | <b>Dose Calculator</b>              |
| Days after Synthesis Counted = 21                        | uL Hot to Deliver = 24.72           |
| Decay on Day Delivered = 0.7846                          | uL Cold to Deliver = 26.66          |
| Specific Activity from Amersham Specs (cpm/fmol) = 0.201 | Total uL to Deliver = 51.39         |
| Avg. Volume of Standard (uL)* = 3.0                      | Hot to Cold Ratio = 0.93            |
| Avg. CPM-bkgd of Standard = 3,913,336                    | Total uL to Make = 65.39            |
| Specific Activity from Standards: (CPM/fmol) = 0.169     | Dose Solution uL Hot = 31.46        |
| Date of Disposal from Decay Storage = 06/14/09           | Dose Solution uL Cold = 33.93       |

**Table B10: Intranasal Oxytocin with 1% Mucoadhesive Rat 29 Data**

| Oxytocin Rat 29<br>1% Mucoadhesive | Route | Compound | Volume (uL) | uCi   | mg    | Time (min) | Perfused @ (min) |
|------------------------------------|-------|----------|-------------|-------|-------|------------|------------------|
| Amount Delivered:                  | IN    | Oxytocin | 51          | 45.00 | 0.400 | 14:00      | 30:40            |

| Tissue Description           | Tube # | Tube (g) | Tissue + Tube (g) | Tissue Weight (g) | CPM     | CPM -25 bkgd | nM (Spec. Act.)   | nM (Stan.)        |
|------------------------------|--------|----------|-------------------|-------------------|---------|--------------|-------------------|-------------------|
| Dorsal Dura                  | 1      | 2.99684  | 3.00983           | 0.01299           | 418     | 393          | 150.34            | 179.25            |
| Ventral Dura                 | 2      | 3.00642  | 3.02774           | 0.02132           | 10040   | 10015        | 2,334.30          | 2,783.21          |
| Trigeminal Ganglion          | 3      | -        | -                 | -                 | -       | -            | -                 | -                 |
| Maxillary Nerve              | 4      | 3.05699  | 3.06579           | 0.00880           | 464     | 439          | 247.90            | 295.57            |
| Ophthalmic Nerve             | 5      | 3.01789  | 3.02003           | 0.00214           | 162     | 137          | 318.13            | 379.30            |
| Mandibular Nerve             | 6      | 2.99528  | 2.99876           | 0.00348           | 951     | 926          | 1,322.28          | 1,576.57          |
| Upper Cervical Spinal Cord   | 7      | -        | -                 | -                 | -       | -            | -                 | -                 |
| Olfactory Bulbs              | 8      | -        | -                 | -                 | -       | -            | -                 | -                 |
| Anterior Olfactory Nucleus   | 9      | -        | -                 | -                 | -       | -            | -                 | -                 |
| Frontal Cortex               | 10     | -        | -                 | -                 | -       | -            | -                 | -                 |
| Caudate/Putamen              | 11     | -        | -                 | -                 | -       | -            | -                 | -                 |
| Septal Nucleus               | 12     | -        | -                 | -                 | -       | -            | -                 | -                 |
| Parietal Cortex              | 13     | -        | -                 | -                 | -       | -            | -                 | -                 |
| Hippocampus                  | 14     | -        | -                 | -                 | -       | -            | -                 | -                 |
| Thalamus                     | 15     | -        | -                 | -                 | -       | -            | -                 | -                 |
| Hypothalamus                 | 16     | -        | -                 | -                 | -       | -            | -                 | -                 |
| Midbrain                     | 17     | -        | -                 | -                 | -       | -            | -                 | -                 |
| Pons                         | 18     | -        | -                 | -                 | -       | -            | -                 | -                 |
| Medulla                      | 19     | -        | -                 | -                 | -       | -            | -                 | -                 |
| Cerebellum                   | 20     | -        | -                 | -                 | -       | -            | -                 | -                 |
| Superficial Nodes (2)        | 21     | 2.98953  | 3.06313           | 0.07360           | 6070    | 6045         | 408.14            | 486.63            |
| Cervical Nodes (2)           | 22     | 2.99467  | 3.00916           | 0.01449           | 1260    | 1235         | 423.54            | 504.99            |
| Thyroid                      | 23     | 3.00453  | 3.02027           | 0.01574           | 5451    | 5426         | 1,713.04          | 2,042.48          |
| Olfactory Epithelium         | 24     | 2.98049  | 3.10398           | 0.12349           | 1208793 | 1208768      | 48,641.20         | 57,995.31         |
| Respiratory Epithelium       | 25     | 3.01665  | 3.02641           | 0.00976           | 4560134 | 4560109      | 2,321,766.19      | 2,768,261.61      |
| Axillary Nodes (2)           | 26     | 2.97613  | 3.02635           | 0.05022           | 295     | 270          | 26.72             | 31.85             |
| Muscle (R, deltoid)          | 27     | 2.98526  | 3.02542           | 0.04016           | 156     | 131          | 16.21             | 19.33             |
| Liver (R, superficial lobe)  | 28     | 2.97671  | 3.03213           | 0.05542           | 193     | 168          | 15.06             | 17.96             |
| Kidney (L, tip)              | 29     | 2.98235  | 3.03944           | 0.05709           | 527     | 502          | 43.70             | 52.10             |
| Lung (R, top lobe)           | 30     | 3.03467  | 3.08843           | 0.05376           | 136     | 111          | 10.26             | 12.23             |
| Trachea (near cut-off)       | 31     | 2.96691  | 2.97983           | 0.01292           | 114     | 89           | 34.23             | 40.81             |
| Esophagus (near cut-off)     | 32     | 2.97752  | 2.99263           | 0.01511           | 389     | 364          | 119.71            | 142.73            |
| Spleen (tip)                 | 33     | 2.99562  | 3.04569           | 0.05007           | 178     | 153          | 15.18             | 18.10             |
| Heart                        | 34     | 2.99046  | 3.03029           | 0.03983           | 129     | 104          | 12.98             | 15.47             |
| Urine (fill to line of tube) | 35     | 2.96763  | 3.28149           | 0.31386           | 13144   | 13119        | 207.71            | 247.65            |
| Spinal Dura                  | 36     | 2.97386  | 2.98957           | 0.01571           | 82      | 57           | 18.03             | 21.50             |
| Lower Cervical Spinal Cord   | 37     | 2.98001  | 3.08615           | 0.10614           | 37      | 12           | 0.56              | 0.67              |
| Thoracic Spinal Cord         | 38     | 2.97987  | 3.06081           | 0.08094           | 94      | 69           | 4.24              | 5.05              |
| Lumbar Spinal Cord           | 39     | 3.04667  | 3.16295           | 0.11628           | 119     | 94           | 4.02              | 4.79              |
| Blood Sample                 | 40     | 2.98521  | 3.24633           | 0.26112           | 3478    | 3453         | 65.71             | 78.35             |
| Drug Standard                | 41     | 2.96774  | 2.97025           | 0.00251           | 3937667 | 3937642      | 7,795,708.37      | 9,294,889.50      |
| Drug Standard                | 42     | 3.03959  | 3.04223           | 0.00264           | 3795240 | 3795215      | 7,143,738.26      | 8,517,539.99      |
| Drug Standard                | 43     | 2.97394  | 2.97646           | 0.00252           | 4007175 | 4007150      | 7,901,838.26      | 9,421,429.07      |
|                              |        |          |                   |                   |         |              | 0.201<br>cpm/fmol | 0.169<br>cpm/fmol |

| Auto Calculations                                        | Enter Values                        |
|----------------------------------------------------------|-------------------------------------|
| Total uL of Dose Sol = 65.4                              | Oxytocin Molecular Weight = 1,007   |
| Hot mg = 0.0000                                          | Date of Synthesis = 10/23/07        |
| Cold mg = 0.5089                                         | Hot uCi/uL at Synthesis = 2.320     |
| Total mg in Dose Sol = 0.5090                            | Hot uCi/ug at Synthesis = 1985.72   |
| Conc Of Dose Sol (ug/uL) = 7.7843                        | Cold ug/uL = 15.00                  |
| Days after Synthesis Delivered = 21                      | Desired uCi = 45.0                  |
| Decay on Day Delivered = 0.7846                          | Desired mg = 0.400                  |
| Total uCi in Dose Sol on Day Delivered = 57.26           | Estimated Desired nmol = 397.1      |
| uCi/uL in Dose Sol on Day Delivered = 0.8757             | <b>Date of Delivery = 11/13/07</b>  |
| mg delivered = 0.400                                     | <b>uL delivered (actual) = 51.4</b> |
| uCi delivered = 45.00                                    | <b>Date of Counting = 11/13/07</b>  |
| Estimated nmol delivered = 397.18                        | <b>Dose Calculator</b>              |
| Days after Synthesis Counted = 21                        | uL Hot to Deliver = 24.72           |
| Decay on Day Counted = 0.7846                            | uL Cold to Deliver = 26.66          |
| Specific Activity from Amersham Specs (cpm/fmol) = 0.201 | Total uL to Deliver = 51.39         |
| Avg. Volume of Standard (uL)* = 3.0                      | Hot to Cold Ratio = 0.93            |
| Avg. CPM-bkgd of Standard = 3,913,336                    | Total uL to Make = 65.39            |
| Specific Activity from Standards: (CPM/fmol) = 0.169     | Dose Solution uL Hot = 31.46        |
| Date of Disposal from Decay Storage = 06/14/09           | Dose Solution uL Cold = 33.93       |

**Table B11: Intranasal Oxytocin with 1% Mucoadhesive Rat 32 Data**

| Oxytocin Rat 32<br>1% Mucoadhesive | Route | Compound | Volume (uL) | uCi   | mg    | Time (min) | Perfused @ (min) |
|------------------------------------|-------|----------|-------------|-------|-------|------------|------------------|
| Amount Delivered:                  | IN    | Oxytocin | 47          | 45.00 | 0.400 | 14:00      | 30:39            |

| Tissue Description           | Tube # | Tube (g) | Tissue + Tube (g) | Tissue Weight (g) | CPM     | CPM -25 bkgd | nM (Spec. Act.)   | nM (Stan.)        |
|------------------------------|--------|----------|-------------------|-------------------|---------|--------------|-------------------|-------------------|
| Dorsal Dura                  | 1      | 2.98140  | 2.99434           | 0.01294           | 1162    | 1137         | 436.64            | 547.86            |
| Ventral Dura                 | 2      | 2.99921  | 3.01666           | 0.01745           | 1444    | 1419         | 404.09            | 507.02            |
| Trigeminal Ganglion          | 3      | 2.99223  | 3.01334           | 0.02111           | 193     | 168          | 39.55             | 49.62             |
| Maxillary Nerve              | 4      | 2.98786  | 3.00124           | 0.01338           | 323     | 298          | 110.68            | 138.87            |
| Ophthalmic Nerve             | 5      | 3.01659  | 3.02055           | 0.00396           | 98      | 73           | 91.61             | 114.94            |
| Mandibular Nerve             | 6      | 3.00759  | 3.01181           | 0.00422           | 104     | 79           | 93.03             | 116.72            |
| Upper Cervical Spinal Cord   | 7      | 2.98493  | 3.02991           | 0.04498           | 86      | 61           | 6.74              | 8.46              |
| Olfactory Bulbs              | 8      | 2.99195  | 3.05247           | 0.06052           | 1241    | 1216         | 99.85             | 125.28            |
| Anterior Olfactory Nucleus   | 9      | 2.99694  | 3.03363           | 0.03669           | 246     | 221          | 29.93             | 37.56             |
| Frontal Cortex               | 10     | 2.98358  | 3.01961           | 0.03603           | 175     | 150          | 20.69             | 25.96             |
| Caudate/Putamen              | 11     | 2.99463  | 3.00686           | 0.01223           | 302     | 277          | 112.55            | 141.22            |
| Septal Nucleus               | 12     | 3.05574  | 3.06556           | 0.00982           | 75      | 50           | 25.30             | 31.75             |
| Parietal Cortex              | 13     | 3.01511  | 3.04389           | 0.02878           | 166     | 141          | 24.35             | 30.55             |
| Hippocampus                  | 14     | 2.99458  | 3.02413           | 0.02955           | 188     | 163          | 27.41             | 34.39             |
| Thalamus                     | 15     | 3.01629  | 3.07321           | 0.05692           | 133     | 108          | 9.43              | 11.83             |
| Hypothalamus                 | 16     | 3.01405  | 3.03970           | 0.02565           | 304     | 279          | 54.05             | 67.82             |
| Midbrain                     | 17     | 3.00673  | 3.10521           | 0.09848           | 149     | 124          | 6.26              | 7.85              |
| Pons                         | 18     | 2.98752  | 3.06113           | 0.07361           | 604     | 579          | 39.09             | 49.04             |
| Medulla                      | 19     | 2.98559  | 3.08690           | 0.10131           | 164     | 139          | 6.82              | 8.55              |
| Cerebellum                   | 20     | 2.99139  | 3.24645           | 0.25506           | 572     | 547          | 10.66             | 13.37             |
| Superficial Nodes (2)        | 21     | 2.99174  | 3.09267           | 0.10093           | 3576    | 3551         | 174.83            | 219.37            |
| Cervical Nodes (2)           | 22     | 3.06062  | 3.07226           | 0.01164           | 415     | 390          | 166.50            | 208.91            |
| Thyroid                      | 23     | 3.06897  | 3.08569           | 0.01672           | 1744    | 1719         | 510.90            | 641.03            |
| Olfactory Epithelium         | 24     | 3.00586  | 3.08656           | 0.08070           | 58343   | 58318        | 3,591.06          | 4,505.79          |
| Respiratory Epithelium       | 25     | 2.98080  | 3.04637           | 0.06557           | 7154403 | 7154378      | 542,200.33        | 680,312.55        |
| Axillary Nodes (2)           | 26     | 3.00653  | 3.05036           | 0.04383           | 107     | 82           | 9.30              | 11.66             |
| Muscle (R, deltoid)          | 27     | 3.03538  | 3.07878           | 0.04340           | 523     | 498          | 57.02             | 71.55             |
| Liver (R, superficial lobe)  | 28     | 2.98626  | 3.04440           | 0.05814           | 88      | 63           | 5.38              | 6.76              |
| Kidney (L, tip)              | 29     | 2.96606  | 3.01908           | 0.05302           | 527     | 502          | 47.05             | 59.03             |
| Lung (R, top lobe)           | 30     | 2.98851  | 3.02575           | 0.03724           | 243     | 218          | 29.09             | 36.50             |
| Trachea (near cut-off)       | 31     | 2.98391  | 3.00066           | 0.01675           | 114     | 89           | 26.40             | 33.13             |
| Esophagus (near cut-off)     | 32     | 2.96585  | 2.98490           | 0.01905           | 93      | 68           | 17.74             | 22.26             |
| Spleen (tip)                 | 33     | 2.98258  | 3.03913           | 0.05655           | 147     | 122          | 10.72             | 13.45             |
| Heart                        | 34     | 2.98192  | 3.03410           | 0.05218           | 132     | 107          | 10.19             | 12.79             |
| Urine (fill to line of tube) | 35     | 2.98799  | 3.37290           | 0.38491           | 1463    | 1438         | 18.56             | 23.29             |
| Spinal Dura                  | 36     | 2.98815  | 3.01138           | 0.02323           | 56      | 31           | 6.63              | 8.32              |
| Lower Cervical Spinal Cord   | 37     | 2.97841  | 3.09490           | 0.11649           | 93      | 68           | 2.90              | 3.64              |
| Thoracic Spinal Cord         | 38     | 2.98476  | 3.06146           | 0.07670           | 74      | 49           | 3.17              | 3.98              |
| Lumbar Spinal Cord           | 39     | 2.97759  | 3.09640           | 0.11881           | 95      | 70           | 2.93              | 3.67              |
| Blood Sample                 | 40     | 2.98162  | 3.26976           | 0.28814           | 2707    | 2682         | 46.25             | 58.04             |
| Drug Standard                | 41     | 2.97953  | 2.98253           | 0.00300           | 3980289 | 3980264      | 6,593,009.49      | 8,272,416.83      |
| Drug Standard                | 42     | 2.99150  | 2.99441           | 0.00291           | 3995730 | 3995705      | 6,823,284.90      | 8,561,349.25      |
| Drug Standard                | 43     | 3.04040  | 3.04297           | 0.00257           | 4104461 | 4104436      | 7,936,215.32      | 9,957,771.37      |
|                              |        |          |                   |                   |         |              | 0.201<br>cpm/fmol | 0.160<br>cpm/fmol |

| Auto Calculations                                        | Enter Values                        |
|----------------------------------------------------------|-------------------------------------|
| Total uL of Dose Sol = 61.5                              | Oxytocin Molecular Weight = 1,007   |
| Hot mg = 0.0000                                          | Date of Synthesis = 11/13/07        |
| Cold mg = 0.5180                                         | Hot uCi/uL at Synthesis = 2,320     |
| Total mg in Dose Sol = 0.5180                            | Hot uCi/ug at Synthesis = 1985.72   |
| Conc Of Dose Sol (ug/uL) = 8.4293                        | Cold ug/uL = 15.00                  |
| Days after Synthesis Delivered = 6                       | Desired uCi = 45.0                  |
| Decay on Day Delivered = 0.9330                          | Desired mg = 0.400                  |
| Total uCi in Dose Sol on Day Delivered = 58.28           | Estimated Desired nmol = 397.1      |
| uCi/uL in Dose Sol on Day Delivered = 0.9483             | <b>Date of Delivery = 11/19/07</b>  |
| mg delivered = 0.400                                     | <b>uL delivered (actual) = 47.5</b> |
| uCi delivered = 45.00                                    | <b>Date of Counting = 11/19/07</b>  |
| Estimated nmol delivered = 397.12                        | <b>Dose Calculator</b>              |
| Days after Synthesis Counted = 6                         | uL Hot to Deliver = 20.79           |
| Decay on Day Counted = 0.9330                            | uL Cold to Deliver = 26.67          |
| Specific Activity from Amersham Specs (cpm/fmol) = 0.201 | Total uL to Deliver = 47.45         |
| Avg. Volume of Standard (uL)* = 3.0                      | Hot to Cold Ratio = 0.78            |
| Avg. CPM-bkgd of Standard = 4,026,802                    | Total uL to Make = 61.45            |
| Specific Activity from Standards: (CPM/fmol) = 0.160     | Dose Solution uL Hot = 26.92        |
| Date of Disposal from Decay Storage = 07/05/09           | Dose Solution uL Cold = 34.53       |

**Table B12: Intranasal Oxytocin with 1% Mucoadhesive Rat 33 Data**

| Oxytocin Rat 33<br>1% Mucoadhesive | Route | Compound | Volume (uL) | uCi   | mg    | Time (min) | Perfused @ (min) |
|------------------------------------|-------|----------|-------------|-------|-------|------------|------------------|
| Amount Delivered:                  | IN    | Oxytocin | 47          | 45.00 | 0.400 | 14:00      | 31:07            |

| Tissue Description           | Tube # | Tube (g) | Tissue + Tube (g) | Tissue Weight (g) | CPM      | CPM -25 bkgd | nM (Spec. Act.)   | nM (Stan.)        |
|------------------------------|--------|----------|-------------------|-------------------|----------|--------------|-------------------|-------------------|
| Dorsal Dura                  | 1      | 3.00538  | 3.01932           | 0.01394           | 1778     | 1753         | 624.90            | 784.08            |
| Ventral Dura                 | 2      | 3.00813  | 3.02480           | 0.01667           | 4618     | 4593         | 1,369.16          | 1,717.92          |
| Trigeminal Ganglion          | 3      | 2.99480  | 3.01928           | 0.02448           | 334      | 309          | 62.72             | 78.70             |
| Maxillary Nerve              | 4      | 2.97678  | 2.99211           | 0.01533           | 851      | 826          | 267.75            | 335.95            |
| Ophthalmic Nerve             | 5      | 2.98739  | 2.99155           | 0.00416           | 539      | 514          | 613.99            | 770.39            |
| Mandibular Nerve             | 6      | 3.00820  | 3.01339           | 0.00519           | 124      | 99           | 94.79             | 118.94            |
| Upper Cervical Spinal Cord   | 7      | 3.00643  | 3.06130           | 0.05487           | 865      | 840          | 76.07             | 95.45             |
| Olfactory Bulbs              | 8      | 3.00319  | 3.07517           | 0.07198           | 724      | 699          | 48.26             | 60.55             |
| Anterior Olfactory Nucleus   | 9      | 2.98669  | 3.02610           | 0.03941           | 511      | 486          | 61.28             | 76.89             |
| Frontal Cortex               | 10     | 2.99531  | 3.03571           | 0.04040           | 427      | 402          | 49.45             | 62.04             |
| Caudate/Putamen              | 11     | 3.00881  | 3.02202           | 0.01321           | 96       | 71           | 26.71             | 33.51             |
| Septal Nucleus               | 12     | 2.99894  | 3.00814           | 0.00920           | 59       | 34           | 18.36             | 23.04             |
| Parietal Cortex              | 13     | 3.06349  | 3.09926           | 0.03577           | 184      | 159          | 22.09             | 27.72             |
| Hippocampus                  | 14     | 3.00703  | 3.03995           | 0.03292           | 91       | 66           | 9.96              | 12.50             |
| Thalamus                     | 15     | 3.01978  | 3.09224           | 0.07246           | 77       | 52           | 3.57              | 4.47              |
| Hypothalamus                 | 16     | 3.06433  | 3.09308           | 0.02875           | 91       | 66           | 11.41             | 14.31             |
| Midbrain                     | 17     | 3.01972  | 3.12973           | 0.11001           | 152      | 127          | 5.74              | 7.20              |
| Pons                         | 18     | 2.99868  | 3.06969           | 0.07101           | 163      | 138          | 9.66              | 12.12             |
| Medulla                      | 19     | 2.97709  | 3.07573           | 0.09864           | 217      | 192          | 9.67              | 12.14             |
| Cerebellum                   | 20     | 3.00362  | 3.24110           | 0.23748           | 338      | 313          | 6.55              | 8.22              |
| Superficial Nodes (2)        | 21     | 3.01763  | 3.09494           | 0.07731           | 5204     | 5179         | 332.89            | 417.69            |
| Cervical Nodes (2)           | 22     | 2.98837  | 3.00407           | 0.01570           | 353      | 328          | 103.82            | 130.26            |
| Thyroid                      | 23     | 2.99321  | 3.01388           | 0.02067           | 2397     | 2372         | 570.25            | 715.51            |
| Olfactory Epithelium         | 24     | 3.02065  | 3.14685           | 0.12620           | 32668    | 32643        | 1,285.36          | 1,612.77          |
| Respiratory Epithelium       | 25     | 3.00032  | 3.09121           | 0.09089           | 12497854 | 12497829     | 683,300.21        | 857,354.52        |
| Axillary Nodes (2)           | 26     | 3.03498  | 3.07488           | 0.03990           | 237      | 212          | 26.40             | 33.13             |
| Muscle (R, deltoid)          | 27     | 2.96142  | 3.00230           | 0.04088           | 105      | 80           | 9.72              | 12.20             |
| Liver (R, superficial lobe)  | 28     | 2.98093  | 3.04439           | 0.06346           | 154      | 129          | 10.10             | 12.67             |
| Kidney (L, tip)              | 29     | 3.03978  | 3.08466           | 0.04488           | 349      | 324          | 35.87             | 45.01             |
| Lung (R, top lobe)           | 30     | 3.04565  | 3.09363           | 0.04798           | 202      | 177          | 18.33             | 23.00             |
| Trachea (near cut-off)       | 31     | 3.04455  | 3.06165           | 0.01710           | 86       | 61           | 17.73             | 22.24             |
| Esophagus (near cut-off)     | 32     | 2.97725  | 2.99681           | 0.01956           | 116      | 91           | 23.12             | 29.01             |
| Spleen (tip)                 | 33     | 2.97612  | 3.02913           | 0.05301           | 206      | 181          | 16.97             | 21.29             |
| Heart                        | 34     | 2.96575  | 3.01605           | 0.05030           | 154      | 129          | 12.74             | 15.99             |
| Urine (fill to line of tube) | 35     | 3.03774  | 3.25998           | 0.22224           | 2945     | 2920         | 65.29             | 81.92             |
| Spinal Dura                  | 36     | 2.98318  | 2.99772           | 0.01454           | 51       | 26           | 8.89              | 11.15             |
| Lower Cervical Spinal Cord   | 37     | 2.98680  | 3.13204           | 0.14524           | 133      | 108          | 3.70              | 4.64              |
| Thoracic Spinal Cord         | 38     | 2.96289  | 3.04897           | 0.08608           | 89       | 64           | 3.69              | 4.64              |
| Lumbar Spinal Cord           | 39     | 2.99087  | 3.11939           | 0.12852           | 105      | 80           | 3.09              | 3.88              |
| Blood Sample                 | 40     | 3.00163  | 3.26652           | 0.26489           | 2696     | 2671         | 50.11             | 62.87             |
| Drug Standard                | 41     | 2.97953  | 2.98253           | 0.00300           | 3999599  | 3999574      | 6,624,995.06      | 8,312,553.38      |
| Drug Standard                | 42     | 2.99150  | 2.99441           | 0.00291           | 3983176  | 3983151      | 6,801,847.00      | 8,534,454.10      |
| Drug Standard                | 43     | 3.04040  | 3.04297           | 0.00257           | 4097700  | 4097675      | 7,923,142.45      | 9,941,372.62      |
|                              |        |          |                   |                   |          |              | 0.201<br>cpm/fmol | 0.160<br>cpm/fmol |

| Auto Calculations                                        | Enter Values                        |
|----------------------------------------------------------|-------------------------------------|
| Total uL of Dose Sol = 61.5                              | Oxytocin Molecular Weight = 1,007   |
| Hot mg = 0.0000                                          | Date of Synthesis = 11/13/07        |
| Cold mg = 0.5180                                         | Hot uCi/uL at Synthesis = 2.320     |
| Total mg in Dose Sol = 0.5180                            | Hot uCi/ug at Synthesis = 1985.72   |
| Conc Of Dose Sol (ug/uL) = 8.4293                        | Cold ug/uL = 15.00                  |
| Days after Synthesis Delivered = 6                       | Desired uCi = 45.0                  |
| Decay on Day Delivered = 0.9330                          | Desired mg = 0.400                  |
| Total uCi in Dose Sol on Day Delivered = 58.28           | Estimated Desired nmol = 397.1      |
| uCi/uL in Dose Sol on Day Delivered = 0.9483             | <b>Date of Delivery = 11/19/07</b>  |
| mg delivered = 0.400                                     | <b>uL delivered (actual) = 47.5</b> |
| uCi delivered = 45.00                                    | <b>Date of Counting = 11/19/07</b>  |
| Estimated nmol delivered = 397.12                        | <b>Dose Calculator</b>              |
| Days after Synthesis Counted = 6                         | uL Hot to Deliver = 20.79           |
| Decay on Day Counted = 0.9330                            | uL Cold to Deliver = 26.67          |
| Specific Activity from Amersham Specs (cpm/fmol) = 0.201 | Total uL to Deliver = 47.45         |
| Avg. Volume of Standard (uL)* = 3.0                      | Hot to Cold Ratio = 0.78            |
| Avg. CPM-bkgd of Standard = 4,026,800                    | Total uL to Make = 61.45            |
| Specific Activity from Standards: (CPM/fmol) = 0.160     | Dose Solution uL Hot = 26.92        |
| Date of Disposal from Decay Storage = 07/05/09           | Dose Solution uL Cold = 34.53       |

**Table B13: Intranasal Oxytocin with 1% Mucoadhesive Rat 34 Data**

| Oxytocin Rat 34<br>1% Mucoadhesive | Route | Com-pound | Volume<br>(uL) | uCi   | mg    | Time (min) | Perfused @ (min) |
|------------------------------------|-------|-----------|----------------|-------|-------|------------|------------------|
| Amount Delivered:                  | IN    | Oxytocin  | 48             | 45.00 | 0.400 | 14:00      | 30:20            |

| Tissue Description           | Tube # | Tube (g) | Tissue +<br>Tube (g) | Tissue<br>Weight (g) | CPM     | CPM -25<br>bkgd | nM<br>(Spec. Act.) | nM (Stan.)        |
|------------------------------|--------|----------|----------------------|----------------------|---------|-----------------|--------------------|-------------------|
| Dorsal Dura                  | 1      | 2.99846  | 3.01147              | 0.01301              | 8968    | 8943            | 3,415.85           | 4,251.65          |
| Ventral Dura                 | 2      | 3.00325  | 3.01560              | 0.01235              | 5633    | 5608            | 2,256.49           | 2,808.62          |
| Trigeminal Ganglion          | 3      | -        | -                    | -                    | -       | -               | -                  | -                 |
| Maxillary Nerve              | 4      | 3.01262  | 3.02524              | 0.01262              | 1727    | 1702            | 670.18             | 834.17            |
| Ophthalmic Nerve             | 5      | 2.99920  | 3.00142              | 0.00222              | 224     | 199             | 445.44             | 554.44            |
| Mandibular Nerve             | 6      | 3.00827  | 3.01000              | 0.00173              | 349     | 324             | 930.66             | 1,158.38          |
| Upper Cervical Spinal Cord   | 7      | -        | -                    | -                    | -       | -               | -                  | -                 |
| Olfactory Bulbs              | 8      | -        | -                    | -                    | -       | -               | -                  | -                 |
| Anterior Olfactory Nucleus   | 9      | -        | -                    | -                    | -       | -               | -                  | -                 |
| Frontal Cortex               | 10     | -        | -                    | -                    | -       | -               | -                  | -                 |
| Caudate/Putamen              | 11     | -        | -                    | -                    | -       | -               | -                  | -                 |
| Septal Nucleus               | 12     | -        | -                    | -                    | -       | -               | -                  | -                 |
| Parietal Cortex              | 13     | -        | -                    | -                    | -       | -               | -                  | -                 |
| Hippocampus                  | 14     | -        | -                    | -                    | -       | -               | -                  | -                 |
| Thalamus                     | 15     | -        | -                    | -                    | -       | -               | -                  | -                 |
| Hypothalamus                 | 16     | -        | -                    | -                    | -       | -               | -                  | -                 |
| Midbrain                     | 17     | -        | -                    | -                    | -       | -               | -                  | -                 |
| Pons                         | 18     | -        | -                    | -                    | -       | -               | -                  | -                 |
| Medulla                      | 19     | -        | -                    | -                    | -       | -               | -                  | -                 |
| Cerebellum                   | 20     | -        | -                    | -                    | -       | -               | -                  | -                 |
| Superficial Nodes (2)        | 21     | 3.06700  | 3.15850              | 0.09150              | 12879   | 12854           | 698.09             | 868.90            |
| Cervical Nodes (2)           | 22     | 2.99211  | 3.00128              | 0.00917              | 354     | 329             | 178.29             | 221.91            |
| Thyroid                      | 23     | 3.00391  | 3.02240              | 0.01849              | 3141    | 3116            | 837.44             | 1,042.35          |
| Olfactory Epithelium         | 24     | 3.00238  | 3.14457              | 0.14219              | 178789  | 178764          | 6,247.47           | 7,776.12          |
| Respiratory Epithelium       | 25     | 2.98110  | 3.06518              | 0.08408              | 4178345 | 4178320         | 246,946.04         | 307,369.51        |
| Axillary Nodes (2)           | 26     | 3.03911  | 3.08249              | 0.04338              | 149     | 124             | 14.20              | 17.68             |
| Muscle (R, deltoid)          | 27     | 2.98889  | 3.03923              | 0.05034              | 168     | 143             | 14.12              | 17.57             |
| Liver (R, superficial lobe)  | 28     | 3.04488  | 3.12686              | 0.08198              | 163     | 138             | 8.36               | 10.41             |
| Kidney (L, tip)              | 29     | 2.97869  | 3.02524              | 0.04655              | 335     | 310             | 33.09              | 41.19             |
| Lung (R, top lobe)           | 30     | 2.96596  | 3.01999              | 0.05403              | 160     | 135             | 12.42              | 15.45             |
| Trachea (near cut-off)       | 31     | 2.98687  | 3.00190              | 0.01503              | 89      | 64              | 21.16              | 26.34             |
| Esophagus (near cut-off)     | 32     | 3.04184  | 3.05697              | 0.01513              | 113     | 88              | 28.90              | 35.97             |
| Spleen (tip)                 | 33     | 2.98758  | 3.05178              | 0.06420              | 175     | 150             | 11.61              | 14.45             |
| Heart                        | 34     | 2.99410  | 3.05546              | 0.06136              | 139     | 114             | 9.23               | 11.49             |
| Urine (fill to line of tube) | 35     | 2.98924  | 3.18432              | 0.19508              | 2831    | 2806            | 71.48              | 88.97             |
| Spinal Dura                  | 36     | 2.98525  | 3.00954              | 0.02429              | 85      | 60              | 12.27              | 15.28             |
| Lower Cervical Spinal Cord   | 37     | 2.99144  | 3.09404              | 0.10260              | 97      | 72              | 3.49               | 4.34              |
| Thoracic Spinal Cord         | 38     | 2.97610  | 3.05921              | 0.08311              | 100     | 75              | 4.48               | 5.58              |
| Lumbar Spinal Cord           | 39     | 2.97351  | 3.09962              | 0.12611              | 114     | 89              | 3.51               | 4.37              |
| Blood Sample                 | 40     | 3.00250  | 3.24830              | 0.24580              | 2306    | 2281            | 46.11              | 57.40             |
| Drug Standard                | 41     | 3.04708  | 3.04973              | 0.00265              | 3981332 | 3981307         | 7,465,740.16       | 9,292,478.79      |
| Drug Standard                | 42     | 2.98753  | 2.99028              | 0.00275              | 4118626 | 4118601         | 7,442,350.24       | 9,263,365.75      |
| Drug Standard                | 43     | 2.97967  | 2.98271              | 0.00304              | 4016335 | 4016310         | 6,565,181.25       | 8,171,568.55      |
|                              |        |          |                      |                      |         |                 | 0.201<br>cpm/fmol  | 0.162<br>cpm/fmol |

| Auto Calculations                                        | Enter Values                      |
|----------------------------------------------------------|-----------------------------------|
| Total uL of Dose Sol = 61.7                              | Oxytocin Molecular Weight = 1,007 |
| Hot mg = 0.0000                                          | Date of Synthesis = 11/13/07      |
| Cold mg = 0.5174                                         | Hot uCi/uL at Synthesis = 2.320   |
| Total mg in Dose Sol = 0.5174                            | Hot uCi/ug at Synthesis = 1985.72 |
| Conc Of Dose Sol (ug/uL) = 8.3866                        | Cold ug/uL = 15.00                |
| Days after Synthesis Delivered = 7                       | Desired uCi = 45.0                |
| Decay on Day Delivered = 0.9223                          | Desired mg = 0.400                |
| Total uCi in Dose Sol on Day Delivered = 58.21           | Estimated Desired nmol = 397.1    |
| uCi/uL in Dose Sol on Day Delivered = 0.9435             | Date of Delivery = 11/20/07       |
| mg delivered = 0.400                                     | uL delivered (actual) = 47.7      |
| uCi delivered = 45.00                                    | Date of Counting = 11/20/07       |
| Estimated nmol delivered = 397.10                        | <b>Dose Calculator</b>            |
| Days after Synthesis Counted = 7                         | uL Hot to Deliver = 21.03         |
| Decay on Day Counted = 0.9223                            | uL Cold to Deliver = 26.67        |
| Specific Activity from Amersham Specs (cpm/fmol) = 0.201 | Total uL to Deliver = 47.69       |
| Avg. Volume of Standard (uL)* = 3.0                      | Hot to Cold Ratio = 0.79          |
| Avg. CPM-bkgd of Standard = 4,038,739                    | Total uL to Make = 61.69          |
| Specific Activity from Standards: (CPM/fmol) = 0.162     | Dose Solution uL Hot = 27.20      |
| Date of Disposal from Decay Storage = 07/05/09           | Dose Solution uL Cold = 34.49     |

**Table B14: Intranasal Oxytocin with 1% Mucoadhesive Rat 35 Data**

| Oxytocin Rat 35<br>1% Mucoadhesive | Route | Compound | Volume (uL) | uCi   | mg    | Time (min) | Perfused @ (min) |
|------------------------------------|-------|----------|-------------|-------|-------|------------|------------------|
| Amount Delivered:                  | IN    | Oxytocin | 48          | 45.00 | 0.400 | 14:00      | 30:49            |

| Tissue Description           | Tube # | Tube (g) | Tissue + Tube (g) | Tissue Weight (g) | CPM     | CPM -25 bkgd | nM (Spec. Act.)   | nM (Stan.)        |
|------------------------------|--------|----------|-------------------|-------------------|---------|--------------|-------------------|-------------------|
| Dorsal Dura                  | 1      | 3.01558  | 3.02946           | 0.01388           | 144     | 119          | 42.60             | 53.03             |
| Ventral Dura                 | 2      | 3.05953  | 3.06744           | 0.00791           | 106     | 81           | 50.89             | 63.34             |
| Trigeminal Ganglion          | 3      | -        | -                 | -                 | -       | -            | -                 | -                 |
| Maxillary Nerve              | 4      | 2.98315  | 2.99421           | 0.01106           | 579     | 554          | 248.91            | 309.82            |
| Ophthalmic Nerve             | 5      | 3.00322  | 3.00597           | 0.00275           | 46      | 21           | 37.95             | 47.23             |
| Mandibular Nerve             | 6      | 3.01085  | 3.01444           | 0.00359           | 95      | 70           | 96.89             | 120.60            |
| Upper Cervical Spinal Cord   | 7      | -        | -                 | -                 | -       | -            | -                 | -                 |
| Olfactory Bulbs              | 8      | -        | -                 | -                 | -       | -            | -                 | -                 |
| Anterior Olfactory Nucleus   | 9      | -        | -                 | -                 | -       | -            | -                 | -                 |
| Frontal Cortex               | 10     | -        | -                 | -                 | -       | -            | -                 | -                 |
| Caudate/Putamen              | 11     | -        | -                 | -                 | -       | -            | -                 | -                 |
| Septal Nucleus               | 12     | -        | -                 | -                 | -       | -            | -                 | -                 |
| Parietal Cortex              | 13     | -        | -                 | -                 | -       | -            | -                 | -                 |
| Hippocampus                  | 14     | -        | -                 | -                 | -       | -            | -                 | -                 |
| Thalamus                     | 15     | -        | -                 | -                 | -       | -            | -                 | -                 |
| Hypothalamus                 | 16     | -        | -                 | -                 | -       | -            | -                 | -                 |
| Midbrain                     | 17     | -        | -                 | -                 | -       | -            | -                 | -                 |
| Pons                         | 18     | -        | -                 | -                 | -       | -            | -                 | -                 |
| Medulla                      | 19     | -        | -                 | -                 | -       | -            | -                 | -                 |
| Cerebellum                   | 20     | -        | -                 | -                 | -       | -            | -                 | -                 |
| Superficial Nodes (2)        | 21     | 3.01269  | 3.08798           | 0.07529           | 1451    | 1426         | 94.12             | 117.15            |
| Cervical Nodes (2)           | 22     | 3.00681  | 3.01806           | 0.01125           | 1585    | 1560         | 689.07            | 857.68            |
| Thyroid                      | 23     | 3.01385  | 3.04430           | 0.03045           | 3218    | 3193         | 521.08            | 648.58            |
| Olfactory Epithelium         | 24     | 2.99543  | 3.09444           | 0.09901           | 63068   | 63043        | 3,164.11          | 3,938.31          |
| Respiratory Epithelium       | 25     | 3.01308  | 3.07297           | 0.05989           | 9938295 | 9938270      | 824,611.82        | 1,026,380.20      |
| Axillary Nodes (2)           | 26     | 3.00578  | 3.05031           | 0.04453           | 890     | 865          | 96.53             | 120.15            |
| Muscle (R, deltoid)          | 27     | 2.96694  | 3.01842           | 0.05148           | 479     | 454          | 43.82             | 54.55             |
| Liver (R, superficial lobe)  | 28     | 2.96769  | 3.00431           | 0.03662           | 90      | 65           | 8.82              | 10.98             |
| Kidney (L, tip)              | 29     | 2.97653  | 3.03738           | 0.06085           | 733     | 708          | 57.82             | 71.97             |
| Lung (R, top lobe)           | 30     | 2.99323  | 3.02963           | 0.03640           | 150     | 125          | 17.06             | 21.24             |
| Trachea (near cut-off)       | 31     | 2.97837  | 2.99587           | 0.01750           | 92      | 67           | 19.03             | 23.68             |
| Esophagus (near cut-off)     | 32     | 2.98391  | 3.00135           | 0.01744           | 81      | 56           | 15.96             | 19.86             |
| Spleen (tip)                 | 33     | 2.97994  | 3.05495           | 0.07501           | 210     | 185          | 12.26             | 15.25             |
| Heart                        | 34     | 3.00075  | 3.06878           | 0.06803           | 265     | 240          | 17.53             | 21.82             |
| Urine (fill to line of tube) | 35     | 2.98130  | 3.17415           | 0.19285           | 288     | 263          | 6.78              | 8.44              |
| Spinal Dura                  | 36     | 2.98065  | 2.99500           | 0.01435           | 68      | 43           | 14.89             | 18.53             |
| Lower Cervical Spinal Cord   | 37     | 2.97853  | 3.11622           | 0.13769           | 146     | 121          | 4.37              | 5.44              |
| Thoracic Spinal Cord         | 38     | 2.97308  | 3.04444           | 0.07136           | 97      | 72           | 5.01              | 6.24              |
| Lumbar Spinal Cord           | 39     | 3.00619  | 3.12719           | 0.12100           | 206     | 181          | 7.43              | 9.25              |
| Blood Sample                 | 40     | 2.99064  | 3.22288           | 0.23224           | 2771    | 2746         | 58.76             | 73.13             |
| Drug Standard                | 41     | 3.04708  | 3.04973           | 0.00265           | 3981332 | 3981307      | 7,465,740.16      | 9,292,478.79      |
| Drug Standard                | 42     | 2.98753  | 2.99028           | 0.00275           | 4118626 | 4118601      | 7,442,350.24      | 9,263,365.75      |
| Drug Standard                | 43     | 2.97967  | 2.98271           | 0.00304           | 4016335 | 4016310      | 6,565,181.25      | 8,171,568.55      |
|                              |        |          |                   |                   |         |              | 0.201<br>cpm/fmol | 0.162<br>cpm/fmol |

| Auto Calculations                                        | Enter Values                      |
|----------------------------------------------------------|-----------------------------------|
| Total uL of Dose Sol = 61.7                              | Oxytocin Molecular Weight = 1,007 |
| Hot mg = 0.0000                                          | Date of Synthesis = 11/13/07      |
| Cold mg = 0.5174                                         | Hot uCi/uL at Synthesis = 2.320   |
| Total mg in Dose Sol = 0.5174                            | Hot uCi/ug at Synthesis = 1985.72 |
| Conc Of Dose Sol (ug/uL) = 8.3866                        | Cold ug/uL = 15.00                |
| Days after Synthesis Delivered = 7                       | Desired uCi = 45.0                |
| Decay on Day Delivered = 0.9223                          | Desired mg = 0.400                |
| Total uCi in Dose Sol on Day Delivered = 58.21           | Estimated Desired nmol = 397.1    |
| uCi/uL in Dose Sol on Day Delivered = 0.9435             | Date of Delivery = 11/20/07       |
| mg delivered = 0.400                                     | uL delivered (actual) = 47.7      |
| uCi delivered = 45.000                                   | Date of Counting = 11/20/07       |
| Estimated nmol delivered = 397.10                        | Dose Calculator                   |
| Days after Synthesis Counted = 7                         | uL Hot to Deliver = 21.03         |
| Decay on Day Counted = 0.9223                            | uL Cold to Deliver = 26.67        |
| Specific Activity from Amersham Specs (cpm/fmol) = 0.201 | Total uL to Deliver = 47.69       |
| Avg. Volume of Standard (uL)* = 3.0                      | Hot to Cold Ratio = 0.79          |
| Avg. CPM-bkgd of Standard = 4,038,739                    | Total uL to Make = 61.69          |
| Specific Activity from Standards: (CPM/fmol) = 0.162     | Dose Solution uL Hot = 27.20      |
| Date of Disposal from Decay Storage = 07/05/09           | Dose Solution uL Cold = 34.49     |

**Table B15: Intranasal Oxytocin with 1% Mucoadhesive Rat 36 Data**

| Oxytocin Rat 36<br>1% Mucoadhesive | Route | Com-pound | Volume<br>(uL) | uCi   | mg    | Time (min) | Perfused @ (min) |
|------------------------------------|-------|-----------|----------------|-------|-------|------------|------------------|
| Amount Delivered:                  | IN    | Oxytocin  | 49             | 45.00 | 0.400 | 14:00      | 30:43            |

| Tissue Description           | Tube # | Tube (g) | Tissue +<br>Tube (g) | Tissue<br>Weight (g) | CPM     | CPM -25<br>bkgd | nM<br>(Spec. Act.) | nM (Stan.)        |
|------------------------------|--------|----------|----------------------|----------------------|---------|-----------------|--------------------|-------------------|
| Dorsal Dura                  | 1      | 3.02742  | 3.03508              | 0.00766              | 825     | 800             | 518.98             | 674.86            |
| Ventral Dura                 | 2      | 3.00204  | 3.01004              | 0.00800              | 845     | 820             | 509.35             | 662.34            |
| Trigeminal Ganglion          | 3      | -        | -                    | -                    | -       | -               | -                  | -                 |
| Maxillary Nerve              | 4      | 3.06447  | 3.07230              | 0.00783              | 300     | 275             | 174.53             | 226.95            |
| Ophthalmic Nerve             | 5      | 3.02031  | 3.02319              | 0.00288              | 140     | 115             | 198.43             | 258.02            |
| Mandibular Nerve             | 6      | 3.06660  | 3.06854              | 0.00194              | 359     | 334             | 855.54             | 1,112.50          |
| Upper Cervical Spinal Cord   | 7      | -        | -                    | -                    | -       | -               | -                  | -                 |
| Olfactory Bulbs              | 8      | -        | -                    | -                    | -       | -               | -                  | -                 |
| Anterior Olfactory Nucleus   | 9      | -        | -                    | -                    | -       | -               | -                  | -                 |
| Frontal Cortex               | 10     | -        | -                    | -                    | -       | -               | -                  | -                 |
| Caudate/Putamen              | 11     | -        | -                    | -                    | -       | -               | -                  | -                 |
| Septal Nucleus               | 12     | -        | -                    | -                    | -       | -               | -                  | -                 |
| Parietal Cortex              | 13     | -        | -                    | -                    | -       | -               | -                  | -                 |
| Hippocampus                  | 14     | -        | -                    | -                    | -       | -               | -                  | -                 |
| Thalamus                     | 15     | -        | -                    | -                    | -       | -               | -                  | -                 |
| Hypothalamus                 | 16     | -        | -                    | -                    | -       | -               | -                  | -                 |
| Midbrain                     | 17     | -        | -                    | -                    | -       | -               | -                  | -                 |
| Pons                         | 18     | -        | -                    | -                    | -       | -               | -                  | -                 |
| Medulla                      | 19     | -        | -                    | -                    | -       | -               | -                  | -                 |
| Cerebellum                   | 20     | -        | -                    | -                    | -       | -               | -                  | -                 |
| Superficial Nodes (2)        | 21     | 3.00078  | 3.07344              | 0.07266              | 5558    | 5533            | 378.41             | 492.06            |
| Cervical Nodes (2)           | 22     | 3.01141  | 3.02215              | 0.01074              | 2781    | 2756            | 1,275.17           | 1,658.17          |
| Thyroid                      | 23     | 3.00513  | 3.03585              | 0.03072              | 5295    | 5270            | 852.48             | 1,108.52          |
| Olfactory Epithelium         | 24     | 3.00560  | 3.12757              | 0.12197              | 619498  | 619473          | 25,238.44          | 32,818.88         |
| Respiratory Epithelium       | 25     | 2.99928  | 3.06740              | 0.06812              | 6310676 | 6310651         | 460,354.72         | 598,623.75        |
| Axillary Nodes (2)           | 26     | 3.00020  | 3.03178              | 0.03158              | 117     | 92              | 14.48              | 18.82             |
| Muscle (R, deltoid)          | 27     | 3.03946  | 3.10385              | 0.06439              | 139     | 114             | 8.80               | 11.44             |
| Liver (R, superficial lobe)  | 28     | 2.99742  | 3.05755              | 0.06013              | 77      | 52              | 4.30               | 5.59              |
| Kidney (L, tip)              | 29     | 2.99369  | 3.06099              | 0.06730              | 458     | 433             | 31.97              | 41.57             |
| Lung (R, top lobe)           | 30     | 2.98969  | 3.03693              | 0.04724              | 123     | 98              | 10.31              | 13.41             |
| Trachea (near cut-off)       | 31     | 2.99247  | 3.01022              | 0.01775              | 97      | 72              | 20.16              | 26.21             |
| Esophagus (near cut-off)     | 32     | 3.03445  | 3.05069              | 0.01624              | 84      | 59              | 18.05              | 23.48             |
| Spleen (tip)                 | 33     | 2.97350  | 3.05255              | 0.07905              | 274     | 249             | 15.65              | 20.35             |
| Heart                        | 34     | 2.98088  | 3.03126              | 0.05038              | 131     | 106             | 10.46              | 13.60             |
| Urine (fill to line of tube) | 35     | 2.96644  | 3.20455              | 0.23811              | 1232    | 1207            | 25.19              | 32.76             |
| Spinal Dura                  | 36     | 2.98264  | 2.99503              | 0.01239              | 917     | 892             | 357.76             | 465.21            |
| Lower Cervical Spinal Cord   | 37     | 2.97995  | 3.12040              | 0.14045              | 608     | 583             | 20.63              | 26.82             |
| Thoracic Spinal Cord         | 38     | 2.98019  | 3.07721              | 0.09702              | 101     | 76              | 3.89               | 5.06              |
| Lumbar Spinal Cord           | 39     | 2.96365  | 3.10621              | 0.14256              | 198     | 173             | 6.03               | 7.84              |
| Blood Sample                 | 40     | 3.05308  | 3.34235              | 0.28927              | 3254    | 3229            | 55.47              | 72.13             |
| Drug Standard                | 41     | 2.97304  | 2.97555              | 0.00251              | 3829267 | 3829242         | 7,581,099.02       | 9,858,106.66      |
| Drug Standard                | 42     | 2.97524  | 2.97831              | 0.00307              | 3813167 | 3813142         | 6,172,167.17       | 8,025,997.56      |
| Drug Standard                | 43     | 2.97974  | 2.98220              | 0.00246              | 3599481 | 3599456         | 7,271,011.63       | 9,454,883.51      |
|                              |        |          |                      |                      |         |                 | 0.201<br>cpm/fmol  | 0.155<br>cpm/fmol |

| Auto Calculations                                        | Enter Values                      |
|----------------------------------------------------------|-----------------------------------|
| Total uL of Dose Sol = 63.2                              | Oxytocin Molecular Weight = 1,007 |
| Hot mg = 0.0000                                          | Date of Synthesis = 11/13/07      |
| Cold mg = 0.5138                                         | Hot uCi/uL at Synthesis = 2.320   |
| Total mg in Dose Sol = 0.5138                            | Hot uCi/ug at Synthesis = 1985.72 |
| Conc Of Dose Sol (ug/uL) = 8.1294                        | Cold ug/uL = 15.00                |
| Days after Synthesis Delivered = 13                      | Desired uCi = 45.0                |
| Decay on Day Delivered = 0.8606                          | Desired mg = 0.400                |
| Total uCi in Dose Sol on Day Delivered = 57.80           | Estimated Desired nmol = 397.1    |
| uCi/uL in Dose Sol on Day Delivered = 0.9146             | Date of Delivery = 11/26/07       |
| mg delivered = 0.400                                     | uL delivered (actual) = 49.2      |
| uCi delivered = 45.00                                    | Date of Counting = 11/26/07       |
| Estimated nmol delivered = 397.11                        | Dose Calculator                   |
| Days after Synthesis Counted = 13                        | uL Hot to Deliver = 22.54         |
| Decay on Day Counted = 0.8606                            | uL Cold to Deliver = 26.66        |
| Specific Activity from Amersham Specs (cpm/fmol) = 0.201 | Total uL to Deliver = 49.20       |
| Avg. Volume of Standard (uL)* = 3.0                      | Hot to Cold Ratio = 0.85          |
| Avg. CPM-bkgd of Standard = 3,747,280                    | Total uL to Make = 63.20          |
| Specific Activity from Standards: (CPM/fmol) = 0.155     | Dose Solution uL Hot = 28.95      |
| Date of Disposal from Decay Storage = 07/05/09           | Dose Solution uL Cold = 34.25     |

**Table B16: Intranasal Oxytocin with 1% Mucoadhesive Rat 37 Data**

| Oxytocin Rat 37<br>1% Mucoadhesive | Route | Com-pound | Volume<br>(uL) | uCi   | mg    | Time (min) | Perfused @ (min) |  |
|------------------------------------|-------|-----------|----------------|-------|-------|------------|------------------|--|
| Amount Delivered:                  | IN    | Oxytocin  | 49             | 45.00 | 0.400 | 14:00      | 30:45            |  |

  

| Tissue Description           | Tube # | Tube (g) | Tissue +<br>Tube (g) | Tissue<br>Weight (g) | CPM     | CPM -25<br>bkgd | nM<br>(Spec. Act.) | nM (Stan.)        |
|------------------------------|--------|----------|----------------------|----------------------|---------|-----------------|--------------------|-------------------|
| Dorsal Dura                  | 1      | 3.05923  | 3.06996              | 0.01073              | 202     | 177             | 81.97              | 106.59            |
| Ventral Dura                 | 2      | 3.01586  | 3.03112              | 0.01526              | 154     | 129             | 42.01              | 54.62             |
| Trigeminal Ganglion          | 3      | -        | -                    | -                    | -       | -               | -                  | -                 |
| Maxillary Nerve              | 4      | 2.99890  | 3.00903              | 0.01013              | 196     | 171             | 83.88              | 109.08            |
| Ophthalmic Nerve             | 5      | 2.99481  | 2.99649              | 0.00168              | 72      | 47              | 139.02             | 180.78            |
| Mandibular Nerve             | 6      | 3.00379  | 3.00737              | 0.00358              | 144     | 119             | 165.18             | 214.79            |
| Upper Cervical Spinal Cord   | 7      | -        | -                    | -                    | -       | -               | -                  | -                 |
| Olfactory Bulbs              | 8      | -        | -                    | -                    | -       | -               | -                  | -                 |
| Anterior Olfactory Nucleus   | 9      | -        | -                    | -                    | -       | -               | -                  | -                 |
| Frontal Cortex               | 10     | -        | -                    | -                    | -       | -               | -                  | -                 |
| Caudate/Putamen              | 11     | -        | -                    | -                    | -       | -               | -                  | -                 |
| Septal Nucleus               | 12     | -        | -                    | -                    | -       | -               | -                  | -                 |
| Parietal Cortex              | 13     | -        | -                    | -                    | -       | -               | -                  | -                 |
| Hippocampus                  | 14     | -        | -                    | -                    | -       | -               | -                  | -                 |
| Thalamus                     | 15     | -        | -                    | -                    | -       | -               | -                  | -                 |
| Hypothalamus                 | 16     | -        | -                    | -                    | -       | -               | -                  | -                 |
| Midbrain                     | 17     | -        | -                    | -                    | -       | -               | -                  | -                 |
| Pons                         | 18     | -        | -                    | -                    | -       | -               | -                  | -                 |
| Medulla                      | 19     | -        | -                    | -                    | -       | -               | -                  | -                 |
| Cerebellum                   | 20     | -        | -                    | -                    | -       | -               | -                  | -                 |
| Superficial Nodes (2)        | 21     | 3.01510  | 3.05805              | 0.04295              | 2670    | 2645            | 306.02             | 397.94            |
| Cervical Nodes (2)           | 22     | 3.00900  | 3.01738              | 0.00838              | 182     | 157             | 93.10              | 121.06            |
| Thyroid                      | 23     | 3.01560  | 3.03918              | 0.02358              | 1398    | 1373            | 289.35             | 376.25            |
| Olfactory Epithelium         | 24     | 2.99270  | 3.08032              | 0.08762              | 27913   | 27888           | 1,581.64           | 2,056.69          |
| Respiratory Epithelium       | 25     | 2.99219  | 3.07092              | 0.07873              | 7247048 | 7247023         | 457,417.17         | 594,803.90        |
| Axillary Nodes (2)           | 26     | 2.99516  | 3.03300              | 0.03784              | 99      | 74              | 9.72               | 12.64             |
| Muscle (R, deltoid)          | 27     | 2.98001  | 3.02235              | 0.04234              | 65      | 40              | 4.69               | 6.10              |
| Liver (R, superficial lobe)  | 28     | 2.96703  | 3.02058              | 0.05355              | 118     | 93              | 8.63               | 11.22             |
| Kidney (L, tip)              | 29     | 2.97310  | 3.01929              | 0.04619              | 146     | 121             | 13.02              | 16.93             |
| Lung (R, top lobe)           | 30     | 2.98463  | 3.01900              | 0.03437              | 105     | 80              | 11.57              | 15.04             |
| Trachea (near cut-off)       | 31     | 2.97750  | 2.99399              | 0.01649              | 59      | 34              | 10.25              | 13.32             |
| Esophagus (near cut-off)     | 32     | 2.98137  | 2.99524              | 0.01387              | 83      | 58              | 20.78              | 27.02             |
| Spleen (tip)                 | 33     | 2.97100  | 3.02746              | 0.05646              | 241     | 216             | 19.01              | 24.72             |
| Heart                        | 34     | 2.97583  | 3.02643              | 0.05060              | 96      | 71              | 6.97               | 9.07              |
| Urine (fill to line of tube) | 35     | 2.98083  | 3.30202              | 0.32119              | 1155    | 1130            | 17.48              | 22.73             |
| Spinal Dura                  | 36     | 2.97184  | 2.98093              | 0.00909              | 486     | 461             | 252.02             | 327.71            |
| Lower Cervical Spinal Cord   | 37     | 2.99540  | 3.12892              | 0.13352              | 1312    | 1287            | 47.90              | 62.29             |
| Thoracic Spinal Cord         | 38     | 2.99122  | 3.06834              | 0.07712              | 504     | 479             | 30.86              | 40.13             |
| Lumbar Spinal Cord           | 39     | 2.98351  | 3.13752              | 0.15401              | 148     | 123             | 3.97               | 5.16              |
| Blood Sample                 | 40     | 3.00915  | 3.30557              | 0.29642              | 2216    | 2191            | 36.73              | 47.76             |
| Drug Standard                | 41     | 2.97304  | 2.97555              | 0.00251              | 3829267 | 3829242         | 7,581,099.02       | 9,858,106.66      |
| Drug Standard                | 42     | 2.97524  | 2.97831              | 0.00307              | 3813167 | 3813142         | 6,172,167.17       | 8,025,997.56      |
| Drug Standard                | 43     | 2.97974  | 2.98220              | 0.00246              | 3599481 | 3599456         | 7,271,011.63       | 9,454,883.51      |
|                              |        |          |                      |                      |         |                 | 0.201<br>cpm/fmol  | 0.155<br>cpm/fmol |

| Auto Calculations                                        | Enter Values                        |
|----------------------------------------------------------|-------------------------------------|
| Total uL of Dose Sol = 63.2                              | Oxytocin Molecular Weight = 1,007   |
| Hot mg = 0.0000                                          | Date of Synthesis = 11/13/07        |
| Cold mg = 0.5138                                         | Hot uCi/uL at Synthesis = 2.320     |
| Total mg in Dose Sol = 0.5138                            | Hot uCi/ug at Synthesis = 1985.72   |
| Conc Of Dose Sol (ug/uL) = 8.1294                        | Cold ug/uL = 15.00                  |
| Days after Synthesis Delivered = 13                      | Desired uCi = 45.0                  |
| Decay on Day Delivered = 0.8606                          | Desired mg = 0.400                  |
| Total uCi in Dose Sol on Day Delivered = 57.80           | Estimated Desired nmol = 397.1      |
| uCi/uL in Dose Sol on Day Delivered = 0.9146             | <b>Date of Delivery = 11/26/07</b>  |
| mg delivered = 0.400                                     | <b>uL delivered (actual) = 49.2</b> |
| uCi delivered = 45.00                                    | <b>Date of Counting = 11/26/07</b>  |
| Estimated nmol delivered = 397.11                        | <b>Dose Calculator</b>              |
| Days after Synthesis Counted = 13                        | uL Hot to Deliver = 22.54           |
| Decay on Day Counted = 0.8606                            | uL Cold to Deliver = 26.66          |
| Specific Activity from Amersham Specs (cpm/fmol) = 0.201 | Total uL to Deliver = 49.20         |
| Avg. Volume of Standard (uL)* = 3.0                      | Hot to Cold Ratio = 0.85            |
| Avg. CPM-bkgd of Standard = 3,747,280                    | Total uL to Make = 63.20            |
| Specific Activity from Standards: (CPM/fmol) = 0.155     | Dose Solution uL Hot = 28.95        |
| Date of Disposal from Decay Storage = 07/05/09           | Dose Solution uL Cold = 34.25       |



**Table B17: Intranasal Oxytocin with 1% Mucoadhesive Rat 38 Data**

| Oxytocin Rat 38<br>1% Mucoadhesive | Route | Com-<br>pound | Volume<br>(uL) | uCi   | mg    | Time (min) | Perfused @ (min) |
|------------------------------------|-------|---------------|----------------|-------|-------|------------|------------------|
| Amount Delivered:                  | IN    | Oxytocin      | 49             | 45.00 | 0.400 | 14:00      | 30:02            |

| Tissue Description           | Tube # | Tube (g) | Tissue +<br>Tube (g) | Tissue<br>Weight (g) | CPM     | CPM -25<br>bkgd | nM<br>(Spec. Act.) | nM (Stan.)        |
|------------------------------|--------|----------|----------------------|----------------------|---------|-----------------|--------------------|-------------------|
| Dorsal Dura                  | 1      | 2.98474  | 2.99929              | 0.01455              | 662     | 637             | 217.56             | 254.73            |
| Ventral Dura                 | 2      | 2.99941  | 3.01341              | 0.01400              | 3070    | 3045            | 1,080.82           | 1,265.53          |
| Trigeminal Ganglion          | 3      | 3.03298  | 3.05865              | 0.02567              | 256     | 231             | 44.72              | 52.36             |
| Maxillary Nerve              | 4      | 2.97008  | 2.98181              | 0.01173              | 346     | 321             | 135.99             | 159.23            |
| Ophthalmic Nerve             | 5      | 2.99184  | 2.99589              | 0.00405              | 98      | 73              | 89.57              | 104.88            |
| Mandibular Nerve             | 6      | 2.99436  | 2.99781              | 0.00345              | 120     | 95              | 136.84             | 160.22            |
| Upper Cervical Spinal Cord   | 7      | 2.98937  | 3.04383              | 0.05446              | 396     | 371             | 33.85              | 39.64             |
| Olfactory Bulbs              | 8      | 3.00233  | 3.07819              | 0.07586              | 943     | 918             | 60.13              | 70.41             |
| Anterior Olfactory Nucleus   | 9      | 2.98405  | 3.02345              | 0.03940              | 230     | 205             | 25.86              | 30.27             |
| Frontal Cortex               | 10     | 2.98955  | 3.03140              | 0.04185              | 337     | 312             | 37.05              | 43.38             |
| Caudate/Putamen              | 11     | 3.01634  | 3.02734              | 0.01100              | 67      | 42              | 18.97              | 22.22             |
| Septal Nucleus               | 12     | 3.04853  | 3.06177              | 0.01324              | 238     | 213             | 79.94              | 93.61             |
| Parietal Cortex              | 13     | 2.99157  | 3.03063              | 0.03906              | 170     | 145             | 18.45              | 21.60             |
| Hippocampus                  | 14     | 3.01874  | 3.04413              | 0.02539              | 140     | 115             | 22.51              | 26.35             |
| Thalamus                     | 15     | 2.99313  | 3.06766              | 0.07453              | 159     | 134             | 8.93               | 10.46             |
| Hypothalamus                 | 16     | 3.02058  | 3.04180              | 0.02122              | 97      | 72              | 16.86              | 19.74             |
| Midbrain                     | 17     | 2.99985  | 3.11840              | 0.11855              | 3009    | 2984            | 125.08             | 146.46            |
| Pons                         | 18     | 3.02153  | 3.10521              | 0.08368              | 389     | 364             | 21.62              | 25.31             |
| Medulla                      | 19     | 3.00677  | 3.11416              | 0.10739              | 984     | 959             | 44.38              | 51.96             |
| Cerebellum                   | 20     | 3.01201  | 3.27714              | 0.26513              | 889     | 864             | 16.19              | 18.96             |
| Superficial Nodes (2)        | 21     | 2.98474  | 3.06241              | 0.07767              | 3995    | 3970            | 254.00             | 297.41            |
| Cervical Nodes (2)           | 22     | 2.98332  | 2.99117              | 0.00785              | 202     | 177             | 112.05             | 131.19            |
| Thyroid                      | 23     | 2.99828  | 3.01336              | 0.01508              | 1170    | 1145            | 377.31             | 441.79            |
| Olfactory Epithelium         | 24     | 3.00884  | 3.08746              | 0.07862              | 18060   | 18035           | 1,139.92           | 1,334.73          |
| Respiratory Epithelium       | 25     | 3.01584  | 3.05986              | 0.04402              | 6989496 | 6989471         | 789,018.79         | 923,859.81        |
| Axillary Nodes (2)           | 26     | 2.96967  | 3.00569              | 0.03602              | 114     | 89              | 12.28              | 14.38             |
| Muscle (R, deltoid)          | 27     | 3.06270  | 3.11785              | 0.05515              | 121     | 96              | 8.65               | 10.13             |
| Liver (R, superficial lobe)  | 28     | 2.97121  | 3.05382              | 0.08261              | 131     | 106             | 6.38               | 7.47              |
| Kidney (L, tip)              | 29     | 2.97531  | 3.02455              | 0.04924              | 407     | 382             | 38.55              | 45.14             |
| Lung (R, top lobe)           | 30     | 3.02748  | 3.06302              | 0.03554              | 133     | 108             | 15.10              | 17.68             |
| Trachea (near cut-off)       | 31     | 2.97249  | 2.99077              | 0.01828              | 70      | 45              | 12.23              | 14.32             |
| Esophagus (near cut-off)     | 32     | 2.98930  | 3.00891              | 0.01961              | 100     | 75              | 19.01              | 22.25             |
| Spleen (tip)                 | 33     | 3.06399  | 3.13008              | 0.06609              | 250     | 225             | 16.92              | 19.81             |
| Heart                        | 34     | 3.02486  | 3.07096              | 0.04610              | 104     | 79              | 8.52               | 9.97              |
| Urine (fill to line of tube) | 35     | 2.98206  | 3.30298              | 0.32092              | 2015    | 1990            | 30.81              | 36.08             |
| Spinal Dura                  | 36     | 2.98441  | 3.00182              | 0.01741              | 143     | 118             | 33.68              | 39.44             |
| Lower Cervical Spinal Cord   | 37     | 2.96513  | 3.10550              | 0.14037              | 89      | 64              | 2.27               | 2.65              |
| Thoracic Spinal Cord         | 38     | 3.01140  | 3.10919              | 0.09779              | 110     | 85              | 4.32               | 5.06              |
| Lumbar Spinal Cord           | 39     | 2.97403  | 3.14064              | 0.16661              | 122     | 97              | 2.89               | 3.39              |
| Blood Sample                 | 40     | 3.01345  | 3.29291              | 0.27946              | 2115    | 2090            | 37.16              | 43.51             |
| Drug Standard                | 41     | 2.98978  | 2.99256              | 0.00278              | 4227915 | 4227890         | 7,557,392.19       | 8,848,928.54      |
| Drug Standard                | 42     | 2.98539  | 2.98786              | 0.00247              | 4123975 | 4123950         | 8,296,778.87       | 9,714,674.24      |
| Drug Standard                | 43     | 2.99867  | 3.00108              | 0.00241              | 4066860 | 4066835         | 8,385,569.97       | 9,818,639.49      |
|                              |        |          |                      |                      |         |                 | 0.201<br>cpm/fmol  | 0.172<br>cpm/fmol |

| Auto Calculations                                        | Enter Values                      |
|----------------------------------------------------------|-----------------------------------|
| Total uL of Dose Sol = 63.5                              | Oxytocin Molecular Weight = 1,007 |
| Hot mg = 0.0000                                          | Date of Synthesis = 11/13/07      |
| Cold mg = 0.5132                                         | Hot uCi/uL at Synthesis = 2.320   |
| Total mg in Dose Sol = 0.5132                            | Hot uCi/ug at Synthesis = 1985.72 |
| Conc Of Dose Sol (ug/uL) = 8.0864                        | Cold ug/uL = 15.00                |
| Days after Synthesis Delivered = 14                      | Desired uCi = 45.0                |
| Decay on Day Delivered = 0.8507                          | Desired mg = 0.400                |
| Total uCi in Dose Sol on Day Delivered = 57.74           | Estimated Desired nmol = 397.1    |
| uCi/uL in Dose Sol on Day Delivered = 0.9097             | Date of Delivery = 11/27/07       |
| mg delivered = 0.400                                     | uL delivered (actual) = 49.5      |
| uCi delivered = 45.00                                    | Date of Counting = 11/27/07       |
| Estimated nmol delivered = 397.18                        | <b>Dose Calculator</b>            |
| Days after Synthesis Counted = 14                        | uL Hot to Deliver = 22.80         |
| Decay on Day Counted = 0.8507                            | uL Cold to Deliver = 26.66        |
| Specific Activity from Amersham Specs (cpm/fmol) = 0.201 | Total uL to Deliver = 49.47       |
| Avg. Volume of Standard (uL)* = 3.0                      | Hot to Cold Ratio = 0.86          |
| Avg. CPM-bkgd of Standard = 4,139,558                    | Total uL to Make = 63.47          |
| Specific Activity from Standards: (CPM/fmol) = 0.172     | Dose Solution uL Hot = 29.25      |
| Date of Disposal from Decay Storage = 07/05/09           | Dose Solution uL Cold = 34.21     |

**Table B18: Intranasal Oxytocin with 1% Mucoadhesive Rat 39 Data**

|                        |           |       |           |             |       |       |            |                  |
|------------------------|-----------|-------|-----------|-------------|-------|-------|------------|------------------|
| <b>Oxytocin Rat 39</b> | <b>1%</b> | Route | Com-pound | Volume (uL) | uCi   | mg    | Time (min) | Perfused @ (min) |
| <b>Mucoadhesive</b>    |           | IN    | Oxytocin  | 49          | 45.00 | 0.400 | 14:00      | 31:49            |
| Amount Delivered:      |           |       |           |             |       |       |            |                  |

| Tissue Description           | Tube # | Tube (g) | Tissue + Tube (g) | Tissue Weight (g) | CPM     | CPM -25 bkgd | nM (Spec. Act.)   | nM (Stan.)        |
|------------------------------|--------|----------|-------------------|-------------------|---------|--------------|-------------------|-------------------|
| Dorsal Dura                  | 1      | 3.00621  | 3.01778           | 0.01157           | 873     | 848          | 364.21            | 426.46            |
| Ventral Dura                 | 2      | 2.99566  | 3.01714           | 0.02148           | 3657    | 3632         | 840.24            | 983.84            |
| Trigeminal Ganglion          | 3      | 3.01364  | 3.04400           | 0.03036           | 1064    | 1039         | 170.06            | 199.12            |
| Maxillary Nerve              | 4      | 2.99029  | 3.00225           | 0.01196           | 1224    | 1199         | 498.17            | 583.31            |
| Ophthalmic Nerve             | 5      | 3.02048  | 3.02328           | 0.00280           | 2759    | 2734         | 4,852.14          | 5,681.36          |
| Mandibular Nerve             | 6      | 3.00348  | 3.00663           | 0.00315           | 2812    | 2787         | 4,396.63          | 5,148.00          |
| Upper Cervical Spinal Cord   | 7      | 2.97845  | 2.99964           | 0.02119           | 955     | 930          | 218.09            | 255.37            |
| Olfactory Bulbs              | 8      | 3.01077  | 3.07536           | 0.06459           | 2062    | 2037         | 156.72            | 183.50            |
| Anterior Olfactory Nucleus   | 9      | 2.97806  | 3.02146           | 0.04340           | 456     | 431          | 49.35             | 57.78             |
| Frontal Cortex               | 10     | 3.01557  | 3.05648           | 0.04091           | 599     | 574          | 69.72             | 81.64             |
| Caudate/Putamen              | 11     | 2.99604  | 3.00851           | 0.01247           | 205     | 180          | 71.73             | 83.99             |
| Septal Nucleus               | 12     | 2.99882  | 3.00797           | 0.00915           | 188     | 163          | 88.52             | 103.65            |
| Parietal Cortex              | 13     | 2.97833  | 3.01871           | 0.04038           | 310     | 285          | 35.07             | 41.07             |
| Hippocampus                  | 14     | 3.01925  | 3.05865           | 0.03940           | 272     | 247          | 31.15             | 36.48             |
| Thalamus                     | 15     | 2.99178  | 3.07949           | 0.08771           | 184     | 159          | 9.01              | 10.55             |
| Hypothalamus                 | 16     | 3.01112  | 3.03307           | 0.02195           | 167     | 142          | 32.15             | 37.64             |
| Midbrain                     | 17     | 3.07464  | 3.17764           | 0.10300           | 668     | 643          | 31.02             | 36.32             |
| Pons                         | 18     | 3.01117  | 3.08085           | 0.06968           | 452     | 427          | 30.45             | 35.66             |
| Medulla                      | 19     | 3.00793  | 3.11945           | 0.11152           | 978     | 953          | 42.47             | 49.72             |
| Cerebellum                   | 20     | 3.01155  | 3.27643           | 0.26488           | 1128    | 1103         | 20.69             | 24.23             |
| Superficial Nodes (2)        | 21     | 3.01901  | 3.10734           | 0.08833           | 1927    | 1902         | 107.00            | 125.29            |
| Cervical Nodes (2)           | 22     | 3.02369  | 3.03948           | 0.01579           | 2650    | 2625         | 826.11            | 967.30            |
| Thyroid                      | 23     | 3.01593  | 3.04068           | 0.02475           | 12749   | 12724        | 2,554.71          | 2,991.30          |
| Olfactory Epithelium         | 24     | 3.03153  | 3.13960           | 0.10807           | 316034  | 316009       | 14,530.73         | 17,013.99         |
| Respiratory Epithelium       | 25     | 3.00003  | 3.06888           | 0.06885           | 9041362 | 9041337      | 652,562.01        | 764,082.96        |
| Axillary Nodes (2)           | 26     | 2.97565  | 3.01336           | 0.03771           | 138     | 113          | 14.89             | 17.44             |
| Muscle (R, deltoid)          | 27     | 2.97858  | 3.02721           | 0.04863           | 106     | 81           | 8.28              | 9.69              |
| Liver (R, superficial lobe)  | 28     | 2.99998  | 3.06296           | 0.06298           | 195     | 170          | 13.41             | 15.71             |
| Kidney (L, tip)              | 29     | 2.97578  | 3.05057           | 0.07479           | 468     | 443          | 29.43             | 34.46             |
| Lung (R, top lobe)           | 30     | 2.96379  | 3.00597           | 0.04218           | 125     | 100          | 11.78             | 13.79             |
| Trachea (near cut-off)       | 31     | 2.96887  | 2.99071           | 0.02184           | 59      | 34           | 7.74              | 9.06              |
| Esophagus (near cut-off)     | 32     | 2.99771  | 3.01379           | 0.01608           | 88      | 63           | 19.47             | 22.80             |
| Spleen (tip)                 | 33     | 2.97245  | 3.02525           | 0.05280           | 257     | 232          | 21.83             | 25.57             |
| Heart                        | 34     | 3.06389  | 3.11546           | 0.05157           | 217     | 192          | 18.50             | 21.66             |
| Urine (fill to line of tube) | 35     | 3.02442  | 3.29841           | 0.27399           | 1990    | 1965         | 35.64             | 41.73             |
| Spinal Dura                  | 36     | 2.98032  | 2.99294           | 0.01262           | 1001    | 976          | 384.31            | 449.99            |
| Lower Cervical Spinal Cord   | 37     | 2.98111  | 3.15494           | 0.17383           | 691     | 666          | 19.04             | 22.29             |
| Thoracic Spinal Cord         | 38     | 2.97135  | 3.04548           | 0.07413           | 251     | 226          | 15.15             | 17.74             |
| Lumbar Spinal Cord           | 39     | 3.02607  | 3.15673           | 0.13066           | 344     | 319          | 12.13             | 14.21             |
| Blood Sample                 | 40     | 2.99658  | 3.29780           | 0.30122           | 3172    | 3147         | 51.92             | 60.79             |
| Drug Standard                | 41     | 2.98978  | 2.99256           | 0.00278           | 4227915 | 4227890      | 7,557,392.19      | 8,848,928.54      |
| Drug Standard                | 42     | 2.98539  | 2.98786           | 0.00247           | 4123975 | 4123950      | 8,296,778.87      | 9,714,674.24      |
| Drug Standard                | 43     | 2.99867  | 3.00108           | 0.00241           | 4066860 | 4066835      | 8,385,569.97      | 9,818,639.49      |
|                              |        |          |                   |                   |         |              | 0.201<br>cpm/fmol | 0.172<br>cpm/fmol |

| Auto Calculations                                        | Enter Values                        |
|----------------------------------------------------------|-------------------------------------|
| Total uL of Dose Sol = 63.5                              | Oxytocin Molecular Weight = 1,007   |
| Hot mg = 0.0000                                          | Date of Synthesis = 11/13/07        |
| Cold mg = 0.5132                                         | Hot uCi/uL at Synthesis = 2.320     |
| Total mg in Dose Sol = 0.5132                            | Hot uCi/ug at Synthesis = 1985.72   |
| Conc Of Dose Sol (ug/uL) = 8.0864                        | Cold ug/uL = 15.00                  |
| Days after Synthesis Delivered = 14                      | Desired uCi = 45.0                  |
| Decay on Day Delivered = 0.8507                          | Desired mg = 0.400                  |
| Total uCi in Dose Sol on Day Delivered = 57.74           | Estimated Desired nmol = 397.1      |
| uCi/uL in Dose Sol on Day Delivered = 0.9097             | <b>Date of Delivery = 11/27/07</b>  |
| mg delivered = 0.400                                     | <b>uL delivered (actual) = 49.5</b> |
| uCi delivered = 45.00                                    | <b>Date of Counting = 11/27/07</b>  |
| Estimated nmol delivered = 397.18                        | <b>Dose Calculator</b>              |
| Days after Synthesis Counted = 14                        | uL Hot to Deliver = 22.80           |
| Decay on Day Counted = 0.8507                            | uL Cold to Deliver = 26.66          |
| Specific Activity from Amersham Specs (cpm/fmol) = 0.201 | Total uL to Deliver = 49.47         |
| Avg. Volume of Standard (uL)* = 3.0                      | Hot to Cold Ratio = 0.86            |
| Avg. CPM-bkgd of Standard = 4,139,558                    | Total uL to Make = 63.47            |
| Specific Activity from Standards: (CPM/fmol) = 0.172     | Dose Solution uL Hot = 29.25        |
| Date of Disposal from Decay Storage = 07/05/09           | Dose Solution uL Cold = 34.21       |

## **Appendix C – Intranasal Oxytocin Extended Time Point (1 h)**

### **Tables**

Table C01: Intranasal Oxytocin Rat 30 (1 h sac) Data

Table C02: Intranasal Oxytocin with Mucoadhesive, Rat 31 (1 h sac) Data

**Table C01: Intranasal Oxytocin Extended Timepoint Rat 30**

| Oxytocin Rat 30<br>*1 Hour SAC* | Route | Com-pound | Volume (uL) | uCi   | mg    | Time (min) | Perfused @ (min) |
|---------------------------------|-------|-----------|-------------|-------|-------|------------|------------------|
| Amount Delivered:               | IN    | Oxytocin  | 52          | 45.00 | 0.400 | 13:56      | 60:40            |

| Tissue Description           | Tube # | Tube (g) | Tissue + Tube (g) | Tissue Weight (g) | CPM      | CPM -25 bkgd | nM (Spec. Act.)   | nM (Stan.)        |
|------------------------------|--------|----------|-------------------|-------------------|----------|--------------|-------------------|-------------------|
| Dorsal Dura                  | 1      | 3.01212  | 3.02467           | 0.01255           | 822      | 797          | 315.58            | 364.43            |
| Ventral Dura                 | 2      | 2.98277  | 2.99391           | 0.01114           | 1121     | 1096         | 488.90            | 564.57            |
| Trigeminal Ganglion          | 3      | 2.97945  | 3.00207           | 0.02262           | 1213     | 1188         | 260.99            | 301.38            |
| Maxillary Nerve              | 4      | 3.01021  | 3.02404           | 0.01383           | 418      | 393          | 141.21            | 163.07            |
| Ophthalmic Nerve             | 5      | 3.01648  | 3.01857           | 0.00209           | 101      | 76           | 180.70            | 208.67            |
| Mandibular Nerve             | 6      | 2.98867  | 2.99272           | 0.00405           | 167      | 142          | 174.23            | 201.20            |
| Upper Cervical Spinal Cord   | 7      | 2.98985  | 3.04365           | 0.05380           | 191      | 166          | 15.33             | 17.71             |
| Olfactory Bulbs              | 8      | 3.01846  | 3.08977           | 0.07131           | 1024     | 999          | 69.62             | 80.39             |
| Anterior Olfactory Nucleus   | 9      | 3.00768  | 3.04386           | 0.03618           | 287      | 262          | 35.99             | 41.56             |
| Frontal Cortex               | 10     | 3.00296  | 3.04059           | 0.03763           | 191      | 166          | 21.92             | 25.31             |
| Caudate/Putamen              | 11     | 2.98035  | 2.98968           | 0.00933           | 76       | 51           | 27.16             | 31.37             |
| Septal Nucleus               | 12     | 2.99064  | 3.00163           | 0.01099           | 71       | 46           | 20.80             | 24.02             |
| Parietal Cortex              | 13     | 3.02139  | 3.06659           | 0.04520           | 135      | 110          | 12.09             | 13.97             |
| Hippocampus                  | 14     | 3.06233  | 3.10633           | 0.04400           | 146      | 121          | 13.67             | 15.78             |
| Thalamus                     | 15     | 3.00124  | 3.08777           | 0.08653           | 193      | 168          | 9.65              | 11.14             |
| Hypothalamus                 | 16     | 3.01216  | 3.03286           | 0.02070           | 118      | 93           | 22.33             | 25.78             |
| Midbrain                     | 17     | 3.00182  | 3.10442           | 0.10260           | 386      | 361          | 17.48             | 20.19             |
| Pons                         | 18     | 2.99813  | 3.06686           | 0.06873           | 528      | 503          | 36.37             | 42.00             |
| Medulla                      | 19     | 3.05246  | 3.15468           | 0.10222           | 677      | 652          | 31.70             | 36.60             |
| Cerebellum                   | 20     | 2.97758  | 3.24430           | 0.26672           | 1300     | 1275         | 23.75             | 27.43             |
| Superficial Nodes (2)        | 21     | 3.01092  | 3.12684           | 0.11592           | 2221     | 2196         | 94.14             | 108.71            |
| Cervical Nodes (2)           | 22     | 3.00024  | 3.01274           | 0.01250           | 854      | 829          | 329.56            | 380.58            |
| Thyroid                      | 23     | 2.97579  | 2.99307           | 0.01728           | 8702     | 8677         | 2,495.28          | 2,881.52          |
| Olfactory Epithelium         | 24     | 3.00004  | 3.09845           | 0.09841           | 1718249  | 1718224      | 86,762.81         | 100,192.82        |
| Respiratory Epithelium       | 25     | 3.00639  | 3.06132           | 0.05493           | 10292795 | 10292770     | 931,141.64        | 1,075,272.95      |
| Axillary Nodes (2)           | 26     | 2.96417  | 3.00723           | 0.04306           | 411      | 386          | 44.55             | 51.44             |
| Muscle (R, deltoid)          | 27     | 2.97834  | 3.02953           | 0.05119           | 346      | 321          | 31.16             | 35.98             |
| Liver (R, superficial lobe)  | 28     | 2.97732  | 3.02915           | 0.05183           | 220      | 195          | 18.70             | 21.59             |
| Kidney (L, tip)              | 29     | 2.98160  | 3.04423           | 0.06263           | 1838     | 1813         | 143.85            | 166.12            |
| Lung (R, top lobe)           | 30     | 2.96820  | 3.01629           | 0.04809           | 493      | 468          | 48.36             | 55.85             |
| Trachea (near cut-off)       | 31     | 2.99400  | 3.01045           | 0.01645           | 325      | 300          | 90.63             | 104.65            |
| Esophagus (near cut-off)     | 32     | 2.98586  | 3.00408           | 0.01822           | 211      | 186          | 50.73             | 58.58             |
| Spleen (tip)                 | 33     | 2.98415  | 3.04748           | 0.06333           | 776      | 751          | 58.93             | 68.05             |
| Heart                        | 34     | 2.97711  | 3.04488           | 0.06777           | 436      | 411          | 30.14             | 34.80             |
| Urine (fill to line of tube) | 35     | 2.98665  | 3.21091           | 0.22426           | 26437    | 26412        | 585.25            | 675.84            |
| Spinal Dura                  | 36     | 2.97660  | 2.99388           | 0.01728           | 104      | 79           | 22.72             | 26.23             |
| Lower Cervical Spinal Cord   | 37     | 2.97884  | 3.10630           | 0.12746           | 255      | 230          | 8.97              | 10.35             |
| Thoracic Spinal Cord         | 38     | 3.04253  | 3.11859           | 0.07606           | 171      | 146          | 9.54              | 11.02             |
| Lumbar Spinal Cord           | 39     | 3.00499  | 3.13956           | 0.13457           | 457      | 432          | 15.95             | 18.42             |
| Blood Sample                 | 40     | 3.00842  | 3.29540           | 0.28698           | 7765     | 7740         | 134.02            | 154.77            |
| Drug Standard                | 41     | 2.98690  | 2.98930           | 0.00240           | 4020511  | 4020486      | 8,324,542.78      | 9,613,097.89      |
| Drug Standard                | 42     | 2.99074  | 2.99319           | 0.00245           | 3980011  | 3979986      | 8,072,508.99      | 9,322,051.81      |
| Drug Standard                | 43     | 3.01152  | 3.01397           | 0.00245           | 3986239  | 3986214      | 8,085,141.09      | 9,336,639.23      |
|                              |        |          |                   |                   |          |              | 0.201<br>cpm/fmol | 0.174<br>cpm/fmol |

| Auto Calculations                                        | Enter Values                        |
|----------------------------------------------------------|-------------------------------------|
| Total uL of Dose Sol = 66.0                              | Oxytocin Molecular Weight = 1,007   |
| Hot mg = 0.0000                                          | Date of Synthesis = 10/23/07        |
| Cold mg = 0.5077                                         | Hot uCi/uL at Synthesis = 2.320     |
| Total mg in Dose Sol = 0.5078                            | Hot uCi/ug at Synthesis = 1985.72   |
| Conc Of Dose Sol (ug/uL) = 7.6978                        | Cold ug/uL = 15.00                  |
| Days after Synthesis Delivered = 23                      | Desired uCi = 45.0                  |
| Decay on Day Delivered = 0.7667                          | Desired mg = 0.400                  |
| Total uCi in Dose Sol on Day Delivered = 57.12           | Estimated Desired nmol = 397.1      |
| uCi/uL in Dose Sol on Day Delivered = 0.8660             | <b>Date of Delivery = 11/15/07</b>  |
| mg delivered = 0.400                                     | <b>uL delivered (actual) = 52.0</b> |
| uCi delivered = 45.00                                    | <b>Date of Counting = 11/15/07</b>  |
| Estimated nmol delivered = 397.12                        | <b>Dose Calculator</b>              |
| Days after Synthesis Counted = 23                        | uL Hot to Deliver = 25.30           |
| Decay on Day Counted = 0.7667                            | uL Cold to Deliver = 26.66          |
| Specific Activity from Amersham Specs (cpm/fmol) = 0.201 | Total uL to Deliver = 51.96         |
| Avg. Volume of Standard (uL)* = 3.0                      | Hot to Cold Ratio = 0.95            |
| Avg. CPM-bkgd of Standard = 3,995,562                    | Total uL to Make = 65.96            |
| Specific Activity from Standards: (CPM/fmol) = 0.174     | Dose Solution uL Hot = 32.11        |
| Date of Disposal from Decay Storage = 06/14/09           | Dose Solution uL Cold = 33.85       |

**Table C02: Intranasal Oxytocin Extended Timepoint Rat 31**

| Oxytocin Rat 31<br>1 h SAC, 1% Mucoadhesive | Route | Com-pound | Volume (uL) | uCi   | mg    | Time (min) | Perfused @ (min) |
|---------------------------------------------|-------|-----------|-------------|-------|-------|------------|------------------|
| Amount Delivered:                           | IN    | Oxytocin  | 47          | 45.00 | 0.400 | 14:00      | 60:36            |

| Tissue Description           | Tube # | Tube (g) | Tissue + Tube (g) | Tissue Weight (g) | CPM     | CPM -25 bkgd | nM (Spec. Act.) | nM (Stan.)   |
|------------------------------|--------|----------|-------------------|-------------------|---------|--------------|-----------------|--------------|
| Dorsal Dura                  | 1      | 3.01585  | 3.03105           | 0.01520           | 580     | 555          | 181.44          | 232.08       |
| Ventral Dura                 | 2      | 3.06751  | 3.07734           | 0.00983           | 11110   | 11085        | 5,603.70        | 7,167.69     |
| Trigeminal Ganglion          | 3      | 3.00020  | 3.02339           | 0.02319           | 4060    | 4035         | 864.64          | 1,105.96     |
| Maxillary Nerve              | 4      | 3.00610  | 3.01811           | 0.01201           | 1042    | 1017         | 420.80          | 538.24       |
| Ophthalmic Nerve             | 5      | 3.06059  | 3.06378           | 0.00319           | 257     | 232          | 361.40          | 462.27       |
| Mandibular Nerve             | 6      | 2.99856  | 3.00089           | 0.00233           | 152     | 127          | 270.86          | 346.45       |
| Upper Cervical Spinal Cord   | 7      | 3.05914  | 3.11639           | 0.05725           | 259     | 234          | 20.31           | 25.98        |
| Olfactory Bulbs              | 8      | 3.01052  | 3.07508           | 0.06456           | 199     | 174          | 13.39           | 17.13        |
| Anterior Olfactory Nucleus   | 9      | 3.01589  | 3.06457           | 0.04868           | 116     | 91           | 9.29            | 11.88        |
| Frontal Cortex               | 10     | 3.03250  | 3.07537           | 0.04287           | 467     | 442          | 51.23           | 65.53        |
| Caudate/Putamen              | 11     | 3.01412  | 3.02621           | 0.01209           | 70      | 45           | 18.50           | 23.66        |
| Septal Nucleus               | 12     | 3.00787  | 3.01981           | 0.01194           | 53      | 28           | 11.65           | 14.91        |
| Parietal Cortex              | 13     | 3.00292  | 3.04754           | 0.04462           | 110     | 85           | 9.47            | 12.11        |
| Hippocampus                  | 14     | 3.01466  | 3.05196           | 0.03730           | 101     | 76           | 10.13           | 12.95        |
| Thalamus                     | 15     | 3.00008  | 3.07760           | 0.07752           | 110     | 85           | 5.45            | 6.97         |
| Hypothalamus                 | 16     | 3.02887  | 3.05473           | 0.02586           | 117     | 92           | 17.68           | 22.61        |
| Midbrain                     | 17     | 2.99932  | 3.09204           | 0.09272           | 207     | 182          | 9.75            | 12.48        |
| Pons                         | 18     | 2.98010  | 3.05411           | 0.07401           | 212     | 187          | 12.56           | 16.06        |
| Medulla                      | 19     | 3.01458  | 3.11926           | 0.10468           | 217     | 192          | 9.11            | 11.66        |
| Cerebellum                   | 20     | 3.00558  | 3.24884           | 0.24326           | 565     | 540          | 11.03           | 14.11        |
| Superficial Nodes (2)        | 21     | 3.06299  | 3.12206           | 0.05907           | 1806    | 1781         | 149.83          | 191.64       |
| Cervical Nodes (2)           | 22     | 3.01539  | 3.02843           | 0.01304           | 941     | 916          | 349.07          | 446.49       |
| Thyroid                      | 23     | 2.98144  | 3.00077           | 0.01933           | 11962   | 11937        | 3,068.71        | 3,925.19     |
| Olfactory Epithelium         | 24     | 3.00338  | 3.07505           | 0.07167           | 110967  | 110942       | 7,692.22        | 9,839.10     |
| Respiratory Epithelium       | 25     | 3.02786  | 3.08058           | 0.05272           | 8946967 | 8946942      | 843,319.80      | 1,078,688.73 |
| Axillary Nodes (2)           | 26     | 3.04431  | 3.09098           | 0.04667           | 245     | 220          | 23.42           | 29.96        |
| Muscle (R, deltoid)          | 27     | 2.99822  | 3.04586           | 0.04764           | 236     | 211          | 22.01           | 28.15        |
| Liver (R, superficial lobe)  | 28     | 2.99160  | 3.06382           | 0.07222           | 465     | 440          | 30.28           | 38.73        |
| Kidney (L, tip)              | 29     | 3.04163  | 3.10006           | 0.05843           | 541     | 516          | 43.88           | 56.13        |
| Lung (R, top lobe)           | 30     | 2.99049  | 3.03344           | 0.04295           | 174     | 149          | 17.24           | 22.05        |
| Trachea (near cut-off)       | 31     | 2.97930  | 2.99553           | 0.01623           | 226     | 201          | 61.54           | 78.72        |
| Esophagus (near cut-off)     | 32     | 2.99160  | 3.00696           | 0.01536           | 329     | 304          | 98.35           | 125.80       |
| Spleen (tip)                 | 33     | 2.98368  | 3.04439           | 0.06071           | 482     | 457          | 37.41           | 47.85        |
| Heart                        | 34     | 2.98004  | 3.03317           | 0.05313           | 275     | 250          | 23.38           | 29.91        |
| Urine (fill to line of tube) | 35     | 3.03614  | 3.31410           | 0.27796           | 4512    | 4487         | 80.22           | 102.61       |
| Spinal Dura                  | 36     | 2.98856  | 3.00994           | 0.02138           | 60      | 35           | 8.13            | 10.41        |
| Lower Cervical Spinal Cord   | 37     | 2.98816  | 3.10490           | 0.11674           | 117     | 92           | 3.92            | 5.01         |
| Thoracic Spinal Cord         | 38     | 2.99823  | 3.06300           | 0.06477           | 98      | 73           | 5.60            | 7.16         |
| Lumbar Spinal Cord           | 39     | 3.04144  | 3.17254           | 0.13110           | 147     | 122          | 4.62            | 5.91         |
| Blood Sample                 | 40     | 2.99872  | 3.26495           | 0.26623           | 4357    | 4332         | 80.86           | 103.43       |
| Drug Standard                | 41     | 3.04101  | 3.04414           | 0.00313           | 3899841 | 3899816      | 6,191,456.93    | 7,919,480.62 |
| Drug Standard                | 42     | 2.97715  | 2.98036           | 0.00321           | 4039416 | 4039391      | 6,253,223.31    | 7,998,485.88 |
| Drug Standard                | 43     | 3.04653  | 3.04931           | 0.00278           | 4150131 | 4150106      | 7,418,352.58    | 9,488,800.48 |
|                              |        |          |                   |                   |         |              | 0.201           | 0.157        |
|                              |        |          |                   |                   |         |              | cpm/fmol        | cpm/fmol     |

| Auto Calculations                                        | Enter Values                        |
|----------------------------------------------------------|-------------------------------------|
| Total uL of Dose Sol = 60.5                              | Oxytocin Molecular Weight = 1,007   |
| Hot mg = 0.0000                                          | Date of Synthesis = 11/13/07        |
| Cold mg = 0.5204                                         | Hot uCi/uL at Synthesis = 2.320     |
| Total mg in Dose Sol = 0.5204                            | Hot uCi/ug at Synthesis = 1985.72   |
| Conc Of Dose Sol (ug/uL) = 8.5994                        | Cold ug/uL = 15.00                  |
| Days after Synthesis Delivered = 2                       | Desired uCi = 45.0                  |
| Decay on Day Delivered = 0.9772                          | Desired mg = 0.400                  |
| Total uCi in Dose Sol on Day Delivered = 58.54           | Estimated Desired nmol = 397.1      |
| uCi/uL in Dose Sol on Day Delivered = 0.9674             | <b>Date of Delivery = 11/15/07</b>  |
| mg delivered = 0.400                                     | <b>uL delivered (actual) = 46.5</b> |
| uCi delivered = 45.00                                    | <b>Date of Counting = 11/15/07</b>  |
| Estimated nmol delivered = 397.10                        | <b>Dose Calculator</b>              |
| Days after Synthesis Counted = 2                         | uL Hot to Deliver = 19.85           |
| Decay on Day Counted = 0.9772                            | uL Cold to Deliver = 26.67          |
| Specific Activity from Amersham Specs (cpm/fmol) = 0.201 | Total uL to Deliver = 46.51         |
| Avg. Volume of Standard (uL)* = 3.0                      | Hot to Cold Ratio = 0.74            |
| Avg. CPM-bkgd of Standard = 4,029,771                    | Total uL to Make = 60.51            |
| Specific Activity from Standards: (CPM/fmol) = 0.157     | Dose Solution uL Hot = 25.82        |
| Date of Disposal from Decay Storage = 07/05/09           | Dose Solution uL Cold = 34.69       |

## **Appendix D – Autoradiography Images**

### **Figures**

Figure D01: Rat 10 Autoradiography Images

Figure D02: Rat 11 Autoradiography Images

Figure D03: Rat 12 Autoradiography Images

Figure D04: Rat 13 Autoradiography Images

Figure D05: Rat 14 Autoradiography Images

Figure D06: Rat 15 Autoradiography Images

Figure D07: Rat 16 Autoradiography Images

Figure D08: Rat 17 Autoradiography Images

Figure D09: Rat 22 Autoradiography Images

Figure D10: Rat 23 Autoradiography Images

Figure D11: Rat 28 Autoradiography Images

Figure D12: Rat 29 Autoradiography Images

Figure D13: Rat 34 Autoradiography Images

Figure D14: Rat 35 Autoradiography Images

Figure D15: Rat 36 Autoradiography Images

Figure D16: Rat 37 Autoradiography Images

**Figure D01: Rat 10**

Intranasal Delivery of Oxytocin (labeled and unlabeled)

Delivered 51 ul over 14 min; 45 uCi, 0.4 mg, 397 nmol

Down on 10/22/07, developed on 11/13/07.

Slices measured from Bregma.

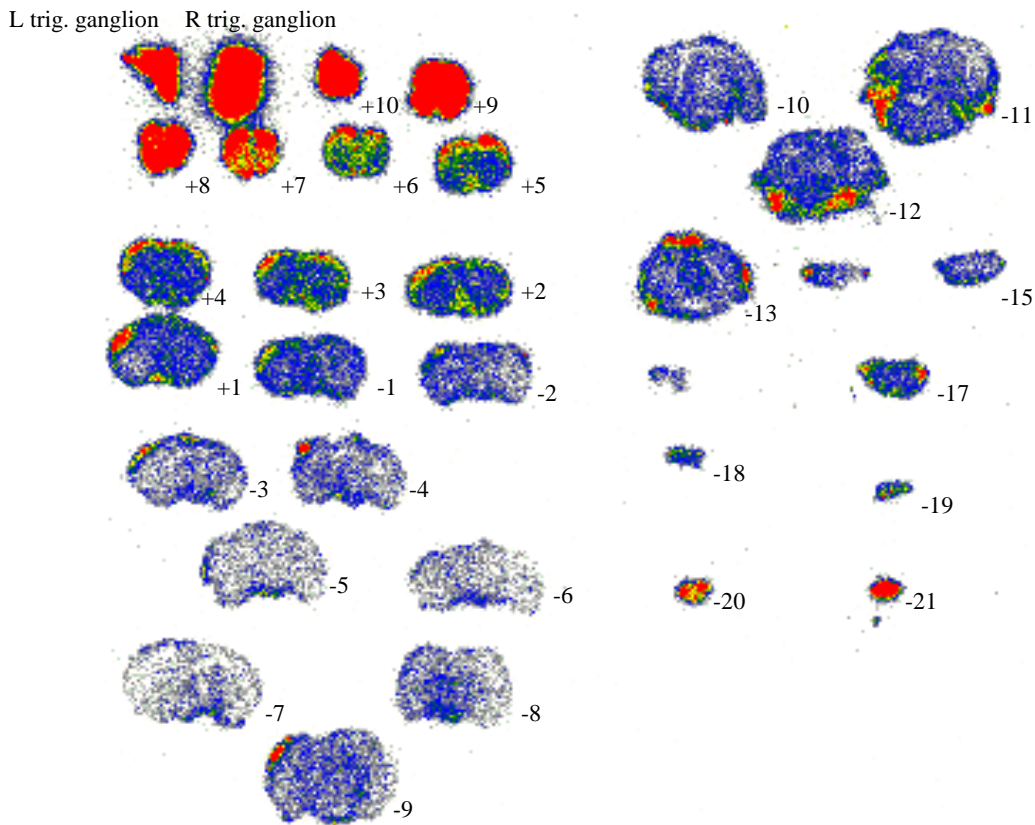

Image intensity range: 265-766

**Figure D02: Rat 11**

Intranasal Delivery of Oxytocin (labeled and unlabeled)  
Delivered 51 ul over 14 min; 45 uCi, 0.4 mg, 397 nmol  
Down on 10/22/07, developed on 11/13/07.  
Slices measured from Bregma.

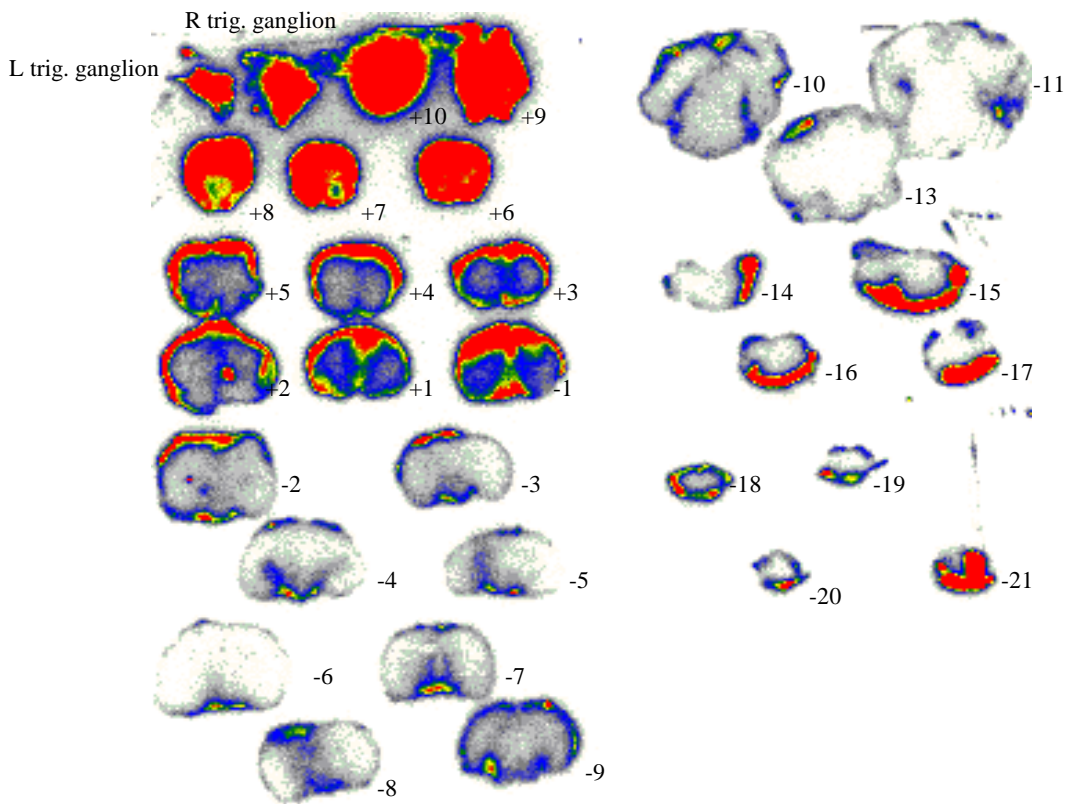

Image intensity range: 324-3223



**Figure D03: Rat 12**      Intranasal Delivery of Oxytocin (labeled and unlabeled)  
Delivered 52 ul over 14 min; 45 uCi, 0.4 mg, 397 nmol  
Down on 10/25/07, developed on 11/20/07.  
Slices measured from Bregma.

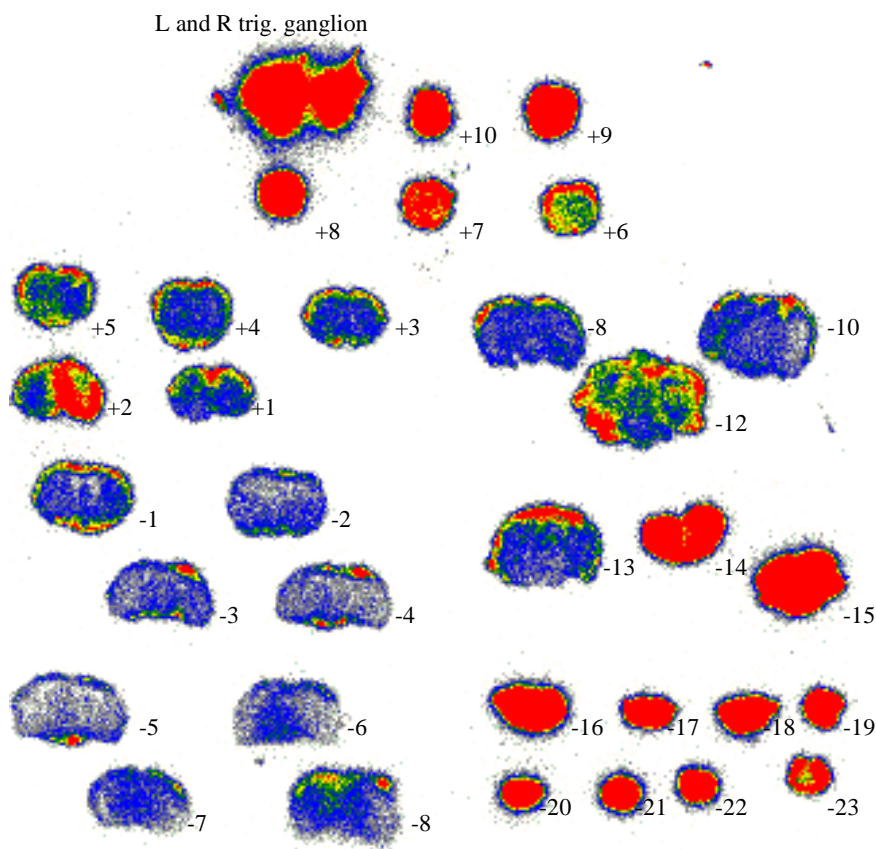

Image intensity range: 312-1141

**Figure D04: Rat 13**

Intranasal Delivery of Oxytocin (labeled and unlabeled)  
Delivered 52 ul over 14 min; 45 uCi, 0.4 mg, 397 nmol  
Down on 10/25/07, developed on 11/20/07.  
Slices measured from Bregma.

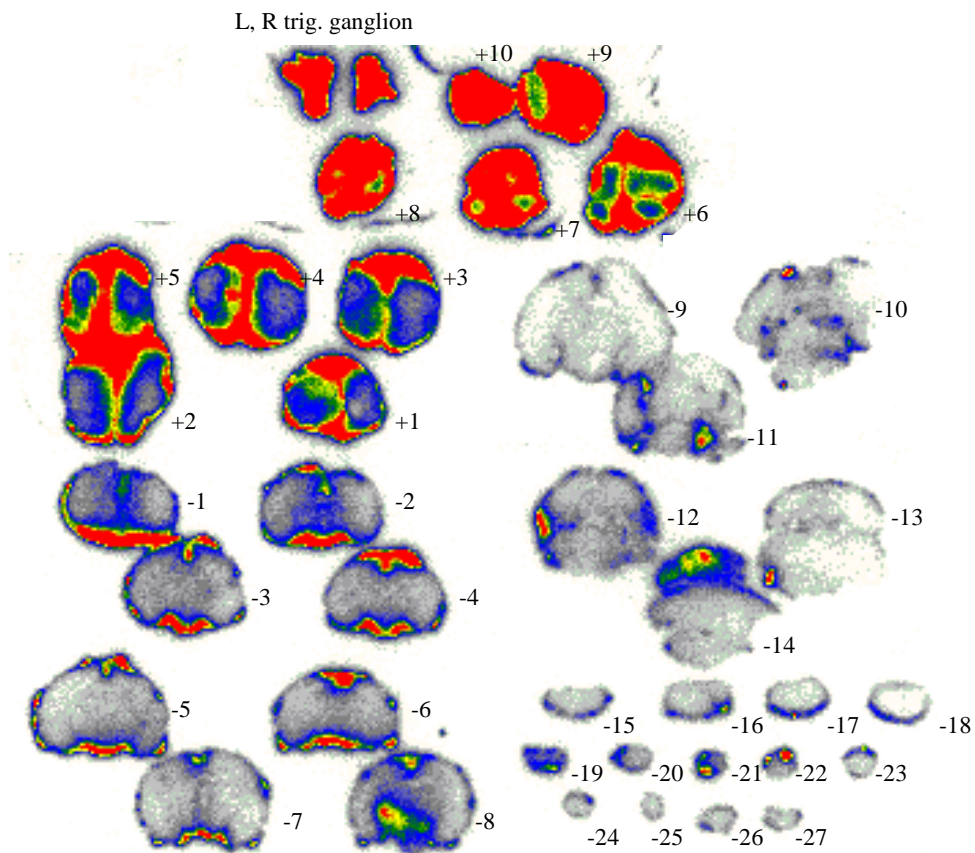

Image intensity range: 307-3627

**Figure D05: Rat 14**

Intranasal Delivery of Oxytocin (labeled and unlabeled)  
Delivered 53 ul over 14 min; 45 uCi, 0.4 mg, 397 nmol  
Down on 10/29/07, developed on 11/26/07.  
Slices measured from Bregma.

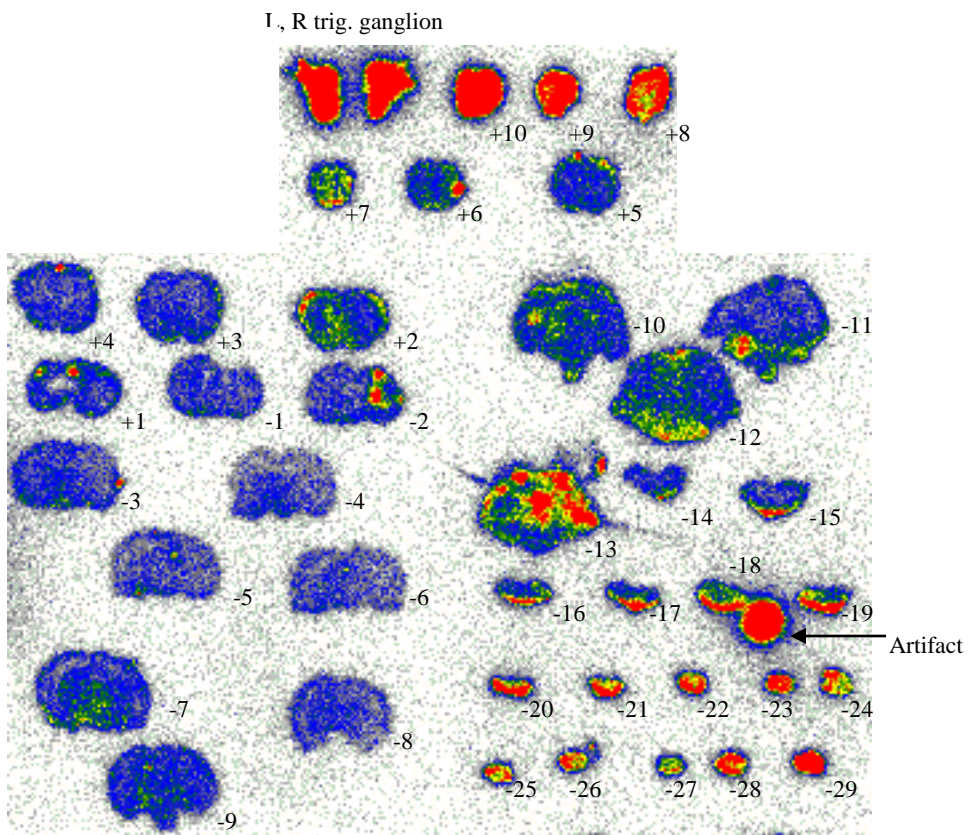

Image intensity range: 200-928

**Figure D06: Rat 15**

Intranasal Delivery of Oxytocin (labeled and unlabeled)  
Delivered 53 ul over 14 min; 45 uCi, 0.4 mg, 397 nmol  
Down on 10/29/07, developed on 11/26/07.  
Slices measured from Bregma.

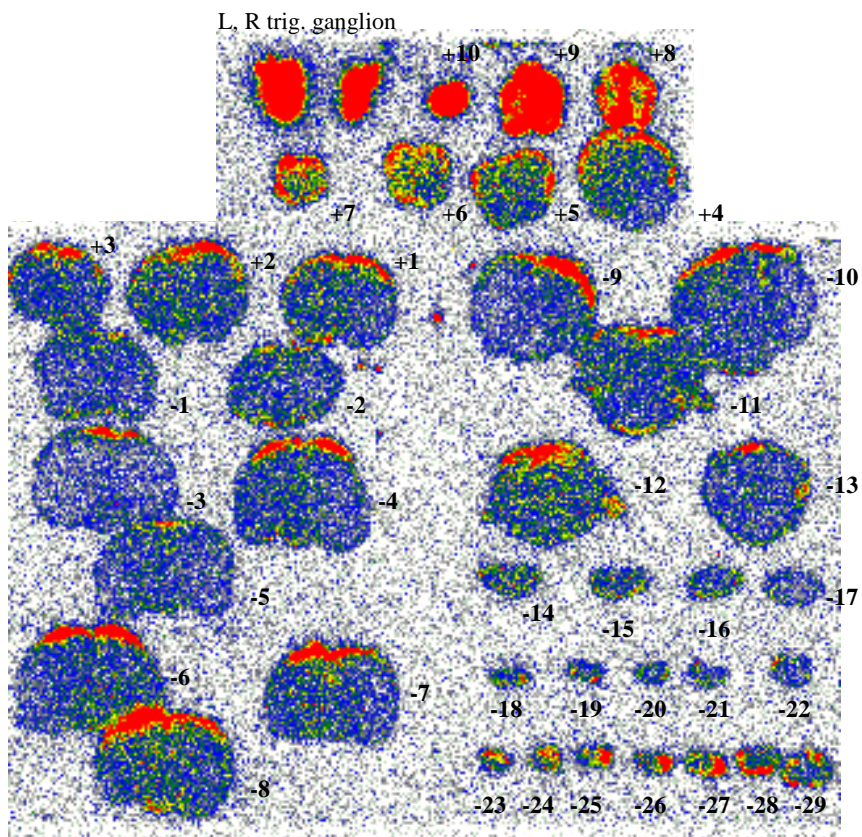

Image intensity range: 173-460

**Figure D07: Rat 16**

Intranasal Delivery of Oxytocin (labeled and unlabeled)  
Delivered 48 ul over 14 min; 45 uCi, 0.4 mg, 397 nmol  
Down on 10/30/07, developed on 12/11/07.  
Slices measured from Bregma.

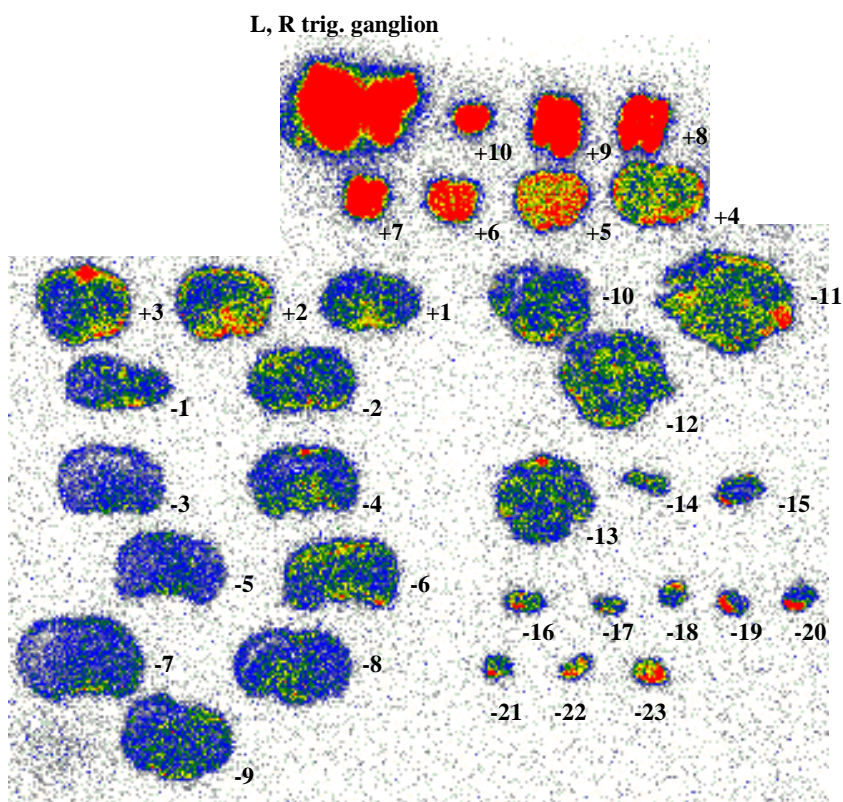

Image intensity range: 288-763

**Figure D08: Rat 17**

Intranasal Delivery of Oxytocin (labeled and unlabeled)  
Delivered 48 ul over 14 min; 45 uCi, 0.4 mg, 397 nmol  
Down on 10/30/07, developed on 12/11/07.  
Slices measured from Bregma.

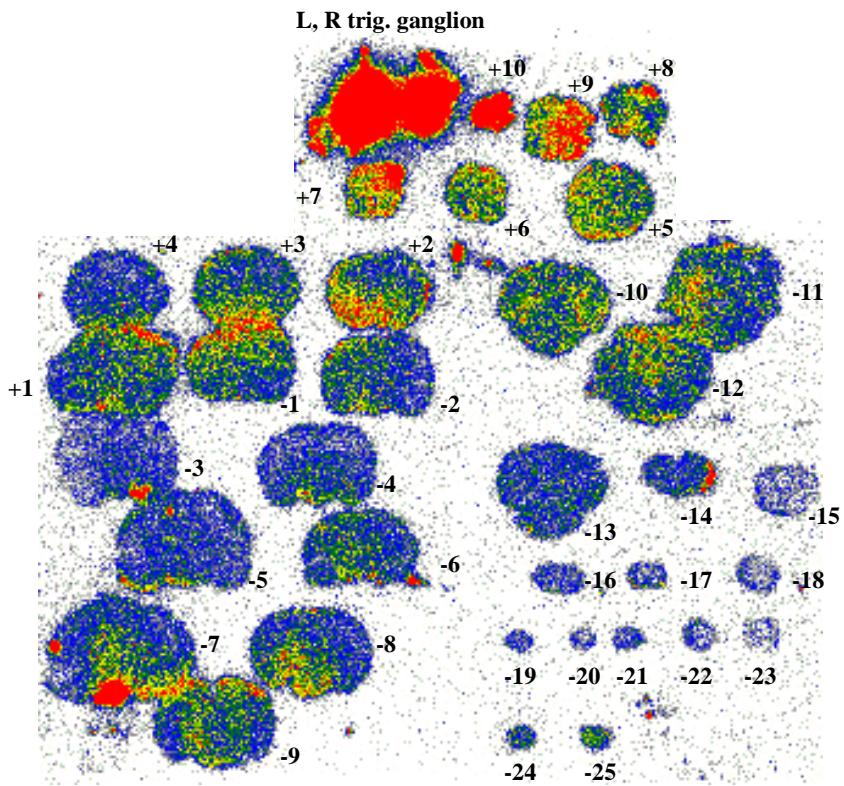

Image intensity range: 328-783

**Figure D09: Rat 22**

Intranasal Delivery of Oxytocin (labeled and unlabeled)  
with 1% Avicel Mucoadhesive

Delivered 48 ul over 14 min; 45 uCi, 0.4 mg, 397 nmol

Down on 10/30/07, developed on 12/11/07.

Slices measured from Bregma.

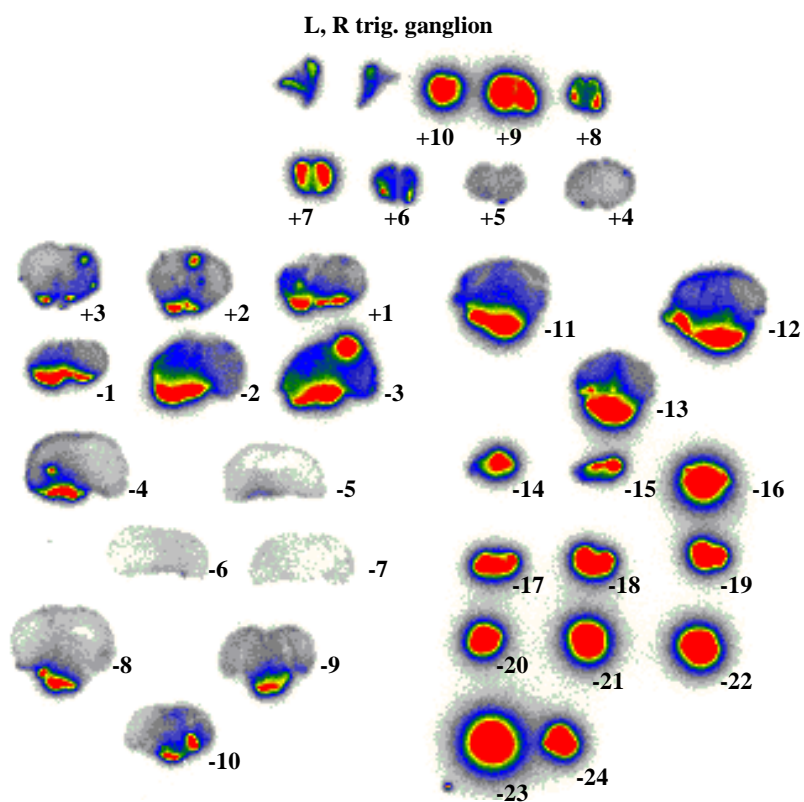

Image intensity range: 772-17,887

**Figure D10: Rat 23**

Intranasal Delivery of Oxytocin (labeled and unlabeled)  
with 1% Avicel Mucoadhesive

Delivered 48 ul over 14 min; 45 uCi, 0.4 mg, 397 nmol

Down on 10/30/07, developed on 12/11/07.

Slices measured from Bregma.

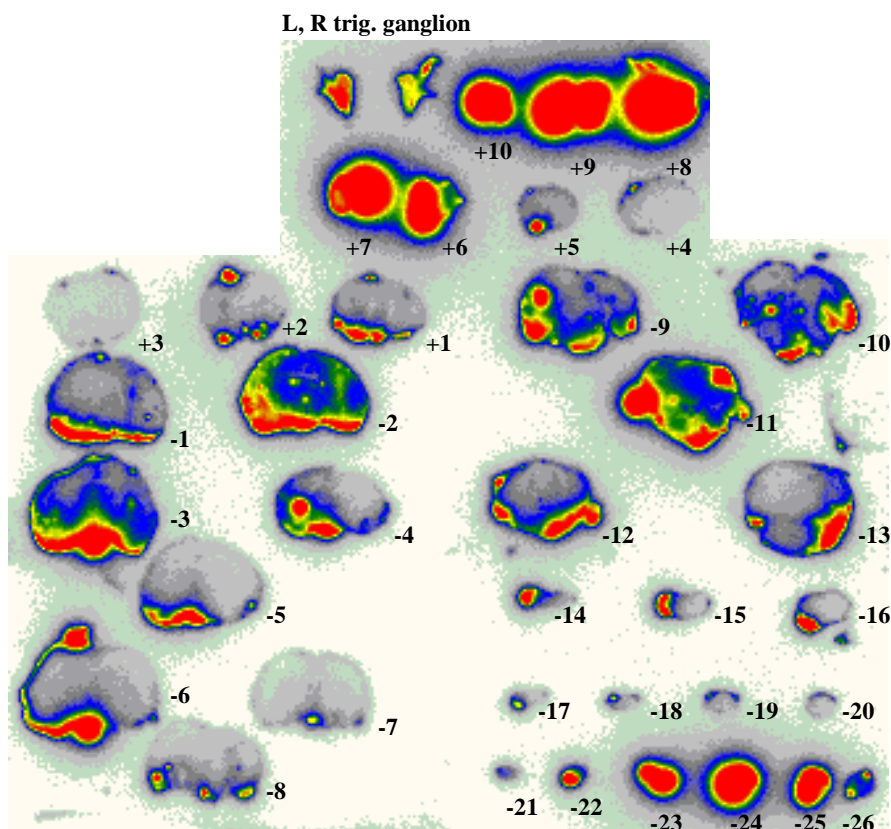



**Figure D11: Rat 28**

Intranasal Delivery of Oxytocin (labeled and unlabeled)  
with 1% Avicel Mucoadhesive

Delivered 51 ul over 14 min; 45 uCi, 0.4 mg, 397 nmol

Down on 11/13/07, developed on 12/17/07.

Slices measured from Bregma.

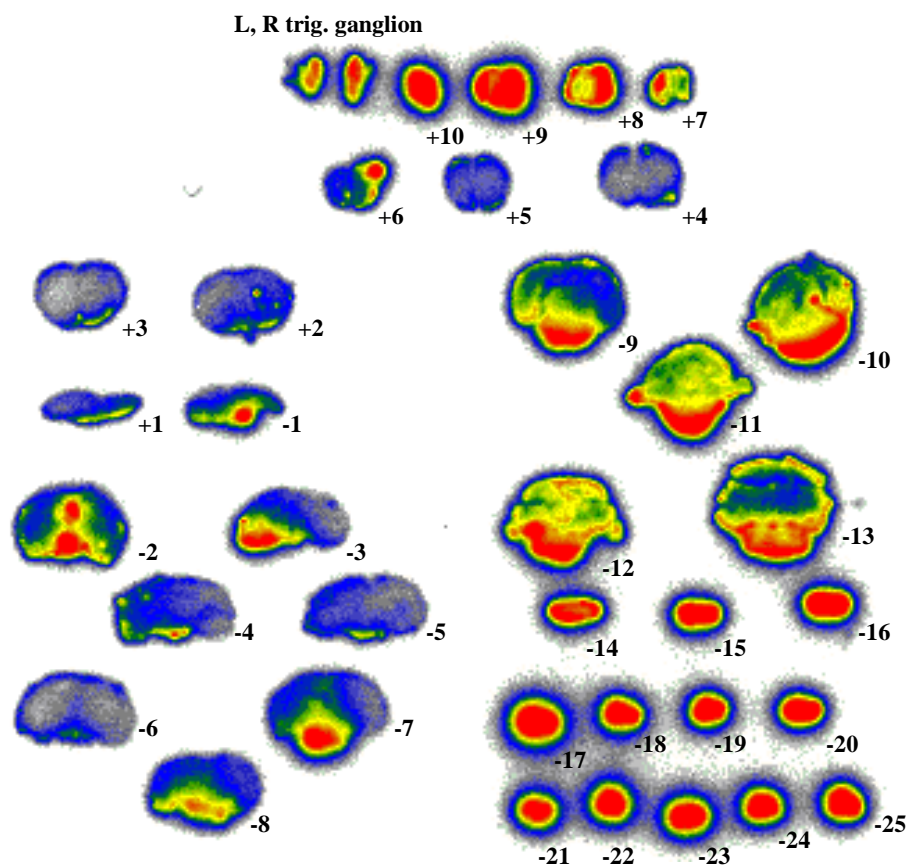

Image intensity range: 871-23,000

**Figure D12: Rat 29**

Intranasal Delivery of Oxytocin (labeled and unlabeled)  
with 1% Avicel Mucoadhesive

Delivered 51 ul over 14 min; 45 uCi, 0.4 mg, 397 nmol

Down on 11/13/07, developed on 12/17/07.

Slices measured from Bregma.

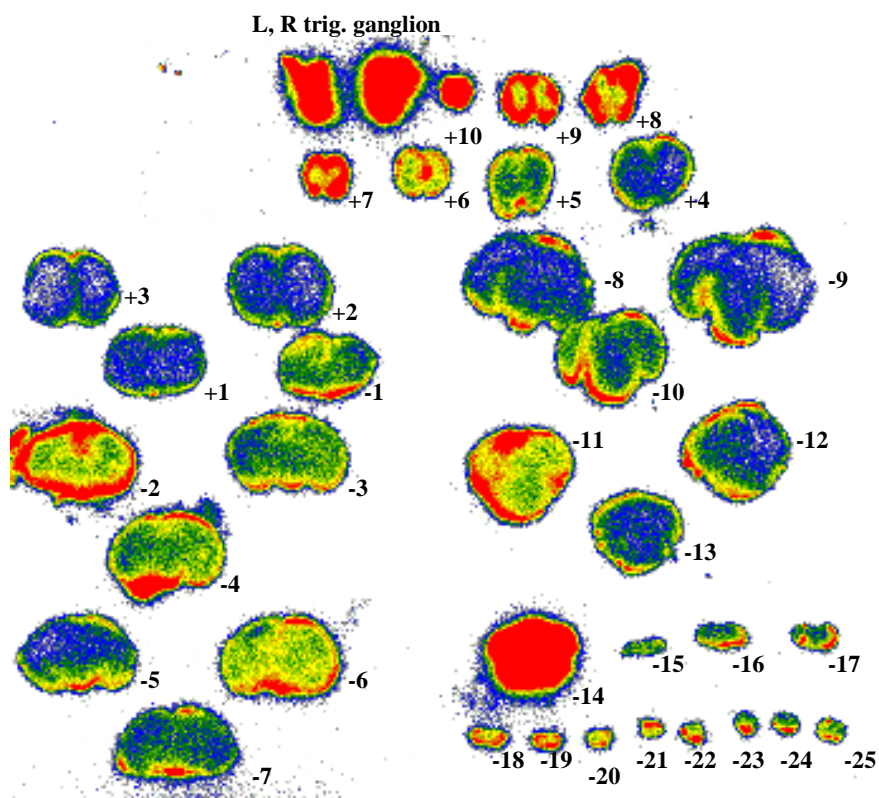

Image intensity range: 425-1,471

**Figure D13: Rat 34**

Intranasal Delivery of Oxytocin (labeled and unlabeled)  
with 1% Avicel Mucoadhesive

Delivered 51 ul over 14 min; 45 uCi, 0.4 mg, 397 nmol

Down on 11/20/07, developed on 12/20/07.

Slices measured from Bregma.

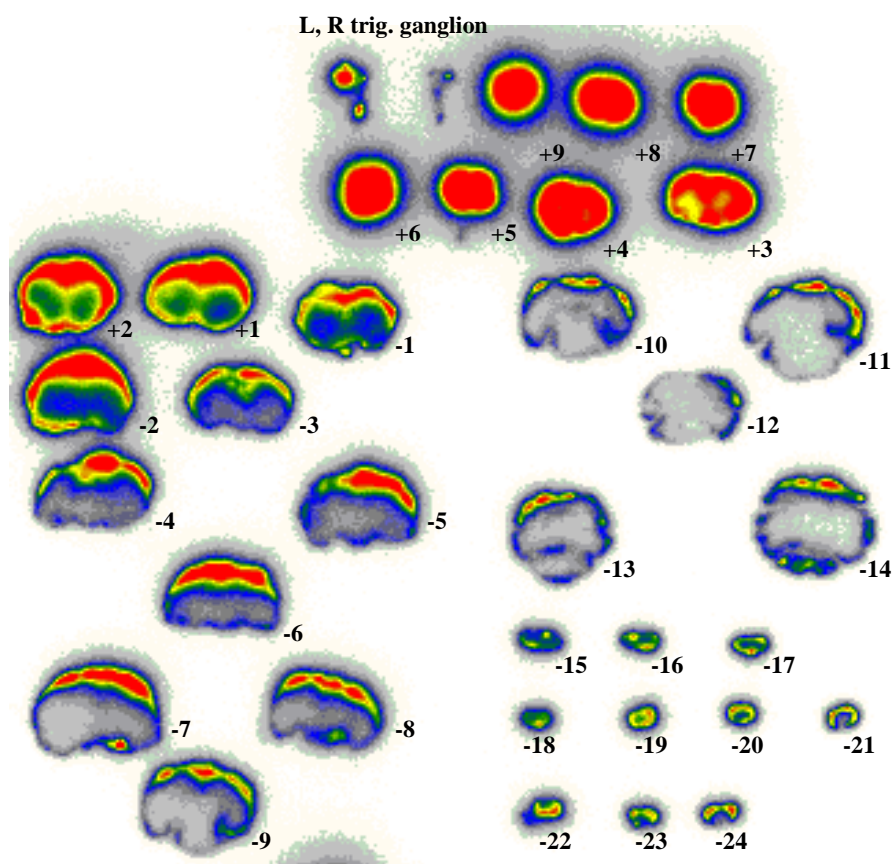

Image intensity range: 425-1,471

**Figure D14: Rat 35**

Intranasal Delivery of Oxytocin (labeled and unlabeled)  
with 1% Avicel Mucoadhesive

Delivered 51 ul over 14 min; 45 uCi, 0.4 mg, 397 nmol

Down on 11/20/07, developed on 12/20/07.

Slices measured from Bregma.

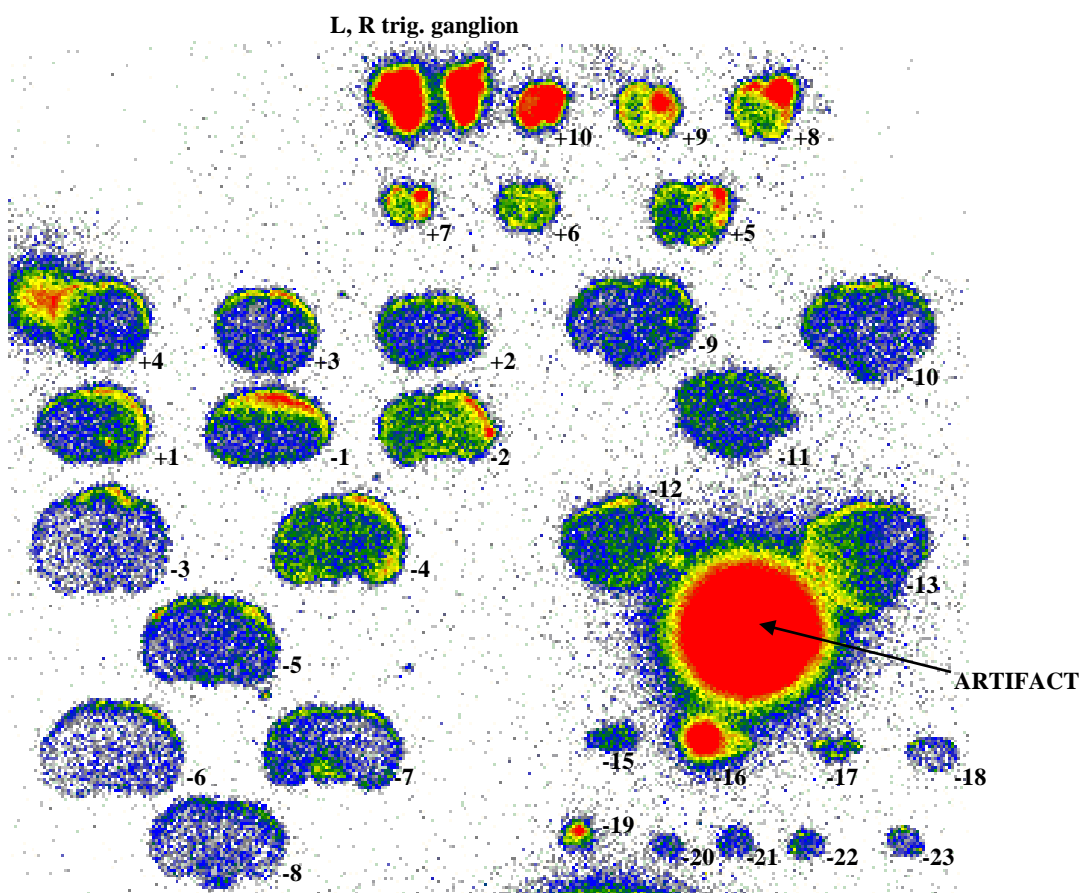

Image intensity range: 425-1,471

**Figure D15: Rat 36**

Intranasal Delivery of Oxytocin (labeled and unlabeled)  
with 1% Avicel Mucoadhesive

Delivered 49 ul over 14 min; 45 uCi, 0.4 mg, 397 nmol

Down on 11/26/07, developed on 01/04/08.

Slices measured from Bregma.

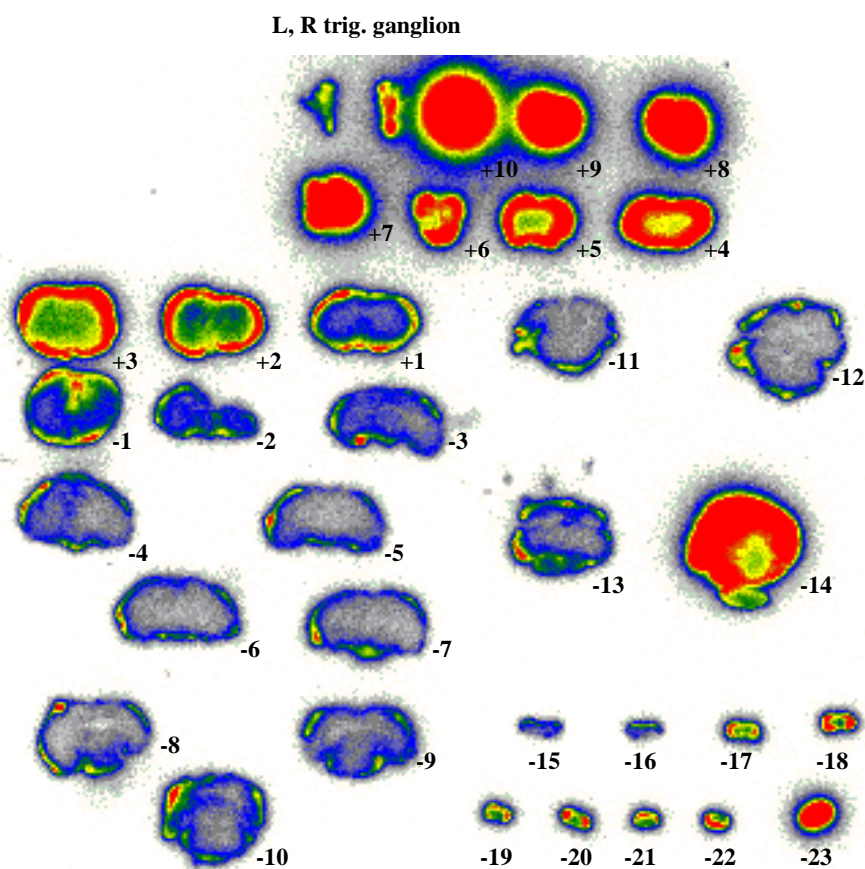

Image intensity range: 419-7,503

**Figure D16: Rat 37**

Intranasal Delivery of Oxytocin (labeled and unlabeled)  
with 1% Avicel Mucoadhesive

Delivered 49 ul over 14 min; 45 uCi, 0.4 mg, 397 nmol

Down on 11/26/07, developed on 01/04/08.

Slices measured from Bregma.

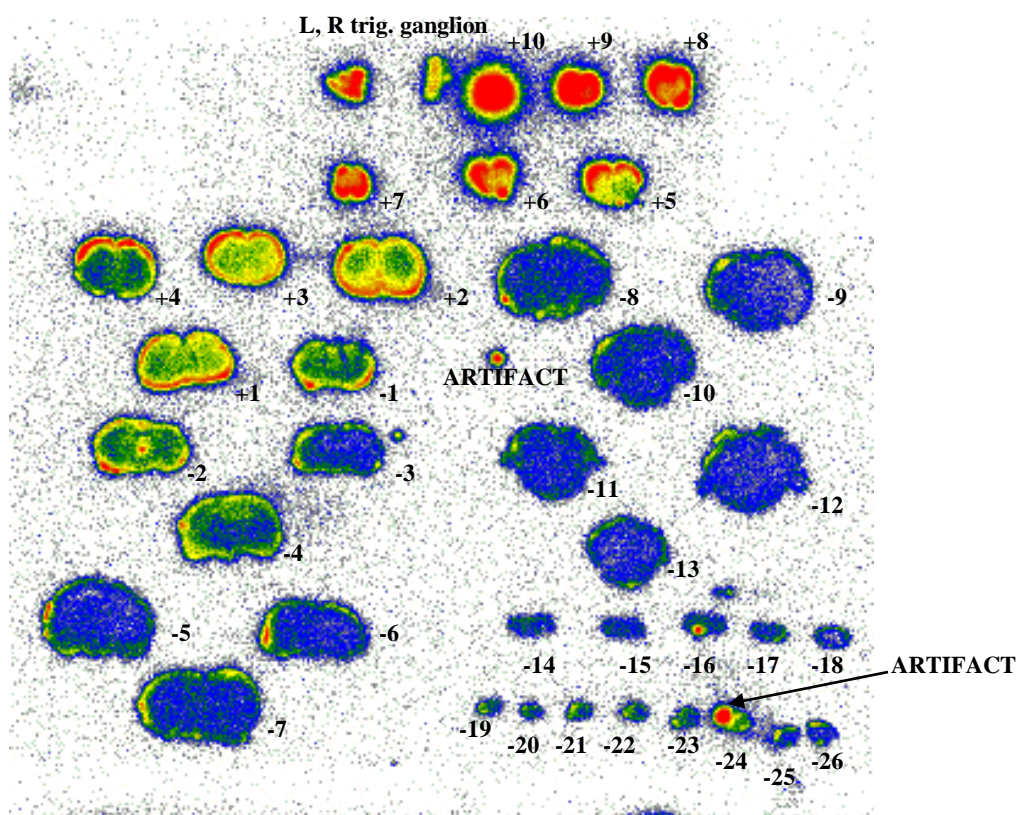

Image intensity range: 335-3,054

## **Appendix E – Coronal Rat Brain Slices**

### **Figures**

Figure E01: Brain Slice 01

Figure E02: Brain Slice 02

Figure E03: Brain Slice 03

Figure E04: Brain Slice 04

Figure E05: Brain Slice 05

Figure E06: Brain Slice 06

Figure E07: Lateral Brain Bisection

# Figure E01: 1<sup>st</sup> Slice

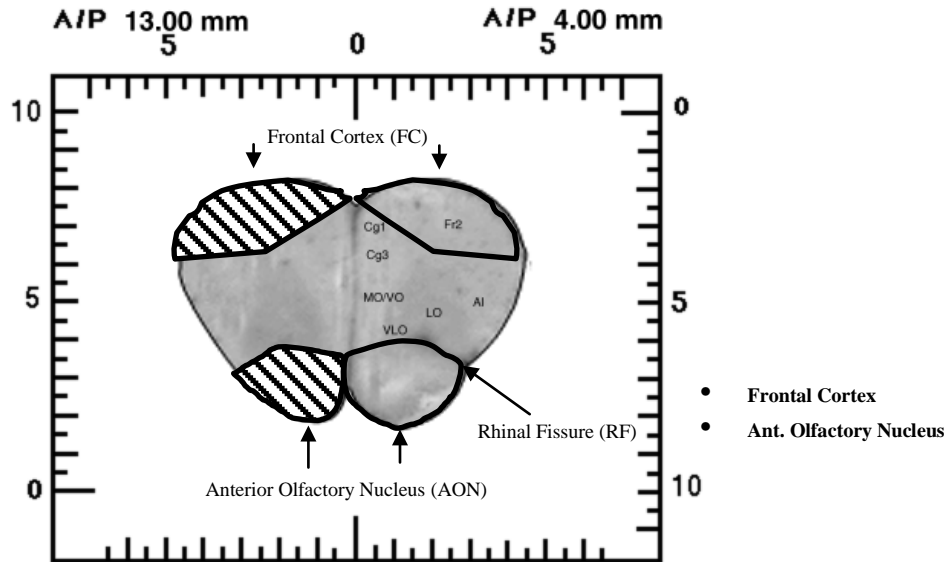

# Figure E02: 2<sup>nd</sup> Slice

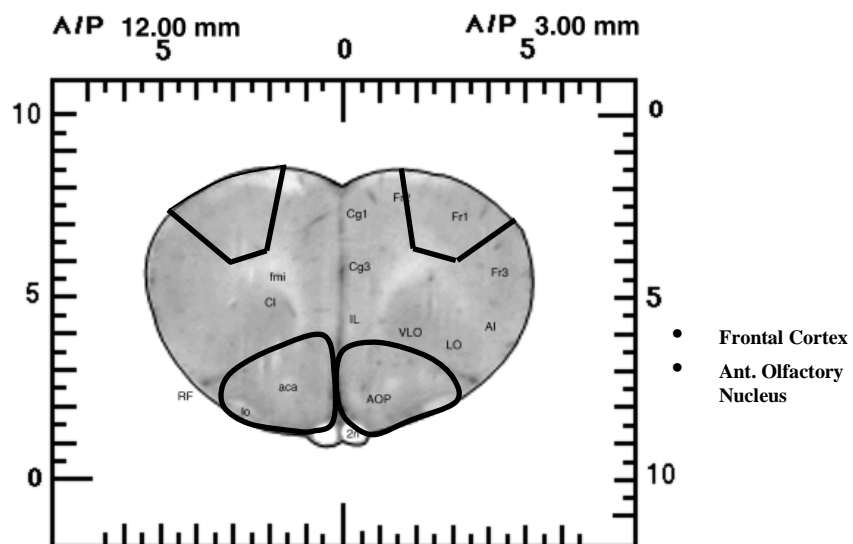



# Figure E03: 3<sup>rd</sup> Slice

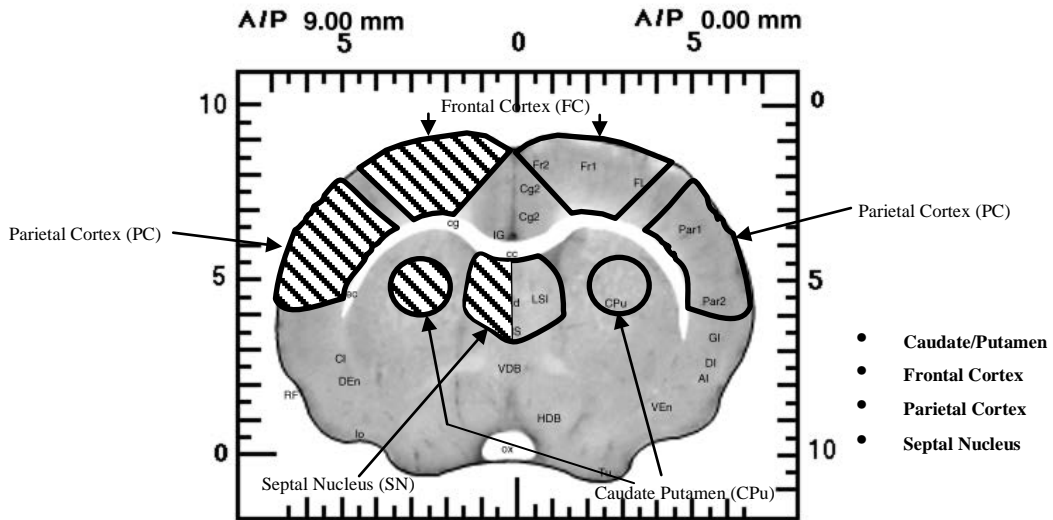

# Figure E04: 4<sup>th</sup> Slice

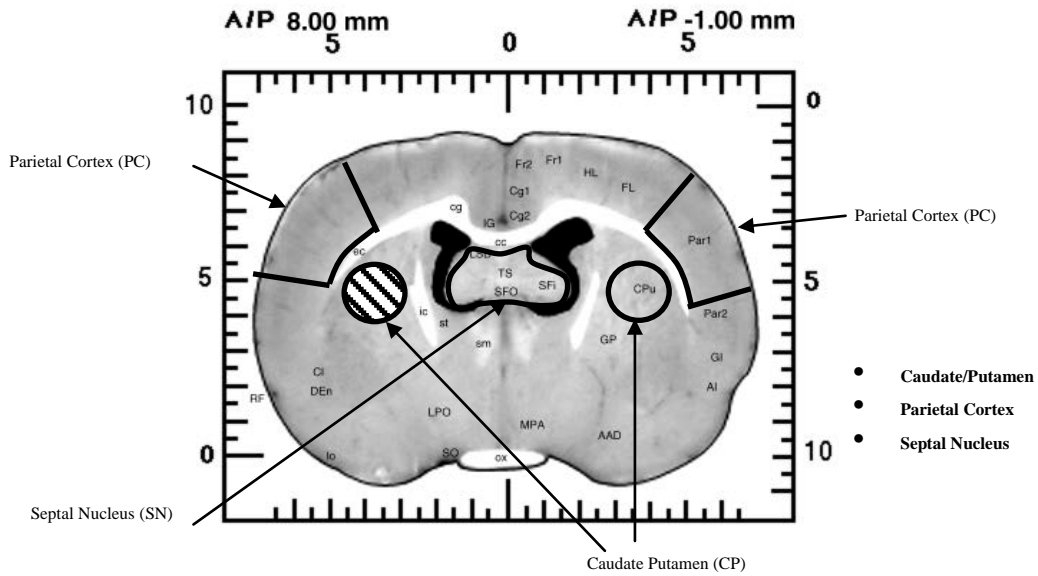

# Figure E05: 5<sup>th</sup> Slice

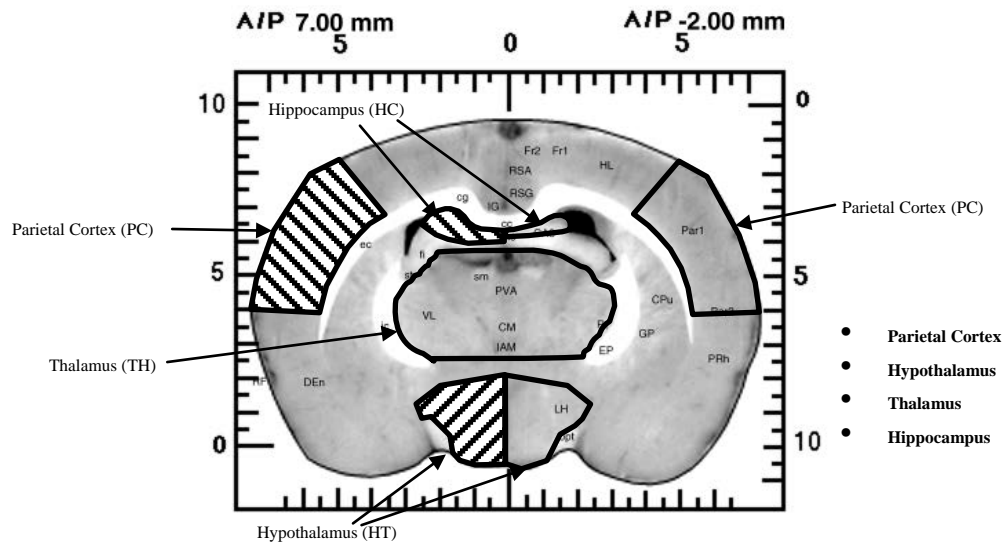

# Figure E06: 6<sup>th</sup> Slice

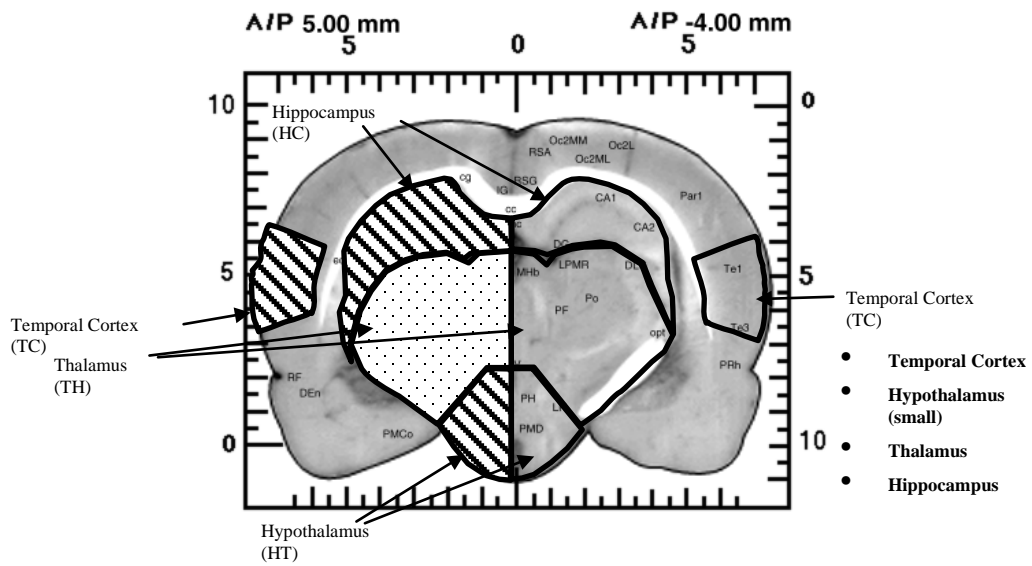

# Figure E07: Rat Brain Bisection

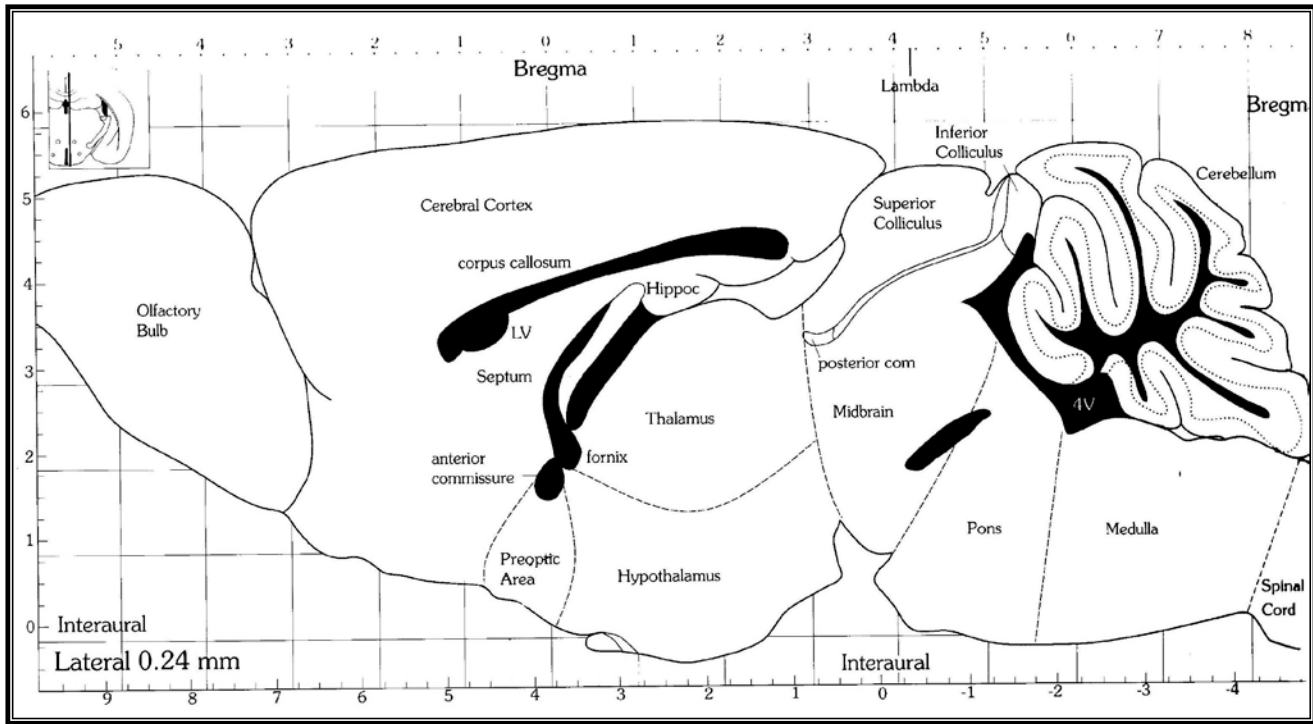

**Pre-Clinical Pharmacokinetic Distribution Study in Rats for  
Intranasal Administration of Oxytocin**

**PART 2**

## Executive Summary

- ◆ Intranasal oxytocin rapidly reached the central nervous system with significant concentrations in the trigeminal nerve branches and trigeminal ganglion.
- ◆ Higher concentrations in olfactory and trigeminal structures confirmed delivery along these pathways.
- ◆ In animals receiving 0.04 mg oxytocin, the trigeminal ganglion was found to have an average concentration of 5.3 nM while the three major branches, maxillary, mandibular, and ophthalmic, were found to have concentrations of 7.5 nM, 8.9 nM, and 9.3 nM respectively. The average concentration of olfactory bulb samples was 3.6 nM.
- ◆ Concentrations achieved in the CNS after a single intranasal treatment with 0.04 mg (0.03  $\mu$ mol) oxytocin were high enough to be expected to activate high affinity oxytocin receptors in all brain and trigeminal tissues. Low affinity oxytocin receptors are not expected to be activated in any of the collected tissues as the nM tissue concentrations are not believed to be high enough.
- ◆ In animals receiving 0.004 mg oxytocin, the trigeminal ganglion was found to have an average concentration of 1.3 nM while the three major branches, maxillary, mandibular, and ophthalmic, were found to have oxytocin concentrations of 1.8 nM, 2.6 nM, and 2.1 nM respectively. The average concentration of olfactory bulb samples was 0.6 nM.
- ◆ Concentrations achieved in the CNS after a single intranasal treatment with 0.004 mg (0.003  $\mu$ mol) oxytocin were high enough to expect activation of high affinity oxytocin receptors in the trigeminal ganglion and all three trigeminal branches. However, concentrations were not high enough to expect activation of high affinity receptors in the brain or spinal cord.
- ◆ When comparing 0.4 mg, 0.04 mg, and 0.004 mg doses, concentrations achieved in collected tissues followed the expected dose-response trend when graphed logarithmically. Some tissues, including brain and trigeminal system samples from the 0.04 mg dose were not as high as expected while others were higher than expected. This may be in part due to the decreased viscosity of the dosing solution which may have decreased the efficiency of delivery. Similar trends were seen in the trigeminal system of 0.004 mg animals, but not as markedly in the brain concentrations of these animals.

## ♦ Table of Contents

|                                                                          |       |
|--------------------------------------------------------------------------|-------|
| <b>Executive Summary</b>                                                 | 2     |
| <b>Table of Contents</b>                                                 | 3-4   |
| <b>Purpose of Study</b>                                                  | 5     |
| <b>Compounds and Dosing Calculations</b>                                 | 5-6   |
| <b>General Procedures</b>                                                | 7-13  |
| Formulation of Dose Solution                                             | 7     |
| Animals                                                                  | 7     |
| Anesthesia                                                               | 7-8   |
| Intranasal Delivery of <sup>125</sup> I-Oxytocin                         | 8-9   |
| Transcardial Perfusion                                                   | 9     |
| Brain Dissection                                                         | 9-11  |
| Body Dissection                                                          | 11-12 |
| Tissue Counting                                                          | 12    |
| Data Analysis and Calculations                                           | 12-13 |
| <b>Results</b>                                                           | 13-20 |
| Table 01: Intranasal Delivery of 0.04 mg Oxytocin Data Summary           | 16    |
| Table 02: Intranasal Delivery of 0.004 mg Oxytocin Data Summary          | 17    |
| Table 03: Comparison of 0.4 mg, 0.04 mg and 0.004 mg Intranasal Oxytocin | 18    |
| Table 04: Comparison of 0.4 mg, 0.04 mg and 0.004 mg Intranasal Oxytocin | 19    |
| Figure 01: Dose Response Curve                                           | 20    |
| <b>Appendices</b>                                                        |       |
| <b>Appendix A – 0.04 mg Intranasal Oxytocin Data</b>                     | 21-31 |
| Table A01: Intranasal Oxytocin Rat 42 Data                               | 22    |
| Table A02: Intranasal Oxytocin Rat 43 Data                               | 23    |
| Table A03: Intranasal Oxytocin Rat 46 Data                               | 24    |
| Table A04: Intranasal Oxytocin Rat 47 Data                               | 25    |
| Table A05: Intranasal Oxytocin Rat 50 Data                               | 26    |
| Table A06: Intranasal Oxytocin Rat 51 Data                               | 27    |
| Table A07: Intranasal Oxytocin Rat 54 Data                               | 28    |
| Table A08: Intranasal Oxytocin Rat 55 Data                               | 29    |
| Table A09: Intranasal Oxytocin Rat 58 Data                               | 30    |
| Table A10: Intranasal Oxytocin Rat 59 Data                               | 31    |

**Appendix B – 0.004 mg Intranasal Oxytocin Data** 32-42

|                                                               |    |
|---------------------------------------------------------------|----|
| Table B01: Intranasal Oxytocin with Mucoadhesive, Rat 44 Data | 33 |
| Table B02: Intranasal Oxytocin with Mucoadhesive, Rat 45 Data | 34 |
| Table B03: Intranasal Oxytocin with Mucoadhesive, Rat 48 Data | 35 |
| Table B04: Intranasal Oxytocin with Mucoadhesive, Rat 49 Data | 36 |
| Table B05: Intranasal Oxytocin with Mucoadhesive, Rat 52 Data | 37 |
| Table B06: Intranasal Oxytocin with Mucoadhesive, Rat 53 Data | 38 |
| Table B07: Intranasal Oxytocin with Mucoadhesive, Rat 56 Data | 39 |
| Table B08: Intranasal Oxytocin with Mucoadhesive, Rat 57 Data | 40 |
| Table B09: Intranasal Oxytocin with Mucoadhesive, Rat 60 Data | 41 |
| Table B10: Intranasal Oxytocin with Mucoadhesive, Rat 61 Data | 42 |

**Appendix C – Coronal Rat Brain Slices** 43-50

|                                     |    |
|-------------------------------------|----|
| Figure C01: Brain Slice 01          | 44 |
| Figure C02: Brain Slice 02          | 45 |
| Figure C03: Brain Slice 03          | 46 |
| Figure C04: Brain Slice 04          | 47 |
| Figure C05: Brain Slice 05          | 48 |
| Figure C06: Brain Slice 06          | 49 |
| Figure C07: Lateral Brain Bisection | 50 |

## **Purpose of Study**

The purpose of this study was to quantify the concentration and distribution of oxytocin in the central nervous system (CNS) and peripheral tissues after intranasal delivery to anesthetized rats. We examined the distribution of two different doses of oxytocin (0.04 mg and 0.004 mg) at 30 min after the onset of intranasal delivery. In both cases, a combination of <sup>125</sup>I-labeled oxytocin and unlabeled oxytocin was delivered. At 30 min after the onset of delivery, each animal was perfused with saline while under anesthesia followed by 4% paraformaldehyde and tissues were dissected. The concentration of oxytocin in the tissues was quantified using gamma counting.

## **Compounds and Dosing Calculations**

Oxytocin was custom <sup>125</sup>I-radiolabeled by Perkin Elmer Life Sciences (3/10/08, Lot CIS31083) with an initial concentration of 1.0 mCi/ml and a specific activity of 2200 Ci/mmol. Radiolabeled oxytocin was prepared in a buffer containing 10 mM sodium phosphate (pH 7.4), 2.7 mM potassium phosphate, 137 mM sodium chloride, and 8.3% acetonitrile, 0.03% TFA. Using the molecular weight of oxytocin (1007.19 g/mol) the hot solution was calculated to contain 2184.3 uCi/ug at synthesis.

Cold oxytocin was purchased from Phoenix Pharmaceuticals (Acetate salt, ≥ 97%), product number 051-01, lot 425984. The product was stored at 0-5°C until ready for use.

The desired volume for intranasal delivery to anesthetized rats was 48 ul. Dosing calculations were used to determine the concentration necessary to achieve the desired volume to dose two rats (48 ul each), aliquot 3 standards (3 by 3 ul each), and provide 5 ul extra to for evaporation. The total prepared solution contained ~110 ul for each experimental day (enough for two rats). Using information provided by Perkin Elmer, the volume and concentration of hot and cold oxytocin in each dosing solution was calculated with a desired dose of 41 uCi and either 0.04 mg or 0.004 mg oxytocin.

*Sample Calculations: <sup>125</sup>I-Oxytocin: Rat 42*

To reach the desired 0.04 mg oxytocin while maintaining a 48 ul dose solution, the cold oxytocin solution was prepared at 20 mg/ml.

Volume hot to deliver=desired uCi/ (uCi/ul at synthesis)/ (decay rate of <sup>125</sup>I\*(date of delivery - date of synthesis))

Delivery date 03/13/08:

Volume hot to deliver=41 uCi/1.0 uCi/ul/ (e<sup>-0.01155\*3 days</sup>) =42.45 ul

Volume cold to deliver=desired mg-(ul hot\*(uCi/ul at synthesis)/ (uCi/ug at synthesis)/1000) / (cold ug/ul)\*1000

Delivery date 3/13/08:

Volume cold to deliver= (0.04 mg-(42.45 uL\*1.0 uCi/ul /2,184.3 uCi/ug /1000))/20 ug/ul \*1000 =2.0 ul

Total volume to deliver= 42.45 + 2.0 = 44.44 ul



Volume hot to make dose solution = total ul desired / total ul to deliver \* ul hot to deliver

Delivery date 3/13/08:

Volume hot to make dose solution =  $(44.44 + 9 + 5) \text{ ul} / 44.44 \text{ ul} * 42.45 \text{ ul} = 55.82 \text{ ul}$

Volume cold to make dose solution = total ul desired / total ul to deliver \* ul cold in to deliver.

Delivery date 3/13/08:

Volume cold to make dose solution:  $(44.44 + 9 + 5) \text{ ul} / 44.44 \text{ ul} * 2.0 \text{ ul} = 2.63 \text{ ul}$

Total volume to make dose solution (dose, standards, evaporation) =  $55.82 + 2.63 = 58.44 \text{ ul}$

*Sample Calculations: <sup>125</sup>I-Oxytocin, Rat 44*

To reach the desired 0.004 mg oxytocin while maintaining a 48 ul dose solution, the cold oxytocin solution was prepared at 5 mg/ml.

Volume hot to deliver = desired uCi / (uCi/ul at synthesis) / (decay rate of <sup>125</sup>I \* (date of delivery - date of synthesis))

Delivery date 03/17/08:

Volume hot to deliver =  $41 \text{ uCi} / 1.0 \text{ uCi/ul} / (e^{(-0.01155 * 7 \text{ days})}) = 44.45 \text{ ul}$

Volume cold to deliver = desired mg - (ul hot \* (uCi/ul at synthesis) / (uCi/ug at synthesis) / 1000) / (cold ug/ul) \* 1000

Delivery date 03/17/08:

Volume cold to deliver =  $(0.004 \text{ mg} - (44.45 \text{ uL} * 1.0 \text{ uCi/ul} / 2,184.3 \text{ uCi/ug} / 1000)) / 5 \text{ ug/ul} * 1000 = 0.8 \text{ ul}$

Total volume to deliver =  $44.45 + 0.8 = 45.25 \text{ ul}$

Volume hot to make dose solution = total ul desired / total ul in dose solution \* ul hot in dose solution

Delivery date 03/17/08:

Volume hot to make dose solution =  $(45.25 + 9 + 5) \text{ ul} / 45.25 \text{ ul} * 44.45 \text{ ul} = 58.21 \text{ ul}$

Volume cold to make dose solution = total ul desired / total ul in dose solution \* ul cold in dose solution.

Delivery date 03/17/08:

Volume cold to make dose solution:  $(45.25 + 9 + 5) \text{ ul} / 45.25 \text{ ul} * 0.8 \text{ ul} = 1.04 \text{ ul}$

Total volume to make dose solution (dose, standards, evaporation) =  $58.21 + 1.04 = 59.25 \text{ ul}$

## **General Procedures**

Throughout experimental procedures, strict precautions were followed to prevent radiation exposure and contamination of animal tissues, surgical tools, and equipment. Geiger counters were placed at each work station to continuously screen tools, workspace, and staff. Personal protective equipment including double layered gloves, lab coats, eye protection, masks, and bouffant caps was worn at all times. Lead impregnated shields were used to minimize exposure to radiation. Radioactive monitoring badges were also worn by staff throughout experimental procedures to quantify exposure.

### ***Formulation of Dose Solution***

To make the cold solution, a volume of 1X phosphate buffered saline (PBS) was prepared by diluting 10X PBS (Sigma Aldrich) into sterile water. Oxytocin was then weighed and added to the 1X PBS, making a solution of either 20.0 mg/ml or 5.0 mg/ml oxytocin in 1X PBS, pH 7. The solution was vortexed to ensure proper mixing.

According to dosing calculations, the corresponding volumes of hot and cold oxytocin were then added to pre-labeled 1.5 ml microcentrifuge tubes. The tubes were then capped, covered in parafilm for extra precaution, and placed in lead-lined storage containers, and stored at -20°C until ready for use.

On the day of delivery, the dosing solution was brought to room temperature on the bench top. All dosing solutions were vortexed prior to delivery.

### ***Animals***

Adult male Sprague Dawley rats (N=20, 275-300 g) were used throughout the study. Animals were group-housed in the Regions Hospital Animal Care Facility with free access to food and water. Animals were kept on a 12 h light cycle. All experimental procedures were approved by the Animal Care and Use Committee at HealthPartners Research Foundation.

There were two experimental groups of animals: group I received 0.04 mg oxytocin and was analyzed with gamma counting, group II received 0.004 mg oxytocin and was analyzed with gamma counting.

### ***Anesthesia***

Prior to anesthesia, each rat was weighed.

- a. An anesthesia cocktail was made containing 3 parts ketamine, 3 parts xylazine, and 1 part acepromazine. A separate syringe containing pentobarbital was also drawn.
- b. A 1-cc syringe fitted with a 22G, 1 in needle was assembled.
- c. Full, half, and quarter doses of the ketamine cocktail were calculated according to the animal's weight at 0.5 ml/kg. A half dose of pentobarbital was also calculated at 50 mg/kg for use just prior to exsanguination.
- d. A full dose of the ketamine cocktail was drawn into the syringe for injection.
- e. The rat was placed ventral side down in the middle of a small hand towel.
- f. The towel was wrapped around the animal's head and shoulders to restrain it.

- g. With the animal restrained, a large flap of skin was gently pinched above the animal's right rear limb.
- h. The needle was inserted subcutaneously into the skin fold at a 45° angle.
- i. The plunger was pulled back to check for air or a blood flash.
- j. If no blood was present, the anesthesia was pushed into the skin fold.
- k. The rat was removed from the hand towel and placed in a holding cage.
- l. The time and volume of anesthesia was noted on the animal's data sheet.
- m. The animal's anesthesia level was assessed by pinching of the hind paw or tail. If the animal solicited a reflex, a ½ or ¼ dose booster was administered as necessary.
- n. If the animal required an additional booster during drug delivery, the booster was given subcutaneously above the animal's left hind limb as follows:
  - i. A skin flap above the hip joint was gently pinched and the needle inserted into the fold.
  - ii. The plunger was pulled back to check for a blood flash.
  - iii. If none was present, the booster was injected.
  - iv. The time and dose were noted on the data sheet.

### ***Intranasal Delivery of <sup>125</sup>I-Oxytocin***

Anesthesia was monitored throughout the procedure. The animal's reflex was assessed by pinching the hind paw or tail while stabilizing the head to prevent movement. Quarter and half dose boosters of the ketamine cocktail were delivered subcutaneously as needed. Intranasal delivery was performed as follows:

- a. The fully anesthetized rat was placed on its back on a heating pad in a metal surgical tray inside a fume hood. A properly lubricated rectal probe was inserted to monitor and maintain the rat's core temperature at 37°C.
- b. Two 2"x2" gauze pads were rolled into a pillow and taped to secure. The pillow was then placed under the rat's head to maintain the position of the head so that the underside of the neck and mouth were horizontal.
- c. A cotton swab was covered with parafilm.
- d. A lead impregnated shield was placed in front of the surgical tray to protect the experimenter from radiation.
- e. The dose solution, pipette, 30 ul with filter pipette tips, and waste receptacle were arranged behind the shield for easy access.
- f. A series of three 3 ul standards were aspirated from the microcentrifuge tube containing the dosing solution and expelled into pre-weighed and labeled gamma counting tubes.
- g. A 6 ul drop was loaded into the pipette behind the shield.
- h. The cotton swab covered in parafilm was used to occlude one naris completely. The flat part of the swab was pushed gently against the naris at approximately a 45° angle to prevent airflow.
- i. Holding the pipette at a 45° angle, the 6 ul drop was slowly expelled, forming a drop at the end of the tip.
- j. The drop was lowered onto the open naris to be inhaled and the cotton swab was removed from the opposite naris.
- k. The drop was inhaled.
- l. The time and volume of the drop were recorded on the animal's data sheet.

- m. After two minutes, the alternate naris was occluded and a 6 ul drop was administered in the same fashion to the open naris. The cotton swab was removed and the time was noted.
- n. A drop was administered as described above every two minutes to alternating nares until a total of 8 drops were delivered (4 to each naris) for a total of ~48 ul.
- o. Each drop was noted on the data sheet as well as any details regarding the animal or success of delivery.

### ***Transcardial Perfusion***

- a. Eight minutes prior to exsanguination, a half dose of pentobarbital was administered as an intraperitoneal injection to the anesthetized rat to ensure surgical level of sedation.
- b. Two min before the desired sacrifice time, the rectal probe and heating pad were removed from the metal surgical tray. While still on its back, labeling tape was used to secure the animal's front limbs to the pan. The back of the pan was elevated slightly to allow blood to flow away from the animal.
- c. A toothed forceps was used to grasp the skin/fur covering the sternum. A cut was made through the animal's skin, exposing the sternum.
- d. The sternum was clamped with a hemostat. The rib cage was cut open laterally, exposing the diaphragm.
- e. The diaphragm was cut to expose the pleural cavity.
- f. Surgical scissors were used to cut up the sides of the ribcage toward the armpits of the animal, creating a 'V' shaped incision exposing the heart.
- g. The hemostat holding the sternum was taped above the animal's head to hold the cavity open.
- h. The heart was stabilized using the blunt forceps while a 1 cc-syringe with 20 G, 1" sharp needle was inserted into the left ventricle. Approximately 0.2 cc of blood was removed and placed into a pre-weighed tube for gamma counting.
- i. A small cut was made in the left ventricle using a spring scissors and an 18 G blunt needle attached to an extension set filled with 60 cc of saline was inserted through the left ventricle and into the aorta.
- j. A large bulldog clamp was placed just above the heart on the aorta, securing the blunt needle in place.
- k. The animal was perfused with 60 ml of saline followed by 360 ml of 4% paraformaldehyde at a rate of 15 ml/min.

### ***Brain Dissection***

Immediately after collection, each tissue sample was placed into a pre-labeled and pre-weighed gamma tube for quantification.

- a. The skin and muscle around the neck were cut with a scalpel just above the shoulder blades. A large curved scissors was used to decapitate the animal, cutting dorsal to ventral to avoid contamination from the trachea and esophagus.
- b. A midline incision was made on the dorsal side of the skull. The skin was peeled back up to the eyes.
- c. A straight hemostat was used to peel the bone away from the top half of the brain. The top of the brain was exposed all the way to the olfactory bulbs.

- d. Using a spring scissors and curved forceps, dorsal dura was collected off the surface of the brain.
- e. The head was inverted and the brain was removed using a small spatula to free it from the cavity. The posterior optic nerve and trigeminal nerves were trimmed close to the brain using a spring scissors. The brain was then inverted and placed into a clean Petri dish.
- f. The basilar artery and circle of Willis was carefully collected from the ventral side of the brain with sharp forceps. The brain was then covered with a kim-wipe moistened with 1X PBS, and placed aside for later dissection.
- g. The ventral dura was collected from the skull cavity by scraping a forceps on the walls. The collected dura was placed into a pre-weighed gamma tube.
- h. The ophthalmic branch of the trigeminal nerve was visualized on the inside of the skull. The scalpel was then used to carefully slice through the skull on the caudal side of the nerve, creating a vertical slice in the wall of the skull running parallel to the nerve.
- i. A small hemostat was used to chip away the wall of the skull just up to the ophthalmic nerve.
- j. A small spatula was run under the nerve and the skull, freeing the nerve from the skull wall. The nerve was then trimmed from the cavity and placed in the appropriate tube.
- k. Once both sides of the ophthalmic nerve had been collected, the small hemostat was again used to chip away the bottom portion of the skull walls on both sides.
- l. When the muscle layers were visible, the small spatula was used to tease out the mandibular nerve on both sides. Care was taken to retrieve a large portion by following the nerve into the lower jaw and chipping bone away with a hemostat if necessary.
- m. Finally, the maxillary nerve and trigeminal ganglion were collected. The ganglion were removed with a curved forceps, trimming them from the maxillary segment just in front of the branching using a spring scissors.
- n. The maxillary segment was collected by first removing any residual dura from the area using a forceps. Then, the curved forceps was used to gently pull the maxillary nerve while a spring scissors was inserted into the cavity as far as possible and used to snip the nerve from the remaining portion.
- o. Once all of the nerve segments had been collected, the head was set aside and covered with a moist kim-wipe for later dissection.
- p. The brain was retrieved and uncovered for dissection.
- q. The brain was placed dorsal side down in a coronal brain matrix.
- r. A razor blade was inserted at the optic chiasm. Additional blades were placed every 2 mm outward from the optic chiasm. Slices were generated from the midbrain to the tip of the forebrain, resulting in 6 slices. The blades were removed and inverted for dissection.
- s. The olfactory bulbs were retrieved from the brain matrix and trimmed of any excess tissue. The bulbs were rostral to the first slice.
- t. Tissues were dissected from corresponding slices (1-6) as diagrammed in Appendix E.

- u. The remaining brain tissue in the matrix was retrieved and the upper cervical spinal cord was dissected and placed in the appropriate tube.
- v. The brain segment was then bisected along the midline. Following figure 7 in Appendix E, the midbrain, pons, and medulla were collected by scoring each half straight down from the inferior colliculus. This marked the midbrain. Another score was made under the point in the fourth ventricle, marking the medulla. The cerebellum was peeled off and placed in the corresponding tube. If necessary, remaining cortex was also removed. Following the previously made scores, the midbrain, pons, and medulla were dissected and placed into pre-weighed tubes.
- w. Next, the head was retrieved and the ventral side of the neck was cut anteriorly. The skin was peeled back exposing the neck muscles. The superficial nodes were dissected, cleared of connective tissues, and placed in pre-weighed gamma tubes.
- x. The deep cervical nodes were located, dissected, cleared of connective tissue, and placed into pre-weighed tubes.
- y. The thyroid was collected by gently peeling it off of the trachea with a forceps.
- z. A single edge razor blade was then used to bisect the skull along the midline. The olfactory and respiratory epitheliums were collected from the cavity by scoring the edges and removing with a forceps. Care was taken to avoid the nasal septum.

### ***Body Dissection***

- a. The rat was placed on its stomach and a superficial incision was made down the length of the animal from shoulders to hips, following the spine.
- b. The skin was peeled away from the underlying tissue on both sides to expose the shoulder blades.
- c. The axillary nodes in the connective tissue surrounding the shoulders were dissected, cleared of connective tissue, and placed in pre-weighed tubes.
- d. A piece of right deltoid muscle was dissected, approximately 3 mm square, and placed into a pre-weighed gamma tube.
- e. The muscles overlying the spine were scored with a scalpel. A small hemostat was inserted into the spinal column, above the cord, at the point of decapitation. The hemostat was clamped on the overlying vertebrae and tissues. The vertebrae and tissues were chipped away using an upward motion. The hemostat was inserted into the column repetitively, chipping away small pieces of the column each time, until the entire length of the cord was exposed.
- f. When the spinal cord was fully exposed, a small spatula was used to loosen the cord from the spinal cavity. The spinal cord was then removed using a forceps and placed into a petri dish.
- g. The intact spinal cord was cut into lower cervical, thoracic, and lumbar portions. The dura was peeled off of each section using a forceps and small spatula. All sections and the dura were then placed in respective pre-weighed tubes.
- h. The rat was flipped onto its back and the sternum was cut vertically to further expose the abdominal and pleural cavities.
- i. 3 mm square samples of the following tissues were dissected and placed into pre-weighed gamma counting tubes.
  - 1. liver, right superficial lobe
  - 2. left kidney, tip

3. right lung, top lobe
4. spleen, tip
5. heart, apex
- j. Urine was removed from the bladder using a 1cc syringe and transferred to a pre-weighed tube.
- k. A section of the renal artery feeding the animal's left kidney was collected.
- l. A section of both the trachea and the esophagus were collected at the point of decapitation and placed in respective tubes.

### ***Tissue Counting***

The pre-weighed gamma tubes containing samples were reweighed to determine tissue weight. Tissue samples were then counted using a COBRA II Auto-Gamma Counter. The counter was normalized weekly to ensure a counting efficiency at or above 80%. The efficiency was then noted on each animal's data sheet. The samples were counted under a standard <sup>125</sup>I protocol with 5 min count time and an elevator position of 1. Immediately prior to sample counting, a background protocol was run to measure the current background noise. The average background at time of counting was then automatically subtracted by the gamma counter from the measured counts, a step previously calculated in the animal's EXCEL data sheet. In analysis of gamma counting results, any value outside two standard deviations of the mean for each tissue was considered an outlier and removed from the data set. Outliers are denoted on an animal's data sheet by an 'X'.

### ***Data Analysis and Calculations***

Sample calculations for rat 42 were completed by hand and imported to Microsoft EXCEL®. All values were then auto-calculated using identical spreadsheets and double checked for accuracy.

#### ***Sample Calculations***

Specific activity from Perkin Elmer Specs = (uCi delivered\*decay on day counted/decay on day delivered)/estimated nmol delivered \* (2.22\*10<sup>6</sup> DPM/uCi) \* counting efficiency (CPM/DPM) \* (10<sup>-6</sup>) = specific activity (cpm/fmol)

Example: Rat 42 = (41.00 uCi \* 0.9659 / 0.9659) / 39.71 nmol \* (2.22 \* 10<sup>6</sup> DPM/uCi) \* 0.83 \* (10<sup>-6</sup>) = 1.90 CPM/fmol

Specific Activity from Standards = 1/ (average volume of standards (ul) \* concentration of dose solution (ug/ul)/oxytocin molecular weight (ug/umol)/ average of standards (cpm-background)\*10<sup>9</sup> fmol/umol) = specific activity (CPM/fmol)

Example: Rat 42 = 1/ (3 ul \*0.9 ug/ul /1007ug/umol /3,520,338 cpm \* 10<sup>9</sup> fmol/umol) = 1.31 CPM/fmol

nM tissue concentration (from Amersham Specs) = (CPM)/ (specific activity from specs in cpm/fmol)/ (tissue weight) \*10<sup>3</sup> ml/L\*10<sup>-6</sup> fmol/nmol = nM tissue concentration

Example: Rat 42, Olfactory bulbs= (380 CPM)/ (1.90 CPM/fmol)/ (0.09985 g)/10<sup>3</sup> = 2.00 nM

nM tissue concentration (from standards) = (CPM)/tissue weight/ (specific activity from standards in CPM /fmol) \*10<sup>3</sup> ml/L\*10<sup>-6</sup> fmol/nmol = nM tissue concentration

Example: Rat 42, Olfactory bulbs= (380 CPM)/ (1.31 CPM/fmol)/ (0.09985 g)/10<sup>3</sup>= 2.90 nM

## **Results**

### ***Intranasal Delivery of 0.04 mg <sup>125</sup>I-Oxytocin***

Intranasal oxytocin successfully reaches the central nervous system with significant concentrations in the trigeminal nerve branches and trigeminal ganglion. The trigeminal ganglion was found to contain an average concentration of 5.3 nM while the three major branches, maxillary, mandibular, and ophthalmic, were found to contain average concentrations of 7.5 nM, 8.9 nM, and 9.3 nM respectively (Table 01). The average concentration of olfactory bulb samples was found to be 3.6 nM (Table 01). The high concentrations in these tissues confirm delivery to the brain along the olfactory and trigeminal nerve pathways. The highest delivery of oxytocin in the brain was observed in the frontal cortex (3.0 nM), septal nucleus (1.6 nM), anterior olfactory nucleus (1.5 nM), and hypothalamus (1.4 nM, Table 01). The lowest concentration of oxytocin in the brain was found in the thalamus at 1.0 nM (Table 01). The dorsal and ventral dura/meninges were found to contain concentrations of 4.0 and 2.9 nM oxytocin, respectively (Table 01). As the K<sub>d</sub> for high affinity oxytocin receptors is ~1 nM and the K<sub>d</sub> for low affinity oxytocin receptors is ~ 50 nM, this data suggests that at the dose administered, high affinity oxytocin receptors would be activated in all CNS tissues and low affinity receptors would not be activated.

The average concentration of oxytocin in the respiratory epithelium was found to be 58,080 nM (Table 01) leading to effective delivery along the trigeminal nerve pathway. The average concentration of oxytocin found in the upper cervical spinal cord was 1.8 nM (Table 01). The remaining spinal cord segments, lower cervical, thoracic, and lumbar, were found to contain concentrations of 0.7 nM, 0.6 nM, and 0.7 nM respectively (Table 01). With the exception of the upper cervical segment, these concentrations are not high enough to activate high affinity oxytocin receptors. Although our measurements were made 30 minutes after initiating intranasal treatment and 16 minutes after ending intranasal treatment, intranasal oxytocin likely reaches the trigeminal nerves within a minute or two following administration to the nasal cavity and reaches the brain within 10 minutes. Thirty minutes after initiation of intranasal delivery, the concentration of radiolabel found in the blood was 8.46 nM (Table 01). As the half-life of oxytocin in the blood is about 10 minutes, a significant portion of this radiolabel may represent degraded oxytocin.

### ***Intranasal Delivery of 0.004 mg <sup>125</sup>I-Oxytocin***

Oxytocin was again successfully delivered to the brain using intranasal delivery at the 0.004 mg dose but not in good yield. The average concentration found in olfactory bulb samples was 0.6 nM (Table 02). The trigeminal ganglion was found to contain an average concentration of 1.3 nM while the three major branches, maxillary, mandibular, and ophthalmic, were found to contain average concentrations of 1.8 nM, 2.6 nM, and 2.1 nM respectively (Table 02). All brain concentrations achieved at the 0.004 mg dose were found to be essentially equal, at 0.2 to 0.3 nM (Table 02). Concentration of oxytocin found in the respiratory epithelium averaged 2,728 nM



(Table 02). At this dose, high affinity oxytocin receptors would be activated in the trigeminal system only. The concentrations achieved in all brain structures are too low to activate even high affinity oxytocin receptors. The average concentration of oxytocin found in the upper cervical spinal cord was 0.4 nM (Table 02). The remaining spinal cord segments, lower cervical, thoracic, and lumbar, were found to contain average concentrations of 0.2 nM, 0.1 nM, and 0.1 nM respectively (Table 02). Again, these concentrations are too low to be expected to activate receptors. At 30 min after the onset of delivery, blood samples were found to average 2.42 nM oxytocin (Table 02).

### ***Comparison of 0.4 mg (previous study), 0.04 mg, and 0.004 mg Intranasal Oxytocin***

Table 3 was created to aid in side-by-side comparisons of the three doses explored to date: 0.4 mg, 0.04 mg, and 0.004 mg. As evident from Table 3, some tissues exhibit the expected ten fold decrease from dose to dose, while others did not. Of notable variation is the olfactory epithelium. At the 0.4 mg dose, oxytocin concentrations reached 4,112 nM (Table 3). However, the concentrations achieved at the 0.04 mg and 0.004 mg dose were both 92 nM (Table 3). Due to the decreased mg delivered, the dosing solution of the 0.04 mg dose was markedly less viscous than the 0.4 mg dose. This may attribute to the lower than expected nM concentrations of the 0.04 mg and 0.004 mg doses as a less viscous solution may not adhere to the walls of the nasal cavity as well, thereby decreasing the efficiency of delivery to the nasal mucosa. In addition, the company that previously <sup>125</sup>I-radiolabeled oxytocin is no longer in operation and a new company was used for this phase of the study. This may affect the legitimacy of comparisons to the 0.4 mg group.

To determine whether there is a dose dependant relationship of oxytocin when delivered intranasally, the ratios of the three different doses were compared to each other. In previous studies, rats were given 0.4 mg oxytocin intranasally using the same methods described above. Based on the amounts given which vary by three orders of magnitude (0.4 mg, 0.04 mg, and 0.004 mg) we expect to see tissue concentrations that vary by factors of ten as well. However, this was not always the case. These values were expressed as percentages for easy comparison and can be seen in Table 04.

When comparing the results of the 0.04 mg dose to previous results for the 0.4 mg dose, the blood sample for the 0.04 mg dose, found to be 8.46 nM (Table 03), is higher than expected at 13.8% of the 0.4 mg dose (Table 04). Despite a higher than expected blood concentration, almost all of the trigeminal and brain tissues were found to contain lower than expected oxytocin concentrations. The 0.04 mg trigeminal ganglion tissues were found to contain only 2% of the 0.4 mg tissues while all three branches contained only 3% (Table 04). With the exception of the olfactory bulbs, frontal cortex, and cerebellum tissues, all brain structures exhibited nM concentrations less than 10% of the nM concentrations achieved in the 0.4 mg dose (Table 04). The respiratory and olfactory epitheliums were also found to contain less than 10% of the 0.4 mg dose (Table 04). Again, this may be a result of the decreased viscosity of the dosing solution, varied preparation of the radiolabel by a different vendor, or a combination of the two.

When comparing the results of the 0.004 mg dose to previous results for the 0.4 mg dose, the blood sample for the 0.004 mg dose, found to be 2.42 nM (Table 03), is higher than expected at 3.94% of the 0.4 mg dose (Table 04). The concentration of oxytocin in the trigeminal ganglion

and three branches was again found to be lower than the anticipated 1% of the 0.4 mg dose (Table 04). The respiratory epithelium is lower than expected at 0.4% while the olfactory epithelium is higher than expected at 2.25% (Table 04). These results, again, may be attributed to the decreased viscosity of the dosing solution when compared to the 0.4 mg dose or the difference in vendor for <sup>125</sup>I-radiolabeling. With the exception of three brain tissues found to be slightly higher in concentration than expected (olfactory bulbs, midbrain, and cerebellum), many of the 0.004 mg brain tissues were found to contain nM concentrations at or near expected values when compared to the 0.4 mg dose (Table 04). Systemic tissues, however, were found to be higher than anticipated expected (Table 04).

Lastly, the nM tissue concentrations of animals dosed with 0.04 mg and 0.004 mg intranasal oxytocin were compared. The oxytocin concentration in the blood of animals receiving 0.004 mg was found to be nearly 3 times higher than anticipated (Table 04). Additionally, every brain, trigeminal, and systemic tissue was also found to be higher in concentration than expected when comparing the 0.004 mg animals to the 0.04 mg animals (Table 04). This may indicate less efficient delivery in the 0.04 mg animals or may suggest a non-linear response of mg dosed to nM tissue concentrations achieved.

For a visual comparison, 10 tissues of interest were selected and the data was compiled into a chart to evaluate the dose-response relationship of intranasal oxytocin. As seen in Figure 01, the concentration of oxytocin found in the ten tissues of interest increases as the mg dose of intranasal oxytocin increases. As the doses varied markedly and only included three values (0.4 mg, 0.04 mg, and 0.004 mg), a logarithmic scale was chosen.

**Table 01: Intranasal Delivery of 0.04 mg Oxytocin Data Summary**

| Anesthesia                      |                | Ketamine         | Ketamine         | Ketamine         | Ketamine         | Ketamine         | Ketamine         | Ketamine         | Ketamine         | Ketamine         |           |
|---------------------------------|----------------|------------------|------------------|------------------|------------------|------------------|------------------|------------------|------------------|------------------|-----------|
| mg oxytocin delivered           |                | 0.040            | 0.040            | 0.040            | 0.040            | 0.040            | 0.040            | 0.040            | 0.040            | 0.040            |           |
| nmol oxytocin delivered         |                | 39.71            | 39.71            | 39.72            | 39.72            | 39.71            | 39.71            | 39.72            | 39.71            | 39.72            |           |
| uCi delivered                   |                | 41.00            | 41.00            | 41.00            | 41.00            | 41.00            | 41.00            | 41.00            | 41.00            | 41.00            |           |
| uL delivered                    |                | 44.44            | 44.44            | 46.97            | 46.97            | 41.00            | 50.19            | 54.25            | 54.25            | 55.47            |           |
| Delivery time                   |                | 14:01            | 14:04            | 14:00            | 14:00            | 14:02            | 14:00            | 14:03            | 14:00            | 14:00            |           |
| Sac time                        |                | 31:01            | 30:57            | 30:36            | 30:46            | 31:47            | 30:07            | 30:58            | 31:10            | 30:45            |           |
| Notes                           |                | Steady Breathing | Steady Breathing | Steady Breathing | Steady Breathing | Steady Breathing | Steady Breathing | Steady Breathing | Steady Breathing | Steady Breathing |           |
|                                 | Mean SE        | Rat 42           | Rat 43           | Rat 46           | Rat 47           | Rat 50           | Rat 51           | Rat 54           | Rat 55           | Rat 58           | Rat 59    |
| Tissue Description              | nM             | nM               | nM               | nM               | nM               | nM               | nM               | nM               | nM               | nM               | nM        |
| Blood Sample (30:00)            | 8.46 ±0.4      | 6.69             | 6.96             | 9.78             | 9.17             | 6.96             | 10.69            | 9.34             | 7.72             | 8.73             | 8.58      |
| Respiratory Epithelium          | 58,080 ±10,300 | 92,619.55        | 84,524.54        | 120,227.43       | 28,334.01        | 37,096.52        | 56,141.25        | 16,183.08        | 49,278.01        | 62,972.48        | 33,422.30 |
| Olfactory Epithelium            | 92 ±27         | 23.03            | X                | 74.57 X          | X                | 210.17           | 47.35            | 207.11           | 46.37            | 110.47           | 17.93     |
| Trigeminal Ganglion             | 5.3 ±0.9       | 7.49             | 9.19             | X                | 2.65             | 7.12             | 8.18             | 2.37             | 3.52             | 3.24             | 4.12      |
| Maxillary Nerve                 | 7.5 ±0.9       | 8.75             | 6.20             | 11.00            | X                | 8.85             | 11.91            | 4.47             | 4.51             | 6.50             | 5.64      |
| Mandibular Nerve                | 8.9 ±1.2       | 6.62             | 14.62            | X                | X                | 12.55            | 9.40             | 8.93             | 5.78             | 4.90             | 8.18      |
| Ophthalmic Nerve                | 9.3 ±1.2       | 5.86             | 10.58            | 10.82            | X                | 7.61             | 9.95             | 9.54             | 4.79             | 6.98             | 17.25     |
| Olfactory Bulbs                 | 3.6 ±0.4       | 2.90             | 4.33             | 3.30             | 2.90             | 5.74             | 2.48             | 1.36             | 2.90             | 4.96             | 5.43      |
| Anterior Olfactory Nucleus      | 1.5 ±0.1       | 1.24             | X                | 1.57             | X                | 1.81             | 1.60             | 0.93             | 1.45             | 1.89             | 1.23      |
| Frontal Cortex                  | 3.0 ±0.7       | 1.36             | 5.45             | 1.44             | 6.38             | 2.17             | 2.12             | 1.12             | 1.85             | 6.17             | 1.58      |
| Caudate/Putamen                 | 1.1 ±0.1       | X                | 1.35             | 1.49             | X                | 1.48             | 0.83             | 0.59             | 0.65             | 1.22             | 0.97      |
| Septal Nucleus                  | 1.6 ±0.3       | 3.58             | 1.12             | 1.41             | 3.33             | 1.37             | 1.38             | 0.76             | 1.12             | 0.79             | 0.96      |
| Parietal Cortex                 | 1.2 ±0.1       | 0.99             | X                | 1.31             | X                | 1.32             | 1.47             | 0.87             | 1.09             | X                | 1.10      |
| Hippocampus                     | 1.1 ±0.1       | 1.27             | 0.99             | 1.16             | 1.41             | 1.21             | 1.21             | 1.04             | 0.86             | X                | 0.88      |
| Thalamus                        | 1.0 ±0.1       | 0.82             | 1.12             | 1.04             | X                | 1.25             | 1.15             | 0.72             | 1.00             | 1.20             | 0.72      |
| Hypothalamus                    | 1.4 ±0.2       | 0.83             | 2.29             | 2.15             | 2.00             | 1.26             | 1.77             | 0.79             | 1.14             | 0.90             | 1.21      |
| Midbrain                        | 1.1 ±0.1       | 0.97             | 1.52             | 1.36             | X                | 1.03             | 1.67             | 0.80             | 0.96             | 1.00             | 0.89      |
| Pons                            | 1.1 ±0.1       | 1.07             | X                | 1.55             | X                | 1.15             | 1.35             | 0.74             | 0.98             | 0.95             | 0.97      |
| Medulla                         | 1.1 ±0.1       | 1.19             | X                | 1.30             | X                | 1.02             | 1.49             | 0.69             | 1.10             | 1.12             | 1.14      |
| Cerebellum                      | 1.1 ±0.0       | 1.03             | X                | 1.29             | X                | 1.07             | X                | 0.90             | 1.08             | 1.10             | 1.00      |
| Dorsal Dura                     | 25 ±4.8        | 13.34            | X                | X                | X                | 25.46            | 34.34            | 7.10             | 16.25            | 39.87            | 36.46     |
| Ventral Dura                    | 14 ±1.3        | 12.52            | X                | 15.49            | 12.55            | 14.42            | X                | 8.23             | 16.10            | 21.24            | 15.26     |
| Spinal Dura                     | 2.8 ±0.6       | 1.22             | 1.50             | 5.86             | 3.93             | 2.69             | 3.43             | 5.88             | 1.68             | 0.00             | 1.88      |
| Upper Cervical Spinal Cord      | 1.8 ±0.1       | 1.87             | X                | 2.33             | 2.02             | 1.17             | 1.98             | 2.50             | 1.55             | 1.61             | 1.45      |
| Lower Cervical Spinal Cord      | 0.7 ±0.1       | 0.65             | 0.61             | 1.23             | 0.97             | 0.76             | 0.97             | 0.58             | 0.59             | 0.44             | 0.54      |
| Thoracic Spinal Cord            | 0.6 ±0.0       | 0.58             | 0.60             | 0.79             | 0.76             | 0.59             | 0.77             | 0.59             | 0.48             | 0.38             | 0.38      |
| Lumbar Spinal Cord              | 0.7 ±0.0       | 0.60             | 0.58             | 0.84             | 0.76             | 0.58             | 0.88             | 0.55             | 0.50             | 0.83             | 0.54      |
| Circle of Willis/Basilar Artery | 7.0 ±1.7       | -                | -                | -                | -                | -                | -                | 2.84             | 10.64            | 5.83             | 8.62      |
| Renal Artery                    | 2.0 ±0.2       | -                | -                | -                | -                | -                | -                | 2.37             | 1.43             | 2.41             | 1.81      |
| Superficial Nodes (2)           | 32 ±7          | 72.96            | 18.25            | 40.24            | 70.25            | 31.16            | 24.30            | 18.60            | 10.64            | 22.29            | 14.88     |
| Cervical Nodes (2)              | 13 ±2.2        | X                | 8.66             | 25.59            | 6.79             | 11.18            | 18.68            | 18.59            | 6.72             | 6.87             | 11.98     |
| Axillary Nodes (2)              | 1.6 ±0.1       | 1.36             | 1.29             | 2.03             | 2.03             | 1.32             | 1.89             | X                | 1.45             | 1.35             | 1.81      |
| Thyroid                         | 80 ±10         | X                | 44.78            | 64.39            | 70.76            | 54.13            | 116.86           | 69.92            | 137.25           | 75.81            | 86.96     |
| Muscle (R, deltoid)             | 1.4 ±0.1       | 1.15             | 1.46             | 1.79             | 1.72             | 1.32             | X                | 1.47             | 1.06             | 1.23             | 1.32      |
| Liver (R, superficial lobe)     | 1.1 ±0.1       | 0.82             | 0.80             | 1.39             | X                | 0.84             | 1.63             | 0.75             | 1.26             | 1.11             | 1.28      |
| Kidney (L, tip)                 | 2.2 ±0.3       | X                | 1.28             | 3.26             | X                | 3.33             | 2.45             | 1.88             | 1.83             | 1.23             | 1.93      |
| Lung (R, top lobe)              | 2.1 ±0.2       | X                | 2.99             | 2.93             | 1.86             | 1.54             | 2.07             | 1.26             | 2.59             | 1.41             | 2.28      |
| Trachea (near cut-off)          | 3.1 ±0.5       | 1.45             | 1.97             | 3.41             | 4.06             | 2.08             | 4.47             | 1.97             | 2.28             | 5.84             | X         |
| Esophagus (near cut-off)        | 2.3 ±0.2       | 1.93             | 1.85             | 2.71             | X                | 2.49             | X                | 2.50             | 1.63             | 2.74             | 2.62      |
| Spleen (tip)                    | 1.9 ±0.2       | 2.61             | 0.86             | 1.64             | 1.82             | 1.27             | X                | 2.10             | 3.34             | 1.96             | 1.87      |
| Heart                           | 1.1 ±0.1       | 1.11             | 1.46             | 1.10             | X                | 0.99             | 1.39             | 1.14             | 1.17             | 0.77             | 0.66      |
| Urine (fill to line of tube)    | 4.2 ±0.6       | 4.23             | 0.91             | 3.60             | 2.65             | 5.43             | 7.72             | 6.54             | 2.98             | 5.31             | 2.92      |
| CPM/fmol                        | 1.4 ±0.0       | 1.31             | 1.28             | 1.38             | 1.38             | 1.41             | 1.41             | 1.36             | 1.35             | 1.39             | 1.39      |

**LEGEND**  
X : Outlier Removed from Data  
- : Tissue Not Collected

**Table 02: Intranasal Delivery of 0.004 mg Oxytocin Data Summary**

| Anesthesia                      |       |      | Ketamine         | Ketamine         | Ketamine         | Ketamine         | Ketamine         | Ketamine         | Ketamine         | Ketamine         | Ketamine         | Ketamine         | Ketamine         | Ketamine         | Ketamine         |
|---------------------------------|-------|------|------------------|------------------|------------------|------------------|------------------|------------------|------------------|------------------|------------------|------------------|------------------|------------------|------------------|
| mg oxytocin delivered           |       |      | 0.004            | 0.004            | 0.004            | 0.004            | 0.004            | 0.004            | 0.004            | 0.004            | 0.004            | 0.004            | 0.004            | 0.004            | 0.004            |
| nmol oxytocin delivered         |       |      | 3.97             | 3.97             | 3.97             | 3.97             | 3.97             | 3.97             | 3.97             | 3.97             | 3.97             | 3.97             | 3.97             | 3.97             | 3.97             |
| uCi delivered                   |       |      | 41.00            | 41.00            | 41.00            | 41.00            | 41.00            | 41.00            | 41.00            | 41.00            | 41.00            | 41.00            | 41.00            | 41.00            | 41.00            |
| uL delivered                    |       |      | 45.25            | 45.25            | 46.82            | 46.82            | 50.69            | 50.69            | 53.66            | 53.66            | 54.89            | 54.89            | 54.89            | 54.89            | 54.89            |
| Delivery time                   |       |      | 14:02            | 14:00            | 13:58            | 14:06            | 14:02            | 14:05            | 14:01            | 13:59            | 14:00            | 14:00            | 14:00            | 14:00            | 14:00            |
| Sac time                        |       |      | 31:05            | 31:00            | 31:02            | 30:35            | 31:04            | 30:44            | 30:46            | 31:01            | 30:37            | 30:30            |                  |                  |                  |
| Notes                           |       |      | Steady Breathing | Steady Breathing | Steady Breathing | Steady Breathing | Steady Breathing | Steady Breathing | Steady Breathing | Steady Breathing | Steady Breathing | Steady Breathing | Steady Breathing | Steady Breathing | Steady Breathing |
|                                 | Mean  | SE   | Rat 44           | Rat 45           | Rat 48           | Rat 49           | Rat 52           | Rat 53           | Rat 56           | Rat 57           | Rat 60           | Rat 61           |                  |                  |                  |
| Tissue Description              |       | nM   | nM               | nM               | nM               | nM               | nM               | nM               | nM               | nM               | nM               | nM               |                  |                  |                  |
| Blood Sample (30:00)            | 2.4   | ±0.2 | 1.89             | 1.76             | 1.45             | 1.47             | 2.48             | 2.36             | 2.65             | 3.31             | 3.57             | 3.29             |                  |                  |                  |
| Respiratory Epithelium          | 2,728 | ±233 | 2,687.13         | X                | 3,467.79         | 2,158.62         | 3,499.31         | 1,750.26         | 3,229.23         | X                | 2,137.42         | 2,897.85         |                  |                  |                  |
| Olfactory Epithelium            | 92    | ±36  | 80.81            | 232.64           | 15.31            | 11.77            | 276.84           | 182.52           | 11.95            | 10.76            | X                | 8.21             |                  |                  |                  |
| Trigeminal Ganglion             | 1.3   | ±0.2 | 1.75             | 1.44             | 2.15             | 1.39             | 1.82             | 1.05             | 0.98             | 0.70             | 0.65             | 0.62             |                  |                  |                  |
| Maxillary Nerve                 | 1.8   | ±0.4 | 1.07             | 3.23             | 0.70             | 4.19             | 3.07             | 1.15             | 1.47             | 1.42             | 1.12             | 0.99             |                  |                  |                  |
| Mandibular Nerve                | 2.6   | ±0.3 | 2.80             | 2.19             | X                | 1.25             | 3.43             | 1.54             | 3.94             | 2.13             | 2.10             | 4.04             |                  |                  |                  |
| Ophthalmic Nerve                | 2.1   | ±0.3 | 1.59             | 3.96             | 0.58             | 2.02             | X                | 2.63             | 2.08             | X                | 2.08             | 2.04             |                  |                  |                  |
| Olfactory Bulbs                 | 0.6   | ±0.0 | 0.57             | 0.66             | 0.65             | 0.45             | 0.63             | 0.54             | 0.82             | 0.71             | X                | X                |                  |                  |                  |
| Anterior Olfactory Nucleus      | 0.3   | ±0.0 | 0.27             | 0.56             | 0.21             | 0.19             | 0.31             | 0.27             | 0.46             | 0.33             | 0.33             | X                |                  |                  |                  |
| Frontal Cortex                  | 0.3   | ±0.0 | 0.30             | 0.32             | 0.24             | 0.20             | 0.35             | 0.34             | X                | 0.34             | 0.27             | 0.38             |                  |                  |                  |
| Caudate/Putamen                 | 0.3   | ±0.0 | 0.35             | 0.18             | 0.11             | 0.15             | 0.27             | 0.22             | 0.39             | 0.26             | 0.26             | 0.38             |                  |                  |                  |
| Septal Nucleus                  | 0.2   | ±0.0 | 0.29             | 0.21             | 0.09             | 0.14             | 0.23             | 0.17             | 0.22             | 0.20             | 0.25             | 0.17             |                  |                  |                  |
| Parietal Cortex                 | 0.3   | ±0.0 | 0.29             | 0.24             | 0.21             | 0.19             | 0.30             | 0.23             | 0.37             | X                | 0.25             | 0.31             |                  |                  |                  |
| Hippocampus                     | 0.2   | ±0.0 | 0.19             | 0.16             | 0.15             | 0.12             | 0.23             | 0.18             | 0.21             | 0.23             | 0.20             | 0.19             |                  |                  |                  |
| Thalamus                        | 0.2   | ±0.0 | 0.23             | 0.15             | 0.13             | 0.14             | 0.22             | 0.16             | 0.18             | 0.21             | 0.22             | 0.20             |                  |                  |                  |
| Hypothalamus                    | 0.2   | ±0.0 | X                | 0.22             | 0.17             | 0.20             | 0.22             | 0.19             | 0.21             | 0.23             | 0.28             | 0.22             |                  |                  |                  |
| Midbrain                        | 0.2   | ±0.0 | 0.38             | 0.19             | 0.18             | 0.15             | 0.28             | 0.21             | 0.25             | 0.20             | 0.25             | 0.22             |                  |                  |                  |
| Pons                            | 0.2   | ±0.0 | X                | 0.19             | 0.22             | 0.18             | 0.26             | 0.25             | 0.20             | 0.32             | 0.30             | 0.22             |                  |                  |                  |
| Medulla                         | 0.3   | ±0.0 | X                | 0.21             | 0.20             | 0.20             | 0.34             | 0.27             | 0.23             | 0.25             | 0.36             | 0.25             |                  |                  |                  |
| Cerebellum                      | 0.3   | ±0.0 | 0.37             | 0.19             | 0.15             | 0.17             | 0.34             | 0.28             | 0.25             | 0.24             | 0.33             | 0.24             |                  |                  |                  |
| Dorsal Dura                     | 4.0   | ±0.7 | 7.71             | 6.36             | 0.76             | 2.93             | 3.13             | 4.31             | 4.40             | 6.34             | 1.83             | 1.81             |                  |                  |                  |
| Ventral Dura                    | 2.9   | ±0.6 | 1.63             | 1.69             | 1.14             | 1.51             | 4.78             | 5.05             | 6.44             | 2.19             | 2.22             | 2.44             |                  |                  |                  |
| Spinal Dura                     | 1.0   | ±0.3 | 1.23             | 0.56             | 0.59             | 0.44             | 0.49             | 2.56             | 0.56             | 0.70             | 2.58             | 0.76             |                  |                  |                  |
| Upper Cervical Spinal Cord      | 0.4   | ±0.1 | 0.66             | 0.19             | 0.24             | 0.27             | 0.26             | 0.67             | 0.37             | 0.55             | 0.30             | 0.27             |                  |                  |                  |
| Lower Cervical Spinal Cord      | 0.2   | ±0.0 | 0.18             | 0.12             | 0.09             | 0.11             | 0.16             | 0.23             | 0.14             | 0.17             | 0.23             | 0.16             |                  |                  |                  |
| Thoracic Spinal Cord            | 0.1   | ±0.0 | 0.14             | 0.12             | 0.08             | 0.11             | 0.13             | 0.13             | 0.10             | 0.13             | 0.16             | 0.12             |                  |                  |                  |
| Lumbar Spinal Cord              | 0.1   | ±0.0 | 0.16             | 0.11             | 0.12             | 0.09             | 0.14             | 0.14             | 0.12             | 0.15             | 0.17             | 0.16             |                  |                  |                  |
| Circle of Willis/Basilar Artery | 1.2   | ±0.2 | -                | -                | -                | -                | 1.09             | 1.30             | 2.29             | 0.65             | 1.26             | 0.86             |                  |                  |                  |
| Renal Artery                    | 0.6   | ±0.1 | -                | -                | -                | -                | 0.36             | 0.72             | 0.62             | 0.79             | X                | 0.51             |                  |                  |                  |
| Superficial Nodes (2)           | 3.8   | ±0.7 | X                | 6.68             | 4.09             | 6.35             | 4.53             | 3.21             | 1.26             | 4.56             | 2.22             | 1.31             |                  |                  |                  |
| Cervical Nodes (2)              | 3.0   | ±0.5 | 5.48             | 2.97             | 2.08             | 3.21             | 1.16             | 3.17             | 5.60             | 0.91             | 1.78             | 3.23             |                  |                  |                  |
| Axillary Nodes (2)              | 0.6   | ±0.1 | 0.32             | 0.37             | 0.38             | 0.35             | 0.43             | 0.60             | 0.79             | 0.58             | 0.98             | 0.76             |                  |                  |                  |
| Thyroid                         | 29    | ±5   | 16.23            | 12.68            | 14.95            | 11.87            | 24.01            | 26.84            | 35.63            | 40.36            | 51.47            | 53.85            |                  |                  |                  |
| Muscle (R, deltoid)             | 0.3   | ±0.0 | 0.27             | 0.27             | 0.25             | 0.32             | 0.35             | X                | 0.44             | 0.29             | X                | 0.39             |                  |                  |                  |
| Liver (R, superficial lobe)     | 0.6   | ±0.1 | 0.49             | 0.32             | 0.30             | 0.20             | 0.22             | 1.49             | 0.44             | 0.34             | 1.39             | 0.57             |                  |                  |                  |
| Kidney (L, tip)                 | 0.6   | ±0.1 | 0.58             | 0.57             | 0.24             | 0.60             | 0.32             | 0.55             | 0.64             | 0.77             | 0.68             | 0.57             |                  |                  |                  |
| Lung (R, top lobe)              | 0.6   | ±0.1 | X                | 0.40             | 0.40             | 0.30             | 0.56             | 0.43             | 0.64             | 1.23             | 0.79             | 0.96             |                  |                  |                  |
| Trachea (near cut-off)          | 0.7   | ±0.1 | 0.52             | 0.69             | 0.37             | 0.41             | 1.05             | 0.83             | 0.71             | 0.84             | 1.00             | X                |                  |                  |                  |
| Esophagus (near cut-off)        | 0.9   | ±0.1 | 0.98             | 0.91             | X                | 0.40             | 0.91             | 0.79             | 0.73             | 0.63             | 1.31             | 1.67             |                  |                  |                  |
| Spleen (tip)                    | 0.6   | ±0.1 | 0.64             | 0.47             | 0.23             | 0.34             | 0.48             | 0.76             | 0.80             | 0.89             | X                | 0.84             |                  |                  |                  |
| Heart                           | 0.3   | ±0.0 | X                | 0.26             | 0.23             | 0.19             | 0.29             | 0.40             | 0.25             | 0.27             | X                | 0.29             |                  |                  |                  |
| Urine (fill to line of tube)    | 1.1   | ±0.2 | 1.47             | 0.70             | 0.49             | 0.97             | 0.66             | 1.09             | X                | 1.93             | 1.41             | 1.00             |                  |                  |                  |
| CPM/fmol                        | 12.7  | ±0.1 | 13.09            | 13.09            | 12.53            | 12.53            | 12.82            | 12.82            | 12.75            | 12.64            | 12.57            | 12.52            |                  |                  |                  |

**LEGEND**  
 X : Outlier Removed from Data  
 - : Tissue Not Collected

**Table 03: Intranasal Delivery of 0.4 mg, 0.04 mg and 0.004 mg Oxytocin**

| Tissue Description              | 0.4 mg Oxytocin<br>(Previous Data) |         | 0.04 mg<br>Oxytocin |         | 0.004 mg<br>Oxytocin |      |
|---------------------------------|------------------------------------|---------|---------------------|---------|----------------------|------|
|                                 | Mean                               | SE      | Mean                | SE      | Mean                 | SE   |
|                                 | nM                                 |         | nM                  |         | nM                   |      |
| Blood Sample (30:00)            | 61.36                              | ±4.1    | 8.46                | ±0.4    | 2.42                 | ±0.2 |
| Respiratory Epithelium          | 680,567                            | ±85,021 | 58,080              | ±10,300 | 2,728                | ±233 |
| Olfactory Epithelium            | 4,112                              | ±694    | 92                  | ±27     | 92                   | ±36  |
| Trigeminal Ganglion             | 311                                | ±79     | 5.3                 | ±1      | 1.3                  | ±0.2 |
| Maxillary Nerve                 | 264                                | ±46     | 7.5                 | ±0.9    | 1.8                  | ±0.4 |
| Mandibular Nerve                | 291                                | ±38     | 8.9                 | ±1.2    | 2.6                  | ±0.3 |
| Ophthalmic Nerve                | 320                                | ±58     | 9.3                 | ±1.2    | 2.1                  | ±0.3 |
| Olfactory Bulbs                 | 32.8                               | ±13     | 3.6                 | ±0.4    | 0.6                  | ±0.0 |
| Anterior Olfactory Nucleus      | 24.4                               | ±4.6    | 1.5                 | ±0.1    | 0.3                  | ±0.0 |
| Frontal Cortex                  | 20.8                               | ±3.8    | 3.0                 | ±0.7    | 0.3                  | ±0.0 |
| Caudate/Putamen                 | 41.1                               | ±11     | 1.1                 | ±0.1    | 0.3                  | ±0.0 |
| Septal Nucleus                  | 28.0                               | ±6      | 1.6                 | ±0.3    | 0.2                  | ±0.0 |
| Parietal Cortex                 | 27.9                               | ±7      | 1.2                 | ±0.1    | 0.3                  | ±0.0 |
| Hippocampus                     | 15.5                               | ±3.0    | 1.1                 | ±0.1    | 0.2                  | ±0.0 |
| Thalamus                        | 14.7                               | ±6      | 1.0                 | ±0.1    | 0.2                  | ±0.0 |
| Hypothalamus                    | 21.5                               | ±3.9    | 1.4                 | ±0.2    | 0.2                  | ±0.0 |
| Midbrain                        | 13.6                               | ±2.7    | 1.1                 | ±0.1    | 0.2                  | ±0.0 |
| Pons                            | 25.6                               | ±10     | 1.1                 | ±0.1    | 0.2                  | ±0.0 |
| Medulla                         | 25.4                               | ±9      | 1.1                 | ±0.1    | 0.3                  | ±0.0 |
| Cerebellum                      | 10.3                               | ±1.4    | 1.1                 | ±0.0    | 0.3                  | ±0.0 |
| Dorsal Dura                     | 152                                | ±12     | 25                  | ±4.8    | 4.0                  | ±0.7 |
| Ventral Dura                    | 271                                | ±43     | 14                  | ±1.3    | 2.9                  | ±0.6 |
| Spinal Dura                     | 31.3                               | ±8      | 2.8                 | ±0.6    | 1.0                  | ±0.3 |
| Upper Cervical Spinal Cord      | 32.7                               | ±8      | 1.8                 | ±0.1    | 0.4                  | ±0.1 |
| Lower Cervical Spinal Cord      | 4.2                                | ±0.3    | 0.7                 | ±0.1    | 0.2                  | ±0.0 |
| Thoracic Spinal Cord            | 4.7                                | ±0.5    | 0.6                 | ±0.0    | 0.1                  | ±0.0 |
| Lumbar Spinal Cord              | 4.6                                | ±0.6    | 0.7                 | ±0.0    | 0.1                  | ±0.0 |
| Circle of Willis/Basilar Artery | -                                  | -       | 7                   | ±1.7    | 1.2                  | ±0.2 |
| Renal Artery                    | -                                  | -       | 2.0                 | ±0.2    | 0.6                  | ±0.1 |
| Superficial Nodes (2)           | 232                                | ±25     | 32                  | ±7      | 3.8                  | ±0.7 |
| Cervical Nodes (2)              | 213                                | ±36     | 13                  | ±2.2    | 3.0                  | ±0.5 |
| Axillary Nodes (2)              | 21.8                               | ±2.1    | 1.6                 | ±0.1    | 0.6                  | ±0.1 |
| Thyroid                         | 213                                | ±36     | 80                  | ±10     | 29                   | ±5   |
| Muscle (R, deltoid)             | 13.6                               | ±1.2    | 1.4                 | ±0.1    | 0.3                  | ±0.0 |
| Liver (R, superficial lobe)     | 13.3                               | ±1.3    | 1.1                 | ±0.1    | 0.6                  | ±0.1 |
| Kidney (L, tip)                 | 43.6                               | ±3.0    | 2.2                 | ±0.3    | 0.6                  | ±0.1 |
| Lung (R, top lobe)              | 20.7                               | ±2.4    | 2.1                 | ±0.2    | 0.6                  | ±0.1 |
| Trachea (near cut-off)          | 25.7                               | ±3.2    | 3.1                 | ±0.5    | 0.7                  | ±0.1 |
| Esophagus (near cut-off)        | 24.6                               | ±2.0    | 2.3                 | ±0.2    | 0.9                  | ±0.1 |
| Spleen (tip)                    | 22.7                               | ±2.1    | 1.9                 | ±0.2    | 0.6                  | ±0.1 |
| Heart                           | 16.3                               | ±1.2    | 1.1                 | ±0.1    | 0.3                  | ±0.0 |
| Urine (fill to line of tube)    | 72.8                               | ±11.2   | 4.2                 | ±0.6    | 1.1                  | ±0.2 |
| CPM/fmol                        | 0.2                                | ±0.0    | 1.4                 | ±0.0    | 12.7                 | ±0.1 |

**Table 04: Comparison of 0.04, 0.04, and 0.004 mg Intranasal Oxytocin Doses  
(Expressed as Percentages)**

| Tissue Description              | 0.04 mg versus 0.4 mg (%) |          | 0.004 mg versus 0.4 mg (%) |          | 0.004 mg versus 0.04 mg (%) |          |
|---------------------------------|---------------------------|----------|----------------------------|----------|-----------------------------|----------|
|                                 | Measured                  | Expected | Measured                   | Expected | Measured                    | Expected |
| Blood Sample (30:00)            | 13.8                      | 10.0     | 3.9                        | 1.00     | 28.6                        | 10.0     |
| Respiratory Epithelium          | 8.5                       | 10.0     | 0.4                        | 1.00     | 4.7                         | 10.0     |
| Olfactory Epithelium            | 2.2                       | 10.0     | 2.2                        | 1.00     | 100.2                       | 10.0     |
| Trigeminal Ganglion             | 1.7                       | 10.0     | 0.4                        | 1.00     | 23.6                        | 10.0     |
| Maxillary Nerve                 | 2.9                       | 10.0     | 0.7                        | 1.00     | 24.4                        | 10.0     |
| Mandibular Nerve                | 3.0                       | 10.0     | 0.9                        | 1.00     | 29.3                        | 10.0     |
| Ophthalmic Nerve                | 2.9                       | 10.0     | 0.7                        | 1.00     | 22.9                        | 10.0     |
| Olfactory Bulbs                 | 11.1                      | 10.0     | 2.0                        | 1.00     | 17.9                        | 10.0     |
| Anterior Olfactory Nucleus      | 6.0                       | 10.0     | 1.3                        | 1.00     | 22.3                        | 10.0     |
| Frontal Cortex                  | 14.2                      | 10.0     | 1.5                        | 1.00     | 10.3                        | 10.0     |
| Caudate/Putamen                 | 2.6                       | 10.0     | 0.6                        | 1.00     | 23.9                        | 10.0     |
| Septal Nucleus                  | 5.7                       | 10.0     | 0.7                        | 1.00     | 12.5                        | 10.0     |
| Parietal Cortex                 | 4.2                       | 10.0     | 0.9                        | 1.00     | 22.7                        | 10.0     |
| Hippocampus                     | 7.2                       | 10.0     | 1.2                        | 1.00     | 16.7                        | 10.0     |
| Thalamus                        | 6.8                       | 10.0     | 1.3                        | 1.00     | 18.3                        | 10.0     |
| Hypothalamus                    | 6.7                       | 10.0     | 1.0                        | 1.00     | 15.1                        | 10.0     |
| Midbrain                        | 8.3                       | 10.0     | 1.7                        | 1.00     | 20.4                        | 10.0     |
| Pons                            | 4.3                       | 10.0     | 0.9                        | 1.00     | 21.7                        | 10.0     |
| Medulla                         | 4.5                       | 10.0     | 1.0                        | 1.00     | 22.7                        | 10.0     |
| Cerebellum                      | 10.4                      | 10.0     | 2.5                        | 1.00     | 24.2                        | 10.0     |
| Dorsal Dura                     | 16.2                      | 10.0     | 2.6                        | 1.00     | 16.0                        | 10.0     |
| Ventral Dura                    | 5.3                       | 10.0     | 1.1                        | 1.00     | 20.1                        | 10.0     |
| Spinal Dura                     | 9.0                       | 10.0     | 3.3                        | 1.00     | 37.3                        | 10.0     |
| Upper Cervical Spinal Cord      | 5.6                       | 10.0     | 1.2                        | 1.00     | 20.6                        | 10.0     |
| Lower Cervical Spinal Cord      | 17.4                      | 10.0     | 3.7                        | 1.00     | 21.4                        | 10.0     |
| Thoracic Spinal Cord            | 12.5                      | 10.0     | 2.6                        | 1.00     | 20.4                        | 10.0     |
| Lumbar Spinal Cord              | 14.5                      | 10.0     | 3.0                        | 1.00     | 20.6                        | 10.0     |
| Circle of Willis/Basilar Artery | -                         | -        | -                          | -        | 17.8                        | 10.0     |
| Renal Artery                    | -                         | -        | -                          | -        | 29.9                        | 10.0     |
| Superficial Nodes (2)           | 13.9                      | 10.0     | 1.6                        | 1.00     | 11.7                        | 10.0     |
| Cervical Nodes (2)              | 6.0                       | 10.0     | 1.4                        | 1.00     | 23.2                        | 10.0     |
| Axillary Nodes (2)              | 7.4                       | 10.0     | 2.6                        | 1.00     | 34.5                        | 10.0     |
| Thyroid                         | 37.5                      | 10.0     | 13.5                       | 1.00     | 35.9                        | 10.0     |
| Muscle (R, deltoid)             | 10.2                      | 10.0     | 2.4                        | 1.00     | 23.2                        | 10.0     |
| Liver (R, superficial lobe)     | 8.3                       | 10.0     | 4.3                        | 1.00     | 52.5                        | 10.0     |
| Kidney (L, tip)                 | 4.9                       | 10.0     | 1.3                        | 1.00     | 25.6                        | 10.0     |
| Lung (R, top lobe)              | 10.1                      | 10.0     | 3.1                        | 1.00     | 30.2                        | 10.0     |
| Trachea (near cut-off)          | 11.9                      | 10.0     | 2.8                        | 1.00     | 23.3                        | 10.0     |
| Esophagus (near cut-off)        | 9.4                       | 10.0     | 3.8                        | 1.00     | 40.1                        | 10.0     |
| Spleen (tip)                    | 8.5                       | 10.0     | 2.6                        | 1.00     | 30.1                        | 10.0     |
| Heart                           | 6.7                       | 10.0     | 1.7                        | 1.00     | 25.0                        | 10.0     |
| Urine (fill to line of tube)    | 5.8                       | 10.0     | 1.5                        | 1.00     | 25.5                        | 10.0     |

Figure 01: Dose Response Curve

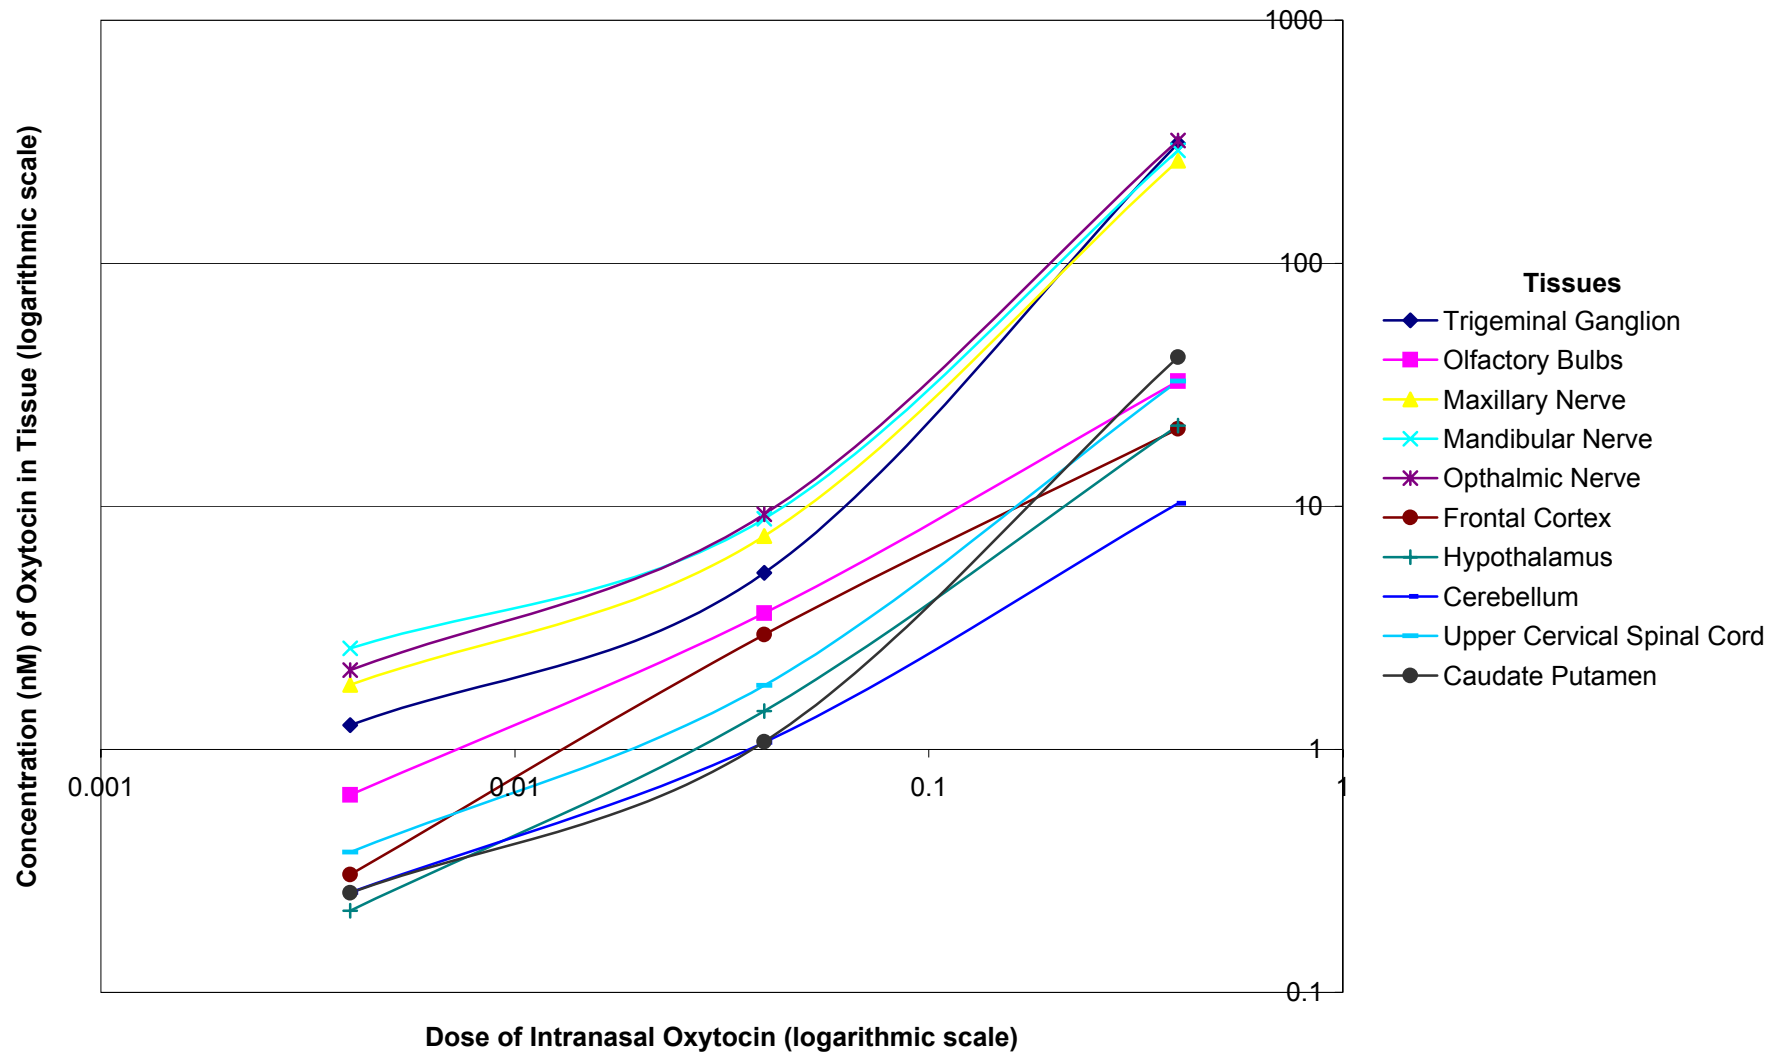

## **Appendix A – 0.04 mg Intranasal Oxytocin Data**

### **Tables**

Table A01: Intranasal Oxytocin Rat 42 Data

Table A02: Intranasal Oxytocin Rat 43 Data

Table A03: Intranasal Oxytocin Rat 46 Data

Table A04: Intranasal Oxytocin Rat 47 Data

Table A05: Intranasal Oxytocin Rat 50 Data

Table A06: Intranasal Oxytocin Rat 51 Data

Table A07: Intranasal Oxytocin Rat 54 Data

Table A08: Intranasal Oxytocin Rat 55 Data

Table A09: Intranasal Oxytocin Rat 58 Data

Table A10: Intranasal Oxytocin Rat 59 Data



**Table A01: 0.04 mg Intranasal Oxytocin Rat 42 Data**

| Trigemina Rat 42  | Route | Com-pound | Volume (uL) | uCi   | mg    | Time (min) | Perfused @ (min) |
|-------------------|-------|-----------|-------------|-------|-------|------------|------------------|
| Amount Delivered: | IN    | Oxytocin  | 44          | 41.00 | 0.040 | 14.01      | 31.01            |

  

| Tissue Description           | Tube # | Tube (g) | Tissue + Tube (g) | Tissue Weight (g) | CPM     | nM (Spec. Act.)   | nM (Stan.)        |
|------------------------------|--------|----------|-------------------|-------------------|---------|-------------------|-------------------|
| Dorsal Dura                  | 1      | 2.99050  | 3.00015           | 0.00965           | 169     | 9.20              | 13.34             |
| Ventral Dura                 | 2      | 2.97726  | 2.98450           | 0.00724           | 119     | 8.63              | 12.52             |
| Trigeminal Ganglion          | 3      | 2.98192  | 3.00475           | 0.02283           | 225     | 5.17              | 7.49              |
| Maxillary Nerve              | 4      | 3.03144  | 3.04436           | 0.01292           | 149     | 6.04              | 8.75              |
| Ophthalmic Nerve             | 5      | 3.03160  | 3.03464           | 0.00304           | 23      | 4.04              | 5.86              |
| Mandibular Nerve             | 6      | 2.97978  | 2.98647           | 0.00669           | 58      | 4.57              | 6.62              |
| Upper Cervical Spinal Cord   | 7      | 2.98545  | 3.02174           | 0.03629           | 89      | 1.29              | 1.87              |
| Olfactory Bulbs              | 8      | 2.98542  | 3.08527           | 0.09985           | 380     | 2.00              | 2.90              |
| Anterior Olfactory Nucleus   | 9      | 2.97877  | 3.02220           | 0.04343           | 71      | 0.86              | 1.24              |
| Frontal Cortex               | 10     | 2.97670  | 3.02615           | 0.04945           | 88      | 0.94              | 1.36              |
| Caudate/Putamen              | 11     | 3.03418  | 3.04601           | 0.01183           | 37      | 1.63              | 2.36              |
| Septal Nucleus               | 12     | 2.97729  | 2.98768           | 0.01039           | 49      | 2.47              | 3.58              |
| Parietal Cortex              | 13     | 2.95332  | 3.00150           | 0.04818           | 63      | 0.68              | 0.99              |
| Hippocampus                  | 14     | 3.00003  | 3.03266           | 0.03263           | 55      | 0.88              | 1.27              |
| Thalamus                     | 15     | 2.98570  | 3.05692           | 0.07122           | 76      | 0.56              | 0.82              |
| Hypothalamus                 | 16     | 2.99831  | 3.03253           | 0.03422           | 37      | 0.57              | 0.83              |
| Midbrain                     | 17     | 2.95318  | 3.05411           | 0.10093           | 129     | 0.67              | 0.97              |
| Pons                         | 18     | 2.94860  | 3.01638           | 0.06778           | 95      | 0.73              | 1.07              |
| Medulla                      | 19     | 3.03292  | 3.14395           | 0.11103           | 173     | 0.82              | 1.19              |
| Cerebellum                   | 20     | 2.98115  | 3.24528           | 0.26413           | 358     | 0.71              | 1.03              |
| Superficial Nodes (2)        | 21     | 2.99392  | 3.07652           | 0.08260           | 7914    | 50.32             | 72.96             |
| Cervical Nodes (2)           | 22     | 2.97272  | 2.98781           | 0.01509           | 1083    | 37.68             | 54.63             |
| Thyroid                      | 23     | 2.97501  | 2.99773           | 0.02272           | 20353   | 470.46            | 682.16            |
| Olfactory Epithelium         | 24     | 2.96018  | 3.01356           | 0.05338           | 1615    | 15.88             | 23.03             |
| Respiratory Epithelium       | 25     | 2.98074  | 3.03969           | 0.05895           | 7170011 | 63,876.45         | 92,619.55         |
| Axillary Nodes (2)           | 26     | 2.97257  | 3.01444           | 0.04187           | 75      | 0.94              | 1.36              |
| Muscle (R, deltoid)          | 27     | 2.97866  | 3.00404           | 0.02538           | 38      | 0.79              | 1.15              |
| Liver (R, superficial lobe)  | 28     | 2.94927  | 2.97412           | 0.02485           | 27      | 0.56              | 0.82              |
| Kidney (L, tip)              | 29     | 2.98618  | 3.00920           | 0.02302           | 153     | 3.49              | 5.06              |
| Lung (R, top lobe)           | 30     | 2.99626  | 3.00398           | 0.00772           | 43      | 2.94              | 4.26              |
| Trachea (near cut-off)       | 31     | 2.96958  | 2.98401           | 0.01443           | 27      | 1.00              | 1.45              |
| Esophagus (near cut-off)     | 32     | 2.99054  | 3.00383           | 0.01329           | 34      | 1.33              | 1.93              |
| Spleen (tip)                 | 33     | 2.97985  | 2.99870           | 0.01885           | 65      | 1.80              | 2.61              |
| Heart                        | 34     | 2.95214  | 2.98230           | 0.03016           | 44      | 0.76              | 1.11              |
| Urine (fill to line of tube) | 35     | 2.94895  | 3.06478           | 0.11583           | 643     | 2.91              | 4.23              |
| Spinal Dura                  | 36     | 2.97820  | 2.98371           | 0.00551           | 9       | 0.84              | 1.22              |
| Lower Cervical Spinal Cord   | 37     | 2.94614  | 3.06525           | 0.11911           | 102     | 0.45              | 0.65              |
| Thoracic Spinal Cord         | 38     | 2.96530  | 3.06651           | 0.10121           | 78      | 0.40              | 0.58              |
| Lumbar Spinal Cord           | 39     | 2.97241  | 3.07740           | 0.10499           | 83      | 0.42              | 0.60              |
| Blood Sample                 | 40     | 2.98244  | 3.28836           | 0.30592           | 2688    | 4.61              | 6.69              |
| Drug Standard                | 41     | 2.97704  | 2.97976           | 0.00272           | 3475052 |                   |                   |
| Drug Standard                | 42     | 2.95510  | 2.95777           | 0.00267           | 3539290 |                   |                   |
| Drug Standard                | 43     | 2.96602  | 2.96866           | 0.00264           | 3546673 |                   |                   |
|                              |        |          |                   |                   |         | 1.904<br>cpm/fmol | 1.313<br>cpm/fmol |

| Auto Calculations                                    | Enter Values                        |
|------------------------------------------------------|-------------------------------------|
| Total uL of Dose Sol = 58.4                          | Oxytocin Molecular Weight = 1,007   |
| Hot mg = 0.0000                                      | Date of Synthesis = 03/10/08        |
| Cold mg = 0.0526                                     | Hot uCi/uL at Synthesis = 1.000     |
| Total mg in Dose Sol = 0.0526                        | Hot uCi/ug at Synthesis = 2184.30   |
| Conc Of Dose Sol (ug/uL) = 0.9000                    | Cold ug/uL = 20.00                  |
| Days after Synthesis Delivered = 3                   | Desired uCi = 41.0                  |
| Decay on Day Delivered = 0.9659                      | Desired mg = 0.040                  |
| Total uCi in Dose Sol on Day Delivered = 53.91       | Estimated Desired nmol = 39.7       |
| uCi/uL in Dose Sol on Day Delivered = 0.9225         | <b>Date of Delivery = 03/13/08</b>  |
| mg delivered = 0.040                                 | <b>uL delivered (actual) = 44.4</b> |
| uCi delivered = 41.00                                | <b>Date of Counting = 03/13/08</b>  |
| Estimated nmol delivered = 39.71                     | <b>Dose Calculator</b>              |
| Days after Synthesis Counted = 3                     | uL Hot to Deliver = 42.45           |
| Decay on Day Counted = 0.9659                        | uL Cold to Deliver = 2.00           |
| Specific Activity from Specs (cpm/fmol) = 1.904      | Total uL to Deliver = 44.44         |
| Avg. Volume of Standard (uL)* = 3.0                  | Hot to Cold Ratio = 21.23           |
| Avg. CPM-bkgd of Standard = 3,520,338                | Total uL to Make = 58.44            |
| Specific Activity from Standards: (CPM/fmol) = 1.313 | Dose Solution uL Hot = 55.82        |
| Date of Disposal from Decay Storage = 10/31/09       | Dose Solution uL Cold = 2.63        |
| Average Background = 25.00                           | Efficiency of Counter = 83.08       |

\*assume 3 uL

**Table A02: 0.04 mg Intranasal Oxytocin Rat 43 Data**

| Trigemina Rat 43  |  | Route | Com-pound | Volume (uL) | uCi   | mg    | Time (min) | Perfused @ (min) |
|-------------------|--|-------|-----------|-------------|-------|-------|------------|------------------|
| Amount Delivered: |  | IN    | Oxytocin  | 44          | 41.00 | 0.040 | 14:04      | 30:57            |

  

| Tissue Description           | Tube # | Tube (g) | Tissue + Tube (g) | Tissue Weight (g) | CPM     | nM (Spec. Act.)   | nM (Stan.)        |
|------------------------------|--------|----------|-------------------|-------------------|---------|-------------------|-------------------|
| Dorsal Dura                  | 1      | 2.98521  | 2.99527           | 0.01006           | 2195    | 114.58            | 170.03            |
| Ventral Dura                 | 2      | 2.95690  | 2.96673           | 0.00983           | 880     | 47.04             | 69.80             |
| Trigeminal Ganglion          | 3      | 2.97811  | 3.00671           | 0.02860           | 337     | 6.19              | 9.19              |
| Maxillary Nerve              | 4      | 2.98860  | 3.00040           | 0.01180           | 94      | 4.18              | 6.20              |
| Ophthalmic Nerve             | 5      | 2.98178  | 2.98410           | 0.00232           | 32      | 7.13              | 10.58             |
| Mandibular Nerve             | 6      | 2.95229  | 2.95462           | 0.00233           | 44      | 9.85              | 14.62             |
| Upper Cervical Spinal Cord   | 7      | 2.96428  | 3.01973           | 0.05545           | 334     | 3.16              | 4.69              |
| Olfactory Bulbs              | 8      | 2.99281  | 3.04388           | 0.05107           | 284     | 2.92              | 4.33              |
| Anterior Olfactory Nucleus   | 9      | 2.98571  | 3.01269           | 0.02698           | 244     | 4.75              | 7.05              |
| Frontal Cortex               | 10     | 2.97205  | 3.00083           | 0.02878           | 201     | 3.67              | 5.45              |
| Caudate/Putamen              | 11     | 2.98470  | 2.99620           | 0.01150           | 20      | 0.91              | 1.35              |
| Septal Nucleus               | 12     | 2.97616  | 2.99210           | 0.01594           | 23      | 0.75              | 1.12              |
| Parietal Cortex              | 13     | 2.95444  | 2.99922           | 0.04478           | 318     | 3.73              | 5.53              |
| Hippocampus                  | 14     | 2.95529  | 2.97605           | 0.02076           | 26      | 0.67              | 0.99              |
| Thalamus                     | 15     | 3.00133  | 3.05580           | 0.05447           | 78      | 0.76              | 1.12              |
| Hypothalamus                 | 16     | 2.99070  | 3.00881           | 0.01811           | 53      | 1.54              | 2.29              |
| Midbrain                     | 17     | 2.98043  | 3.11021           | 0.12978           | 252     | 1.02              | 1.52              |
| Pons                         | 18     | 2.95288  | 3.03197           | 0.07909           | 331     | 2.19              | 3.26              |
| Medulla                      | 19     | 2.97975  | 3.08769           | 0.10794           | 403     | 1.96              | 2.91              |
| Cerebellum                   | 20     | 2.97704  | 3.22735           | 0.25031           | 2183    | 4.58              | 6.80              |
| Superficial Nodes (2)        | 21     | 3.02877  | 3.11346           | 0.08469           | 1984    | 12.30             | 18.25             |
| Cervical Nodes (2)           | 22     | 2.97540  | 2.98694           | 0.01154           | 128     | 5.83              | 8.66              |
| Thyroid                      | 23     | 2.98811  | 3.01505           | 0.02694           | 1548    | 30.18             | 44.78             |
| Olfactory Epithelium         | 24     | 2.95713  | 3.03916           | 0.08203           | 420809  | 2,694.12          | 3,997.84          |
| Respiratory Epithelium       | 25     | 2.98360  | 3.05101           | 0.06741           | 7311278 | 56,960.50         | 84,524.54         |
| Axillary Nodes (2)           | 26     | 2.94250  | 2.96219           | 0.01969           | 33      | 0.87              | 1.29              |
| Muscle (R, deltoid)          | 27     | 2.95922  | 2.98877           | 0.02955           | 55      | 0.98              | 1.46              |
| Liver (R, superficial lobe)  | 28     | 2.95092  | 2.98225           | 0.03133           | 32      | 0.54              | 0.80              |
| Kidney (L, tip)              | 29     | 2.97123  | 3.00429           | 0.03306           | 54      | 0.86              | 1.28              |
| Lung (R, top lobe)           | 30     | 2.96880  | 2.98342           | 0.01462           | 56      | 2.01              | 2.99              |
| Trachea (near cut-off)       | 31     | 2.97444  | 2.98824           | 0.01380           | 35      | 1.33              | 1.97              |
| Esophagus (near cut-off)     | 32     | 2.99234  | 3.00316           | 0.01082           | 26      | 1.25              | 1.85              |
| Spleen (tip)                 | 33     | 2.98436  | 3.01511           | 0.03075           | 34      | 0.58              | 0.86              |
| Heart                        | 34     | 2.94326  | 2.96055           | 0.01729           | 32      | 0.98              | 1.46              |
| Urine (fill to line of tube) | 35     | 2.97844  | 3.10345           | 0.12501           | 145     | 0.61              | 0.91              |
| Spinal Dura                  | 36     | 2.94643  | 2.95623           | 0.00980           | 19      | 1.01              | 1.50              |
| Lower Cervical Spinal Cord   | 37     | 3.06798  | 3.19276           | 0.12478           | 98      | 0.41              | 0.61              |
| Thoracic Spinal Cord         | 38     | 2.97171  | 3.07038           | 0.09867           | 76      | 0.40              | 0.60              |
| Lumbar Spinal Cord           | 39     | 2.96128  | 3.06910           | 0.10782           | 80      | 0.39              | 0.58              |
| Blood Sample                 | 40     | 3.01546  | 3.22838           | 0.21292           | 1901    | 4.69              | 6.96              |
| Drug Standard                | 41     | 2.96995  | 2.97302           | 0.00307           | 3083515 |                   |                   |
| Drug Standard                | 42     | 2.95824  | 2.96087           | 0.00263           | 3601923 |                   |                   |
| Drug Standard                | 43     | 2.97378  | 2.97651           | 0.00273           | 3634058 |                   |                   |
|                              |        |          |                   |                   |         | 1.904<br>cpm/fmol | 1.283<br>cpm/fmol |

| Auto Calculations                                    | Enter Values                        |
|------------------------------------------------------|-------------------------------------|
| Total uL of Dose Sol = 58.4                          | Oxytocin Molecular Weight = 1,007   |
| Hot mg = 0.0000                                      | Date of Synthesis = 03/10/08        |
| Cold mg = 0.0526                                     | Hot uCi/uL at Synthesis = 1,000     |
| Total mg in Dose Sol = 0.0526                        | Hot uCi/ug at Synthesis = 2184.30   |
| Conc Of Dose Sol (ug/uL) = 0.9000                    | Cold ug/uL = 20.00                  |
| Days after Synthesis Delivered = 3                   | Desired uCi = 41.0                  |
| Decay on Day Delivered = 0.9659                      | Desired mg = 0.040                  |
| Total uCi in Dose Sol on Day Delivered = 53.91       | Estimated Desired nmol = 397.1      |
| uCi/uL in Dose Sol on Day Delivered = 0.9225         | <b>Date of Delivery = 03/13/08</b>  |
| mg delivered = 0.040                                 | <b>uL delivered (actual) = 44.4</b> |
| uCi delivered = 41.00                                | <b>Date of Counting = 03/13/08</b>  |
| Estimated nmol delivered = 39.71                     | <b>Dose Calculator</b>              |
| Days after Synthesis Counted = 3                     | uL Hot to Deliver = 42.45           |
| Decay on Day Counted = 0.9659                        | uL Cold to Deliver = 2.00           |
| Specific Activity from Specs (cpm/fmol) = 1.904      | Total uL to Deliver = 44.44         |
| Avg. Volume of Standard (uL)* = 3.0                  | Hot to Cold Ratio = 21.23           |
| Avg. CPM-bkgd of Standard = 3,439,832                | Total uL to Make = 58.44            |
| Specific Activity from Standards: (CPM/fmol) = 1.283 | Dose Solution uL Hot = 55.82        |
| Date of Disposal from Decay Storage = 10/31/09       | Dose Solution uL Cold = 2.63        |
| Average Background= 25.00                            | Efficiency of Counter= 83.08        |

\*assume 3 uL

**Table A03: 0.04 mg Intranasal Oxytocin Rat 46 Data**

| Trigemina Rat 46  |  | Route | Com-pound | Volume (uL) | uCi   | mg    | Time (min) | Perfused @ (min) |
|-------------------|--|-------|-----------|-------------|-------|-------|------------|------------------|
| Amount Delivered: |  | IN    | Oxytocin  | 47          | 41.00 | 0.040 | 14.00      | 30:36            |

  

| Tissue Description           | Tube # | Tube (g) | Tissue + Tube (g) | Tissue Weight (g) | CPM     | nM (Spec. Act.)   | nM (Stan.)        |
|------------------------------|--------|----------|-------------------|-------------------|---------|-------------------|-------------------|
| Dorsal Dura                  | 1      | 3.02796  | 3.04773           | 0.01977           | 2186    | 58.07             | 80.41             |
| Ventral Dura                 | 2      | 2.98364  | 3.00215           | 0.01851           | 394     | 11.19             | 15.49             |
| Trigeminal Ganglion          | 3      | 2.95337  | 2.97663           | 0.02326           | 686     | 15.49             | 21.44             |
| Maxillary Nerve              | 4      | 2.97884  | 2.99090           | 0.01206           | 183     | 7.95              | 11.00             |
| Ophthalmic Nerve             | 5      | 2.98899  | 2.99219           | 0.00320           | 48      | 7.81              | 10.82             |
| Mandibular Nerve             | 6      | 2.97425  | 2.97722           | 0.00297           | 144     | 25.37             | 35.13             |
| Upper Cervical Spinal Cord   | 7      | 2.97150  | 3.03344           | 0.06194           | 199     | 1.68              | 2.33              |
| Olfactory Bulbs              | 8      | 2.99804  | 3.08156           | 0.08352           | 379     | 2.38              | 3.30              |
| Anterior Olfactory Nucleus   | 9      | 2.99815  | 3.04099           | 0.04284           | 92      | 1.13              | 1.57              |
| Frontal Cortex               | 10     | 2.98687  | 3.03045           | 0.04358           | 86      | 1.04              | 1.44              |
| Caudate/Putamen              | 11     | 2.95049  | 2.96170           | 0.01121           | 23      | 1.07              | 1.49              |
| Septal Nucleus               | 12     | 2.97796  | 2.98998           | 0.01202           | 23      | 1.02              | 1.41              |
| Parietal Cortex              | 13     | 2.95776  | 3.00443           | 0.04667           | 84      | 0.95              | 1.31              |
| Hippocampus                  | 14     | 2.98269  | 3.01721           | 0.03452           | 55      | 0.84              | 1.16              |
| Thalamus                     | 15     | 2.99370  | 3.06652           | 0.07282           | 104     | 0.75              | 1.04              |
| Hypothalamus                 | 16     | 2.98642  | 3.01659           | 0.03017           | 89      | 1.55              | 2.15              |
| Midbrain                     | 17     | 2.98521  | 3.09260           | 0.10739           | 200     | 0.98              | 1.36              |
| Pons                         | 18     | 2.98613  | 3.04867           | 0.06254           | 133     | 1.12              | 1.55              |
| Medulla                      | 19     | 2.97710  | 3.08558           | 0.10848           | 194     | 0.94              | 1.30              |
| Cerebellum                   | 20     | 2.98320  | 3.25780           | 0.27460           | 488     | 0.93              | 1.29              |
| Superficial Nodes (2)        | 21     | 2.99041  | 3.05877           | 0.06836           | 3783    | 29.06             | 40.24             |
| Cervical Nodes (2)           | 22     | 2.95443  | 2.96596           | 0.01153           | 406     | 18.48             | 25.59             |
| Thyroid                      | 23     | 2.99327  | 3.01133           | 0.01806           | 1599    | 46.51             | 64.39             |
| Olfactory Epithelium         | 24     | 2.98796  | 3.06220           | 0.07424           | 7614    | 53.86             | 74.57             |
| Respiratory Epithelium       | 25     | 3.07243  | 3.12490           | 0.05247           | 8675732 | 86,836.01         | 120,227.43        |
| Axillary Nodes (2)           | 26     | 2.99003  | 3.01438           | 0.02435           | 68      | 1.46              | 2.03              |
| Muscle (R, deltoid)          | 27     | 2.96317  | 2.98566           | 0.02249           | 55      | 1.29              | 1.79              |
| Liver (R, superficial lobe)  | 28     | 2.95492  | 2.98941           | 0.03449           | 66      | 1.00              | 1.39              |
| Kidney (L, tip)              | 29     | 2.97860  | 3.00551           | 0.02691           | 121     | 2.36              | 3.26              |
| Lung (R, top lobe)           | 30     | 2.97606  | 2.99186           | 0.01580           | 64      | 2.12              | 2.93              |
| Trachea (near cut-off)       | 31     | 2.96368  | 2.97556           | 0.01188           | 56      | 2.46              | 3.41              |
| Esophagus (near cut-off)     | 32     | 2.96596  | 2.97692           | 0.01096           | 41      | 1.96              | 2.71              |
| Spleen (tip)                 | 33     | 3.00121  | 3.04092           | 0.03971           | 90      | 1.18              | 1.64              |
| Heart                        | 34     | 3.02303  | 3.05359           | 0.03056           | 46      | 0.79              | 1.10              |
| Urine (fill to line of tube) | 35     | 2.97231  | 3.15169           | 0.17938           | 887     | 2.60              | 3.60              |
| Spinal Dura                  | 36     | 2.97063  | 2.97625           | 0.00562           | 45      | 4.23              | 5.86              |
| Lower Cervical Spinal Cord   | 37     | 2.97902  | 3.09844           | 0.11942           | 201     | 0.88              | 1.23              |
| Thoracic Spinal Cord         | 38     | 2.96411  | 3.05220           | 0.08809           | 96      | 0.57              | 0.79              |
| Lumbar Spinal Cord           | 39     | 2.96741  | 3.09653           | 0.12912           | 149     | 0.61              | 0.84              |
| Blood Sample                 | 40     | 2.98429  | 3.32351           | 0.33922           | 4561    | 7.06              | 9.78              |
| Drug Standard                | 41     | 2.99291  | 2.99540           | 0.00249           | 3462876 |                   |                   |
| Drug Standard                | 42     | 2.97024  | 2.97264           | 0.00240           | 3483020 |                   |                   |
| Drug Standard                | 43     | 3.03936  | 3.04188           | 0.00252           | 3520120 |                   |                   |
|                              |        |          |                   |                   |         | 1.904<br>cpm/fmol | 1.375<br>cpm/fmol |

| Auto Calculations                                    | Enter Values                        |
|------------------------------------------------------|-------------------------------------|
| Total uL of Dose Sol = 61.0                          | Oxytocin Molecular Weight = 1.007   |
| Hot mg = 0.0000                                      | Date of Synthesis = 03/10/08        |
| Cold mg = 0.0519                                     | Hot uCi/uL at Synthesis = 1.000     |
| Total mg in Dose Sol = 0.0519                        | Hot uCi/ug at Synthesis = 2184.30   |
| Conc Of Dose Sol (ug/uL) = 0.8516                    | Cold ug/uL = 20.00                  |
| Days after Synthesis Delivered = 8                   | Desired uCi = 41.0                  |
| Decay on Day Delivered = 0.9117                      | Desired mg = 0.040                  |
| Total uCi in Dose Sol on Day Delivered = 53.22       | Estimated Desired nMol = 397.1      |
| uCi/uL in Dose Sol on Day Delivered = 0.8729         | <b>Date of Delivery = 03/18/08</b>  |
| mg delivered = 0.040                                 | <b>uL delivered (actual) = 47.0</b> |
| uCi delivered = 41.00                                | <b>Date of Counting = 03/18/08</b>  |
| Estimated nMol delivered = 39.72                     | <b>Dose Calculator</b>              |
| Days after Synthesis Counted = 8                     | uL Hot to Deliver = 44.97           |
| Decay on Day Counted = 0.9117                        | uL Cold to Deliver = 2.00           |
| Specific Activity from Specs (cpm/fmol) = 1.904      | Total uL to Deliver = 46.97         |
| Avg. Volume of Standard (uL) = 3.0                   | Hot to Cold Ratio = 22.50           |
| Avg. CPM-bkgd of Standard = 3,488,672                | Total uL to Make = 60.97            |
| Specific Activity from Standards: (CPM/fmol) = 1.375 | Dose Solution uL Hot = 58.37        |
| Date of Disposal from Decay Storage = 10/31/09       | Dose Solution uL Cold = 2.59        |
| Average Background = 25.00                           | Efficiency of Counter = 83.08       |

\*assume 3 uL

**Table A04: 0.04 mg Intranasal Oxytocin Rat 47 Data**

| Trigemina Rat 47  | Route | Com-pound | Volume (uL) | uCi   | mg    | Time (min) | Perfused @ (min) |
|-------------------|-------|-----------|-------------|-------|-------|------------|------------------|
| Amount Delivered: | IN    | Oxytocin  | 47          | 41.00 | 0.040 | 14.00      | 30:46            |

  

| Tissue Description           | Tube # | Tube (g) | Tissue + Tube (g) | Tissue Weight (g) | CPM     | nM (Spec. Act.)   | nM (Stan.)        |
|------------------------------|--------|----------|-------------------|-------------------|---------|-------------------|-------------------|
| Dorsal Dura                  | 1      | 2.98779  | 3.00120           | 0.01341           | 2138    | 83.71             | 115.91            |
| Ventral Dura                 | 2      | 2.98150  | 2.99090           | 0.00940           | 162     | 9.07              | 12.55             |
| Trigeminal Ganglion          | 3      | 2.99245  | 3.01596           | 0.02311           | 84      | 1.91              | 2.65              |
| Maxillary Nerve              | 4      | 3.03729  | 3.04822           | 0.01093           | 607     | 29.14             | 40.35             |
| Ophthalmic Nerve             | 5      | 2.99107  | 2.99398           | 0.00291           | 148     | 26.62             | 36.86             |
| Mandibular Nerve             | 6      | 2.98316  | 2.99049           | 0.00733           | 485     | 34.77             | 48.14             |
| Upper Cervical Spinal Cord   | 7      | 2.98588  | 3.00766           | 0.02178           | 61      | 1.46              | 2.02              |
| Olfactory Bulbs              | 8      | 2.98815  | 3.05458           | 0.06643           | 265     | 2.09              | 2.90              |
| Anterior Olfactory Nucleus   | 9      | 2.99280  | 3.03735           | 0.04455           | 7062    | 83.25             | 115.26            |
| Frontal Cortex               | 10     | 3.03393  | 3.08126           | 0.04733           | 415     | 4.61              | 6.38              |
| Caudate/Putamen              | 11     | 2.98377  | 2.99617           | 0.01240           | 72      | 3.04              | 4.20              |
| Septal Nucleus               | 12     | 2.95657  | 2.96734           | 0.01077           | 49      | 2.40              | 3.33              |
| Parietal Cortex              | 13     | 2.98383  | 3.03418           | 0.05035           | 215     | 2.24              | 3.10              |
| Hippocampus                  | 14     | 3.06544  | 3.09193           | 0.02849           | 51      | 1.02              | 1.41              |
| Thalamus                     | 15     | 2.98972  | 3.05209           | 0.06237           | 170     | 1.43              | 1.98              |
| Hypothalamus                 | 16     | 3.03132  | 3.06059           | 0.02927           | 81      | 1.45              | 2.00              |
| Midbrain                     | 17     | 2.98206  | 3.08742           | 0.10536           | 724     | 3.61              | 5.00              |
| Pons                         | 18     | 2.99870  | 3.06178           | 0.06308           | 568     | 4.73              | 6.54              |
| Medulla                      | 19     | 2.99163  | 3.09125           | 0.09962           | 571     | 3.01              | 4.17              |
| Cerebellum                   | 20     | 2.98819  | 3.22591           | 0.25772           | 8670    | 17.67             | 24.46             |
| Superficial Nodes (2)        | 21     | 2.97129  | 3.03092           | 0.05963           | 5761    | 50.74             | 70.25             |
| Cervical Nodes (2)           | 22     | 2.96645  | 2.98035           | 0.01390           | 130     | 4.90              | 6.79              |
| Thyroid                      | 23     | 3.00288  | 3.03315           | 0.03027           | 2946    | 51.11             | 70.76             |
| Olfactory Epithelium         | 24     | 2.97767  | 3.03903           | 0.06136           | 459575  | 3.933.47          | 5.446.02          |
| Respiratory Epithelium       | 25     | 2.98597  | 3.09304           | 0.10707           | 4172222 | 20,464.66         | 28,334.01         |
| Axillary Nodes (2)           | 26     | 2.97429  | 3.00109           | 0.02680           | 75      | 1.46              | 2.03              |
| Muscle (R, deltoid)          | 27     | 3.02020  | 3.05127           | 0.03107           | 74      | 1.25              | 1.72              |
| Liver (R, superficial lobe)  | 28     | 3.05783  | 3.07973           | 0.02190           | 247     | 5.93              | 8.21              |
| Kidney (L, tip)              | 29     | 2.98836  | 3.02732           | 0.03896           | 435     | 5.87              | 8.12              |
| Lung (R, top lobe)           | 30     | 2.97500  | 2.99813           | 0.02313           | 59      | 1.34              | 1.86              |
| Trachea (near cut-off)       | 31     | 2.98955  | 3.00013           | 0.01058           | 59      | 2.93              | 4.06              |
| Esophagus (near cut-off)     | 32     | 2.95088  | 2.96398           | 0.01310           | 101     | 4.05              | 5.61              |
| Spleen (tip)                 | 33     | 2.98284  | 3.01933           | 0.03649           | 91      | 1.31              | 1.82              |
| Heart                        | 34     | 2.96076  | 2.98493           | 0.02417           | 65      | 1.41              | 1.95              |
| Urine (fill to line of tube) | 35     | 2.97748  | 3.17222           | 0.19474           | 709     | 1.91              | 2.65              |
| Spinal Dura                  | 36     | 2.98082  | 2.98801           | 0.00719           | 39      | 2.84              | 3.93              |
| Lower Cervical Spinal Cord   | 37     | 2.98260  | 3.12707           | 0.14447           | 193     | 0.70              | 0.97              |
| Thoracic Spinal Cord         | 38     | 2.95584  | 3.05119           | 0.09535           | 99      | 0.55              | 0.78              |
| Lumbar Spinal Cord           | 39     | 3.02638  | 3.14129           | 0.11491           | 120     | 0.55              | 0.76              |
| Blood Sample                 | 40     | 2.98915  | 3.27922           | 0.29007           | 3657    | 6.62              | 9.17              |
| Drug Standard                | 41     | 2.99291  | 2.99540           | 0.00249           | 3462876 |                   |                   |
| Drug Standard                | 42     | 2.97024  | 2.97264           | 0.00240           | 3483020 |                   |                   |
| Drug Standard                | 43     | 3.03936  | 3.04188           | 0.00252           | 3520120 |                   |                   |
|                              |        |          |                   |                   |         | 1.904<br>cpm/fmol | 1.375<br>cpm/fmol |

| Auto Calculations                                    | Enter Values                        |
|------------------------------------------------------|-------------------------------------|
| Total uL of Dose Sol = 61.0                          | Oxytocin Molecular Weight = 1,007   |
| Hot mg = 0.0000                                      | Date of Synthesis = 03/10/08        |
| Cold mg = 0.0519                                     | Hot uCi/uL at Synthesis = 1.000     |
| Total mg in Dose Sol = 0.0519                        | Hot uCi/ug at Synthesis = 2184.30   |
| Conc Of Dose Sol (ug/uL) = 0.8516                    | Cold ug/uL = 20.00                  |
| Days after Synthesis Delivered = 8                   | Desired uCi = 41.0                  |
| Decay on Day Delivered = 0.9117                      | Desired mg = 0.040                  |
| Total uCi in Dose Sol on Day Delivered = 53.22       | Estimated Desired nmol = 397.1      |
| uCi/uL in Dose Sol on Day Delivered = 0.8729         | <b>Date of Delivery = 03/18/08</b>  |
| mg delivered = 0.040                                 | <b>uL delivered (actual) = 47.0</b> |
| uCi delivered = 41.00                                | <b>Date of Counting = 03/18/08</b>  |
| Estimated nmol delivered = 39.72                     | <b>Dose Calculator</b>              |
| Days after Synthesis Counted = 8                     | uL Hot to Deliver = 44.97           |
| Decay on Day Counted = 0.9117                        | uL Cold to Deliver = 2.00           |
| Specific Activity from Specs (cpm/fmol) = 1.904      | Total uL to Deliver = 46.97         |
| Avg. Volume of Standard (uL)* = 3.0                  | Hot to Cold Ratio = 22.50           |
| Avg. CPM-bkgd of Standard = 3,488,672                | Total uL to Make = 60.97            |
| Specific Activity from Standards: (CPM/fmol) = 1.375 | Dose Solution uL Hot = 58.37        |
| Date of Disposal from Decay Storage = 10/31/09       | Dose Solution uL Cold = 2.59        |
| Average Background = 25.00                           | Efficiency of Counter = 83.08       |

\*assume 3 uL

**Table A05: 0.04 mg Intranasal Oxytocin Rat 50 Data**

| Trigemina Rat 50  |  | Route | Com-pound | Volume (uL) | uCi   | mg    | Time (min) | Perfused @ (min) |
|-------------------|--|-------|-----------|-------------|-------|-------|------------|------------------|
| Amount Delivered: |  | IN    | Oxytocin  | 50          | 41.00 | 0.040 | 14:02      | 31:47            |

  

| Tissue Description              | Tube # | Tube (g) | Tissue + Tube (g) | Tissue Weight (g) | CPM     | nM (Spec. Act.)   | nM (Stan.)        |
|---------------------------------|--------|----------|-------------------|-------------------|---------|-------------------|-------------------|
| Dorsal Dura                     | 1      | 2.99010  | 3.00528           | 0.01518           | 546     | 18.93             | 25.46             |
| Ventral Dura                    | 2      | 2.97155  | 2.98825           | 0.01670           | 340     | 10.72             | 14.42             |
| Trigeminal Ganglion             | 3      | 2.96501  | 2.99117           | 0.02616           | 263     | 5.29              | 7.12              |
| Maxillary Nerve                 | 4      | 2.98577  | 2.99921           | 0.01344           | 168     | 6.58              | 8.85              |
| Ophthalmic Nerve                | 5      | 2.96910  | 2.97345           | 0.00435           | 47      | 5.66              | 7.61              |
| Mandibular Nerve                | 6      | 2.95921  | 2.96377           | 0.00456           | 81      | 9.33              | 12.55             |
| Upper Cervical Spinal Cord      | 7      | 3.03072  | 3.09158           | 0.06086           | 100     | 0.87              | 1.17              |
| Olfactory Bulbs                 | 8      | 3.00425  | 3.07661           | 0.07236           | 587     | 4.27              | 5.74              |
| Anterior Olfactory Nucleus      | 9      | 2.98778  | 3.02881           | 0.04103           | 105     | 1.35              | 1.81              |
| Frontal Cortex                  | 10     | 2.96492  | 3.01293           | 0.04801           | 147     | 1.61              | 2.17              |
| Caudate/Putamen                 | 11     | 2.96992  | 2.98176           | 0.01184           | 25      | 1.10              | 1.48              |
| Septal Nucleus                  | 12     | 2.98748  | 3.00338           | 0.01590           | 31      | 1.02              | 1.37              |
| Parietal Cortex                 | 13     | 2.92422  | 2.96719           | 0.04297           | 80      | 0.98              | 1.32              |
| Hippocampus                     | 14     | 2.98436  | 3.03699           | 0.05263           | 90      | 0.90              | 1.21              |
| Thalamus                        | 15     | 3.00835  | 3.08202           | 0.07367           | 131     | 0.93              | 1.25              |
| Hypothalamus                    | 16     | 3.06975  | 3.09697           | 0.02722           | 49      | 0.94              | 1.26              |
| Midbrain                        | 17     | 2.98461  | 3.05695           | 0.07234           | 105     | 0.76              | 1.03              |
| Pons                            | 18     | 3.01067  | 3.05972           | 0.04905           | 80      | 0.86              | 1.15              |
| Medulla                         | 19     | 2.97664  | 3.08383           | 0.10719           | 154     | 0.76              | 1.02              |
| Cerebellum                      | 20     | 2.98525  | 3.25281           | 0.26756           | 404     | 0.79              | 1.07              |
| Superficial Nodes (2)           | 21     | 2.98303  | 3.03524           | 0.05221           | 2300    | 23.17             | 31.16             |
| Cervical Nodes (2)              | 22     | 2.98644  | 2.99864           | 0.01220           | 193     | 8.31              | 11.18             |
| Thyroid                         | 23     | 2.97026  | 2.99118           | 0.02092           | 1601    | 40.25             | 54.13             |
| Olfactory Epithelium            | 24     | 2.98471  | 3.05284           | 0.06813           | 20246   | 156.27            | 210.17            |
| Respiratory Epithelium          | 25     | 2.98148  | 3.06784           | 0.08636           | 4529766 | 27,583.78         | 37,096.52         |
| Axillary Nodes (2)              | 26     | 2.97833  | 2.99143           | 0.01310           | 25      | 0.98              | 1.32              |
| Muscle (R, deltoid)             | 27     | 2.96100  | 2.98748           | 0.02648           | 49      | 0.98              | 1.32              |
| Liver (R, superficial lobe)     | 28     | 2.97226  | 3.02939           | 0.05713           | 68      | 0.63              | 0.84              |
| Kidney (L, tip)                 | 29     | 2.98696  | 3.03470           | 0.04774           | 225     | 2.48              | 3.33              |
| Lung (R, top lobe)              | 30     | 2.97860  | 2.98977           | 0.01117           | 24      | 1.14              | 1.54              |
| Trachea (near cut-off)          | 31     | 3.03840  | 3.05491           | 0.01651           | 49      | 1.54              | 2.08              |
| Esophagus (near cut-off)        | 32     | 3.02042  | 3.03468           | 0.01426           | 50      | 1.85              | 2.49              |
| Spleen (tip)                    | 33     | 2.97479  | 3.00954           | 0.03475           | 62      | 0.94              | 1.27              |
| Heart                           | 34     | 2.97024  | 3.01440           | 0.04416           | 62      | 0.73              | 0.99              |
| Urine (fill to line of tube)    | 35     | 2.98836  | 3.25193           | 0.26357           | 2025    | 4.04              | 5.43              |
| Spinal Dura                     | 36     | 2.98537  | 2.99514           | 0.00977           | 37      | 2.00              | 2.69              |
| Lower Cervical Spinal Cord      | 37     | 2.98347  | 3.11603           | 0.13256           | 142     | 0.56              | 0.76              |
| Thoracic Spinal Cord            | 38     | 2.98152  | 3.09606           | 0.11454           | 95      | 0.44              | 0.59              |
| Lumbar Spinal Cord              | 39     | 2.95414  | 3.09879           | 0.14465           | 118     | 0.43              | 0.58              |
| Blood Sample                    | 40     | 3.06940  | 3.41364           | 0.34424           | 3390    | 5.18              | 6.96              |
| Drug Standard                   | 41     | 2.97560  | 2.97816           | 0.00256           | 3355732 | 0.00              | 0.00              |
| Drug Standard                   | 42     | 2.96919  | 2.97144           | 0.00225           | 3383130 | 0.00              | 0.00              |
| Drug Standard                   | 43     | 2.97702  | 2.97927           | 0.00225           | 3329599 | 0.00              | 0.00              |
| Circle of Willis/Basilar Artery | 44     | X        | X                 | X                 | X       | X                 | X                 |
| Renal Artery                    | 45     | X        | X                 | X                 | X       | X                 | X                 |
| Blank                           | 46     | 0.00000  | 0.00000           | 0.00000           | 2       | 0.00              | 0.00              |
| Blank                           | 47     | 0.00000  | 0.00000           | 0.00000           | 10      | 0.00              | 0.00              |
|                                 |        |          |                   |                   |         | 1.902<br>cpm/fmol | 1.414<br>cpm/fmol |

| Auto Calculations                                    | Enter Values                                |
|------------------------------------------------------|---------------------------------------------|
| Total uL of Dose Sol = 64.1947                       | Oxytocin Molecular Weight = <b>1007.190</b> |
| Hot mg = 0.0000                                      | Date of Synthesis = <b>39517.000</b>        |
| Cold mg = 0.0511                                     | Hot uCi/uL at Synthesis = <b>1.000</b>      |
| Total mg in Dose Sol = 0.0512                        | Hot uCi/ug at Synthesis = <b>2184.30</b>    |
| Conc Of Dose Sol (ug/uL) = 0.7969                    | Cold ug/uL = 20.00                          |
| Days after Synthesis Delivered = 14                  | Desired uCi = 41.0                          |
| Decay on Day Delivered = 0.8507                      | Desired mg = 0.040                          |
| Total uCi in Dose Sol on Day Delivered = 52.44       | Estimated Desired nmol = 397.1              |
| uCi/uL in Dose Sol on Day Delivered = 0.8168         | <b>Date of Delivery = 03/24/08</b>          |
| mg delivered = 0.040                                 | <b>uL delivered (actual) = 50.2</b>         |
| uCi delivered = 41.00                                | <b>Date of Counting = 03/24/08</b>          |
| Estimated nmol delivered = 39.71                     |                                             |
| Days after Synthesis Counted = 14                    | uL Hot to Deliver = 48.20                   |
| Decay on Day Counted = 0.8507                        | uL Cold to Deliver = 2.00                   |
| Specific Activity from Specs (cpm/fmol) = 1.902      | Total uL to Deliver = 50.19                 |
| Avg. Volume of Standard (uL)* = 3.0                  | Hot to Cold Ratio = 24.11                   |
| Avg. CPM-bkgd of Standard = 3,356,154                | Total uL to Make = 64.19                    |
| Specific Activity from Standards: (CPM/fmol) = 1.414 | Dose Solution uL Hot = 61.64                |
| Date of Disposal from Decay Storage = 10/31/09       | Dose Solution uL Cold = 2.56                |
| Average Background= 28.24                            | Efficiency of Counter= 82.97                |

**Table A06: 0.04 mg Intranasal Oxytocin Rat 51 Data**

| Trigemina Rat 51  | Route | Com-pound | Volume (uL) | uCi   | mg    | Time (min) | Perfused @ (min) |
|-------------------|-------|-----------|-------------|-------|-------|------------|------------------|
| Amount Delivered: | IN    | Oxytocin  | 50          | 41.00 | 0.040 | 14:00      | 30:07            |

  

| Tissue Description              | Tube # | Tube (g) | Tissue + Tube (g) | Tissue Weight (g) | CPM     | nM (Spec. Act.)   | nM (Stan.)        |
|---------------------------------|--------|----------|-------------------|-------------------|---------|-------------------|-------------------|
| Dorsal Dura                     | 1      | 2.99317  | 3.00429           | 0.01112           | 540     | 25.53             | 34.34             |
| Ventral Dura                    | 2      | 2.98079  | 3.00158           | 0.02079           | 1352    | 34.20             | 46.00             |
| Trigeminal Ganglion             | 3      | 2.97072  | 2.99642           | 0.02570           | 297     | 6.08              | 8.18              |
| Maxillary Nerve                 | 4      | 3.06195  | 3.07537           | 0.01342           | 226     | 8.85              | 11.91             |
| Ophthalmic Nerve                | 5      | 2.98869  | 2.99181           | 0.00312           | 44      | 7.40              | 9.95              |
| Mandibular Nerve                | 6      | 2.99946  | 3.00293           | 0.00347           | 46      | 6.99              | 9.40              |
| Upper Cervical Spinal Cord      | 7      | 3.00843  | 3.05620           | 0.04777           | 133     | 1.47              | 1.98              |
| Olfactory Bulbs                 | 8      | 2.96720  | 3.03490           | 0.06770           | 238     | 1.85              | 2.48              |
| Anterior Olfactory Nucleus      | 9      | 2.98584  | 3.02375           | 0.03791           | 86      | 1.19              | 1.60              |
| Frontal Cortex                  | 10     | 2.96492  | 3.00399           | 0.03907           | 117     | 1.58              | 2.12              |
| Caudate/Putamen                 | 11     | 3.00824  | 3.01839           | 0.01015           | 12      | 0.62              | 0.83              |
| Septal Nucleus                  | 12     | 2.98782  | 3.00398           | 0.01616           | 32      | 1.03              | 1.38              |
| Parietal Cortex                 | 13     | 2.99537  | 3.03911           | 0.04374           | 91      | 1.10              | 1.47              |
| Hippocampus                     | 14     | 2.97528  | 3.00843           | 0.03315           | 57      | 0.90              | 1.21              |
| Thalamus                        | 15     | 3.06547  | 3.12592           | 0.06045           | 98      | 0.85              | 1.15              |
| Hypothalamus                    | 16     | 2.99303  | 3.03208           | 0.03905           | 98      | 1.32              | 1.77              |
| Midbrain                        | 17     | 2.97316  | 3.09069           | 0.11753           | 277     | 1.24              | 1.67              |
| Pons                            | 18     | 2.99799  | 3.05381           | 0.05582           | 106     | 1.00              | 1.35              |
| Medulla                         | 19     | 2.99057  | 3.11812           | 0.12755           | 268     | 1.11              | 1.49              |
| Cerebellum                      | 20     | 2.98967  | 3.24829           | 0.25862           | 621     | 1.26              | 1.70              |
| Superficial Nodes (2)           | 21     | 2.99203  | 3.04719           | 0.05516           | 1896    | 18.07             | 24.30             |
| Cervical Nodes (2)              | 22     | 2.99907  | 3.00954           | 0.01047           | 277     | 13.89             | 18.68             |
| Thyroid                         | 23     | 2.98788  | 3.00491           | 0.01703           | 2814    | 86.89             | 116.86            |
| Olfactory Epithelium            | 24     | 2.99503  | 3.07199           | 0.07696           | 5153    | 35.21             | 47.35             |
| Respiratory Epithelium          | 25     | 2.96705  | 3.03449           | 0.06744           | 5353399 | 41,744.83         | 56,141.25         |
| Axillary Nodes (2)              | 26     | 2.99217  | 3.01255           | 0.02038           | 55      | 1.41              | 1.89              |
| Muscle (R, deltoid)             | 27     | 2.98113  | 3.01243           | 0.03130           | 95      | 1.60              | 2.15              |
| Liver (R, superficial lobe)     | 28     | 2.96056  | 3.00947           | 0.04891           | 113     | 1.21              | 1.63              |
| Kidney (L, tip)                 | 29     | 2.97475  | 3.00786           | 0.03311           | 115     | 1.82              | 2.45              |
| Lung (R, top lobe)              | 30     | 2.97743  | 2.98937           | 0.01194           | 35      | 1.54              | 2.07              |
| Trachea (near cut-off)          | 31     | 3.03253  | 3.05650           | 0.02397           | 152     | 3.32              | 4.47              |
| Esophagus (near cut-off)        | 32     | 2.98401  | 3.00172           | 0.01771           | 95      | 2.83              | 3.81              |
| Spleen (tip)                    | 33     | 2.94900  | 2.97266           | 0.02366           | 151     | 3.36              | 4.51              |
| Heart                           | 34     | 2.98129  | 3.01206           | 0.03077           | 60      | 1.03              | 1.39              |
| Urine (fill to line of tube)    | 35     | 2.94920  | 3.21505           | 0.26585           | 2903    | 5.74              | 7.72              |
| Spinal Dura                     | 36     | 2.97919  | 2.99349           | 0.01430           | 69      | 2.55              | 3.43              |
| Lower Cervical Spinal Cord      | 37     | 2.98858  | 3.14659           | 0.15801           | 218     | 0.72              | 0.97              |
| Thoracic Spinal Cord            | 38     | 2.98937  | 3.10937           | 0.12000           | 130     | 0.57              | 0.77              |
| Lumbar Spinal Cord              | 39     | 2.98455  | 3.13897           | 0.15442           | 192     | 0.65              | 0.88              |
| Blood Sample                    | 40     | 2.99402  | 3.24048           | 0.24646           | 3727    | 7.95              | 10.69             |
| Drug Standard                   | 41     | 2.97560  | 2.97816           | 0.00256           | 3355732 |                   |                   |
| Drug Standard                   | 42     | 2.96919  | 2.97144           | 0.00225           | 3383130 |                   |                   |
| Drug Standard                   | 43     | 2.97702  | 2.97927           | 0.00225           | 3329599 |                   |                   |
| Circle of Willis/Basilar Artery | 44     | 0.01165  | 0.01494           | 0.00329           | 635     | 101.55            | 136.57            |
| Renal Artery                    | 45     | 2.99626  | 3.00449           | 0.00823           | 28      | 1.81              | 2.43              |
| Blank                           | 46     |          |                   |                   | 2       |                   |                   |
| Blank                           | 47     |          |                   |                   | 10      |                   |                   |
|                                 |        |          |                   |                   |         | 1.902<br>cpm/fmol | 1.414<br>cpm/fmol |

| Auto Calculations                                    | Enter Values                        |
|------------------------------------------------------|-------------------------------------|
| Total uL of Dose Sol = 64.2                          | Oxytocin Molecular Weight = 1,007   |
| Hot mg = 0.0000                                      | Date of Synthesis = 03/10/08        |
| Cold mg = 0.0511                                     | Hot uCi/uL at Synthesis = 1,000     |
| Total mg in Dose Sol = 0.0512                        | Hot uCi/ug at Synthesis = 2184.30   |
| Conc Of Dose Sol (ug/uL) = 0.7969                    | Cold ug/uL = 20.00                  |
| Days after Synthesis Delivered = 14                  | Desired uCi = 41.0                  |
| Decay on Day Delivered = 0.8507                      | Desired mg = 0.040                  |
| Total uCi in Dose Sol on Day Delivered = 52.44       | Estimated Desired nmol = 397.1      |
| uCi/uL in Dose Sol on Day Delivered = 0.8168         | <b>Date of Delivery = 03/24/08</b>  |
| mg delivered = 0.040                                 | <b>uL delivered (actual) = 50.2</b> |
| uCi delivered = 41.00                                | <b>Date of Counting = 03/24/08</b>  |
| Estimated nmol delivered = 39.71                     | <b>Dose Calculator</b>              |
| Days after Synthesis Counted = 14                    | uL Hot to Deliver = 48.20           |
| Decay on Day Counted = 0.8507                        | uL Cold to Deliver = 2.00           |
| Specific Activity from Specs (cpm/fmol) = 1.902      | Total uL to Deliver = 50.19         |
| Avg. Volume of Standard (uL)* = 3.0                  | Hot to Cold Ratio = 24.11           |
| Avg. CPM-bkgd of Standard = 3,356,154                | Total uL to Make = 64.19            |
| Specific Activity from Standards: (CPM/fmol) = 1.414 | Dose Solution uL Hot = 61.64        |
| Date of Disposal from Decay Storage = 10/31/09       | Dose Solution uL Cold = 2.56        |
| Average Background= 25.80                            | Efficiency of Counter= 82.97        |

\*assume 3 uL

**Table A07: 0.04 mg Intranasal Oxytocin Rat 54 Data**

| Trigemina Rat 54  | Route | Com-pound | Volume (uL) | uCi   | mg    | Time (min) | Perfused @ (min) |
|-------------------|-------|-----------|-------------|-------|-------|------------|------------------|
| Amount Delivered: | IN    | Oxytocin  | 54          | 41.00 | 0.040 | 14:00      | 30:58            |

  

| Tissue Description              | Tube # | Tube (g) | Tissue + Tube (g) | Tissue Weight (g) | CPM     | nM (Spec. Act.)   | nM (Stan.)        |
|---------------------------------|--------|----------|-------------------|-------------------|---------|-------------------|-------------------|
| Dorsal Dura                     | 1      | 2.93231  | 2.94289           | 0.01058           | 102     | 5.07              | 7.10              |
| Ventral Dura                    | 2      | 2.95895  | 2.97274           | 0.01379           | 154     | 5.88              | 8.23              |
| Trigeminal Ganglion             | 3      | 2.97068  | 2.99751           | 0.02683           | 86      | 1.69              | 2.37              |
| Maxillary Nerve                 | 4      | 2.99796  | 3.01193           | 0.01397           | 85      | 3.19              | 4.47              |
| Ophthalmic Nerve                | 5      | 2.97888  | 2.98276           | 0.00388           | 50      | 6.81              | 9.54              |
| Mandibular Nerve                | 6      | 2.97117  | 2.97473           | 0.00356           | 43      | 6.38              | 8.93              |
| Upper Cervical Spinal Cord      | 7      | 2.97304  | 3.00415           | 0.03111           | 106     | 1.79              | 2.50              |
| Olfactory Bulbs                 | 8      | 2.96501  | 3.04788           | 0.08287           | 153     | 0.97              | 1.36              |
| Anterior Olfactory Nucleus      | 9      | 2.98365  | 3.02660           | 0.04295           | 54      | 0.66              | 0.93              |
| Frontal Cortex                  | 10     | 2.96633  | 3.00434           | 0.03801           | 58      | 0.80              | 1.12              |
| Caudate/Putamen                 | 11     | 2.95251  | 2.96452           | 0.01201           | 10      | 0.42              | 0.59              |
| Septal Nucleus                  | 12     | 2.96540  | 2.97530           | 0.00990           | 10      | 0.54              | 0.76              |
| Parietal Cortex                 | 13     | 2.98931  | 3.03371           | 0.04440           | 52      | 0.62              | 0.87              |
| Hippocampus                     | 14     | 2.97709  | 3.01910           | 0.04201           | 59      | 0.74              | 1.04              |
| Thalamus                        | 15     | 2.97711  | 3.05943           | 0.08232           | 81      | 0.52              | 0.72              |
| Hypothalamus                    | 16     | 2.95586  | 2.98580           | 0.02994           | 32      | 0.57              | 0.79              |
| Midbrain                        | 17     | 2.97673  | 3.08383           | 0.10710           | 116     | 0.57              | 0.80              |
| Pons                            | 18     | 2.99941  | 3.06825           | 0.06884           | 69      | 0.53              | 0.74              |
| Medulla                         | 19     | 2.98160  | 3.10639           | 0.12479           | 117     | 0.49              | 0.69              |
| Cerebellum                      | 20     | 2.94879  | 3.22441           | 0.27562           | 337     | 0.64              | 0.90              |
| Superficial Nodes (2)           | 21     | 2.98836  | 3.06034           | 0.06198           | 1566    | 13.28             | 18.60             |
| Cervical Nodes (2)              | 22     | 2.96623  | 2.97880           | 0.01257           | 318     | 13.27             | 18.59             |
| Thyroid                         | 23     | 2.99741  | 3.01818           | 0.02077           | 1973    | 49.92             | 69.92             |
| Olfactory Epithelium            | 24     | 2.95677  | 3.04304           | 0.08627           | 24275   | 147.88            | 207.11            |
| Respiratory Epithelium          | 25     | 2.97319  | 3.03173           | 0.05854           | 1287107 | 11,554.68         | 16,183.08         |
| Axillary Nodes (2)              | 26     | 2.96494  | 2.97916           | 0.01422           | 52      | 1.92              | 2.69              |
| Muscle (R. deltoid)             | 27     | 2.98567  | 3.00459           | 0.01892           | 38      | 1.05              | 1.47              |
| Liver (R, superficial lobe)     | 28     | 2.92716  | 2.95377           | 0.02661           | 27      | 0.54              | 0.75              |
| Kidney (L, tip)                 | 29     | 2.92259  | 2.93899           | 0.01640           | 42      | 1.35              | 1.88              |
| Lung (R, top lobe)              | 30     | 2.97639  | 2.98700           | 0.01061           | 18      | 0.90              | 1.26              |
| Trachea (near cut-off)          | 31     | 2.96325  | 2.98617           | 0.02292           | 61      | 1.40              | 1.97              |
| Esophagus (near cut-off)        | 32     | 2.95827  | 2.96467           | 0.00640           | 22      | 1.78              | 2.50              |
| Spleen (tip)                    | 33     | 2.94680  | 2.96638           | 0.01958           | 56      | 1.50              | 2.10              |
| Heart                           | 34     | 2.95836  | 2.97451           | 0.01615           | 25      | 0.81              | 1.14              |
| Urine (fill to line of tube)    | 35     | 2.96917  | 3.23326           | 0.26409           | 2345    | 4.67              | 6.54              |
| Spinal Dura                     | 36     | 2.94506  | 2.96430           | 0.01924           | 154     | 4.20              | 5.88              |
| Lower Cervical Spinal Cord      | 37     | 2.97051  | 3.12791           | 0.15740           | 125     | 0.42              | 0.58              |
| Thoracic Spinal Cord            | 38     | 2.96378  | 3.07670           | 0.11292           | 91      | 0.42              | 0.59              |
| Lumbar Spinal Cord              | 39     | 2.96376  | 3.08715           | 0.12339           | 92      | 0.39              | 0.55              |
| Blood Sample                    | 40     | 2.94669  | 3.20655           | 0.25986           | 3298    | 6.67              | 9.34              |
| Drug Standard                   | 41     | 2.97858  | 2.98082           | 0.00224           | 3076740 |                   |                   |
| Drug Standard                   | 42     | 2.95702  | 2.95926           | 0.00224           | 2982622 |                   |                   |
| Drug Standard                   | 43     | 2.97892  | 2.98112           | 0.00220           | 2893240 |                   |                   |
| Circle of Willis/Basilar Artery | 44     | 0.01123  | 0.01468           | 0.00345           | 13      | 2.03              | 2.84              |
| Renal Artery                    | 45     | 2.96072  | 2.96943           | 0.00871           | 28      | 1.69              | 2.37              |
| Blank                           | 46     |          |                   |                   | 6       |                   |                   |
| Blank                           | 47     |          |                   |                   | 8       |                   |                   |
|                                 |        |          |                   |                   |         | 1.903<br>cpm/fmol | 1.359<br>cpm/fmol |

| Auto Calculations                                    | Enter Values                        |
|------------------------------------------------------|-------------------------------------|
| Total uL of Dose Sol = 68.3                          | Oxytocin Molecular Weight = 1,007   |
| Hot mg = 0.0000                                      | Date of Synthesis = 03/10/08        |
| Cold mg = 0.0503                                     | Hot uCi/uL at Synthesis = 1,000     |
| Total mg in Dose Sol = 0.0503                        | Hot uCi/ug at Synthesis = 2184.30   |
| Conc Of Dose Sol (ug/uL) = 0.7373                    | Cold ug/uL = 20.00                  |
| Days after Synthesis Delivered = 21                  | Desired uCi = 41.0                  |
| Decay on Day Delivered = 0.7846                      | Desired mg = 0.040                  |
| Total uCi in Dose Sol on Day Delivered = 51.58       | Estimated Desired nmol = 397.1      |
| uCi/uL in Dose Sol on Day Delivered = 0.7557         | <b>Date of Delivery = 03/31/08</b>  |
| mg delivered = 0.040                                 | <b>uL delivered (actual) = 54.3</b> |
| uCi delivered = 41.00                                | <b>Date of Counting = 03/31/08</b>  |
| Estimated nmol delivered = 39.72                     | <b>Dose Calculator</b>              |
| Days after Synthesis Counted = 21                    | uL Hot to Deliver = 52.25           |
| Decay on Day Counted = 0.7846                        | uL Cold to Deliver = 2.00           |
| Specific Activity from Specs (cpm/fmol) = 1.903      | Total uL to Deliver = 54.25         |
| Avg. Volume of Standard (uL)* = 3.0                  | Hot to Cold Ratio = 26.14           |
| Avg. CPM-bkgd of Standard = 2,984,201                | Total uL to Make = 68.25            |
| Specific Activity from Standards: (CPM/fmol) = 1,359 | Dose Solution uL Hot = 65.74        |
| Date of Disposal from Decay Storage = 10/31/09       | Dose Solution uL Cold = 2.51        |
| Average Background= 25.96                            | Efficiency of Counter= 83.04        |

**Table A08: 0.04 mg Intranasal Oxytocin Rat 55 Data**

| Trigemina Rat 55  | Route | Com-pound | Volume (uL) | uCi   | mg    | Time (min) | Perfused @ (min) |
|-------------------|-------|-----------|-------------|-------|-------|------------|------------------|
| Amount Delivered: | IN    | Oxytocin  | 54          | 41.00 | 0.040 | 14:03      | 31:10            |

| Tissue Description              | Tube # | Tube (g) | Tissue + Tube (g) | Tissue Weight (g) | CPM     | nM (Spec. Act.)   | nM (Stan.)        |
|---------------------------------|--------|----------|-------------------|-------------------|---------|-------------------|-------------------|
| Dorsal Dura                     | 1      | 2.97903  | 2.99096           | 0.01193           | 262     | 11.53             | 16.25             |
| Ventral Dura                    | 2      | 2.98049  | 2.99097           | 0.01048           | 228     | 11.43             | 16.10             |
| Trigeminal Ganglion             | 3      | 2.94264  | 2.96434           | 0.02170           | 103     | 2.50              | 3.52              |
| Maxillary Nerve                 | 4      | 2.97538  | 2.99098           | 0.01560           | 95      | 3.20              | 4.51              |
| Ophthalmic Nerve                | 5      | 2.95205  | 2.95758           | 0.00553           | 36      | 3.40              | 4.79              |
| Mandibular Nerve                | 6      | 2.99823  | 3.00425           | 0.00602           | 47      | 4.10              | 5.78              |
| Upper Cervical Spinal Cord      | 7      | 2.93858  | 2.96564           | 0.02706           | 57      | 1.10              | 1.55              |
| Olfactory Bulbs                 | 8      | 2.97063  | 3.05223           | 0.08160           | 320     | 2.06              | 2.90              |
| Anterior Olfactory Nucleus      | 9      | 2.96547  | 3.01532           | 0.04985           | 97      | 1.03              | 1.45              |
| Frontal Cortex                  | 10     | 2.97895  | 3.02438           | 0.04543           | 114     | 1.32              | 1.85              |
| Caudate/Putamen                 | 11     | 2.96601  | 2.97790           | 0.01189           | 10      | 0.46              | 0.65              |
| Septal Nucleus                  | 12     | 2.95813  | 2.97881           | 0.02068           | 31      | 0.80              | 1.12              |
| Parietal Cortex                 | 13     | 2.93532  | 2.98973           | 0.05441           | 80      | 0.78              | 1.09              |
| Hippocampus                     | 14     | 2.95695  | 2.99549           | 0.03854           | 45      | 0.61              | 0.86              |
| Thalamus                        | 15     | 2.96929  | 3.03241           | 0.06312           | 85      | 0.71              | 1.00              |
| Hypothalamus                    | 16     | 2.97939  | 3.01497           | 0.03558           | 55      | 0.81              | 1.14              |
| Midbrain                        | 17     | 2.96119  | 3.08513           | 0.12394           | 161     | 0.68              | 0.96              |
| Pons                            | 18     | 2.96636  | 3.04219           | 0.07583           | 101     | 0.70              | 0.98              |
| Medulla                         | 19     | 2.96845  | 3.06476           | 0.09631           | 143     | 0.78              | 1.10              |
| Cerebellum                      | 20     | 2.98573  | 3.26840           | 0.28267           | 411     | 0.76              | 1.08              |
| Superficial Nodes (2)           | 21     | 2.93224  | 3.02468           | 0.09244           | 1328    | 7.55              | 10.64             |
| Cervical Nodes (2)              | 22     | 2.97694  | 2.99073           | 0.01379           | 125     | 4.77              | 6.72              |
| Thyroid                         | 23     | 2.93836  | 2.96952           | 0.03116           | 5775    | 97.38             | 137.25            |
| Olfactory Epithelium            | 24     | 2.95703  | 3.02701           | 0.06998           | 4382    | 32.90             | 46.37             |
| Respiratory Epithelium          | 25     | 2.96863  | 3.07872           | 0.11009           | 7326000 | 34,964.95         | 49,278.01         |
| Axillary Nodes (2)              | 26     | 2.94532  | 2.95990           | 0.01458           | 29      | 1.03              | 1.45              |
| Muscle (R, deltoid)             | 27     | 2.95283  | 2.99142           | 0.03859           | 55      | 0.75              | 1.06              |
| Liver (R, superficial lobe)     | 28     | 2.97723  | 2.99620           | 0.01897           | 32      | 0.89              | 1.26              |
| Kidney (L, tip)                 | 29     | 2.96436  | 2.98160           | 0.01724           | 43      | 1.30              | 1.83              |
| Lung (R, top lobe)              | 30     | 2.97026  | 2.97822           | 0.00796           | 28      | 1.84              | 2.59              |
| Trachea (near cut-off)          | 31     | 2.94458  | 2.96980           | 0.02522           | 76      | 1.62              | 2.28              |
| Esophagus (near cut-off)        | 32     | 2.97501  | 2.98716           | 0.01215           | 27      | 1.16              | 1.63              |
| Spleen (tip)                    | 33     | 2.94112  | 2.95612           | 0.01500           | 68      | 2.37              | 3.34              |
| Heart                           | 34     | 2.96802  | 2.98810           | 0.02008           | 32      | 0.83              | 1.17              |
| Urine (fill to line of tube)    | 35     | 2.95946  | 3.20461           | 0.24515           | 986     | 2.11              | 2.98              |
| Spinal Dura                     | 36     | 2.94104  | 2.94201           | 0.00097           | 2       | 1.19              | 1.68              |
| Lower Cervical Spinal Cord      | 37     | 2.93805  | 3.07286           | 0.13481           | 107     | 0.42              | 0.59              |
| Thoracic Spinal Cord            | 38     | 2.96842  | 3.10656           | 0.13814           | 89      | 0.34              | 0.48              |
| Lumbar Spinal Cord              | 39     | 2.94809  | 3.07143           | 0.12334           | 84      | 0.36              | 0.50              |
| Blood Sample                    | 40     | 2.94607  | 3.16897           | 0.22290           | 2324    | 5.48              | 7.72              |
| Drug Standard                   | 41     | 2.97858  | 2.98082           | 0.00224           | 3029961 |                   |                   |
| Drug Standard                   | 42     | 2.95702  | 2.95926           | 0.00224           | 2978113 |                   |                   |
| Drug Standard                   | 43     | 2.97892  | 2.98112           | 0.00220           | 2888698 |                   |                   |
| Circle of Willis/Basilar Artery | 44     | 0.01428  | 0.01687           | 0.00259           | 37      | 7.55              | 10.64             |
| Renal Artery                    | 45     | 2.96021  | 2.96625           | 0.00604           | 12      | 1.02              | 1.43              |
| Blank                           | 46     |          |                   |                   | 1       |                   |                   |
| Blank                           | 47     |          |                   |                   | 0       |                   |                   |
|                                 |        |          |                   |                   |         | 1.903<br>cpm/fmol | 1.350<br>cpm/fmol |

| Auto Calculations                                    | Enter Values                         |
|------------------------------------------------------|--------------------------------------|
| Total uL of Dose Sol = 68.3                          | Oxytocin Molecular Weight = 1,007    |
| Hot mg = 0.0000                                      | Date of Synthesis = 03/10/08         |
| Cold mg = 0.0503                                     | Hot uCi/uL at Synthesis = 1.000      |
| Total mg in Dose Sol = 0.0503                        | Hot uCi/ug at Synthesis = 2184.30    |
| Conc Of Dose Sol (ug/uL) = 0.7373                    | Cold ug/uL = 20.00                   |
| Days after Synthesis Delivered = 21                  | Desired uCi = 41.0                   |
| Decay on Day Delivered = 0.7846                      | Desired mg = 0.040                   |
| Total uCi in Dose Sol on Day Delivered = 51.58       | Estimated Desired nmol = 397.1       |
| uCi/uL in Dose Sol on Day Delivered = 0.7557         | <b>Date of Delivery = 03/31/08</b>   |
| mg delivered = 0.040                                 | <b>uL delivered (actual) = 54.25</b> |
| uCi delivered = 41.00                                | <b>Date of Counting = 03/31/08</b>   |
| Estimated nmol delivered = 39.71                     | <b>Dose Calculator</b>               |
| Days after Synthesis Counted = 21                    | uL Hot to Deliver = 52.25            |
| Decay on Day Counted = 0.7846                        | uL Cold to Deliver = 2.00            |
| Specific Activity from Specs (cpm/fmol) = 1.903      | Total uL to Deliver = 54.25          |
| Avg. Volume of Standard (uL)* = 3.0                  | Hot to Cold Ratio = 26.14            |
| Avg. CPM-bkgd of Standard = 2,965,590                | Total uL to Make = 68.25             |
| Specific Activity from Standards: (CPM/fmol) = 1.350 | Dose Solution uL Hot = 65.74         |
| Date of Disposal from Decay Storage = 10/31/09       | Dose Solution uL Cold = 2.51         |
| Average Background= 27.14                            | Efficiency of Counter= 83.04         |

\*assume 3 uL



**Table A09: 0.04 mg Intranasal Oxytocin Rat 58 Data**

| Trigemina Rat 58  | Route | Com-pound | Volume (uL) | uCi   | mg    | Time (min) | Perfused @ (min) |
|-------------------|-------|-----------|-------------|-------|-------|------------|------------------|
| Amount Delivered: | IN    | Oxytocin  | 55          | 41.00 | 0.040 | 14:00      | 30:45            |

  

| Tissue Description              | Tube # | Tube (g) | Tissue + Tube (g) | Tissue Weight (g) | CPM     | nM (Spec. Act.)   | nM (Stan.)        |
|---------------------------------|--------|----------|-------------------|-------------------|---------|-------------------|-------------------|
| Dorsal Dura                     | 1      | 2.95078  | 2.96507           | 0.01429           | 790     | 29.05             | 39.87             |
| Ventral Dura                    | 2      | 2.96680  | 2.97881           | 0.01201           | 354     | 15.47             | 21.24             |
| Trigeminal Ganglion             | 3      | 2.98498  | 3.01602           | 0.03104           | 139     | 2.36              | 3.24              |
| Maxillary Nerve                 | 4      | 3.01207  | 3.02825           | 0.01618           | 146     | 4.73              | 6.50              |
| Ophthalmic Nerve                | 5      | 2.98124  | 2.98531           | 0.00407           | 39      | 5.09              | 6.98              |
| Mandibular Nerve                | 6      | 3.00280  | 3.00657           | 0.00377           | 26      | 3.57              | 4.90              |
| Upper Cervical Spinal Cord      | 7      | 2.96182  | 3.00284           | 0.04102           | 91      | 1.17              | 1.61              |
| Olfactory Bulbs                 | 8      | 3.00703  | 3.09786           | 0.09083           | 625     | 3.61              | 4.96              |
| Anterior Olfactory Nucleus      | 9      | 2.97392  | 3.01389           | 0.03997           | 105     | 1.38              | 1.89              |
| Frontal Cortex                  | 10     | 2.97263  | 3.01711           | 0.04448           | 381     | 4.50              | 6.17              |
| Caudate/Putamen                 | 11     | 2.96598  | 2.97695           | 0.01097           | 19      | 0.89              | 1.22              |
| Septal Nucleus                  | 12     | 2.96926  | 2.98795           | 0.01869           | 20      | 0.57              | 0.79              |
| Parietal Cortex                 | 13     | 2.96702  | 3.02175           | 0.05473           | 149     | 1.43              | 1.96              |
| Hippocampus                     | 14     | 2.98877  | 3.02641           | 0.03784           | 102     | 1.43              | 1.96              |
| Thalamus                        | 15     | 2.97678  | 3.07981           | 0.10303           | 171     | 0.87              | 1.20              |
| Hypothalamus                    | 16     | 2.95973  | 2.98274           | 0.02301           | 29      | 0.66              | 0.90              |
| Midbrain                        | 17     | 2.95726  | 3.07364           | 0.11638           | 162     | 0.73              | 1.00              |
| Pons                            | 18     | 3.01024  | 3.08641           | 0.07617           | 100     | 0.69              | 0.95              |
| Medulla                         | 19     | 2.96166  | 3.07441           | 0.11275           | 175     | 0.82              | 1.12              |
| Cerebellum                      | 20     | 2.97711  | 3.26821           | 0.29110           | 443     | 0.80              | 1.10              |
| Superficial Nodes (2)           | 21     | 2.97961  | 3.02806           | 0.04845           | 1497    | 16.24             | 22.29             |
| Cervical Nodes (2)              | 22     | 2.98823  | 2.99454           | 0.00631           | 60      | 5.01              | 6.87              |
| Thyroid                         | 23     | 3.01010  | 3.03697           | 0.02687           | 2824    | 55.22             | 75.81             |
| Olfactory Epithelium            | 24     | 2.97400  | 3.06822           | 0.09422           | 14427   | 80.47             | 110.47            |
| Respiratory Epithelium          | 25     | 2.98633  | 3.06509           | 0.07876           | 6874502 | 45,870.28         | 62,972.48         |
| Axillary Nodes (2)              | 26     | 3.01071  | 3.02583           | 0.01512           | 28      | 0.98              | 1.35              |
| Muscle (R, deltoid)             | 27     | 2.96422  | 2.98303           | 0.01881           | 32      | 0.89              | 1.23              |
| Liver (R, superficial lobe)     | 28     | 2.95836  | 2.97454           | 0.01618           | 25      | 0.81              | 1.11              |
| Kidney (L, tip)                 | 29     | 2.96319  | 2.99990           | 0.03671           | 62      | 0.89              | 1.23              |
| Lung (R, top lobe)              | 30     | 2.97247  | 2.99218           | 0.01971           | 38      | 1.02              | 1.41              |
| Trachea (near cut-off)          | 31     | 2.96731  | 2.98403           | 0.01672           | 135     | 4.25              | 5.84              |
| Esophagus (near cut-off)        | 32     | 2.95452  | 2.98411           | 0.02959           | 112     | 1.99              | 2.74              |
| Spleen (tip)                    | 33     | 2.95789  | 2.97731           | 0.01942           | 53      | 1.43              | 1.96              |
| Heart                           | 34     | 2.95685  | 2.97891           | 0.02206           | 24      | 0.56              | 0.77              |
| Urine (fill to line of tube)    | 35     | 2.95188  | 3.21890           | 0.26702           | 1964    | 3.86              | 5.31              |
| Spinal Dura                     | 36     | 2.95802  | 2.96307           | 0.00505           | 0       | 0.00              | 0.00              |
| Lower Cervical Spinal Cord      | 37     | 2.94874  | 3.09489           | 0.14615           | 89      | 0.32              | 0.44              |
| Thoracic Spinal Cord            | 38     | 2.96661  | 3.08469           | 0.11808           | 61      | 0.27              | 0.38              |
| Lumbar Spinal Cord              | 39     | 2.96963  | 3.11406           | 0.14443           | 165     | 0.60              | 0.83              |
| Blood Sample                    | 40     | 2.97104  | 3.23549           | 0.26445           | 3202    | 6.36              | 8.73              |
| Drug Standard                   | 41     | 2.96857  | 2.97157           | 0.00300           | 2995236 |                   |                   |
| Drug Standard                   | 42     | 2.95233  | 2.95520           | 0.00287           | 2962188 |                   |                   |
| Drug Standard                   | 43     | 2.98869  | 2.99139           | 0.00270           | 2974948 |                   |                   |
| Circle of Willis/Basilar Artery | 44     | 2.94850  | 2.95224           | 0.00374           | 30      | 4.24              | 5.83              |
| Renal Artery                    | 45     | 2.97312  | 2.98510           | 0.01198           | 40      | 1.76              | 2.41              |
| Blank                           | 46     |          |                   |                   | 5       |                   |                   |
| Blank                           | 47     |          |                   |                   | 0       |                   |                   |
|                                 |        |          |                   |                   |         | 1.903<br>cpm/fmol | 1.386<br>cpm/fmol |

| Auto Calculations                                    | Enter Values                        |
|------------------------------------------------------|-------------------------------------|
| Total uL of Dose Sol = 69.5                          | Oxytocin Molecular Weight = 1,007   |
| Hot mg = 0.0000                                      | Date of Synthesis = 03/10/08        |
| Cold mg = 0.0501                                     | Hot uCi/uL at Synthesis = 1,000     |
| Total mg in Dose Sol = 0.0501                        | Hot uCi/ug at Synthesis = 2184.30   |
| Conc Of Dose Sol (ug/uL) = 0.7211                    | Cold ug/uL = 20.00                  |
| Days after Synthesis Delivered = 23                  | Desired uCi = 41.0                  |
| Decay on Day Delivered = 0.7667                      | Desired mg = 0.040                  |
| Total uCi in Dose Sol on Day Delivered = 51.35       | Estimated Desired nmol = 397.1      |
| uCi/uL in Dose Sol on Day Delivered = 0.7391         | <b>Date of Delivery = 04/02/08</b>  |
| mg delivered = 0.040                                 | <b>uL delivered (actual) = 55.5</b> |
| uCi delivered = 41.00                                | <b>Date of Counting = 04/02/08</b>  |
| Estimated nmol delivered = 39.72                     | <b>Dose Calculator</b>              |
| Days after Synthesis Counted = 23                    | uL Hot to Deliver = 53.48           |
| Decay on Day Counted = 0.7667                        | uL Cold to Deliver = 2.00           |
| Specific Activity from Specs (cpm/fmol) = 1.903      | Total uL to Deliver = 55.47         |
| Avg. Volume of Standard (uL)* = 3.0                  | Hot to Cold Ratio = 26.75           |
| Avg. CPM-bkgd of Standard = 2,977,457                | Total uL to Make = 69.47            |
| Specific Activity from Standards: (CPM/fmol) = 1,386 | Dose Solution uL Hot = 66.97        |
| Date of Disposal from Decay Storage = 10/31/09       | Dose Solution uL Cold = 2.50        |
| Average Background = 29.72                           | Efficiency of Counter = 83.04       |

\*assume 3 uL

**Table A10: 0.04 mg Intranasal Oxytocin Rat 59 Data**

| Trigemina Rat 59  | Route | Com-pound | Volume (uL) | uCi   | mg    | Time (min) | Perfused @ (min) |
|-------------------|-------|-----------|-------------|-------|-------|------------|------------------|
| Amount Delivered: | IN    | Oxytocin  | 55          | 41.00 | 0.040 | 14:00      | 30:40            |

| Tissue Description              | Tube # | Tube (g) | Tissue + Tube (g) | Tissue Weight (g) | CPM     | nM (Spec. Act.)   | nM (Stan.)        |
|---------------------------------|--------|----------|-------------------|-------------------|---------|-------------------|-------------------|
| Dorsal Dura                     | 1      | 3.01854  | 3.02787           | 0.00933           | 472     | 26.58             | 36.46             |
| Ventral Dura                    | 2      | 2.98492  | 2.98993           | 0.00501           | 106     | 11.13             | 15.26             |
| Trigeminal Ganglion             | 3      | 2.96298  | 2.98561           | 0.02263           | 129     | 3.00              | 4.12              |
| Maxillary Nerve                 | 4      | 2.98988  | 3.00223           | 0.01235           | 97      | 4.11              | 5.64              |
| Ophthalmic Nerve                | 5      | 2.95892  | 2.96302           | 0.00410           | 98      | 12.57             | 17.25             |
| Mandibular Nerve                | 6      | 2.96259  | 2.96688           | 0.00429           | 49      | 5.97              | 8.18              |
| Upper Cervical Spinal Cord      | 7      | 2.97467  | 3.02678           | 0.05211           | 105     | 1.06              | 1.45              |
| Olfactory Bulbs                 | 8      | 2.96749  | 3.03607           | 0.06858           | 517     | 3.96              | 5.43              |
| Anterior Olfactory Nucleus      | 9      | 2.96789  | 3.00625           | 0.03836           | 66      | 0.90              | 1.23              |
| Frontal Cortex                  | 10     | 2.98814  | 3.03284           | 0.04470           | 98      | 1.15              | 1.58              |
| Caudate/Putamen                 | 11     | 3.00685  | 3.01747           | 0.01062           | 14      | 0.71              | 0.97              |
| Septal Nucleus                  | 12     | 2.97957  | 2.99611           | 0.01654           | 22      | 0.70              | 0.96              |
| Parietal Cortex                 | 13     | 2.96927  | 3.02106           | 0.05179           | 79      | 0.80              | 1.10              |
| Hippocampus                     | 14     | 3.01504  | 3.05627           | 0.04123           | 50      | 0.64              | 0.88              |
| Thalamus                        | 15     | 2.98556  | 3.05324           | 0.06768           | 68      | 0.52              | 0.72              |
| Hypothalamus                    | 16     | 2.97265  | 2.99902           | 0.02637           | 44      | 0.88              | 1.21              |
| Midbrain                        | 17     | 3.01995  | 3.12653           | 0.10658           | 131     | 0.65              | 0.89              |
| Pons                            | 18     | 3.00370  | 3.06390           | 0.06020           | 81      | 0.71              | 0.97              |
| Medulla                         | 19     | 2.95575  | 3.07375           | 0.11800           | 187     | 0.83              | 1.14              |
| Cerebellum                      | 20     | 2.98175  | 3.22789           | 0.24614           | 340     | 0.73              | 1.00              |
| Superficial Nodes (2)           | 21     | 3.00301  | 3.06171           | 0.05870           | 1212    | 10.85             | 14.88             |
| Cervical Nodes (2)              | 22     | 3.02309  | 3.03384           | 0.01075           | 179     | 8.74              | 11.98             |
| Thyroid                         | 23     | 2.99363  | 3.02070           | 0.02707           | 3266    | 63.41             | 86.96             |
| Olfactory Epithelium            | 24     | 2.96627  | 3.01620           | 0.04993           | 1242    | 13.08             | 17.93             |
| Respiratory Epithelium          | 25     | 3.01019  | 3.09783           | 0.08764           | 4063873 | 24,368.77         | 33,422.30         |
| Axillary Nodes (2)              | 26     | 2.97014  | 2.98126           | 0.01112           | 28      | 1.32              | 1.81              |
| Muscle (R, deltoid)             | 27     | 2.95914  | 2.98070           | 0.02156           | 39      | 0.96              | 1.32              |
| Liver (R, superficial lobe)     | 28     | 2.98839  | 3.00759           | 0.01920           | 34      | 0.94              | 1.28              |
| Kidney (L, tip)                 | 29     | 2.94192  | 2.98214           | 0.04022           | 108     | 1.41              | 1.93              |
| Lung (R, top lobe)              | 30     | 2.98913  | 3.00536           | 0.01623           | 51      | 1.66              | 2.28              |
| Trachea (near cut-off)          | 31     | 2.98973  | 3.00956           | 0.01983           | 745     | 19.74             | 27.08             |
| Esophagus (near cut-off)        | 32     | 2.96249  | 2.98068           | 0.01819           | 66      | 1.91              | 2.62              |
| Spleen (tip)                    | 33     | 2.96907  | 2.99270           | 0.02363           | 61      | 1.37              | 1.87              |
| Heart                           | 34     | 2.94376  | 2.98261           | 0.03885           | 36      | 0.48              | 0.66              |
| Urine (fill to line of tube)    | 35     | 2.95774  | 3.21163           | 0.25389           | 1028    | 2.13              | 2.92              |
| Spinal Dura                     | 36     | 2.95141  | 2.96981           | 0.01840           | 48      | 1.37              | 1.88              |
| Lower Cervical Spinal Cord      | 37     | 2.96841  | 3.09051           | 0.12210           | 91      | 0.39              | 0.54              |
| Thoracic Spinal Cord            | 38     | 2.97356  | 3.06140           | 0.08784           | 47      | 0.28              | 0.38              |
| Lumbar Spinal Cord              | 39     | 2.95727  | 3.05940           | 0.10213           | 76      | 0.39              | 0.54              |
| Blood Sample                    | 40     | 2.95970  | 3.24014           | 0.28044           | 3339    | 6.26              | 8.58              |
| Drug Standard                   | 41     | 2.96857  | 2.97157           | 0.00300           | 3010291 |                   |                   |
| Drug Standard                   | 42     | 2.95233  | 2.95520           | 0.00287           | 2959285 |                   |                   |
| Drug Standard                   | 43     | 2.98869  | 2.99139           | 0.00270           | 2971371 |                   |                   |
| Circle of Willis/Basilar Artery | 44     | 2.97330  | 2.97611           | 0.00281           | 34      | 6.28              | 8.62              |
| Renal Artery                    | 45     | 2.97154  | 2.97806           | 0.00652           | 16      | 1.32              | 1.81              |
| Blank                           | 46     |          |                   |                   | 7       |                   |                   |
| Blank                           | 47     |          |                   |                   | 4       |                   |                   |
|                                 |        |          |                   |                   |         | 1.903<br>cpm/fmol | 1.387<br>cpm/fmol |

| Auto Calculations                                    | Enter Values                        |
|------------------------------------------------------|-------------------------------------|
| Total uL of Dose Sol = 69.5                          | Oxytocin Molecular Weight = 1,007   |
| Hot mg = 0.0000                                      | Date of Synthesis = 03/10/08        |
| Cold mg = 0.0501                                     | Hot uCi/uL at Synthesis = 1.000     |
| Total mg in Dose Sol = 0.0501                        | Hot uCi/ug at Synthesis = 2184.30   |
| Conc Of Dose Sol (ug/uL) = 0.7211                    | Cold ug/uL = 20.00                  |
| Days after Synthesis Delivered = 23                  | Desired uCi = 41.0                  |
| Decay on Day Delivered = 0.7667                      | Desired mg = 0.040                  |
| Total uCi in Dose Sol on Day Delivered = 51.35       | Estimated Desired nmol = 397.1      |
| uCi/uL in Dose Sol on Day Delivered = 0.7391         | <b>Date of Delivery = 04/02/08</b>  |
| mg delivered = 0.040                                 | <b>uL delivered (actual) = 55.5</b> |
| uCi delivered = 41.00                                | <b>Date of Counting = 04/02/08</b>  |
| Estimated nmol delivered = 39.72                     | <b>Dose Calculator</b>              |
| Days after Synthesis Counted = 23                    | uL Hot to Deliver = 53.48           |
| Decay on Day Counted = 0.7667                        | uL Cold to Deliver = 2.00           |
| Specific Activity from Specs (cpm/fmol) = 1.903      | Total uL to Deliver = 55.47         |
| Avg. Volume of Standard (uL)* = 3.0                  | Hot to Cold Ratio = 26.75           |
| Avg. CPM-bkgd of Standard = 2,980,316                | Total uL to Make = 69.47            |
| Specific Activity from Standards: (CPM/fmol) = 1.387 | Dose Solution uL Hot = 66.97        |
| Date of Disposal from Decay Storage = 10/31/09       | Dose Solution uL Cold = 2.50        |
| Average Background = 29.20                           | Efficiency of Counter = 83.04       |

\*assume 3 uL

## **Appendix B – 0.004 mg Intranasal Oxytocin Data**

### **Tables**

Table B01: Intranasal Oxytocin Rat 44 Data

Table B02: Intranasal Oxytocin Rat 45 Data

Table B03: Intranasal Oxytocin Rat 48 Data

Table B04: Intranasal Oxytocin Rat 49 Data

Table B05: Intranasal Oxytocin Rat 52 Data

Table B06: Intranasal Oxytocin Rat 53 Data

Table B07: Intranasal Oxytocin Rat 56 Data

Table B08: Intranasal Oxytocin Rat 57 Data

Table B09: Intranasal Oxytocin Rat 60 Data

Table B10: Intranasal Oxytocin Rat 61 Data

**Table B01: 0.004 mg Intranasal Oxytocin Rat 44 Data**

| Trigemina Rat 44  | Route | Compound | Volume (uL) | uCi   | mg    | Time (min) | Perfused @ (min) |
|-------------------|-------|----------|-------------|-------|-------|------------|------------------|
| Amount Delivered: | IN    | Oxytocin | 45          | 41.00 | 0.004 | 14:02      | 31:05            |

| Tissue Description           | Tube # | Tube (g) | Tissue + Tube (g) | Tissue Weight (g) | CPM     | nM (Spec. Act.)    | nM (Stan.)         |
|------------------------------|--------|----------|-------------------|-------------------|---------|--------------------|--------------------|
| Dorsal Dura                  | 1      | 2.98414  | 3.00256           | 0.01842           | 1859    | 5.30               | 7.71               |
| Ventral Dura                 | 2      | 2.98925  | 2.99973           | 0.01048           | 224     | 1.12               | 1.63               |
| Trigeminal Ganglion          | 3      | 2.98891  | 3.01176           | 0.02285           | 523     | 1.20               | 1.75               |
| Maxillary Nerve              | 4      | 2.98494  | 2.99580           | 0.01086           | 152     | 0.74               | 1.07               |
| Ophthalmic Nerve             | 5      | 2.97425  | 2.97723           | 0.00298           | 62      | 1.09               | 1.59               |
| Mandibular Nerve             | 6      | 3.02673  | 3.03093           | 0.00420           | 154     | 1.93               | 2.80               |
| Upper Cervical Spinal Cord   | 7      | 2.95224  | 2.99925           | 0.04701           | 404     | 0.45               | 0.66               |
| Olfactory Bulbs              | 8      | 2.97822  | 3.04949           | 0.07127           | 529     | 0.39               | 0.57               |
| Anterior Olfactory Nucleus   | 9      | 2.98274  | 3.02493           | 0.04219           | 151     | 0.19               | 0.27               |
| Frontal Cortex               | 10     | 2.95940  | 3.00130           | 0.04190           | 163     | 0.20               | 0.30               |
| Caudate/Putamen              | 11     | 3.00394  | 3.01621           | 0.01227           | 56      | 0.24               | 0.35               |
| Septal Nucleus               | 12     | 2.97741  | 2.98842           | 0.01101           | 42      | 0.20               | 0.29               |
| Parietal Cortex              | 13     | 2.97583  | 3.02578           | 0.04995           | 190     | 0.20               | 0.29               |
| Hippocampus                  | 14     | 2.98541  | 3.01572           | 0.03031           | 75      | 0.13               | 0.19               |
| Thalamus                     | 15     | 3.04342  | 3.11320           | 0.06978           | 206     | 0.16               | 0.23               |
| Hypothalamus                 | 16     | 2.98770  | 3.01631           | 0.02861           | 166     | 0.30               | 0.44               |
| Midbrain                     | 17     | 2.97922  | 3.08694           | 0.10772           | 541     | 0.26               | 0.38               |
| Pons                         | 18     | 3.03599  | 3.10368           | 0.06769           | 660     | 0.51               | 0.75               |
| Medulla                      | 19     | 2.95832  | 3.07013           | 0.11181           | 1152    | 0.54               | 0.79               |
| Cerebellum                   | 20     | 3.00124  | 3.25911           | 0.25787           | 1237    | 0.25               | 0.37               |
| Superficial Nodes (2)        | 21     | 2.97866  | 3.04182           | 0.06316           | 8653    | 7.20               | 10.47              |
| Cervical Nodes (2)           | 22     | 2.96180  | 2.97281           | 0.01101           | 790     | 3.77               | 5.48               |
| Thyroid                      | 23     | 2.97468  | 2.99595           | 0.02127           | 4520    | 11.16              | 16.23              |
| Olfactory Epithelium         | 24     | 2.99324  | 3.10790           | 0.11466           | 121299  | 55.56              | 80.81              |
| Respiratory Epithelium       | 25     | 2.98134  | 3.03066           | 0.04932           | 1734902 | 1,847.38           | 2,687.13           |
| Axillary Nodes (2)           | 26     | 2.97049  | 3.00006           | 0.02957           | 125     | 0.22               | 0.32               |
| Muscle (R, deltoid)          | 27     | 2.96775  | 2.99898           | 0.03123           | 110     | 0.18               | 0.27               |
| Liver (R, superficial lobe)  | 28     | 2.96691  | 2.99433           | 0.02742           | 176     | 0.34               | 0.49               |
| Kidney (L, tip)              | 29     | 2.96703  | 2.99087           | 0.02384           | 180     | 0.40               | 0.58               |
| Lung (R, top lobe)           | 30     | 2.96479  | 2.98672           | 0.02193           | 452     | 1.08               | 1.58               |
| Trachea (near cut-off)       | 31     | 2.94715  | 2.96432           | 0.01717           | 117     | 0.36               | 0.52               |
| Esophagus (near cut-off)     | 32     | 2.96802  | 2.98031           | 0.01229           | 157     | 0.67               | 0.98               |
| Spleen (tip)                 | 33     | 2.95165  | 2.98265           | 0.03100           | 262     | 0.44               | 0.64               |
| Heart                        | 34     | 2.97633  | 2.99712           | 0.02079           | 800     | 2.02               | 2.94               |
| Urine (fill to line of tube) | 35     | 3.00183  | 3.15122           | 0.14939           | 2870    | 1.01               | 1.47               |
| Spinal Dura                  | 36     | 2.94560  | 2.95130           | 0.00570           | 92      | 0.84               | 1.23               |
| Lower Cervical Spinal Cord   | 37     | 2.94408  | 3.07239           | 0.12831           | 310     | 0.13               | 0.18               |
| Thoracic Spinal Cord         | 38     | 2.97814  | 3.06944           | 0.09130           | 162     | 0.09               | 0.14               |
| Lumbar Spinal Cord           | 39     | 2.96796  | 3.08834           | 0.12038           | 245     | 0.11               | 0.16               |
| Blood Sample                 | 40     | 2.98465  | 3.31318           | 0.32853           | 8129    | 1.30               | 1.89               |
| Drug Standard                | 41     | 2.96490  | 2.96748           | 0.00258           | 3430124 |                    |                    |
| Drug Standard                | 42     | 2.98813  | 2.99060           | 0.00247           | 3540001 |                    |                    |
| Drug Standard                | 43     | 3.00200  | 3.00457           | 0.00257           | 3370583 |                    |                    |
|                              |        |          |                   |                   |         | 19.041<br>cpm/fmol | 13.091<br>cpm/fmol |

| Auto Calculations                                     | Enter Values                         |
|-------------------------------------------------------|--------------------------------------|
| Total uL of Dose Sol = 59.2                           | Oxytocin Molecular Weight = 1,007    |
| Hot mg = 0.0000                                       | Date of Synthesis = 03/10/08         |
| Cold mg = 0.0052                                      | Hot uCi/uL at Synthesis = 1.000      |
| Total mg in Dose Sol = 0.0052                         | Hot uCi/ug at Synthesis = 2184.30    |
| Conc Of Dose Sol (ug/uL) = 0.0884                     | Cold ug/uL = 5.00                    |
| Days after Synthesis Delivered = 7                    | Desired uCi = 41.0                   |
| Decay on Day Delivered = 0.9223                       | Desired mg = 0.004                   |
| Total uCi in Dose Sol on Day Delivered = 53.69        | Estimated Desired nmol = 4.0         |
| uCi/uL in Dose Sol on Day Delivered = 0.9061          | <b>Date of Delivery = 03/17/08</b>   |
| mg delivered = 0.004                                  | <b>uL delivered (actual) = 45.25</b> |
| uCi delivered = 41.00                                 | <b>Date of Counting = 03/17/08</b>   |
| Estimated nmol delivered = 3.97                       | <b>Dose Calculator</b>               |
| Days after Synthesis Counted = 7                      | uL Hot to Deliver = 44.45            |
| Decay on Day Counted = 0.9223                         | uL Cold to Deliver = 0.80            |
| Specific Activity from Specs (cpm/fmol) = 19.041      | Total uL to Deliver = 45.25          |
| Avg. Volume of Standard (uL)* = 3.0                   | Hot to Cold Ratio = 55.85            |
| Avg. CPM-bkgd of Standard = 3,446,903                 | Total uL to Make = 59.25             |
| Specific Activity from Standards: (CPM/fmol) = 13.091 | Dose Solution uL Hot = 58.21         |
| Date of Disposal from Decay Storage = 10/31/09        | Dose Solution uL Cold = 1.04         |
| Average Background = 25.00                            | Efficiency of Counter = 83.08        |

\*assume 3 uL

**Table B02: 0.004 mg Intranasal Oxytocin Rat 45 Data**

| Trigemina Rat 45  | Route | Compound | Volume (uL) | uCi   | mg    | Time (min) | Perfused @ (min) |
|-------------------|-------|----------|-------------|-------|-------|------------|------------------|
| Amount Delivered: | IN    | Oxytocin | 45          | 41.00 | 0.004 | 14:00      | 31:00            |

| Tissue Description           | Tube # | Tube (g) | Tissue + Tube (g) | Tissue Weight (g) | CPM     | nM (Spec. Act.)    | nM (Stan.)         |
|------------------------------|--------|----------|-------------------|-------------------|---------|--------------------|--------------------|
| Dorsal Dura                  | 1      | 3.03604  | 3.04928           | 0.01324           | 1102    | 4.37               | 6.36               |
| Ventral Dura                 | 2      | 2.99912  | 3.00621           | 0.00709           | 157     | 1.16               | 1.69               |
| Trigeminal Ganglion          | 3      | 2.95925  | 2.98360           | 0.02435           | 460     | 0.99               | 1.44               |
| Maxillary Nerve              | 4      | 2.95927  | 2.97646           | 0.01719           | 727     | 2.22               | 3.23               |
| Ophthalmic Nerve             | 5      | 2.97412  | 2.97716           | 0.00304           | 157     | 2.72               | 3.96               |
| Mandibular Nerve             | 6      | 2.98688  | 2.99045           | 0.00357           | 102     | 1.50               | 2.19               |
| Upper Cervical Spinal Cord   | 7      | 2.98645  | 3.02411           | 0.03766           | 94      | 0.13               | 0.19               |
| Olfactory Bulbs              | 8      | 2.97426  | 3.04741           | 0.07315           | 636     | 0.46               | 0.66               |
| Anterior Olfactory Nucleus   | 9      | 2.98121  | 3.02102           | 0.03981           | 293     | 0.39               | 0.56               |
| Frontal Cortex               | 10     | 2.96916  | 3.01340           | 0.04424           | 184     | 0.22               | 0.32               |
| Caudate/Putamen              | 11     | 2.98701  | 2.99897           | 0.01196           | 28      | 0.12               | 0.18               |
| Septal Nucleus               | 12     | 2.95779  | 2.96837           | 0.01058           | 29      | 0.14               | 0.21               |
| Parietal Cortex              | 13     | 2.99155  | 3.03637           | 0.04482           | 142     | 0.17               | 0.24               |
| Hippocampus                  | 14     | 2.96058  | 3.00087           | 0.04029           | 86      | 0.11               | 0.16               |
| Thalamus                     | 15     | 2.98499  | 3.06697           | 0.08198           | 164     | 0.11               | 0.15               |
| Hypothalamus                 | 16     | 3.00477  | 3.03185           | 0.02708           | 79      | 0.15               | 0.22               |
| Midbrain                     | 17     | 2.98305  | 3.08768           | 0.10463           | 260     | 0.13               | 0.19               |
| Pons                         | 18     | 2.99736  | 3.06590           | 0.06854           | 166     | 0.13               | 0.19               |
| Medulla                      | 19     | 2.98082  | 3.07752           | 0.09670           | 266     | 0.14               | 0.21               |
| Cerebellum                   | 20     | 2.97122  | 3.23126           | 0.26004           | 663     | 0.13               | 0.19               |
| Superficial Nodes (2)        | 21     | 2.97586  | 3.04111           | 0.06525           | 5708    | 4.59               | 6.68               |
| Cervical Nodes (2)           | 22     | 2.97333  | 2.98796           | 0.01463           | 570     | 2.04               | 2.97               |
| Thyroid                      | 23     | 2.97849  | 3.00334           | 0.02485           | 4125    | 8.72               | 12.68              |
| Olfactory Epithelium         | 24     | 2.97791  | 3.07827           | 0.10036           | 305640  | 159.94             | 232.64             |
| Respiratory Epithelium       | 25     | 2.97686  | 3.02862           | 0.05176           | 8241971 | 8,362.61           | 12,163.93          |
| Axillary Nodes (2)           | 26     | 2.98301  | 3.00965           | 0.02664           | 130     | 0.26               | 0.37               |
| Muscle (R, deltoid)          | 27     | 2.97291  | 3.00320           | 0.03029           | 107     | 0.19               | 0.27               |
| Liver (R, superficial lobe)  | 28     | 2.96272  | 2.99233           | 0.02961           | 125     | 0.22               | 0.32               |
| Kidney (L, tip)              | 29     | 2.96579  | 3.00845           | 0.04266           | 316     | 0.39               | 0.57               |
| Lung (R, top lobe)           | 30     | 2.98229  | 3.00153           | 0.01924           | 101     | 0.28               | 0.40               |
| Trachea (near cut-off)       | 31     | 2.98340  | 3.00265           | 0.01925           | 175     | 0.48               | 0.69               |
| Esophagus (near cut-off)     | 32     | 2.97259  | 2.98762           | 0.01503           | 180     | 0.63               | 0.91               |
| Spleen (tip)                 | 33     | 2.94896  | 2.98555           | 0.03659           | 226     | 0.32               | 0.47               |
| Heart                        | 34     | 2.96921  | 2.99880           | 0.02959           | 101     | 0.18               | 0.26               |
| Urine (fill to line of tube) | 35     | 2.96316  | 3.08997           | 0.12681           | 1162    | 0.48               | 0.70               |
| Spinal Dura                  | 36     | 2.96848  | 2.97428           | 0.00580           | 43      | 0.39               | 0.56               |
| Lower Cervical Spinal Cord   | 37     | 2.97932  | 3.11443           | 0.13511           | 213     | 0.08               | 0.12               |
| Thoracic Spinal Cord         | 38     | 2.95062  | 3.04611           | 0.09549           | 148     | 0.08               | 0.12               |
| Lumbar Spinal Cord           | 39     | 2.98554  | 3.11382           | 0.12828           | 188     | 0.08               | 0.11               |
| Blood Sample                 | 40     | 3.00265  | 3.22093           | 0.21828           | 5023    | 1.21               | 1.76               |
| Drug Standard                | 41     | 2.96490  | 2.96748           | 0.00258           | 3430124 |                    |                    |
| Drug Standard                | 42     | 2.98813  | 2.99060           | 0.00247           | 3540001 |                    |                    |
| Drug Standard                | 43     | 3.00200  | 3.00457           | 0.00257           | 3370583 |                    |                    |
|                              |        |          |                   |                   |         | 19.041<br>cpm/fmol | 13.091<br>cpm/fmol |

| Auto Calculations                                     | Enter Values                      |
|-------------------------------------------------------|-----------------------------------|
| Total uL of Dose Sol = 59.2                           | Oxytocin Molecular Weight = 1,007 |
| Hot mg = 0.0000                                       | Date of Synthesis = 03/10/08      |
| Cold mg = 0.0052                                      | Hot uCi/uL at Synthesis = 1.000   |
| Total mg in Dose Sol = 0.0052                         | Hot uCi/ug at Synthesis = 2184.30 |
| Conc Of Dose Sol (ug/uL) = 0.0884                     | Cold ug/uL = 5.00                 |
| Days after Synthesis Delivered = 7                    | Desired uCi = 41.0                |
| Decay on Day Delivered = 0.9223                       | Desired mg = 0.004                |
| Total uCi in Dose Sol on Day Delivered = 53.69        | Estimated Desired nmol = 4.0      |
| uCi/uL in Dose Sol on Day Delivered = 0.9061          | Date of Delivery = 03/17/08       |
| mg delivered = 0.004                                  | uL delivered (actual) = 45.25     |
| uCi delivered = 41.00                                 | Date of Counting = 03/17/08       |
| Estimated nmol delivered = 3.97                       | <b>Dose Calculator</b>            |
| Days after Synthesis Counted = 7                      | uL Hot to Deliver = 44.45         |
| Decay on Day Counted = 0.9223                         | uL Cold to Deliver = 0.80         |
| Specific Activity from Specs (cpm/fmol) = 19.041      | Total uL to Deliver = 45.25       |
| Avg. Volume of Standard (uL)* = 3.0                   | Hot to Cold Ratio = 55.85         |
| Avg. CPM-bkgd of Standard = 3,446,903                 | Total uL to Make = 59.25          |
| Specific Activity from Standards: (CPM/fmol) = 13.091 | Dose Solution uL Hot = 58.21      |
| Date of Disposal from Decay Storage = 10/31/09        | Dose Solution uL Cold = 1.04      |
| Average Background = 25.00                            | Efficiency of Counter = 83.08     |

\*assume 3 uL

**Table B03: 0.004 mg Intranasal Oxytocin Rat 48 Data**

| Trigemina Rat 48  | Route | Compound | Volume (uL) | uCi   | mg    | Time (min) | Perfused @ (min) |
|-------------------|-------|----------|-------------|-------|-------|------------|------------------|
| Amount Delivered: | IN    | Oxytocin | 47          | 41.00 | 0.004 | 13:58      | 31:02            |

| Tissue Description           | Tube # | Tube (g) | Tissue + Tube (g) | Tissue Weight (g) | CPM     | nM (Spec. Act.) | nM (Stan.) |
|------------------------------|--------|----------|-------------------|-------------------|---------|-----------------|------------|
| Dorsal Dura                  | 1      | 2.97590  | 2.98682           | 0.01092           | 103     | 0.50            | 0.76       |
| Ventral Dura                 | 2      | 2.99145  | 3.00518           | 0.01373           | 197     | 0.75            | 1.14       |
| Trigeminal Ganglion          | 3      | 2.98722  | 3.00970           | 0.02248           | 607     | 1.42            | 2.15       |
| Maxillary Nerve              | 4      | 2.98747  | 3.00041           | 0.01294           | 114     | 0.46            | 0.70       |
| Ophthalmic Nerve             | 5      | 2.98993  | 2.99451           | 0.00458           | 33      | 0.38            | 0.58       |
| Mandibular Nerve             | 6      | 2.95482  | 2.95763           | 0.00281           | 425     | 7.96            | 12.08      |
| Upper Cervical Spinal Cord   | 7      | 2.96278  | 3.00134           | 0.03856           | 115     | 0.16            | 0.24       |
| Olfactory Bulbs              | 8      | 3.00811  | 3.07331           | 0.06520           | 528     | 0.43            | 0.65       |
| Anterior Olfactory Nucleus   | 9      | 2.98866  | 3.03674           | 0.04808           | 129     | 0.14            | 0.21       |
| Frontal Cortex               | 10     | 3.00038  | 3.03738           | 0.03700           | 114     | 0.16            | 0.24       |
| Caudate/Putamen              | 11     | 2.98630  | 2.99739           | 0.01109           | 16      | 0.07            | 0.11       |
| Septal Nucleus               | 12     | 2.99600  | 2.99909           | 0.00309           | 4       | 0.06            | 0.09       |
| Parietal Cortex              | 13     | 2.99685  | 3.05172           | 0.05487           | 147     | 0.14            | 0.21       |
| Hippocampus                  | 14     | 3.06065  | 3.09460           | 0.03395           | 64      | 0.10            | 0.15       |
| Thalamus                     | 15     | 2.98203  | 3.05620           | 0.07417           | 123     | 0.09            | 0.13       |
| Hypothalamus                 | 16     | 2.98413  | 3.01329           | 0.02916           | 62      | 0.11            | 0.17       |
| Midbrain                     | 17     | 3.06089  | 3.16404           | 0.10315           | 230     | 0.12            | 0.18       |
| Pons                         | 18     | 2.99393  | 3.05806           | 0.06413           | 177     | 0.15            | 0.22       |
| Medulla                      | 19     | 2.98372  | 3.09572           | 0.11200           | 277     | 0.13            | 0.20       |
| Cerebellum                   | 20     | 3.00533  | 3.25092           | 0.24559           | 474     | 0.10            | 0.15       |
| Superficial Nodes (2)        | 21     | 2.98543  | 3.05920           | 0.07377           | 3777    | 2.69            | 4.09       |
| Cervical Nodes (2)           | 22     | 2.98462  | 2.99178           | 0.00716           | 187     | 1.37            | 2.08       |
| Thyroid                      | 23     | 2.99132  | 3.01572           | 0.02440           | 4571    | 9.86            | 14.95      |
| Olfactory Epithelium         | 24     | 2.99315  | 3.07361           | 0.08046           | 15433   | 10.09           | 15.31      |
| Respiratory Epithelium       | 25     | 2.98535  | 3.04918           | 0.06383           | 2773508 | 2,286.37        | 3,467.79   |
| Axillary Nodes (2)           | 26     | 2.98877  | 3.00394           | 0.01517           | 73      | 0.25            | 0.38       |
| Muscle (R, deltoid)          | 27     | 2.97676  | 2.99224           | 0.01548           | 49      | 0.17            | 0.25       |
| Liver (R, superficial lobe)  | 28     | 3.01972  | 3.05078           | 0.03106           | 118     | 0.20            | 0.30       |
| Kidney (L, tip)              | 29     | 2.98417  | 3.01962           | 0.03545           | 105     | 0.16            | 0.24       |
| Lung (R, top lobe)           | 30     | 2.97634  | 2.98796           | 0.01162           | 59      | 0.27            | 0.40       |
| Trachea (near cut-off)       | 31     | 2.98581  | 3.00273           | 0.01692           | 78      | 0.24            | 0.37       |
| Esophagus (near cut-off)     | 32     | 2.95300  | 2.97087           | 0.01787           | 1357    | 3.99            | 6.06       |
| Spleen (tip)                 | 33     | 2.94784  | 2.97488           | 0.02704           | 79      | 0.15            | 0.23       |
| Heart                        | 34     | 2.96851  | 2.99843           | 0.02992           | 85      | 0.15            | 0.23       |
| Urine (fill to line of tube) | 35     | 2.98666  | 3.22285           | 0.23619           | 1441    | 0.32            | 0.49       |
| Spinal Dura                  | 36     | 2.97546  | 2.98716           | 0.01170           | 87      | 0.39            | 0.59       |
| Lower Cervical Spinal Cord   | 37     | 2.98804  | 3.13026           | 0.14222           | 155     | 0.06            | 0.09       |
| Thoracic Spinal Cord         | 38     | 2.97859  | 3.08360           | 0.10501           | 111     | 0.06            | 0.08       |
| Lumbar Spinal Cord           | 39     | 2.95079  | 3.08034           | 0.12955           | 198     | 0.08            | 0.12       |
| Blood Sample                 | 40     | 2.97054  | 3.26676           | 0.29622           | 5377    | 0.96            | 1.45       |
| Drug Standard                | 41     | 2.98211  | 2.98530           | 0.00319           | 3241197 |                 |            |
| Drug Standard                | 42     | 2.97255  | 2.97532           | 0.00277           | 3145247 |                 |            |
| Drug Standard                | 43     | 2.97440  | 2.97701           | 0.00261           | 3180032 |                 |            |
|                              |        |          |                   |                   |         | 19.005          | 12.530     |
|                              |        |          |                   |                   |         | cpm/fmol        | cpm/fmol   |

| Auto Calculations                                     | Enter Values                         |
|-------------------------------------------------------|--------------------------------------|
| Total uL of Dose Sol = 60.8                           | Oxytocin Molecular Weight = 1,007    |
| Hot mg = 0.0000                                       | Date of Synthesis = 03/10/08         |
| Cold mg = 0.0052                                      | Hot uCi/uL at Synthesis = 1.000      |
| Total mg in Dose Sol = 0.0052                         | Hot uCi/ug at Synthesis = 2184.30    |
| Conc Of Dose Sol (ug/uL) = 0.0854                     | Cold ug/uL = 5.00                    |
| Days after Synthesis Delivered = 10                   | Desired uCi = 41.0                   |
| Decay on Day Delivered = 0.8909                       | Desired mg = 0.004                   |
| Total uCi in Dose Sol on Day Delivered = 53.26        | Estimated Desired nmol = 4.0         |
| uCi/uL in Dose Sol on Day Delivered = 0.8758          | <b>Date of Delivery = 03/20/08</b>   |
| mg delivered = 0.004                                  | <b>uL delivered (actual) = 46.82</b> |
| uCi delivered = 41.00                                 | <b>Date of Counting = 03/20/08</b>   |
| Estimated nmol delivered = 3.97                       | <b>Dose Calculator</b>               |
| Days after Synthesis Counted = 10                     | uL Hot to Deliver = 46.02            |
| Decay on Day Counted = 0.8909                         | uL Cold to Deliver = 0.80            |
| Specific Activity from Specs (cpm/fmol) = 19.005      | Total uL to Deliver = 46.82          |
| Avg. Volume of Standard (uL)* = 3.0                   | Hot to Cold Ratio = 57.83            |
| Avg. CPM-bkgd of Standard = 3,188,825                 | Total uL to Make = 60.82             |
| Specific Activity from Standards: (CPM/fmol) = 12.530 | Dose Solution uL Hot = 59.78         |
| Date of Disposal from Decay Storage = 10/31/09        | Dose Solution uL Cold = 1.03         |
| Average Background = 25.00                            | Efficiency of Counter = 82.92        |

\*assume 3 uL

**Table B04: 0.004 mg Intranasal Oxytocin Rat 49 Data**

| Trigemina Rat 49  | Route | Compound | Volume (uL) | uCi   | mg    | Time (min) | Perfused @ (min) |
|-------------------|-------|----------|-------------|-------|-------|------------|------------------|
| Amount Delivered: | IN    | Oxytocin | 47          | 41.00 | 0.004 | 14:06      | 30:35            |

| Tissue Description              | Tube # | Tube (g) | Tissue + Tube (g) | Tissue Weight (g) | CPM     | nM (Spec. Act.)    | nM (Stan.)         |
|---------------------------------|--------|----------|-------------------|-------------------|---------|--------------------|--------------------|
| Dorsal Dura                     | 1      | 2.98911  | 3.00515           | 0.01604           | 588     | 1.93               | 2.93               |
| Ventral Dura                    | 2      | 3.00608  | 3.01794           | 0.01186           | 224     | 0.99               | 1.51               |
| Trigeminal Ganglion             | 3      | 2.97585  | 3.00089           | 0.02504           | 436     | 0.92               | 1.39               |
| Maxillary Nerve                 | 4      | 2.98694  | 3.00157           | 0.01463           | 769     | 2.76               | 4.19               |
| Ophthalmic Nerve                | 5      | 2.95829  | 2.96230           | 0.00401           | 102     | 1.33               | 2.02               |
| Mandibular Nerve                | 6      | 3.02816  | 3.03075           | 0.00259           | 41      | 0.82               | 1.25               |
| Upper Cervical Spinal Cord      | 7      | 2.95549  | 2.99095           | 0.03546           | 121     | 0.18               | 0.27               |
| Olfactory Bulbs                 | 8      | 2.98457  | 3.05718           | 0.07261           | 405     | 0.29               | 0.45               |
| Anterior Olfactory Nucleus      | 9      | 2.98536  | 3.03009           | 0.04473           | 109     | 0.13               | 0.19               |
| Frontal Cortex                  | 10     | 2.98740  | 3.03023           | 0.04283           | 108     | 0.13               | 0.20               |
| Caudate/Putamen                 | 11     | 2.98610  | 2.99791           | 0.01181           | 22      | 0.10               | 0.15               |
| Septal Nucleus                  | 12     | 2.97598  | 2.99197           | 0.01599           | 29      | 0.10               | 0.14               |
| Parietal Cortex                 | 13     | 2.95987  | 3.01012           | 0.05025           | 117     | 0.12               | 0.19               |
| Hippocampus                     | 14     | 2.97800  | 3.01141           | 0.03341           | 50      | 0.08               | 0.12               |
| Thalamus                        | 15     | 2.99678  | 3.06457           | 0.06779           | 118     | 0.09               | 0.14               |
| Hypothalamus                    | 16     | 2.95924  | 2.99331           | 0.03407           | 85      | 0.13               | 0.20               |
| Midbrain                        | 17     | 2.98373  | 3.08353           | 0.09980           | 191     | 0.10               | 0.15               |
| Pons                            | 18     | 2.99060  | 3.06245           | 0.07185           | 164     | 0.12               | 0.18               |
| Medulla                         | 19     | 2.96564  | 3.06645           | 0.10081           | 247     | 0.13               | 0.20               |
| Cerebellum                      | 20     | 2.99302  | 3.24258           | 0.24956           | 530     | 0.11               | 0.17               |
| Superficial Nodes (2)           | 21     | 2.99466  | 3.09319           | 0.09853           | 7839    | 4.19               | 6.35               |
| Cervical Nodes (2)              | 22     | 2.98745  | 2.99949           | 0.01204           | 485     | 2.12               | 3.21               |
| Thyroid                         | 23     | 2.97372  | 2.99918           | 0.02546           | 3785    | 7.82               | 11.87              |
| Olfactory Epithelium            | 24     | 2.98396  | 3.07670           | 0.09274           | 13676   | 7.76               | 11.77              |
| Respiratory Epithelium          | 25     | 3.07142  | 3.14207           | 0.07065           | 1910911 | 1,423.21           | 2,158.62           |
| Axillary Nodes (2)              | 26     | 2.96590  | 2.97844           | 0.01254           | 55      | 0.23               | 0.35               |
| Muscle (R, deltoid)             | 27     | 2.97860  | 3.00426           | 0.02566           | 104     | 0.21               | 0.32               |
| Liver (R, superficial lobe)     | 28     | 2.96459  | 2.99333           | 0.02874           | 72      | 0.13               | 0.20               |
| Kidney (L, tip)                 | 29     | 2.97033  | 3.02784           | 0.05751           | 436     | 0.40               | 0.60               |
| Lung (R, top lobe)              | 30     | 2.96859  | 2.98783           | 0.01924           | 71      | 0.19               | 0.30               |
| Trachea (near cut-off)          | 31     | 2.97382  | 2.99873           | 0.02491           | 127     | 0.27               | 0.41               |
| Esophagus (near cut-off)        | 32     | 2.94802  | 2.96536           | 0.01734           | 88      | 0.27               | 0.40               |
| Spleen (tip)                    | 33     | 2.98469  | 3.00785           | 0.02316           | 97      | 0.22               | 0.34               |
| Heart                           | 34     | 2.96468  | 3.01621           | 0.05153           | 122     | 0.12               | 0.19               |
| Urine (fill to line of tube)    | 35     | 2.95915  | 3.20350           | 0.24435           | 2966    | 0.64               | 0.97               |
| Spinal Dura                     | 36     | 2.97503  | 2.98040           | 0.00537           | 30      | 0.29               | 0.44               |
| Lower Cervical Spinal Cord      | 37     | 2.98077  | 3.11365           | 0.13288           | 175     | 0.07               | 0.11               |
| Thoracic Spinal Cord            | 38     | 3.03041  | 3.13968           | 0.10927           | 147     | 0.07               | 0.11               |
| Lumbar Spinal Cord              | 39     | 2.98257  | 3.12216           | 0.13959           | 161     | 0.06               | 0.09               |
| Blood Sample                    | 40     | 2.98591  | 3.31631           | 0.33040           | 6085    | 0.97               | 1.47               |
| Drug Standard                   | 41     | 2.98211  | 2.98530           | 0.00319           | 3241197 |                    |                    |
| Drug Standard                   | 42     | 2.97255  | 2.97532           | 0.00277           | 3145247 |                    |                    |
| Drug Standard                   | 43     | 2.97440  | 2.97701           | 0.00261           | 3180032 |                    |                    |
| Circle of Willis/Basilar Artery | 44     | x        | x                 | x                 | x       | x                  | x                  |
| Renal Artery                    | 45     | x        | x                 | x                 | x       | x                  | x                  |
| Blank                           | 46     |          |                   |                   | 0       |                    |                    |
| Blank                           | 47     |          |                   |                   | 0       |                    |                    |
|                                 |        |          |                   |                   |         | 19.005<br>cpm/fmol | 12.530<br>cpm/fmol |

| Auto Calculations                                     | Enter Values                        |
|-------------------------------------------------------|-------------------------------------|
| Total uL of Dose Sol = 60.8                           | Oxytocin Molecular Weight = 1.007   |
| Hot mg = 0.0000                                       | Date of Synthesis = 03/10/08        |
| Cold mg = 0.0052                                      | Hot uCi/uL at Synthesis = 1.000     |
| Total mg in Dose Sol = 0.0052                         | Hot uCi/ug at Synthesis = 2184.30   |
| Conc Of Dose Sol (ug/uL) = 0.0854                     | Cold ug/uL = 5.00                   |
| Days after Synthesis Delivered = 10                   | Desired uCi = 41.0                  |
| Decay on Day Delivered = 0.8909                       | Desired mg = 0.004                  |
| Total uCi in Dose Sol on Day Delivered = 53.26        | Estimated Desired nmol = 4.0        |
| uCi/uL in Dose Sol on Day Delivered = 0.8758          | <b>Date of Delivery = 03/20/08</b>  |
| mg delivered = 0.004                                  | <b>uL delivered (actual) = 46.8</b> |
| uCi delivered = 41.00                                 | <b>Date of Counting = 03/20/08</b>  |
| Estimated nmol delivered = 3.97                       | <b>Dose Calculator</b>              |
| Days after Synthesis Counted = 10                     | uL Hot to Deliver = 46.02           |
| Decay on Day Counted = 0.8909                         | uL Cold to Deliver = 0.80           |
| Specific Activity from Specs (cpm/fmol) = 19.005      | Total uL to Deliver = 46.82         |
| Avg. Volume of Standard (uL)* = 3.0                   | Hot to Cold Ratio = 57.83           |
| Avg. CPM-bkgd of Standard = 3,188,825                 | Total uL to Make = 60.82            |
| Specific Activity from Standards: (CPM/fmol) = 12.530 | Dose Solution uL Hot = 59.78        |
| Date of Disposal from Decay Storage = 10/31/09        | Dose Solution uL Cold = 1.03        |
| Average Background = 25.00                            | Efficiency of Counter = 82.92       |

\*assume 3 uL

**Table B05: 0.004 mg Intranasal Oxytocin Rat 52 Data**

| Trigemina Rat 52  | Route | Compound | Volume (uL) | uCi   | mg    | Time (min) | Perfused @ (min) |
|-------------------|-------|----------|-------------|-------|-------|------------|------------------|
| Amount Delivered: | IN    | Oxytocin | 51          | 41.00 | 0.004 | 14:02      | 31:04            |

| Tissue Description              | Tube # | Tube (g) | Tissue + Tube (g) | Tissue Weight (g) | CPM     | nM (Spec. Act.)    | nM (Stan.)         |
|---------------------------------|--------|----------|-------------------|-------------------|---------|--------------------|--------------------|
| Dorsal Dura                     | 1      | 2.97283  | 2.98861           | 0.01578           | 633     | 2.11               | 3.13               |
| Ventral Dura                    | 2      | 3.00272  | 3.01463           | 0.01191           | 730     | 3.22               | 4.78               |
| Trigeminal Ganglion             | 3      | 3.03322  | 3.05758           | 0.02436           | 567     | 1.22               | 1.82               |
| Maxillary Nerve                 | 4      | 2.99020  | 3.00473           | 0.01453           | 571     | 2.07               | 3.07               |
| Ophthalmic Nerve                | 5      | 2.99781  | 3.00184           | 0.00403           | 402     | 5.24               | 7.77               |
| Mandibular Nerve                | 6      | 2.95777  | 2.96174           | 0.00397           | 175     | 2.31               | 3.43               |
| Upper Cervical Spinal Cord      | 7      | 2.97755  | 3.03112           | 0.05357           | 177     | 0.17               | 0.26               |
| Olfactory Bulbs                 | 8      | 2.98949  | 3.05963           | 0.07014           | 570     | 0.43               | 0.63               |
| Anterior Olfactory Nucleus      | 9      | 2.99435  | 3.03649           | 0.04214           | 168     | 0.21               | 0.31               |
| Frontal Cortex                  | 10     | 2.96148  | 3.00446           | 0.04298           | 191     | 0.23               | 0.35               |
| Caudate/Putamen                 | 11     | 2.99717  | 3.00921           | 0.01204           | 41      | 0.18               | 0.27               |
| Septal Nucleus                  | 12     | 2.98456  | 2.99961           | 0.01505           | 44      | 0.15               | 0.23               |
| Parietal Cortex                 | 13     | 3.06426  | 3.10583           | 0.04157           | 158     | 0.20               | 0.30               |
| Hippocampus                     | 14     | 2.98073  | 3.02026           | 0.03953           | 115     | 0.15               | 0.23               |
| Thalamus                        | 15     | 2.99167  | 3.07197           | 0.08030           | 222     | 0.15               | 0.22               |
| Hypothalamus                    | 16     | 2.95636  | 2.98823           | 0.03187           | 91      | 0.15               | 0.22               |
| Midbrain                        | 17     | 2.96073  | 3.05450           | 0.09377           | 334     | 0.19               | 0.28               |
| Pons                            | 18     | 2.99576  | 3.07321           | 0.07745           | 257     | 0.17               | 0.26               |
| Medulla                         | 19     | 2.98761  | 3.09521           | 0.10760           | 468     | 0.23               | 0.34               |
| Cerebellum                      | 20     | 2.97384  | 3.23587           | 0.26203           | 1140    | 0.23               | 0.34               |
| Superficial Nodes (2)           | 21     | 2.97851  | 3.04561           | 0.06710           | 3901    | 3.06               | 4.53               |
| Cervical Nodes (2)              | 22     | 2.95705  | 2.96596           | 0.00891           | 132     | 0.78               | 1.16               |
| Thyroid                         | 23     | 3.00788  | 3.02905           | 0.02117           | 6519    | 16.19              | 24.01              |
| Olfactory Epithelium            | 24     | 2.99637  | 3.08368           | 0.08731           | 309940  | 186.68             | 276.84             |
| Respiratory Epithelium          | 25     | 2.98835  | 3.08741           | 0.09906           | 4444910 | 2,359.69           | 3,499.31           |
| Axillary Nodes (2)              | 26     | 2.97381  | 2.99963           | 0.02582           | 142     | 0.29               | 0.43               |
| Muscle (R, deltoid)             | 27     | 2.96837  | 2.98437           | 0.01600           | 72      | 0.24               | 0.35               |
| Liver (R, superficial lobe)     | 28     | 2.99184  | 3.02729           | 0.03545           | 101     | 0.15               | 0.22               |
| Kidney (L, tip)                 | 29     | 2.98588  | 3.01878           | 0.03290           | 137     | 0.22               | 0.32               |
| Lung (R, top lobe)              | 30     | 2.98006  | 3.00188           | 0.02182           | 156     | 0.38               | 0.56               |
| Trachea (near cut-off)          | 31     | 2.97574  | 2.99804           | 0.02230           | 299     | 0.70               | 1.05               |
| Esophagus (near cut-off)        | 32     | 2.97524  | 2.99135           | 0.01611           | 189     | 0.62               | 0.91               |
| Spleen (tip)                    | 33     | 2.96518  | 2.99342           | 0.02824           | 174     | 0.32               | 0.48               |
| Heart                           | 34     | 2.98308  | 3.01344           | 0.03036           | 112     | 0.19               | 0.29               |
| Urine (fill to line of tube)    | 35     | 2.97853  | 3.24084           | 0.26231           | 2225    | 0.45               | 0.66               |
| Spinal Dura                     | 36     | 3.05732  | 3.07314           | 0.01582           | 99      | 0.33               | 0.49               |
| Lower Cervical Spinal Cord      | 37     | 2.95901  | 3.08756           | 0.12855           | 260     | 0.11               | 0.16               |
| Thoracic Spinal Cord            | 38     | 2.97911  | 3.07116           | 0.09205           | 151     | 0.09               | 0.13               |
| Lumbar Spinal Cord              | 39     | 2.94528  | 3.07719           | 0.13191           | 242     | 0.10               | 0.14               |
| Blood Sample                    | 40     | 3.03530  | 3.35299           | 0.31769           | 10087   | 1.67               | 2.48               |
| Drug Standard                   | 41     | 2.97652  | 2.97834           | 0.00182           | 2921650 |                    |                    |
| Drug Standard                   | 42     | 2.95744  | 2.95965           | 0.00221           | 3010902 |                    |                    |
| Drug Standard                   | 43     | 2.99509  | 2.99803           | 0.00294           | 3109091 |                    |                    |
| Circle of Willis/Basilar Artery | 44     | 0.01080  | 0.01585           | 0.00505           | 70      | 0.73               | 1.09               |
| Renal Artery                    | 45     | 2.97825  | 2.98632           | 0.00807           | 37      | 0.24               | 0.36               |
| Blank                           | 46     |          |                   |                   | 0       |                    |                    |
| Blank                           | 47     |          |                   |                   | 0       |                    |                    |
|                                 |        |          |                   |                   |         | 19.016<br>cpm/fmol | 12.823<br>cpm/fmol |

| Auto Calculations                                     | Enter Values                         |
|-------------------------------------------------------|--------------------------------------|
| Total uL of Dose Sol = 64.7                           | Oxytocin Molecular Weight = 1,007    |
| Hot mg = 0.0000                                       | Date of Synthesis = 03/10/08         |
| Cold mg = 0.0051                                      | Hot uCi/uL at Synthesis = 1,000      |
| Total mg in Dose Sol = 0.0051                         | Hot uCi/ug at Synthesis = 2184.30    |
| Conc Of Dose Sol (ug/uL) = 0.0789                     | Cold ug/uL = 5.00                    |
| Days after Synthesis Delivered = 17                   | Desired uCi = 41.0                   |
| Decay on Day Delivered = 0.8217                       | Desired mg = 0.004                   |
| Total uCi in Dose Sol on Day Delivered = 52.32        | Estimated Desired nmol = 4.0         |
| uCi/uL in Dose Sol on Day Delivered = 0.8088          | <b>Date of Delivery = 03/27/08</b>   |
| mg delivered = 0.004                                  | <b>uL delivered (actual) = 50.69</b> |
| uCi delivered = 41.00                                 | <b>Date of Counting = 03/27/08</b>   |
| Estimated nmol delivered = 3.97                       | <b>Dose Calculator</b>               |
| Days after Synthesis Counted = 17                     | uL Hot to Deliver = 49.90            |
| Decay on Day Counted = 0.8217                         | uL Cold to Deliver = 0.80            |
| Specific Activity from Specs (cpm/fmol) = 19.016      | Total uL to Deliver = 50.69          |
| Avg. Volume of Standard (uL)* = 3.0                   | Hot to Cold Ratio = 62.73            |
| Avg. CPM-bkgd of Standard = 3,013,881                 | Total uL to Make = 64.69             |
| Specific Activity from Standards: (CPM/fmol) = 12.823 | Dose Solution uL Hot = 63.68         |
| Date of Disposal from Decay Storage = 10/31/09        | Dose Solution uL Cold = 1.02         |
| Average Background = 28.60                            | Efficiency of Counter = 82.97        |

\*assume 3 uL



**Table B06: 0.004 mg Intranasal Oxytocin Rat 53 Data**

| Trigemina Rat 53  | Route | Compound | Volume (uL) | uCi   | mg    | Time (min) | Perfused @ (min) |
|-------------------|-------|----------|-------------|-------|-------|------------|------------------|
| Amount Delivered: | IN    | Oxytocin | 51          | 41.00 | 0.004 | 14:05      | 30:44            |

| Tissue Description              | Tube # | Tube (g) | Tissue + Tube (g) | Tissue Weight (g) | CPM     | nM (Spec. Act.)    | nM (Stan.)         |
|---------------------------------|--------|----------|-------------------|-------------------|---------|--------------------|--------------------|
| Dorsal Dura                     | 1      | 2.99520  | 3.00861           | 0.01341           | 740     | 2.90               | 4.31               |
| Ventral Dura                    | 2      | 2.98568  | 2.99685           | 0.01117           | 724     | 3.41               | 5.05               |
| Trigeminal Ganglion             | 3      | 2.97120  | 2.99488           | 0.02368           | 319     | 0.71               | 1.05               |
| Maxillary Nerve                 | 4      | 2.98280  | 2.99744           | 0.01464           | 217     | 0.78               | 1.15               |
| Ophthalmic Nerve                | 5      | 2.98535  | 2.99022           | 0.00487           | 164     | 1.77               | 2.63               |
| Mandibular Nerve                | 6      | 2.96441  | 2.96834           | 0.00393           | 78      | 1.04               | 1.54               |
| Upper Cervical Spinal Cord      | 7      | 2.98901  | 3.01680           | 0.02779           | 238     | 0.45               | 0.67               |
| Olfactory Bulbs                 | 8      | 2.98638  | 3.08342           | 0.09704           | 668     | 0.36               | 0.54               |
| Anterior Olfactory Nucleus      | 9      | 2.98233  | 3.01776           | 0.03543           | 123     | 0.18               | 0.27               |
| Frontal Cortex                  | 10     | 2.97563  | 3.02582           | 0.05019           | 222     | 0.23               | 0.34               |
| Caudate/Putamen                 | 11     | 2.96831  | 2.97900           | 0.01069           | 30      | 0.15               | 0.22               |
| Septal Nucleus                  | 12     | 3.06952  | 3.08020           | 0.01068           | 24      | 0.12               | 0.17               |
| Parietal Cortex                 | 13     | 3.01080  | 3.05457           | 0.04377           | 126     | 0.15               | 0.23               |
| Hippocampus                     | 14     | 2.98260  | 3.02051           | 0.03791           | 88      | 0.12               | 0.18               |
| Thalamus                        | 15     | 2.98199  | 3.05458           | 0.07259           | 152     | 0.11               | 0.16               |
| Hypothalamus                    | 16     | 3.00783  | 3.03267           | 0.02484           | 62      | 0.13               | 0.19               |
| Midbrain                        | 17     | 2.99078  | 3.11354           | 0.12276           | 325     | 0.14               | 0.21               |
| Pons                            | 18     | 3.00703  | 3.07980           | 0.07277           | 234     | 0.17               | 0.25               |
| Medulla                         | 19     | 2.96792  | 3.07098           | 0.10306           | 359     | 0.18               | 0.27               |
| Cerebellum                      | 20     | 2.99564  | 3.24284           | 0.24720           | 892     | 0.19               | 0.28               |
| Superficial Nodes (2)           | 21     | 2.98763  | 3.08794           | 0.10031           | 4123    | 2.16               | 3.21               |
| Cervical Nodes (2)              | 22     | 2.96899  | 2.98281           | 0.01382           | 563     | 2.14               | 3.17               |
| Thyroid                         | 23     | 2.97979  | 3.00430           | 0.02451           | 8435    | 18.10              | 26.84              |
| Olfactory Epithelium            | 24     | 2.96876  | 3.03420           | 0.06544           | 153160  | 123.08             | 182.52             |
| Respiratory Epithelium          | 25     | 2.95822  | 3.05323           | 0.09501           | 2132327 | 1,180.25           | 1,750.26           |
| Axillary Nodes (2)              | 26     | 2.95439  | 2.98390           | 0.02951           | 228     | 0.41               | 0.60               |
| Muscle (R, deltoid)             | 27     | 2.98275  | 3.00598           | 0.02323           | 189     | 0.43               | 0.64               |
| Liver (R, superficial lobe)     | 28     | 2.98892  | 3.00125           | 0.01233           | 235     | 1.00               | 1.49               |
| Kidney (L, tip)                 | 29     | 2.98430  | 3.00272           | 0.01842           | 130     | 0.37               | 0.55               |
| Lung (R, top lobe)              | 30     | 2.98135  | 2.98928           | 0.00793           | 44      | 0.29               | 0.43               |
| Trachea (near cut-off)          | 31     | 3.00051  | 3.02224           | 0.02173           | 231     | 0.56               | 0.83               |
| Esophagus (near cut-off)        | 32     | 2.97405  | 2.99157           | 0.01752           | 177     | 0.53               | 0.79               |
| Spleen (tip)                    | 33     | 2.97665  | 2.99360           | 0.01695           | 165     | 0.51               | 0.76               |
| Heart                           | 34     | 2.96030  | 2.99504           | 0.03474           | 180     | 0.27               | 0.40               |
| Urine (fill to line of tube)    | 35     | 2.96168  | 3.21590           | 0.25422           | 3545    | 0.73               | 1.09               |
| Spinal Dura                     | 36     | 2.99808  | 3.00904           | 0.01096           | 360     | 1.73               | 2.56               |
| Lower Cervical Spinal Cord      | 37     | 3.04121  | 3.19307           | 0.15186           | 444     | 0.15               | 0.23               |
| Thoracic Spinal Cord            | 38     | 2.98327  | 3.09687           | 0.11360           | 187     | 0.09               | 0.13               |
| Lumbar Spinal Cord              | 39     | 3.05464  | 3.14626           | 0.09162           | 169     | 0.10               | 0.14               |
| Blood Sample                    | 40     | 2.98932  | 3.19607           | 0.20675           | 6260    | 1.59               | 2.36               |
| Drug Standard                   | 41     | 2.97652  | 2.97834           | 0.00182           | 2921650 |                    |                    |
| Drug Standard                   | 42     | 2.95744  | 2.95965           | 0.00221           | 3010902 |                    |                    |
| Drug Standard                   | 43     | 2.99509  | 2.99803           | 0.00294           | 3109091 |                    |                    |
| Circle of Willis/Basilar Artery | 44     | 0.01103  | 0.01561           | 0.00458           | 76      | 0.88               | 1.30               |
| Renal Artery                    | 45     | 2.96957  | 2.97294           | 0.00337           | 31      | 0.48               | 0.72               |
| Blank                           | 46     |          |                   |                   | 0       |                    |                    |
| Blank                           | 47     |          |                   |                   | 0       |                    |                    |
|                                 |        |          |                   |                   |         | 19.016<br>cpm/fmol | 12.823<br>cpm/fmol |

| Auto Calculations                                     | Enter Values                         |
|-------------------------------------------------------|--------------------------------------|
| Total uL of Dose Sol = 64.7                           | Oxytocin Molecular Weight = 1,007    |
| Hot mg = 0.0000                                       | Date of Synthesis = 03/10/08         |
| Cold mg = 0.0051                                      | Hot uCi/uL at Synthesis = 1,000      |
| Total mg in Dose Sol = 0.0051                         | Hot uCi/ug at Synthesis = 2184.30    |
| Conc Of Dose Sol (ug/uL) = 0.0789                     | Cold ug/uL = 5.00                    |
| Days after Synthesis Delivered = 17                   | Desired uCi = 41.0                   |
| Decay on Day Delivered = 0.8217                       | Desired mg = 0.004                   |
| Total uCi in Dose Sol on Day Delivered = 52.32        | Estimated Desired nmol = 4.0         |
| uCi/uL in Dose Sol on Day Delivered = 0.8088          | <b>Date of Delivery = 03/27/08</b>   |
| mg delivered = 0.004                                  | <b>uL delivered (actual) = 50.69</b> |
| uCi delivered = 41.00                                 | <b>Date of Counting = 03/27/08</b>   |
| Estimated nmol delivered = 3.97                       | <b>Dose Calculator</b>               |
| Days after Synthesis Counted = 17                     | uL Hot to Deliver = 49.90            |
| Decay on Day Counted = 0.8217                         | uL Cold to Deliver = 0.80            |
| Specific Activity from Specs (cpm/fmol) = 19.016      | Total uL to Deliver = 50.69          |
| Avg. Volume of Standard (uL)* = 3.0                   | Hot to Cold Ratio = 62.73            |
| Avg. CPM-bkgd of Standard = 3,013,881                 | Total uL to Make = 64.69             |
| Specific Activity from Standards: (CPM/fmol) = 12.823 | Dose Solution uL Hot = 63.68         |
| Date of Disposal from Decay Storage = 10/31/09        | Dose Solution uL Cold = 1.02         |
| Average Background = 26.24                            | Efficiency of Counter = 82.97        |

\*assume 3 uL

**Table B07: 0.004 mg Intranasal Oxytocin Rat 56 Data**

| Trigemina Rat 56  | Route | Compound | Volume (uL) | uCi   | mg    | Time (min) | Perfused @ (min) |
|-------------------|-------|----------|-------------|-------|-------|------------|------------------|
| Amount Delivered: | IN    | Oxytocin | 54          | 41.00 | 0.004 | 14:01      | 30:46            |

| Tissue Description              | Tube # | Tube (g) | Tissue + Tube (g) | Tissue Weight (g) | CPM     | nM (Spec. Act.)    | nM (Stan.)         |
|---------------------------------|--------|----------|-------------------|-------------------|---------|--------------------|--------------------|
| Dorsal Dura                     | 1      | 2.98175  | 2.99366           | 0.01191           | 668     | 2.95               | 4.40               |
| Ventral Dura                    | 2      | 2.96257  | 2.97124           | 0.00867           | 712     | 4.32               | 6.44               |
| Trigeminal Ganglion             | 3      | 2.97989  | 3.00374           | 0.02385           | 299     | 0.66               | 0.98               |
| Maxillary Nerve                 | 4      | 3.00356  | 3.01500           | 0.01144           | 215     | 0.99               | 1.47               |
| Ophthalmic Nerve                | 5      | 2.97995  | 2.98262           | 0.00267           | 71      | 1.39               | 2.08               |
| Mandibular Nerve                | 6      | 2.96805  | 2.97178           | 0.00373           | 187     | 2.64               | 3.94               |
| Upper Cervical Spinal Cord      | 7      | 2.96551  | 3.03448           | 0.06897           | 327     | 0.25               | 0.37               |
| Olfactory Bulbs                 | 8      | 2.98216  | 3.05573           | 0.07357           | 767     | 0.55               | 0.82               |
| Anterior Olfactory Nucleus      | 9      | 2.96982  | 3.00589           | 0.03607           | 210     | 0.31               | 0.46               |
| Frontal Cortex                  | 10     | 2.97500  | 3.03004           | 0.05504           | 377     | 0.36               | 0.54               |
| Caudate/Putamen                 | 11     | 3.00038  | 3.01146           | 0.01108           | 55      | 0.26               | 0.39               |
| Septal Nucleus                  | 12     | 2.97171  | 2.98548           | 0.01377           | 38      | 0.15               | 0.22               |
| Parietal Cortex                 | 13     | 3.00161  | 3.04272           | 0.04111           | 195     | 0.25               | 0.37               |
| Hippocampus                     | 14     | 3.00119  | 3.04032           | 0.03913           | 104     | 0.14               | 0.21               |
| Thalamus                        | 15     | 2.98581  | 3.05492           | 0.06911           | 162     | 0.12               | 0.18               |
| Hypothalamus                    | 16     | 3.01928  | 3.05436           | 0.03508           | 95      | 0.14               | 0.21               |
| Midbrain                        | 17     | 3.00320  | 3.11236           | 0.10916           | 353     | 0.17               | 0.25               |
| Pons                            | 18     | 2.96699  | 3.04605           | 0.07906           | 203     | 0.13               | 0.20               |
| Medulla                         | 19     | 3.00131  | 3.11695           | 0.11564           | 336     | 0.15               | 0.23               |
| Cerebellum                      | 20     | 2.96470  | 3.23093           | 0.26623           | 840     | 0.17               | 0.25               |
| Superficial Nodes (2)           | 21     | 2.97586  | 3.04227           | 0.06641           | 1066    | 0.84               | 1.26               |
| Cervical Nodes (2)              | 22     | 2.96574  | 2.98406           | 0.01832           | 1309    | 3.75               | 5.60               |
| Thyroid                         | 23     | 2.96602  | 2.98443           | 0.01841           | 8364    | 23.87              | 35.63              |
| Olfactory Epithelium            | 24     | 2.95628  | 3.03319           | 0.07691           | 11713   | 8.00               | 11.95              |
| Respiratory Epithelium          | 25     | 2.97604  | 3.05274           | 0.07670           | 3157624 | 2,163.52           | 3,229.23           |
| Axillary Nodes (2)              | 26     | 2.95346  | 2.97177           | 0.01831           | 185     | 0.53               | 0.79               |
| Muscle (R, deltoid)             | 27     | 2.96282  | 2.97316           | 0.01034           | 58      | 0.29               | 0.44               |
| Liver (R, superficial lobe)     | 28     | 2.96537  | 2.99635           | 0.03098           | 174     | 0.30               | 0.44               |
| Kidney (L, tip)                 | 29     | 2.94323  | 2.97210           | 0.02887           | 235     | 0.43               | 0.64               |
| Lung (R, top lobe)              | 30     | 2.95329  | 2.96918           | 0.01589           | 130     | 0.43               | 0.64               |
| Trachea (near cut-off)          | 31     | 3.00549  | 3.02524           | 0.01975           | 179     | 0.47               | 0.71               |
| Esophagus (near cut-off)        | 32     | 2.99560  | 3.01235           | 0.01675           | 156     | 0.49               | 0.73               |
| Spleen (tip)                    | 33     | 2.94670  | 2.98046           | 0.03376           | 343     | 0.53               | 0.80               |
| Heart                           | 34     | 2.96332  | 2.99214           | 0.02882           | 92      | 0.17               | 0.25               |
| Urine (fill to line of tube)    | 35     | 2.97299  | 3.00261           | 0.02962           | 1003    | 1.78               | 2.66               |
| Spinal Dura                     | 36     | 2.95670  | 2.96821           | 0.01151           | 82      | 0.37               | 0.56               |
| Lower Cervical Spinal Cord      | 37     | 2.93994  | 3.04969           | 0.10975           | 189     | 0.09               | 0.14               |
| Thoracic Spinal Cord            | 38     | 2.96630  | 3.06451           | 0.09821           | 127     | 0.07               | 0.10               |
| Lumbar Spinal Cord              | 39     | 3.01254  | 3.14495           | 0.13241           | 211     | 0.08               | 0.12               |
| Blood Sample                    | 40     | 3.02033  | 3.28992           | 0.26959           | 9113    | 1.78               | 2.65               |
| Drug Standard                   | 41     | 2.95428  | 2.95714           | 0.00286           | 2849408 |                    |                    |
| Drug Standard                   | 42     | 2.95382  | 2.95678           | 0.00296           | 2834480 |                    |                    |
| Drug Standard                   | 43     | 2.95761  | 2.96103           | 0.00342           | 2810189 |                    |                    |
| Circle of Willis/Basilar Artery | 44     | 0.01171  | 0.01574           | 0.00403           | 118     | 1.54               | 2.29               |
| Renal Artery                    | 45     | 2.95370  | 2.95998           | 0.00628           | 50      | 0.42               | 0.62               |
| Blank                           | 46     |          |                   |                   | 3       |                    |                    |
| Blank                           | 47     |          |                   |                   | 1       |                    |                    |
|                                 |        |          |                   |                   |         | 19.028<br>cpm/fmol | 12.749<br>cpm/fmol |

| Auto Calculations                                     | Enter Values                      |
|-------------------------------------------------------|-----------------------------------|
| Total uL of Dose Sol = 67.7                           | Oxytocin Molecular Weight = 1,007 |
| Hot mg = 0.0000                                       | Date of Synthesis = 03/10/08      |
| Cold mg = 0.0050                                      | Hot uCi/uL at Synthesis = 1,000   |
| Total mg in Dose Sol = 0.0050                         | Hot uCi/ug at Synthesis = 2184.30 |
| Conc Of Dose Sol (ug/uL) = 0.0745                     | Cold ug/uL = 5.00                 |
| Days after Synthesis Delivered = 22                   | Desired uCi = 41.0                |
| Decay on Day Delivered = 0.7756                       | Desired mg = 0.004                |
| Total uCi in Dose Sol on Day Delivered = 51.70        | Estimated Desired nmol = 4.0      |
| uCi/uL in Dose Sol on Day Delivered = 0.7641          | Date of Delivery = 04/01/08       |
| mg delivered = 0.004                                  | uL delivered (actual) = 53.7      |
| uCi delivered = 41.00                                 | Date of Counting = 04/01/08       |
| Estimated nmol delivered = 3.97                       | <b>Dose Calculator</b>            |
| Days after Synthesis Counted = 22                     | uL Hot to Deliver = 52.86         |
| Decay on Day Counted = 0.7756                         | uL Cold to Deliver = 0.80         |
| Specific Activity from Specs (cpm/fmol) = 19.028      | Total uL to Deliver = 53.66       |
| Avg. Volume of Standard (uL)* = 3.0                   | Hot to Cold Ratio = 66.48         |
| Avg. CPM-bkgd of Standard = 2,831,359                 | Total uL to Make = 67.66          |
| Specific Activity from Standards: (CPM/fmol) = 12.749 | Dose Solution uL Hot = 66.65      |
| Date of Disposal from Decay Storage = 10/31/09        | Dose Solution uL Cold = 1.00      |
| Average Background= 29.28                             | Efficiency of Counter= 83.04      |

\*assume 3 uL

**Table B08: 0.004 mg Intranasal Oxytocin Rat 57 Data**

| Trigemina Rat 57  | Route | Compound | Volume (uL) | uCi   | mg    | Time (min) | Perfused @ (min) |
|-------------------|-------|----------|-------------|-------|-------|------------|------------------|
| Amount Delivered: | IN    | Oxytocin | 54          | 41.00 | 0.004 | 13:59      | 31:01            |

| Tissue Description              | Tube # | Tube (g) | Tissue + Tube (g) | Tissue Weight (g) | CPM     | nM (Spec. Act.) | nM (Stan.) |
|---------------------------------|--------|----------|-------------------|-------------------|---------|-----------------|------------|
| Dorsal Dura                     | 1      | 3.00218  | 3.01633           | 0.01415           | 1134    | 4.21            | 6.34       |
| Ventral Dura                    | 2      | 2.98415  | 2.99490           | 0.01075           | 297     | 1.45            | 2.19       |
| Trigeminal Ganglion             | 3      | 2.99506  | 3.02138           | 0.02632           | 233     | 0.47            | 0.70       |
| Maxillary Nerve                 | 4      | 2.98597  | 3.00091           | 0.01494           | 268     | 0.94            | 1.42       |
| Ophthalmic Nerve                | 5      | 2.96332  | 2.96751           | 0.00419           | 607     | 7.61            | 11.45      |
| Mandibular Nerve                | 6      | 2.97128  | 2.97529           | 0.00401           | 108     | 1.41            | 2.13       |
| Upper Cervical Spinal Cord      | 7      | 2.97611  | 3.01320           | 0.03709           | 257     | 0.36            | 0.55       |
| Olfactory Bulbs                 | 8      | 2.98553  | 3.04546           | 0.05993           | 623     | 0.55            | 0.82       |
| Anterior Olfactory Nucleus      | 9      | 2.98936  | 3.02002           | 0.03066           | 130     | 0.22            | 0.33       |
| Frontal Cortex                  | 10     | 3.00227  | 3.03779           | 0.03552           | 152     | 0.23            | 0.34       |
| Caudate/Putamen                 | 11     | 2.98048  | 2.99279           | 0.01231           | 41      | 0.17            | 0.26       |
| Septal Nucleus                  | 12     | 2.98411  | 2.99857           | 0.01446           | 36      | 0.13            | 0.20       |
| Parietal Cortex                 | 13     | 2.96289  | 3.00236           | 0.03947           | 230     | 0.31            | 0.46       |
| Hippocampus                     | 14     | 3.02996  | 3.06074           | 0.03078           | 89      | 0.15            | 0.23       |
| Thalamus                        | 15     | 2.97257  | 3.02928           | 0.05671           | 147     | 0.14            | 0.21       |
| Hypothalamus                    | 16     | 2.97274  | 2.99768           | 0.02494           | 71      | 0.15            | 0.23       |
| Midbrain                        | 17     | 2.97839  | 3.11388           | 0.13549           | 347     | 0.13            | 0.20       |
| Pons                            | 18     | 3.01404  | 3.07943           | 0.06539           | 262     | 0.21            | 0.32       |
| Medulla                         | 19     | 2.97675  | 3.08118           | 0.10443           | 330     | 0.17            | 0.25       |
| Cerebellum                      | 20     | 2.96726  | 3.22870           | 0.26144           | 807     | 0.16            | 0.24       |
| Superficial Nodes (2)           | 21     | 2.98894  | 3.06348           | 0.07454           | 4300    | 3.03            | 4.56       |
| Cervical Nodes (2)              | 22     | 2.96702  | 2.97547           | 0.00845           | 97      | 0.61            | 0.91       |
| Thyroid                         | 23     | 2.96541  | 2.99074           | 0.02533           | 12921   | 26.81           | 40.36      |
| Olfactory Epithelium            | 24     | 3.02241  | 3.11150           | 0.08909           | 12121   | 7.15            | 10.76      |
| Respiratory Epithelium          | 25     | 2.96131  | 3.04921           | 0.08790           | 6925466 | 4,140.53        | 6,233.58   |
| Axillary Nodes (2)              | 26     | 2.95589  | 2.97826           | 0.02237           | 163     | 0.38            | 0.58       |
| Muscle (R, deltoid)             | 27     | 2.99322  | 3.01448           | 0.02126           | 77      | 0.19            | 0.29       |
| Liver (R, superficial lobe)     | 28     | 2.95839  | 2.99098           | 0.03259           | 139     | 0.22            | 0.34       |
| Kidney (L, tip)                 | 29     | 2.99264  | 3.01664           | 0.02400           | 233     | 0.51            | 0.77       |
| Lung (R, top lobe)              | 30     | 2.94835  | 2.96854           | 0.02019           | 314     | 0.82            | 1.23       |
| Trachea (near cut-off)          | 31     | 2.95961  | 2.97613           | 0.01652           | 176     | 0.56            | 0.84       |
| Esophagus (near cut-off)        | 32     | 2.99048  | 3.00186           | 0.01138           | 91      | 0.42            | 0.63       |
| Spleen (tip)                    | 33     | 2.97647  | 2.99890           | 0.02243           | 253     | 0.59            | 0.89       |
| Heart                           | 34     | 2.96029  | 2.99370           | 0.03341           | 113     | 0.18            | 0.27       |
| Urine (fill to line of tube)    | 35     | 2.94686  | 3.18522           | 0.23836           | 5817    | 1.28            | 1.93       |
| Spinal Dura                     | 36     | 2.96649  | 2.98074           | 0.01425           | 125     | 0.46            | 0.70       |
| Lower Cervical Spinal Cord      | 37     | 2.99054  | 3.13461           | 0.14407           | 308     | 0.11            | 0.17       |
| Thoracic Spinal Cord            | 38     | 2.95716  | 3.05892           | 0.10176           | 162     | 0.08            | 0.13       |
| Lumbar Spinal Cord              | 39     | 2.97439  | 3.10729           | 0.13290           | 249     | 0.10            | 0.15       |
| Blood Sample                    | 40     | 2.95056  | 3.23941           | 0.28885           | 12100   | 2.20            | 3.31       |
| Drug Standard                   | 41     | 2.95428  | 2.95714           | 0.00286           | 2806898 |                 |            |
| Drug Standard                   | 42     | 2.95382  | 2.95678           | 0.00296           | 2821020 |                 |            |
| Drug Standard                   | 43     | 2.95761  | 2.96103           | 0.00342           | 2793265 |                 |            |
| Circle of Willis/Basilar Artery | 44     | 0.01097  | 0.01614           | 0.00517           | 43      | 0.44            | 0.65       |
| Renal Artery                    | 45     | 2.96847  | 2.97417           | 0.00570           | 57      | 0.53            | 0.79       |
| Blank                           | 46     |          |                   |                   | 4       |                 |            |
| Blank                           | 47     |          |                   |                   | 0       |                 |            |
|                                 |        |          |                   |                   |         | 19.028          | 12.639     |
|                                 |        |          |                   |                   |         | cpm/fmol        | cpm/fmol   |

| Auto Calculations                                     | Enter Values                        |
|-------------------------------------------------------|-------------------------------------|
| Total uL of Dose Sol = 67.7                           | Oxytocin Molecular Weight = 1.007   |
| Hot mg = 0.0000                                       | Date of Synthesis = 03/10/08        |
| Cold mg = 0.0050                                      | Hot uCi/uL at Synthesis = 1.000     |
| Total mg in Dose Sol = 0.0050                         | Hot uCi/ug at Synthesis = 2184.30   |
| Conc Of Dose Sol (ug/uL) = 0.0745                     | Cold ug/uL = 5.00                   |
| Days after Synthesis Delivered = 22                   | Desired uCi = 41.0                  |
| Decay on Day Delivered = 0.7756                       | Desired mg = 0.004                  |
| Total uCi in Dose Sol on Day Delivered = 51.70        | Estimated Desired nmol = 4.0        |
| uCi/uL in Dose Sol on Day Delivered = 0.7641          | <b>Date of Delivery = 04/01/08</b>  |
| mg delivered = 0.004                                  | <b>uL delivered (actual) = 53.7</b> |
| uCi delivered = 41.00                                 | <b>Date of Counting = 04/01/08</b>  |
| Estimated nmol delivered = 3.97                       | <b>Dose Calculator</b>              |
| Days after Synthesis Counted = 22                     | uL Hot to Deliver = 52.86           |
| Decay on Day Counted = 0.7756                         | uL Cold to Deliver = 0.80           |
| Specific Activity from Specs (cpm/fmol) = 19.028      | Total uL to Deliver = 53.66         |
| Avg. Volume of Standard (uL)* = 3.0                   | Hot to Cold Ratio = 66.48           |
| Avg. CPM-bkgd of Standard = 2,807,061                 | Total uL to Make = 67.66            |
| Specific Activity from Standards: (CPM/fmol) = 12.639 | Dose Solution uL Hot = 66.65        |
| Date of Disposal from Decay Storage = 10/31/09        | Dose Solution uL Cold = 1.00        |
| Average Background = 27.68                            | Efficiency of Counter = 83.04       |

\*assume 3 uL

**Table B09: 0.004 mg Intranasal Oxytocin Rat 60 Data**

| Trigemina Rat 60  | Route | Compound | Volume (uL) | uCi   | mg    | Time (min) | Perfused @ (min) |
|-------------------|-------|----------|-------------|-------|-------|------------|------------------|
| Amount Delivered: | IN    | Oxytocin | 55          | 41.00 | 0.004 | 14:00      | 30:37            |

| Tissue Description              | Tube # | Tube (g) | Tissue + Tube (g) | Tissue Weight (g) | CPM     | nM (Spec. Act.)    | nM (Stan.)         |
|---------------------------------|--------|----------|-------------------|-------------------|---------|--------------------|--------------------|
| Dorsal Dura                     | 1      | 2.99228  | 3.00653           | 0.01425           | 328     | 1.21               | 1.83               |
| Ventral Dura                    | 2      | 2.98288  | 2.98817           | 0.00529           | 147     | 1.46               | 2.22               |
| Trigeminal Ganglion             | 3      | 2.95639  | 2.98442           | 0.02803           | 231     | 0.43               | 0.65               |
| Maxillary Nerve                 | 4      | 2.97070  | 2.98327           | 0.01257           | 177     | 0.74               | 1.12               |
| Ophthalmic Nerve                | 5      | 2.98086  | 2.98417           | 0.00331           | 87      | 1.37               | 2.08               |
| Mandibular Nerve                | 6      | 2.97240  | 2.97689           | 0.00449           | 119     | 1.39               | 2.10               |
| Upper Cervical Spinal Cord      | 7      | 2.98554  | 3.01161           | 0.02607           | 100     | 0.20               | 0.30               |
| Olfactory Bulbs                 | 8      | 2.95058  | 3.02713           | 0.07655           | 688     | 0.47               | 0.71               |
| Anterior Olfactory Nucleus      | 9      | 2.96318  | 2.99609           | 0.03291           | 136     | 0.22               | 0.33               |
| Frontal Cortex                  | 10     | 2.98206  | 3.02503           | 0.04297           | 147     | 0.18               | 0.27               |
| Caudate/Putamen                 | 11     | 3.00266  | 3.01481           | 0.01215           | 40      | 0.17               | 0.26               |
| Septal Nucleus                  | 12     | 2.96613  | 2.98740           | 0.02127           | 67      | 0.17               | 0.25               |
| Parietal Cortex                 | 13     | 2.98552  | 3.03780           | 0.05228           | 161     | 0.16               | 0.25               |
| Hippocampus                     | 14     | 3.00733  | 3.05059           | 0.04326           | 108     | 0.13               | 0.20               |
| Thalamus                        | 15     | 3.00739  | 3.09175           | 0.08436           | 235     | 0.15               | 0.22               |
| Hypothalamus                    | 16     | 2.96678  | 2.99114           | 0.02436           | 87      | 0.19               | 0.28               |
| Midbrain                        | 17     | 2.97622  | 3.06450           | 0.08828           | 272     | 0.16               | 0.25               |
| Pons                            | 18     | 3.01867  | 3.08787           | 0.06920           | 261     | 0.20               | 0.30               |
| Medulla                         | 19     | 2.98351  | 3.09023           | 0.10672           | 485     | 0.24               | 0.36               |
| Cerebellum                      | 20     | 2.96179  | 3.22100           | 0.25921           | 1089    | 0.22               | 0.33               |
| Superficial Nodes (2)           | 21     | 2.99719  | 3.06397           | 0.06678           | 1867    | 1.47               | 2.22               |
| Cervical Nodes (2)              | 22     | 2.97185  | 2.98755           | 0.01570           | 352     | 1.18               | 1.78               |
| Thyroid                         | 23     | 2.96182  | 2.98774           | 0.02592           | 16772   | 34.00              | 51.47              |
| Olfactory Epithelium            | 24     | 2.98513  | 3.08862           | 0.10349           | 627437  | 318.62             | 482.29             |
| Respiratory Epithelium          | 25     | 2.97211  | 3.07359           | 0.10148           | 2726655 | 1,412.04           | 2,137.42           |
| Axillary Nodes (2)              | 26     | 2.96872  | 2.99273           | 0.02401           | 295     | 0.65               | 0.98               |
| Muscle (R, deltoid)             | 27     | 3.01127  | 3.03483           | 0.02356           | 220     | 0.49               | 0.74               |
| Liver (R, superficial lobe)     | 28     | 3.00891  | 3.03126           | 0.02235           | 389     | 0.92               | 1.39               |
| Kidney (L, tip)                 | 29     | 2.97651  | 3.02224           | 0.04573           | 390     | 0.45               | 0.68               |
| Lung (R, top lobe)              | 30     | 2.96729  | 2.98593           | 0.01864           | 185     | 0.52               | 0.79               |
| Trachea (near cut-off)          | 31     | 2.97421  | 3.00407           | 0.02986           | 376     | 0.66               | 1.00               |
| Esophagus (near cut-off)        | 32     | 2.99169  | 3.02011           | 0.02842           | 467     | 0.86               | 1.31               |
| Spleen (tip)                    | 33     | 2.96353  | 2.98240           | 0.01887           | 387     | 1.08               | 1.63               |
| Heart                           | 34     | 3.00958  | 3.03817           | 0.02859           | 366     | 0.67               | 1.02               |
| Urine (fill to line of tube)    | 35     | 2.96717  | 3.27614           | 0.30897           | 5461    | 0.93               | 1.41               |
| Spinal Dura                     | 36     | 2.95176  | 2.95887           | 0.00711           | 231     | 1.71               | 2.58               |
| Lower Cervical Spinal Cord      | 37     | 2.94723  | 3.09459           | 0.14736           | 422     | 0.15               | 0.23               |
| Thoracic Spinal Cord            | 38     | 2.95688  | 3.06722           | 0.11034           | 223     | 0.11               | 0.16               |
| Lumbar Spinal Cord              | 39     | 2.95150  | 3.05799           | 0.10649           | 233     | 0.12               | 0.17               |
| Blood Sample                    | 40     | 2.96696  | 3.23308           | 0.26612           | 11935   | 2.36               | 3.57               |
| Drug Standard                   | 41     | 2.96241  | 2.96517           | 0.00276           | 2718457 |                    |                    |
| Drug Standard                   | 42     | 2.94818  | 2.95065           | 0.00247           | 2726004 |                    |                    |
| Drug Standard                   | 43     | 2.98948  | 2.99265           | 0.00317           | 2742571 |                    |                    |
| Circle of Willis/Basilar Artery | 44     | 2.95241  | 2.95877           | 0.00636           | 101     | 0.83               | 1.26               |
| Renal Artery                    | 45     | 2.96999  | 2.97717           | 0.00718           | 248     | 1.82               | 2.75               |
| Blank                           | 46     |          |                   |                   | 0       |                    |                    |
| Blank                           | 47     |          |                   |                   | 0       |                    |                    |
|                                 |        |          |                   |                   |         | 19.028<br>cpm/fmol | 12.571<br>cpm/fmol |

| Auto Calculations                                     | Enter Values                        |
|-------------------------------------------------------|-------------------------------------|
| Total uL of Dose Sol = 68.9                           | Oxytocin Molecular Weight = 1,007   |
| Hot mg = 0.0000                                       | Date of Synthesis = 03/10/08        |
| Cold mg = 0.0050                                      | Hot uCi/uL at Synthesis = 1,000     |
| Total mg in Dose Sol = 0.0050                         | Hot uCi/ug at Synthesis = 2184.30   |
| Conc Of Dose Sol (ug/uL) = 0.0729                     | Cold ug/uL = 5.00                   |
| Days after Synthesis Delivered = 24                   | Desired uCi = 41.0                  |
| Decay on Day Delivered = 0.7579                       | Desired mg = 0.004                  |
| Total uCi in Dose Sol on Day Delivered = 51.46        | Estimated Desired nmol = 4.0        |
| uCi/uL in Dose Sol on Day Delivered = 0.7469          | <b>Date of Delivery = 04/03/08</b>  |
| mg delivered = 0.004                                  | <b>uL delivered (actual) = 54.9</b> |
| uCi delivered = 41.00                                 | <b>Date of Counting = 04/03/08</b>  |
| Estimated nmol delivered = 3.97                       | <b>Dose Calculator</b>              |
| Days after Synthesis Counted = 24                     | uL Hot to Deliver = 54.10           |
| Decay on Day Counted = 0.7579                         | uL Cold to Deliver = 0.80           |
| Specific Activity from Specs (cpm/fmol) = 19.028      | Total uL to Deliver = 54.89         |
| Avg. Volume of Standard (uL)* = 3.0                   | Hot to Cold Ratio = 68.04           |
| Avg. CPM-bkgd of Standard = 2,729,011                 | Total uL to Make = 68.89            |
| Specific Activity from Standards: (CPM/fmol) = 12.571 | Dose Solution uL Hot = 67.89        |
| Date of Disposal from Decay Storage = 10/31/09        | Dose Solution uL Cold = 1.00        |
| Average Background = 27.50                            | Efficiency of Counter = 83.04       |

\*assume 3 uL

**Table B10: 0.004 mg Intranasal Oxytocin Rat 61 Data**

| Trigemina Rat 61  | Route | Com-pound | Volume (uL) | uCi   | mg    | Time (min) | Perfused @ (min) |
|-------------------|-------|-----------|-------------|-------|-------|------------|------------------|
| Amount Delivered: | IN    | Oxytocin  | 55          | 41.00 | 0.004 | 14:00      | 30:30            |

  

| Tissue Description              | Tube # | Tube (g) | Tissue + Tube (g) | Tissue Weight (g) | CPM     | nM (Spec. Act.)    | nM (Stan.)         |
|---------------------------------|--------|----------|-------------------|-------------------|---------|--------------------|--------------------|
| Dorsal Dura                     | 1      | 2.96168  | 2.97305           | 0.01137           | 258     | 1.19               | 1.81               |
| Ventral Dura                    | 2      | 2.96514  | 2.97217           | 0.00703           | 215     | 1.61               | 2.44               |
| Trigeminal Ganglion             | 3      | 2.97727  | 3.00629           | 0.02902           | 226     | 0.41               | 0.62               |
| Maxillary Nerve                 | 4      | 2.98685  | 2.99894           | 0.01209           | 150     | 0.65               | 0.99               |
| Ophthalmic Nerve                | 5      | 2.95942  | 2.96194           | 0.00252           | 64      | 1.34               | 2.04               |
| Mandibular Nerve                | 6      | 2.96601  | 2.96935           | 0.00334           | 169     | 2.66               | 4.04               |
| Upper Cervical Spinal Cord      | 7      | 2.98783  | 3.03119           | 0.04336           | 148     | 0.18               | 0.27               |
| Olfactory Bulbs                 | 8      | 2.96814  | 3.04200           | 0.07386           | 1282    | 0.91               | 1.39               |
| Anterior Olfactory Nucleus      | 9      | 2.97162  | 3.01233           | 0.04071           | 14512   | 18.73              | 28.46              |
| Frontal Cortex                  | 10     | 2.98220  | 3.01419           | 0.03199           | 152     | 0.25               | 0.38               |
| Caudate/Putamen                 | 11     | 2.96207  | 2.97381           | 0.01174           | 56      | 0.25               | 0.38               |
| Septal Nucleus                  | 12     | 2.96519  | 2.97795           | 0.01276           | 26      | 0.11               | 0.17               |
| Parietal Cortex                 | 13     | 2.97176  | 3.01433           | 0.04257           | 163     | 0.20               | 0.31               |
| Hippocampus                     | 14     | 2.95749  | 2.99750           | 0.04001           | 96      | 0.13               | 0.19               |
| Thalamus                        | 15     | 2.96097  | 3.02665           | 0.06568           | 161     | 0.13               | 0.20               |
| Hypothalamus                    | 16     | 2.96429  | 2.99945           | 0.03516           | 97      | 0.14               | 0.22               |
| Midbrain                        | 17     | 2.96535  | 3.08404           | 0.11869           | 325     | 0.14               | 0.22               |
| Pons                            | 18     | 2.97668  | 3.05645           | 0.07877           | 221     | 0.15               | 0.22               |
| Medulla                         | 19     | 2.96570  | 3.07702           | 0.11132           | 351     | 0.17               | 0.25               |
| Cerebellum                      | 20     | 2.97350  | 3.22093           | 0.24743           | 757     | 0.16               | 0.24               |
| Superficial Nodes (2)           | 21     | 3.01837  | 3.09608           | 0.07771           | 1275    | 0.86               | 1.31               |
| Cervical Nodes (2)              | 22     | 3.01413  | 3.02420           | 0.01007           | 407     | 2.13               | 3.23               |
| Thyroid                         | 23     | 2.97066  | 2.98558           | 0.01492           | 10063   | 35.44              | 53.85              |
| Olfactory Epithelium            | 24     | 2.97519  | 3.04879           | 0.07360           | 7568    | 5.40               | 8.21               |
| Respiratory Epithelium          | 25     | 2.99212  | 3.08998           | 0.09786           | 3551626 | 1,907.30           | 2,897.85           |
| Axillary Nodes (2)              | 26     | 2.95951  | 2.98527           | 0.02576           | 246     | 0.50               | 0.76               |
| Muscle (R, deltoid)             | 27     | 2.96367  | 2.99353           | 0.02986           | 146     | 0.26               | 0.39               |
| Liver (R, superficial lobe)     | 28     | 2.95718  | 3.00987           | 0.05269           | 378     | 0.38               | 0.57               |
| Kidney (L, tip)                 | 29     | 2.95989  | 2.98479           | 0.02490           | 178     | 0.37               | 0.57               |
| Lung (R, top lobe)              | 30     | 2.96151  | 2.97661           | 0.01510           | 182     | 0.63               | 0.96               |
| Trachea (near cut-off)          | 31     | 2.99886  | 3.02261           | 0.02375           | 592     | 1.31               | 1.99               |
| Esophagus (near cut-off)        | 32     | 2.98411  | 3.00882           | 0.02471           | 515     | 1.10               | 1.67               |
| Spleen (tip)                    | 33     | 2.99574  | 3.02264           | 0.02690           | 215     | 0.42               | 0.64               |
| Heart                           | 34     | 2.94832  | 2.98259           | 0.03427           | 125     | 0.19               | 0.29               |
| Urine (fill to line of tube)    | 35     | 2.97249  | 3.21791           | 0.24542           | 3080    | 0.66               | 1.00               |
| Spinal Dura                     | 36     | 2.95492  | 2.96529           | 0.01037           | 98      | 0.50               | 0.76               |
| Lower Cervical Spinal Cord      | 37     | 2.99284  | 3.13240           | 0.13956           | 274     | 0.10               | 0.16               |
| Thoracic Spinal Cord            | 38     | 2.94762  | 3.06624           | 0.11862           | 176     | 0.08               | 0.12               |
| Lumbar Spinal Cord              | 39     | 2.96390  | 3.06462           | 0.10072           | 197     | 0.10               | 0.16               |
| Blood Sample                    | 40     | 2.96763  | 3.23207           | 0.26444           | 10908   | 2.17               | 3.29               |
| Drug Standard                   | 41     | 2.96241  | 2.96517           | 0.00276           | 2709448 |                    |                    |
| Drug Standard                   | 42     | 2.94818  | 2.95065           | 0.00247           | 2715717 |                    |                    |
| Drug Standard                   | 43     | 2.98948  | 2.99265           | 0.00317           | 2731494 |                    |                    |
| Circle of Willis/Basilar Artery | 44     | 2.99924  | 3.00230           | 0.00306           | 33      | 0.57               | 0.86               |
| Renal Artery                    | 45     | 2.96734  | 2.97405           | 0.00671           | 43      | 0.34               | 0.51               |
| Blank                           | 46     |          |                   |                   | 6       |                    |                    |
| Blank                           | 47     |          |                   |                   | 1       |                    |                    |
|                                 |        |          |                   |                   |         | 19.028<br>cpm/fmol | 12.524<br>cpm/fmol |

| Auto Calculations                                     | Enter Values                        |
|-------------------------------------------------------|-------------------------------------|
| Total uL of Dose Sol = 68.9                           | Oxytocin Molecular Weight = 1.007   |
| Hot mg = 0.0000                                       | Date of Synthesis = 03/10/08        |
| Cold mg = 0.0050                                      | Hot uCi/uL at Synthesis = 1.000     |
| Total mg in Dose Sol = 0.0050                         | Hot uCi/ug at Synthesis = 2184.30   |
| Conc Of Dose Sol (ug/uL) = 0.0729                     | Cold ug/uL = 5.00                   |
| Days after Synthesis Delivered = 24                   | Desired uCi = 41.0                  |
| Decay on Day Delivered = 0.7579                       | Desired mg = 0.004                  |
| Total uCi in Dose Sol on Day Delivered = 51.46        | Estimated Desired nmol = 4.0        |
| uCi/uL in Dose Sol on Day Delivered = 0.7469          | <b>Date of Delivery = 04/03/08</b>  |
| mg delivered = 0.004                                  | <b>uL delivered (actual) = 54.9</b> |
| uCi delivered = 41.00                                 | <b>Date of Counting = 04/03/08</b>  |
| Estimated nmol delivered = 3.97                       | <b>Dose Calculator</b>              |
| Days after Synthesis Counted = 24                     | uL Hot to Deliver = 54.10           |
| Decay on Day Counted = 0.7579                         | uL Cold to Deliver = 0.80           |
| Specific Activity from Specs (cpm/fmol) = 19.028      | Total uL to Deliver = 54.89         |
| Avg. Volume of Standard (uL)* = 3.0                   | Hot to Cold Ratio = 68.04           |
| Avg. CPM-bkgd of Standard = 2,718,887                 | Total uL to Make = 68.89            |
| Specific Activity from Standards: (CPM/fmol) = 12.524 | Dose Solution uL Hot = 67.89        |
| Date of Disposal from Decay Storage = 10/31/09        | Dose Solution uL Cold = 1.00        |
| Average Background = 29.30                            | Efficiency of Counter = 83.04       |

\*assume 3 uL

## **Appendix C – Coronal Rat Brain Slices**

### **Figures**

- Figure C01: Brain Slice 01
- Figure C02: Brain Slice 02
- Figure C03: Brain Slice 03
- Figure C04: Brain Slice 04
- Figure C05: Brain Slice 05
- Figure C06: Brain Slice 06
- Figure C07: Lateral Brain Bisection

# Figure C01: 1<sup>st</sup> Slice

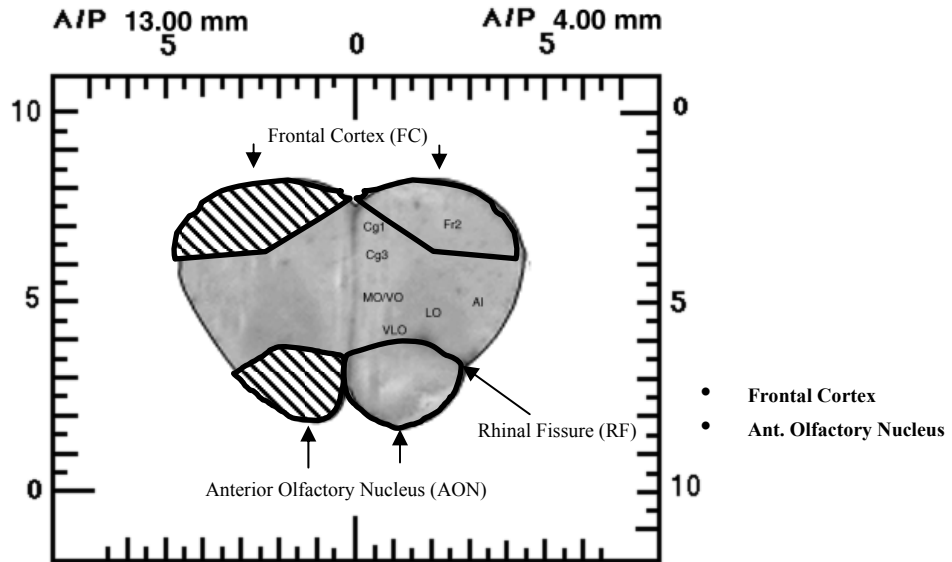

# Figure C02: 2<sup>nd</sup> Slice

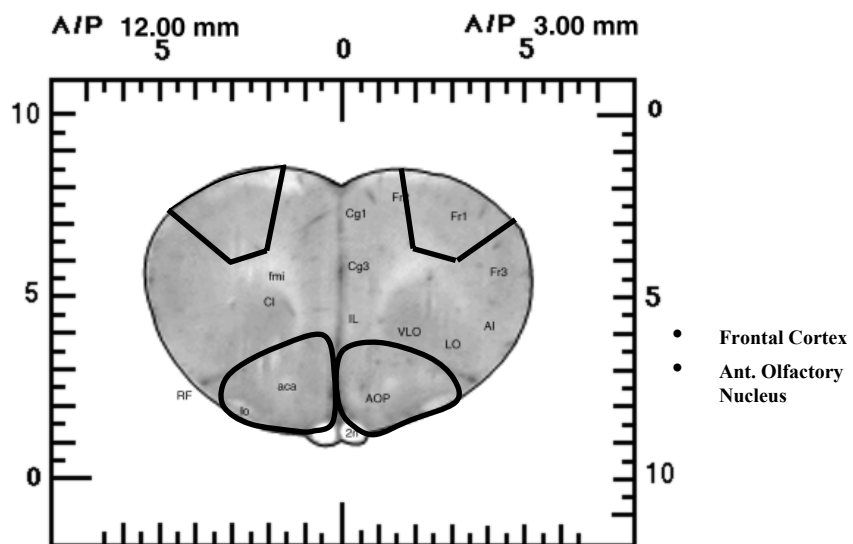

# Figure C03: 3<sup>rd</sup> Slice

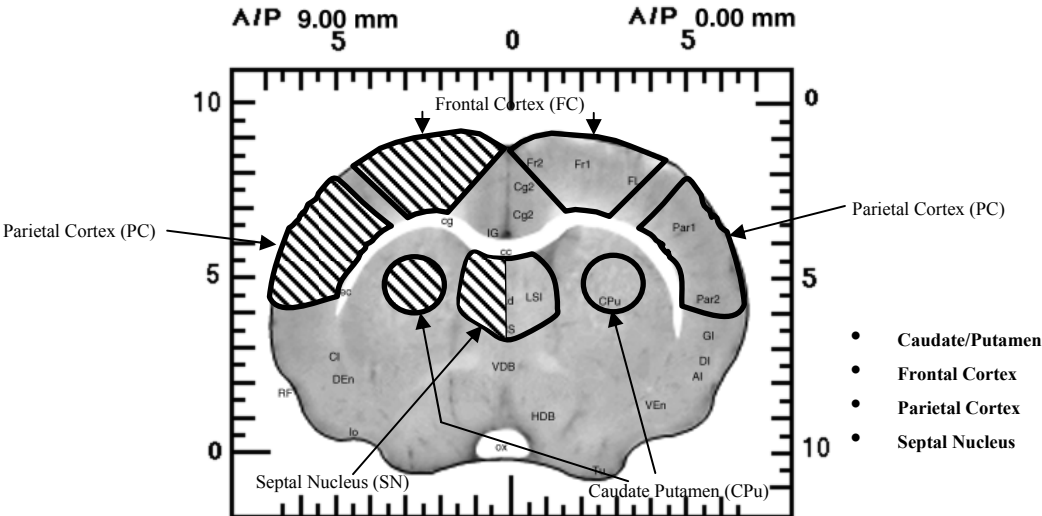

# Figure C04: 4<sup>th</sup> Slice

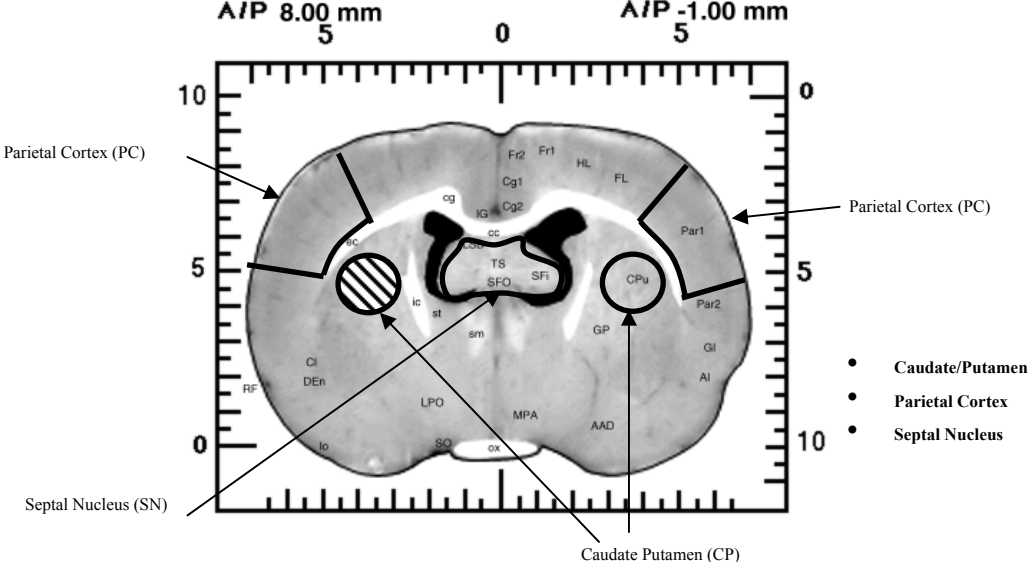



# Figure C05: 5<sup>th</sup> Slice

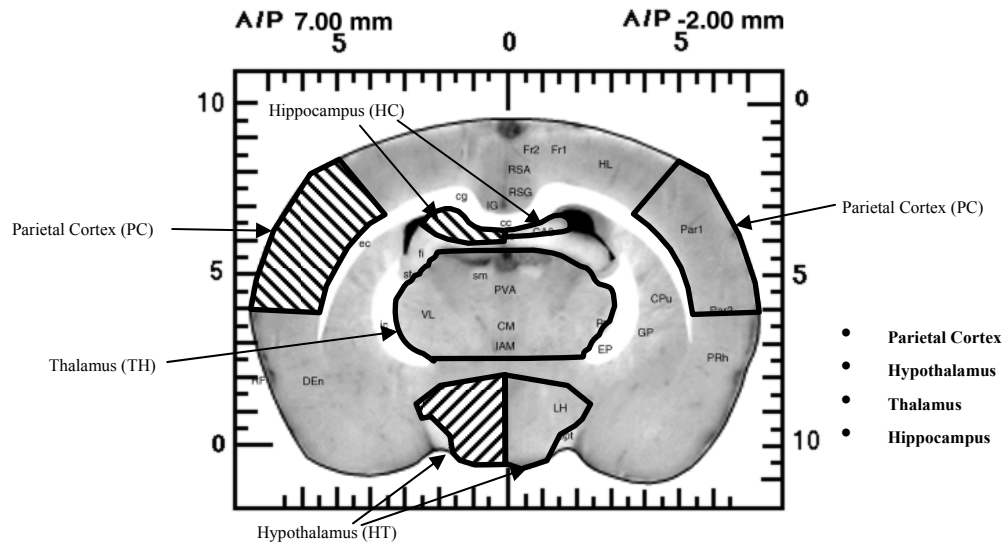

# Figure C06: 6<sup>th</sup> Slice

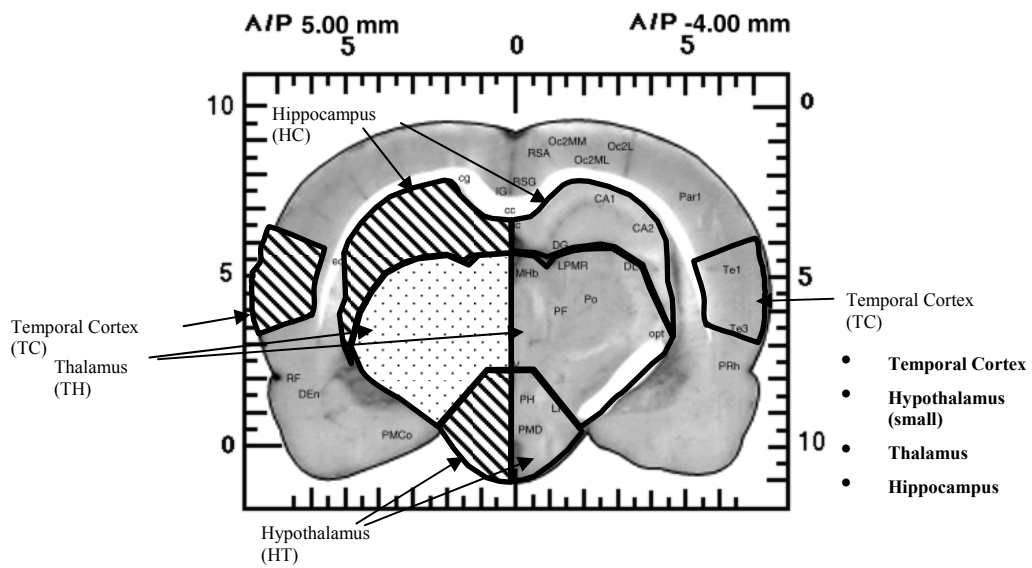

# Figure C07: Rat Brain Bisection

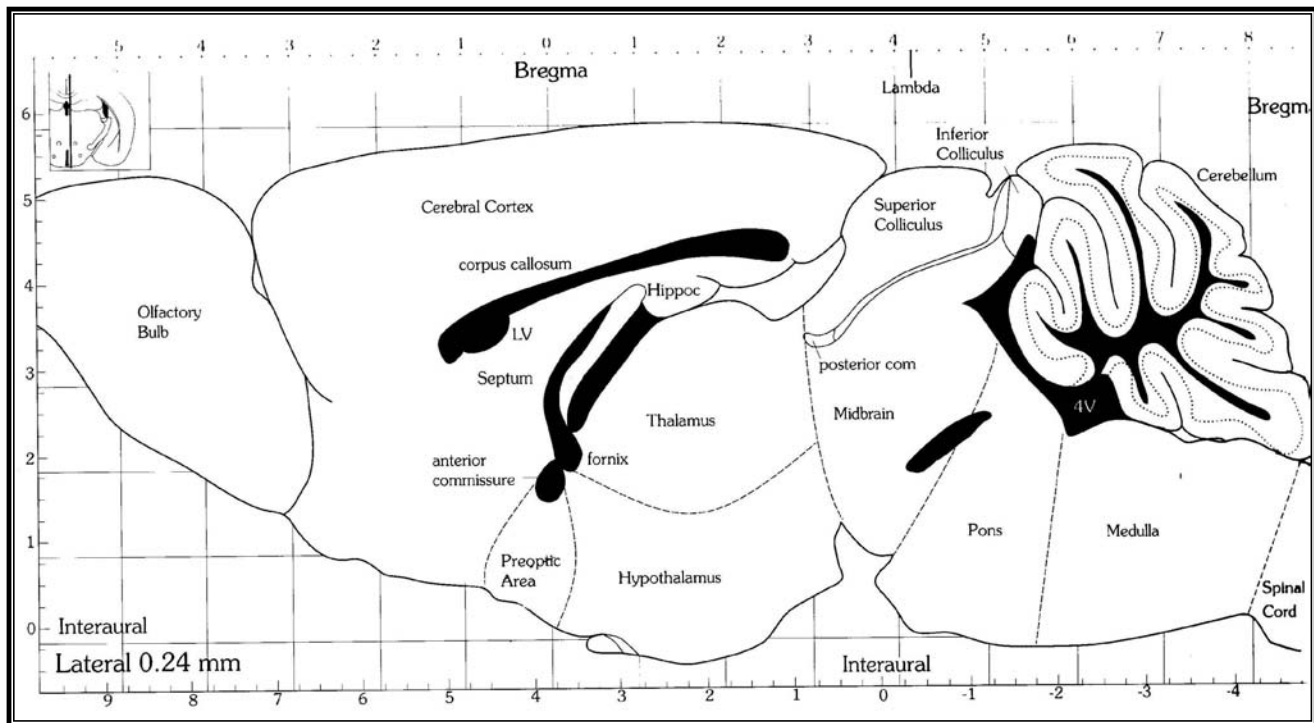

Supplement: 41398_2021_1511_MOESM1_ESM.pdf [file 41398_2021_1511_MOESM1_ESM.pdf]
